# Supplementary material for: Isothiourea-catalysed enantioselective annulation of 2-aminobenzothiophenes with α,β-unsaturated anhydrides
Source: Royal Society of Chemistry journal article supplement (doi:10.1039/d2qo01023b), 2022-01-01
Supplement: d2qo01023b1.pdf [file d2qo01023b1.pdf]

## Isothiourea-catalysed Enantioselective Annulation of 2-Aminobenzothiophenes with $\alpha$ , $\beta$ -Unsaturated Anhydrides

Cheng Niu, Dong-Hua Xie and Da-Ming Du\*

School of Chemistry and Chemical Engineering, Beijing Institute of Technology,  
Beijing 100081, People's Republic of China

E-mail: [dudm@bit.edu.cn](mailto:dudm@bit.edu.cn)

### Supporting Information

#### Content

|                                                                                    |     |
|------------------------------------------------------------------------------------|-----|
| 1. General information.....                                                        | S1  |
| 2. Starting materials.....                                                         | S1  |
| 3. Enantioselective synthesis and characterization of compounds <b>3</b> .....     | S5  |
| 4. Synthetic procedure and the characterization data of compounds <b>4–6</b> ..... | S14 |
| 5. Crystal data and structure refinement.....                                      | S17 |
| 6. Reference.....                                                                  | S18 |
| 7. Copies of $^1\text{H}$ and $^{13}\text{C}$ NMR spectra of new compounds.....    | S19 |
| 8. Copies of HPLC chromatograms of new products.....                               | S85 |

## 1. General information

Commercially available reagents were used without further purification. Some benzo thiophene-2-carboxylic acid were purchased from Shanghai Haohong Scientific Co., Ltd. A Column chromatography was performed with silica gel (200-300 mesh). Melting points were determined with an XT-4 melting-point apparatus and are uncorrected. <sup>1</sup>H NMR spectra were measured with Bruker Ascend 400 MHz spectrometer in CDCl<sub>3</sub>, chemical shifts were reported in  $\delta$  (ppm) units relative to tetramethylsilane (TMS) as the internal standard. <sup>13</sup>C NMR spectra were measured at 100 MHz (or 176 MHz) with a Bruker Ascend 400 MHz (or 700 MHz) spectrometer, chemical shifts were reported in  $\delta$  (ppm) relative to tetramethylsilane and referenced to the solvent peak (CDCl<sub>3</sub> at 77.0 ppm). High resolution mass spectra were measured with an Agilent 6520 Accurate-Mass-Q-TOF MS system equipped with an electrospray ionization (ESI) source. Enantiomeric excesses were determined by chiral HPLC analysis using an Agilent 1200 LC instrument with a Daicel Chiralpak AD-H, IA and IB column. Optical rotations were measured with a Krüss P8000 polarimeter at the indicated concentration with the units of grams per 100 mL.

## 2. Starting materials

**2a–2k** were prepared according to the literature.<sup>[1]</sup> The isothiurea organocatalysts were prepared according to the literature.<sup>[2]</sup>

**1a–1j** were prepared according to the following method.<sup>[3]</sup> **1k** were prepared according to the literature.<sup>[4]</sup>

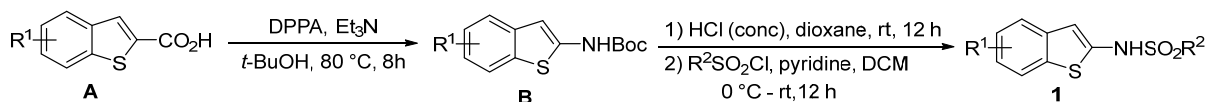

A mixture of benzo[*b*]thiophene-2-carboxylic acid **A** (10 mmol, 1.0 equiv), Et<sub>3</sub>N (10.5 mmol, 1.05 equiv), diphenyl azidophosphate (DPPA, 12 mmol, 1.2 equiv), and *t*-BuOH (20 mL) was heated at 80 °C for 8 h. Afterwards the solvent was evaporated by reduce pressure and purified by flash column chromatography on silica gel (petroleum ether/ethyl acetate = 10:1) to afford product **B**.

To solution of **B** (5.0 mmol) in dioxane (8.5 mL) followed by HCl (conc., 1.5 mL) was added dropwise, and the resulting suspension was stirred at room temperature for 24 h. Then the mixture was filtered. The precipitate was washed with MTBE (3 × 5 mL) and drying. To a solution of precipitate (1.0 mmol, 1.0 equiv) in dry DCM (5 mL) and cooled to 0 °C, pyridine (2.5 mmol, 2.5 equiv) followed by the corresponding sulfonyl chloride (1.2 mmol, 1.2 equiv) was added dropwise, and the resulting suspension was stirred at room temperature for about 6

h (monitored by TLC). Then 0.5 N HCl (20 mL) was added and extracted with DCM (3 × 10 mL). The combined organic phase was dried over Na<sub>2</sub>SO<sub>4</sub> and concentrated. The residue was purified by flash column chromatography on silica gel (petroleum ether/ethyl acetate = 5:1 to 3:1) to afford compound **1**.

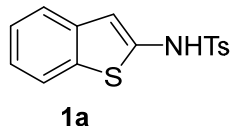

***N*-(Benzo[*b*]thiophen-2-yl)-4-methylbenzenesulfonamide (1a)**. Pink solid (0.6978 g, 46% yield for three steps), m.p. 104–105 °C. <sup>1</sup>H NMR (400 MHz, CDCl<sub>3</sub>): δ 7.75 (d, *J* = 8.4 Hz, 1H, ArH), 7.62 – 7.55 (m, 3H, ArH), 7.29 – 7.20 (m, 4H, ArH + NH), 6.91 (s, 1H, ArH), 2.34 (s, 3H, CH<sub>3</sub>) ppm. <sup>13</sup>C NMR (100 MHz, CDCl<sub>3</sub>): δ 144.4, 137.9, 137.6, 136.6, 135.1, 129.7, 127.5, 124.6, 124.2, 123.2, 121.9, 116.3, 21.5 ppm. HRMS (ESI): *m/z* calcd. for C<sub>15</sub>H<sub>14</sub>NO<sub>2</sub>S<sub>2</sub> [M + H]<sup>+</sup> 304.0460, found 304.0461.

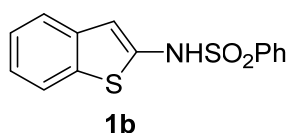

***N*-(Benzo[*b*]thiophen-2-yl)benzenesulfonamide (1b)**. Brown solid (0.7959 g, 55% yield for three steps), m.p. 119–121 °C. <sup>1</sup>H NMR (400 MHz, CDCl<sub>3</sub>): δ 7.86 (d, *J* = 8.0 Hz, 1H, ArH), 7.62 – 7.52 (m, 4H, ArH + NH), 7.43 (t, *J* = 7.6 Hz, 2H, ArH), 7.30 – 7.22 (m, 2H, ArH), 6.93 (s, 1H, ArH) ppm. <sup>13</sup>C NMR (100 MHz, CDCl<sub>3</sub>): δ 138.2, 137.9, 137.3, 136.7, 133.4, 129.1, 127.4, 124.7, 124.4, 123.3, 122.0, 116.9 ppm. HRMS (ESI): *m/z* calcd. for C<sub>14</sub>H<sub>12</sub>NO<sub>2</sub>S<sub>2</sub> [M + H]<sup>+</sup> 290.0304, found 290.0281.

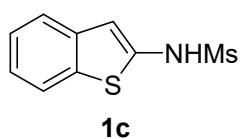

***N*-(Benzo[*b*]thiophen-2-yl)methanesulfonamide (1c)**. Pink solid (0.6364 g, 56% yield for three steps), m.p. 146–147 °C. <sup>1</sup>H NMR (400 MHz, CDCl<sub>3</sub>): δ 7.72 – 7.67 (m, 2H, ArH), 7.37 – 7.29 (m, 2H, ArH), 7.13 (s, 1H, ArH), 7.11 (br s, 1H, NH), 3.11 (s, 3H, CH<sub>3</sub>) ppm. <sup>13</sup>C NMR (176 MHz, CDCl<sub>3</sub>): δ 138.1, 137.2, 136.5, 125.0, 124.7, 123.5, 122.1, 116.8, 39.3 ppm. HRMS (ESI): *m/z* calcd. for C<sub>9</sub>H<sub>10</sub>NNaO<sub>2</sub>S<sub>2</sub> [M + Na]<sup>+</sup> 249.9967, found 224.9952.

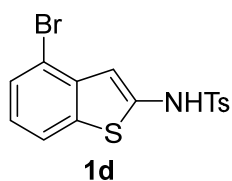

***N*-(4-Bromobenzo[*b*]thiophen-2-yl)-4-methylbenzenesulfonamide (1d).** Pink solid (0.7073 g, 37% yield for three steps), m.p. 125–128 °C. <sup>1</sup>H NMR (400 MHz, CDCl<sub>3</sub>): δ 7.78 (d, *J* = 8.4 Hz, 2H, ArH), 7.55 (d, *J* = 8.0 Hz, 1H, ArH), 7.43 (dd, *J*<sub>1</sub> = 7.6, *J*<sub>2</sub> = 0.8 Hz, 1H, ArH), 7.25 (d, *J* = 8.0 Hz, 2H, ArH), 7.08 (t, *J* = 8.0 Hz, 1H, ArH), 6.98 (s, 1H, ArH), 2.37 (s, 3H, CH<sub>3</sub>) ppm. <sup>13</sup>C NMR (176 MHz, CDCl<sub>3</sub>): δ 144.6, 138.7, 137.9, 136.8, 135.0, 129.9, 127.9, 127.5, 125.0, 121.0, 116.6, 115.2, 21.6 ppm. HRMS (ESI): *m/z* calcd. for C<sub>15</sub>H<sub>13</sub><sup>79</sup>BrNO<sub>2</sub>S<sub>2</sub> [M + H]<sup>+</sup> 381.9566, found 381.9567, calcd. for C<sub>15</sub>H<sub>13</sub><sup>81</sup>BrNO<sub>2</sub>S<sub>2</sub> [M + H]<sup>+</sup> 383.9546, found 383.9546.

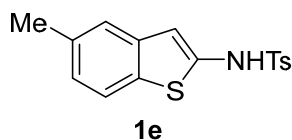

**4-Methyl-*N*-(5-methylbenzo[*b*]thiophen-2-yl)benzenesulfonamide (1e).** Pink solid (0.4920 g, 31% yield for three steps), m.p. 149–150 °C. <sup>1</sup>H NMR (400 MHz, CDCl<sub>3</sub>): δ 7.72 (d, *J* = 8.4 Hz, 2H, ArH), 7.51 (d, *J* = 8.0 Hz, 1H, ArH), 7.41 (s, 1H, ArH), 7.24 (d, *J* = 8.4 Hz, 2H, ArH), 7.10 (dd, *J*<sub>1</sub> = 8.2, *J*<sub>2</sub> = 1.0 Hz, 1H, ArH), 6.95 (br s, 1H, NH), 6.87 (s, 1H, ArH), 2.41 (s, 3H, CH<sub>3</sub>), 2.38 (s, 3H, CH<sub>3</sub>) ppm. <sup>13</sup>C NMR (100 MHz, CDCl<sub>3</sub>): δ 144.3, 138.2, 137.4, 135.3, 134.5, 133.8, 129.7, 127.5, 126.1, 123.4, 121.7, 116.8, 21.6, 21.4 ppm. HRMS (ESI): *m/z* calcd. for C<sub>16</sub>H<sub>16</sub>NO<sub>2</sub>S<sub>2</sub> [M + H]<sup>+</sup> 318.0617, found 318.0613.

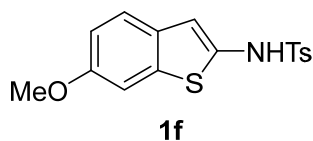

***N*-(6-Methoxybenzo[*b*]thiophen-2-yl)-4-methylbenzenesulfonamide (1f).** Pink solid (0.2506 g, 15% yield for three steps), m.p. 115–116 °C. <sup>1</sup>H NMR (400 MHz, CDCl<sub>3</sub>): δ 7.72 (d, *J* = 8.4 Hz, 2H, ArH), 7.47 (d, *J* = 8.8 Hz, 1H, ArH), 7.23 (d, *J* = 8.0 Hz, 2H, ArH), 7.17 (s, 1H, NH), 7.10 (d, *J* = 2.4 Hz, 1H, ArH), 6.91 (dd, *J*<sub>1</sub> = 8.4, *J*<sub>2</sub> = 2.4 Hz, 1H, ArH), 6.85 (s, 1H, ArH), 3.81 (s, 3H, CH<sub>3</sub>), 2.38 (s, 3H, CH<sub>3</sub>) ppm. <sup>13</sup>C NMR (176 MHz, CDCl<sub>3</sub>): δ 157.4, 144.2, 138.5, 135.3, 134.6, 131.6, 129.7, 127.5, 124.2, 117.9, 114.4, 104.8, 55.5, 21.5 ppm. HRMS (ESI): *m/z* calcd. for C<sub>16</sub>H<sub>16</sub>NO<sub>3</sub>S<sub>2</sub> [M + H]<sup>+</sup> 334.0566, found 334.0552.

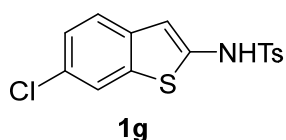

***N*-(6-Chlorobenzo[*b*]thiophen-2-yl)-4-methylbenzenesulfonamide (1g).** White solid (0.2871 g, 17% yield for three steps), m.p. 143–145 °C. <sup>1</sup>H NMR (400 MHz, CDCl<sub>3</sub>): δ 7.74 (d, *J* = 8.4 Hz, 2H, ArH), 7.58 (d, *J* = 1.6 Hz, 1H, ArH), 7.49 (br s, 1H, NH), 7.47 (d, *J* = 8.4 Hz, 1H, ArH), 7.25 – 7.23 (m, 3H, ArH), 6.88 (s, 1H, ArH), 3.81 (s, 3H, CH<sub>3</sub>), 2.38 (s, 3H, CH<sub>3</sub>)

ppm.  $^{13}\text{C}$  NMR (176 MHz,  $\text{CDCl}_3$ ):  $\delta$  144.6, 138.0, 137.5, 136.3, 135.0, 130.2, 129.8, 127.5, 125.5, 124.1, 121.6, 115.9, 21.6 ppm. HRMS (ESI):  $m/z$  calcd. for  $\text{C}_{15}\text{H}_{13}\text{ClNO}_2\text{S}_2$  [ $\text{M} + \text{H}$ ] $^+$  338.0071, found 338.0072.

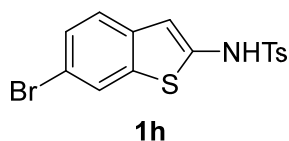

***N*-(6-Bromobenzo[*b*]thiophen-2-yl)-4-methylbenzenesulfonamide (1h).** White solid (0.7646 g, 40% yield for three steps), m.p. 154–155 °C.  $^1\text{H}$  NMR (400 MHz,  $\text{CDCl}_3$ ):  $\delta$  7.75 – 7.72 (m, 3H, ArH), 7.45 – 7.38 (m, 2H, ArH), 7.25 (d,  $J$  = 6.8 Hz, 3H, NH + ArH), 6.88 (s, 1H, ArH), 2.39 (s, 3H,  $\text{CH}_3$ ) ppm.  $^{13}\text{C}$  NMR (176 MHz,  $\text{CDCl}_3$ ):  $\delta$  144.6, 138.1, 137.9, 136.6, 135.1, 129.8, 128.1, 127.5, 124.5, 124.4, 117.9, 116.0, 21.6 ppm. HRMS (ESI):  $m/z$  calcd. for  $\text{C}_{15}\text{H}_{13}^{79}\text{BrNNaO}_2\text{S}_2$  [ $\text{M} + \text{Na}$ ] $^+$  403.9385, found 403.9377, calcd. for  $\text{C}_{15}\text{H}_{13}^{81}\text{BrNNaO}_2\text{S}_2$  [ $\text{M} + \text{Na}$ ] $^+$  405.9365, found 405.9357.

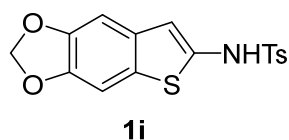

**4-Methyl-*N*-(thieno[2',3':4,5]benzo[1,2-*d*][1,3]dioxol-6-yl)benzenesulfonamide (1i).** White solid (0.1911 g, 11% yield for three steps), mp 126–128 °C.  $^1\text{H}$  NMR (400 MHz,  $\text{CDCl}_3$ ):  $\delta$  7.70 (d,  $J$  = 8.4 Hz, 2H, ArH), 7.24 (d,  $J$  = 8.4 Hz, 2H, ArH), 7.04 (br s, 1H, NH), 7.01 (s, 1H, ArH), 6.98 (s, 1H, ArH), 6.81 (s, 1H, ArH), 5.96 (s, 2H,  $\text{CH}_2$ ), 2.39 (s, 3H,  $\text{CH}_3$ ) ppm.  $^{13}\text{C}$  NMR (176 MHz,  $\text{CDCl}_3$ ):  $\delta$  146.7, 146.6, 144.3, 135.3, 135.2, 131.9, 130.5, 129.7, 127.5, 118.6, 102.4, 101.4, 101.2, 21.6 ppm. HRMS (ESI):  $m/z$  calcd. for  $\text{C}_{16}\text{H}_{13}\text{NNaO}_4\text{S}_2$  [ $\text{M} + \text{Na}$ ] $^+$  370.0178, found 370.0170.

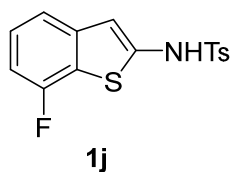

***N*-(7-Fluorobenzo[*b*]thiophen-2-yl)-4-methylbenzenesulfonamide (1j).** White solid (0.8839 g, 55% yield for three steps), m.p. 102–103 °C.  $^1\text{H}$  NMR (400 MHz,  $\text{CDCl}_3$ ):  $\delta$  7.77 (d,  $J$  = 8.0 Hz, 2H, ArH), 7.67 (br s, 1H, NH), 7.36 (d,  $J$  = 8.0 Hz, 1H, ArH), 7.25 – 7.20 (m, 3H, ArH), 6.96 – 6.92 (m, 2H, ArH), 2.37 (s, 3H,  $\text{CH}_3$ ) ppm.  $^{13}\text{C}$  NMR (100 MHz,  $\text{CDCl}_3$ ):  $\delta$  157.0 (d,  $^1J_{\text{C-F}}$  = 245.4 Hz), 144.6, 140.9 (d,  $^3J_{\text{C-F}}$  = 4.7 Hz), 138.8 (d,  $^4J_{\text{C-F}}$  = 1.3 Hz), 135.0, 129.8, 127.5, 125.9 (d,  $^3J_{\text{C-F}}$  = 6.9 Hz), 123.2 (d,  $^2J_{\text{C-F}}$  = 9.0 Hz), 119.0 (d,  $^4J_{\text{C-F}}$  = 3.4 Hz), 116.1 (d,  $^4J_{\text{C-F}}$  = 2.3 Hz), 109.4 (d,  $^2J_{\text{C-F}}$  = 18.3 Hz), 21.5 ppm. HRMS (ESI):  $m/z$  calcd. for  $\text{C}_{15}\text{H}_{13}\text{FNO}_2\text{S}_2$  [ $\text{M} + \text{H}$ ] $^+$  322.0366, found 322.0348.

### 3. Enantioselective synthesis and characterization of compounds 3

Benzenesulfonamide **1** (0.1 mmol), cinnamic acid anhydride **2** (0.12 mmol), NaHCO<sub>3</sub> (8.4 mg, 0.1 mmol), and catalyst **C1** (2.5 mg, 0.01 mmol) were dissolved in toluene (1.0 mL), and the mixture was stirred at room temperature for 24 – 72 h (monitored by TLC). After completion of the reaction, the residue was purified by flash column chromatography on silica gel (petroleum ether/ethyl acetate = 9:1 to 7:1) to afford the pure products **3**. Racemates were prepared following a similar procedure using 2,3-dihydrobenzo[*d*]imidazo[2,1-*b*]thiazole as catalyst (10 mol%).

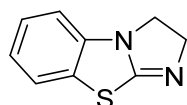

2,3-dihydrobenzo[*d*]imidazo[2,1-*b*]thiazole

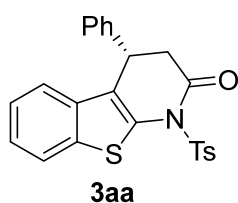

**(S)-4-Phenyl-1-tosyl-3,4-dihydrobenzo[4,5]thieno[2,3-*b*]pyridin-2(1H)-one (3aa)**. White solid (39.9 mg, 92% yield, 96:4 er), m.p. 149–150 °C. HPLC (Daicel Chiralpak AD-H, *n*-hexane/2-propanol = 70:30, flow rate 1.0 mL/min, detection at 254 nm): *t*<sub>R</sub> = 13.0 (minor), *t*<sub>R</sub> = 13.9 min (major); 96:4 er. [α]<sub>D</sub><sup>25</sup> = +30.1° (*c* = 2.10, CH<sub>2</sub>Cl<sub>2</sub>). <sup>1</sup>H NMR (400 MHz, CDCl<sub>3</sub>): δ 7.91 (d, *J* = 8.4 Hz, 2H, ArH), 7.81 – 7.78 (m, 1H, ArH), 7.45 – 7.42 (m, 1H, ArH), 7.31 – 7.29 (m, 2H, ArH), 7.23 (d, *J* = 8.4 Hz, 2H, ArH), 7.09 (t, *J* = 7.2 Hz, 1H, ArH), 6.99 (t, *J* = 7.4 Hz, 2H, ArH), 6.80 (d, *J* = 7.6 Hz, 2H, ArH), 4.43 (dd, *J*<sub>1</sub> = 7.0 Hz, *J*<sub>2</sub> = 1.8 Hz, 1H, CH), 3.18 (dd, *J*<sub>1</sub> = 15.0 Hz, *J*<sub>2</sub> = 7.0 Hz, 1H, CH<sub>2</sub>), 2.92 (dd, *J*<sub>1</sub> = 15.0 Hz, *J*<sub>2</sub> = 2.2 Hz, 1H, CH<sub>2</sub>), 2.42 (s, 3H, CH<sub>3</sub>) ppm. <sup>13</sup>C NMR (176 MHz, CDCl<sub>3</sub>): δ 168.3, 145.6, 139.6, 136.7, 135.4, 135.0, 134.5, 129.4, 128.71, 128.66, 127.1, 126.5, 124.8, 124.4, 121.9, 120.8, 120.6, 41.5, 36.3, 21.7 ppm. HRMS (ESI): *m/z* calcd. for C<sub>24</sub>H<sub>20</sub>NO<sub>3</sub>S<sub>2</sub> [M + H]<sup>+</sup> 434.0879, found 434.0871.

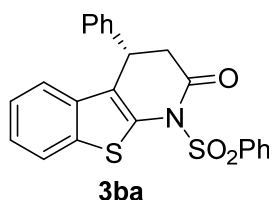

**(S)-4-Phenyl-1-(phenylsulfonyl)-3,4-dihydrobenzo[4,5]thieno[2,3-*b*]pyridin-2(1H)-one (3ba)**. White solid (35.7 mg, 85% yield, 95:5 er), m.p. 193–195 °C. HPLC (Daicel Chiralpak AD-H, *n*-hexane/2-propanol = 95:5, flow rate 1.0 mL/min, detection at 254 nm): *t*<sub>R</sub> = 52.7 (major), *t*<sub>R</sub> = 56.6 min (minor); 95:5 er. [α]<sub>D</sub><sup>25</sup> = +23.1° (*c* = 2.70, CH<sub>2</sub>Cl<sub>2</sub>). <sup>1</sup>H NMR (400 MHz,

CDCl<sub>3</sub>):  $\delta$  8.06 – 8.04 (m, 2H, ArH), 7.84 – 7.81 (m, 1H, ArH), 7.64 (t,  $J$  = 7.6 Hz, 1H, ArH), 7.50 – 7.44 (m, 3H, ArH), 7.33 – 7.31 (m, 2H, ArH), 7.09 (t,  $J$  = 7.2 Hz, 1H, ArH), 7.00 (t,  $J$  = 7.4 Hz, 2H, ArH), 6.80 (d,  $J$  = 7.6 Hz, 2H, ArH), 4.45 (dd,  $J_1$  = 7.2 Hz,  $J_2$  = 2.0 Hz, 1H, CH), 3.23 (dd,  $J_1$  = 15.4 Hz,  $J_2$  = 7.2 Hz, 1H, CH<sub>2</sub>), 2.95 (dd,  $J_1$  = 15.0 Hz,  $J_2$  = 2.2 Hz, 1H, CH<sub>2</sub>) ppm. <sup>13</sup>C NMR (176 MHz, CDCl<sub>3</sub>):  $\delta$  168.3, 139.5, 137.6, 136.8, 135.4, 135.0, 134.4, 128.9, 128.8, 128.7, 127.3, 126.5, 124.9, 124.5, 121.9, 120.8, 120.7, 41.6, 36.4 ppm. HRMS (ESI):  $m/z$  calcd. for C<sub>23</sub>H<sub>18</sub>NO<sub>3</sub>S<sub>2</sub> [M + H]<sup>+</sup> 420.0723, found 420.0723.

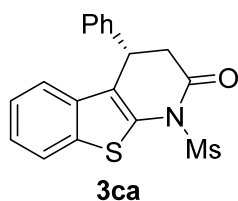

**(S)-1-(Methylsulfonyl)-4-phenyl-3,4-dihydrobenzo[4,5]thieno[2,3-*b*]pyridin-2(1H)-one**

**(3ca).** White solid (28.6 mg, 80% yield, 96:4 er), m.p. 178–179 °C. HPLC (Daicel Chiralpak AD-H, *n*-hexane/2-propanol = 60:40, flow rate 1.0 mL/min, detection at 254 nm):  $t_R$  = 11.0 (minor),  $t_R$  = 22.8 min (major); 96:4 er.  $[\alpha]_D^{25}$  = +16.9° ( $c$  = 1.54, CH<sub>2</sub>Cl<sub>2</sub>). <sup>1</sup>H NMR (400 MHz, CDCl<sub>3</sub>):  $\delta$  7.79 – 7.76 (m, 1H, ArH), 7.48 – 7.46 (m, 1H, ArH), 7.32 – 7.28 (m, 4H, ArH), 7.26 – 7.24 (m, 1H, ArH), 7.17 (d,  $J$  = 7.2 Hz, 2H, ArH), 4.58 (dd,  $J_1$  = 6.8 Hz,  $J_2$  = 2.4 Hz, 1H, CH), 3.37 (s, 3H, CH<sub>3</sub>), 3.28 (dd,  $J_1$  = 15.4 Hz,  $J_2$  = 7.0 Hz, 1H, CH<sub>2</sub>), 3.16 (dd,  $J_1$  = 15.4 Hz,  $J_2$  = 2.6 Hz, 1H, CH<sub>2</sub>) ppm. <sup>13</sup>C NMR (176 MHz, CDCl<sub>3</sub>):  $\delta$  169.9, 139.5, 136.7, 134.7, 129.1, 127.7, 126.7, 124.9, 124.5, 121.9, 120.9, 120.2, 42.4, 41.6, 35.9 ppm. HRMS (ESI):  $m/z$  calcd. for C<sub>18</sub>H<sub>16</sub>NO<sub>3</sub>S<sub>2</sub> [M + H]<sup>+</sup> 358.0566, found 358.0564.

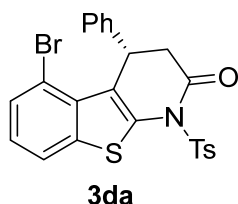

**(S)-5-Bromo-4-phenyl-1-tosyl-3,4-dihydrobenzo[4,5]thieno[2,3-*b*]pyridin-2(1H)-one**

**(3da).** White solid (48.7 mg, 95% yield, 96:4 er), m.p. 199–201 °C. HPLC (Daicel Chiralpak AD-H, *n*-hexane/2-propanol = 60:40, flow rate 1.0 mL/min, detection at 254 nm):  $t_R$  = 9.3 (major),  $t_R$  = 10.9 min (minor); 96:4 er.  $[\alpha]_D^{25}$  = +95.1° ( $c$  = 1.00, CH<sub>2</sub>Cl<sub>2</sub>). <sup>1</sup>H NMR (400 MHz, CDCl<sub>3</sub>):  $\delta$  7.84 (d,  $J$  = 8.4 Hz, 2H, ArH), 7.77 (dd,  $J_1$  = 8.0 Hz,  $J_2$  = 0.8 Hz, 1H, ArH), 7.50 (dd,  $J_1$  = 7.8 Hz,  $J_2$  = 1.0 Hz, 1H, ArH), 7.20 (d,  $J$  = 8.0 Hz, 2H, ArH), 7.14 (t,  $J$  = 7.8 Hz, 1H, ArH), 7.07 (t,  $J$  = 7.4 Hz, 1H, ArH), 6.99 (t,  $J$  = 7.6 Hz, 2H, ArH), 6.81 (d,  $J$  = 7.6 Hz, 2H, ArH), 5.44 (dd,  $J_1$  = 6.4 Hz,  $J_2$  = 2.0 Hz, 1H, CH), 3.13 (dd,  $J_1$  = 15.0 Hz,  $J_2$  = 6.6 Hz, 1H, CH<sub>2</sub>), 2.94 (dd,  $J_1$  = 15.0 Hz,  $J_2$  = 2.2 Hz, 1H, CH<sub>2</sub>), 2.41 (s, 3H, CH<sub>3</sub>) ppm. <sup>13</sup>C NMR (100 MHz, CDCl<sub>3</sub>):  $\delta$  168.1, 145.6, 139.7, 139.0, 137.7, 134.5, 132.3, 130.4, 129.4, 128.7, 128.5, 127.0, 126.8, 125.1,

121.9, 121.3, 115.7, 41.5, 36.4, 21.7 ppm. HRMS (ESI):  $m/z$  calcd. for  $C_{24}H_{19}^{79}BrNO_3S_2$  [ $M + H$ ]<sup>+</sup> 511.9984, found 511.9982, calcd. for  $C_{24}H_{19}^{81}BrNO_3S_2$  [ $M + H$ ]<sup>+</sup> 513.9964, found 513.9966.

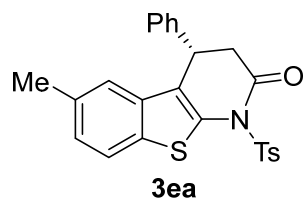

**(S)-6-Methyl-4-phenyl-1-tosyl-3,4-dihydrobenzo[4,5]thieno[2,3-*b*]pyridin-2(1*H*)-one**

**(3ea).** White solid (35.8 mg, 80% yield, 98:2 er), m.p. 83–84 °C. HPLC (Daicel Chiralpak AD-H, *n*-hexane/2-propanol = 60:40, flow rate 1.0 mL/min, detection at 254 nm):  $t_R$  = 9.1 (minor),  $t_R$  = 10.6 min (major); 98:2 er.  $[\alpha]_D^{25} = +69.7^\circ$  ( $c = 1.71$ ,  $CH_2Cl_2$ ). <sup>1</sup>H NMR (400 MHz,  $CDCl_3$ ):  $\delta$  7.90 (d,  $J = 8.4$  Hz, 2H, ArH), 7.68 (d,  $J = 8.0$  Hz, 1H, ArH), 7.24 – 7.22 (m, 3H, ArH), 7.14 (dd,  $J_1 = 8.0$  Hz,  $J_2 = 0.8$  Hz, 1H, ArH), 7.09 (t,  $J = 7.4$  Hz, 1H, ArH), 6.99 (t,  $J = 7.6$  Hz, 2H, ArH), 6.80 (d,  $J = 7.6$  Hz, 2H, ArH), 4.41 (dd,  $J_1 = 7.0$  Hz,  $J_2 = 1.8$  Hz, 1H, CH), 3.17 (dd,  $J_1 = 15.2$  Hz,  $J_2 = 7.2$  Hz, 1H,  $CH_2$ ), 2.91 (dd,  $J_1 = 15.2$  Hz,  $J_2 = 2.0$  Hz, 1H,  $CH_2$ ), 2.42 (s, 3H,  $CH_3$ ), 2.38 (s, 3H,  $CH_3$ ) ppm. <sup>13</sup>C NMR (100 MHz,  $CDCl_3$ ):  $\delta$  168.3, 145.5, 139.6, 135.6, 135.2, 134.7, 134.6, 134.0, 129.4, 128.72, 128.67, 127.1, 126.6, 126.1, 121.6, 120.8, 120.4, 41.6, 36.3, 21.7, 21.5 ppm. HRMS (ESI):  $m/z$  calcd. for  $C_{25}H_{22}NO_3S_2$  [ $M + H$ ]<sup>+</sup> 448.1036, found 448.1031.

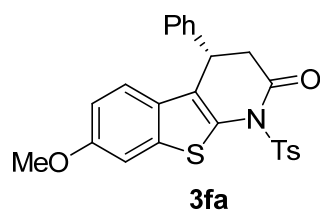

**(S)-7-Methoxy-4-phenyl-1-tosyl-3,4-dihydrobenzo[4,5]thieno[2,3-*b*]pyridin-2(1*H*)-one**

**(3fa).** White solid (44.5 mg, 96% yield, 97:3 er), m.p. 88–89 °C. HPLC (Daicel Chiralpak AD-H, *n*-hexane/2-propanol = 60:40, flow rate 1.0 mL/min, detection at 254 nm):  $t_R$  = 13.6 (major),  $t_R$  = 16.2 min (minor); 97:3 er.  $[\alpha]_D^{25} = +91.4^\circ$  ( $c = 3.13$ ,  $CH_2Cl_2$ ). <sup>1</sup>H NMR (400 MHz,  $CDCl_3$ ):  $\delta$  7.89 (d,  $J = 8.4$  Hz, 2H, ArH), 7.31 – 7.28 (m, 2H, ArH), 7.23 (d,  $J = 8.4$  Hz, 2H, ArH), 7.08 (t,  $J = 7.2$  Hz, 1H, ArH), 6.98 (t,  $J = 7.6$  Hz, 2H, ArH), 6.92 (dd,  $J_1 = 8.8$  Hz,  $J_2 = 2.4$  Hz, 1H, ArH), 6.79 (d,  $J = 7.6$  Hz, 2H, ArH), 4.37 (dd,  $J_1 = 7.0$  Hz,  $J_2 = 2.2$  Hz, 1H, CH), 3.85 (s, 3H,  $CH_3$ ), 3.17 (dd,  $J_1 = 15.0$  Hz,  $J_2 = 7.0$  Hz, 1H,  $CH_2$ ), 2.90 (dd,  $J_1 = 15.0$  Hz,  $J_2 = 2.2$  Hz, 1H,  $CH_2$ ), 2.42 (s, 3H,  $CH_3$ ) ppm. <sup>13</sup>C NMR (100 MHz,  $CDCl_3$ ):  $\delta$  168.3, 157.4, 145.5, 139.6, 138.3, 134.5, 132.7, 129.4, 128.8, 128.7, 128.6, 127.1, 126.5, 121.6, 120.5, 114.5, 104.6, 55.6, 41.5, 36.4, 21.6 ppm. HRMS (ESI):  $m/z$  calcd. for  $C_{25}H_{22}NO_4S_2$  [ $M + H$ ]<sup>+</sup> 464.0985, found 464.0979.



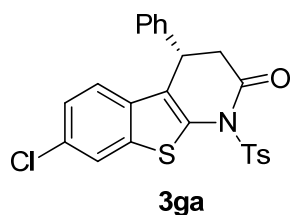

**(S)-7-Chloro-4-phenyl-1-tosyl-3,4-dihydrobenzo[4,5]thieno[2,3-*b*]pyridin-2(1*H*)-one**

**(3ga).** White solid (43.1 mg, 92% yield, 90:10 er), m.p. 110–112 °C. HPLC (Daicel Chiralpak AD-H, *n*-hexane/2-propanol = 60:40, flow rate 1.0 mL/min, detection at 254 nm):  $t_R$  = 11.6 (minor),  $t_R$  = 12.6 min (major); 90:10 er.  $[\alpha]_D^{25} = +95.1^\circ$  ( $c = 2.24$ ,  $\text{CH}_2\text{Cl}_2$ ).  $^1\text{H NMR}$  (400 MHz,  $\text{CDCl}_3$ ):  $\delta$  7.90 (d,  $J = 8.4$  Hz, 2H, ArH), 7.76 (d,  $J = 1.6$  Hz, 1H, ArH), 7.32 (d,  $J = 8.4$  Hz, 1H, ArH), 7.27 – 7.23 (m, 3H, ArH), 7.11 (t,  $J = 7.4$  Hz, 1H, ArH), 7.00 (t,  $J = 7.6$  Hz, 2H, ArH), 6.78 (d,  $J = 7.6$  Hz, 2H, ArH), 4.40 (dd,  $J_1 = 7.0$  Hz,  $J_2 = 2.2$  Hz, 1H, CH), 3.19 (dd,  $J_1 = 15.2$  Hz,  $J_2 = 7.2$  Hz, 1H,  $\text{CH}_2$ ), 2.92 (dd,  $J_1 = 15.2$  Hz,  $J_2 = 2.4$  Hz, 1H,  $\text{CH}_2$ ), 2.43 (s, 3H,  $\text{CH}_3$ ) ppm.  $^{13}\text{C NMR}$  (176 MHz,  $\text{CDCl}_3$ ):  $\delta$  168.0, 145.7, 139.3, 137.7, 135.8, 134.4, 133.4, 130.3, 129.5, 128.8, 128.7, 127.3, 126.5, 125.6, 121.7, 121.5, 120.1, 41.4, 36.4, 21.7 ppm. HRMS (ESI):  $m/z$  calcd. for  $\text{C}_{24}\text{H}_{19}\text{ClNO}_3\text{S}_2$   $[\text{M} + \text{H}]^+$  468.0489, found 468.0490.

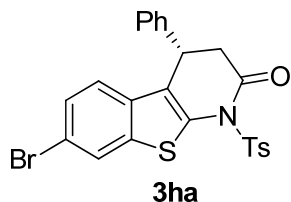

**(S)-7-Bromo-4-phenyl-1-tosyl-3,4-dihydrobenzo[4,5]thieno[2,3-*b*]pyridin-2(1*H*)-one**

**(3ha).** White solid (44.1 mg, 86% yield, 92:8 er), m.p. 161–162 °C. HPLC (Daicel Chiralpak AD-H, *n*-hexane/2-propanol = 60:40, flow rate 1.0 mL/min, detection at 254 nm):  $t_R$  = 12.5 (minor),  $t_R$  = 13.7 min (major); 92:8 er.  $[\alpha]_D^{25} = +99.9^\circ$  ( $c = 3.15$ ,  $\text{CH}_2\text{Cl}_2$ ).  $^1\text{H NMR}$  (400 MHz,  $\text{CDCl}_3$ ):  $\delta$  7.93 – 7.90 (m, 3H, ArH), 7.39 (dd,  $J_1 = 8.4$  Hz,  $J_2 = 1.6$  Hz, 1H, ArH), 7.27 – 7.25 (m, 3H, ArH), 7.11 (t,  $J = 7.4$  Hz, 1H, ArH), 7.01 (t,  $J = 7.6$  Hz, 2H, ArH), 6.78 (d,  $J = 7.6$  Hz, 2H, ArH), 4.40 (dd,  $J_1 = 7.0$  Hz,  $J_2 = 2.2$  Hz, 1H, CH), 3.20 (dd,  $J_1 = 15.2$  Hz,  $J_2 = 7.2$  Hz, 1H,  $\text{CH}_2$ ), 2.92 (dd,  $J_1 = 15.2$  Hz,  $J_2 = 2.4$  Hz, 1H,  $\text{CH}_2$ ), 2.43 (s, 3H,  $\text{CH}_3$ ) ppm.  $^{13}\text{C NMR}$  (100 MHz,  $\text{CDCl}_3$ ):  $\delta$  167.9, 145.7, 139.3, 138.1, 135.8, 134.4, 133.8, 129.5, 128.8, 128.7, 128.2, 127.3, 126.4, 124.3, 122.0, 120.1, 117.9, 41.4, 36.4, 21.7 ppm.  $m/z$  calcd. for  $\text{C}_{24}\text{H}_{19}^{79}\text{BrNO}_3\text{S}_2$   $[\text{M} + \text{H}]^+$  511.9984, found 511.9971, calcd. for  $\text{C}_{24}\text{H}_{19}^{81}\text{BrNO}_3\text{S}_2$   $[\text{M} + \text{H}]^+$  513.9964, found 513.9956.

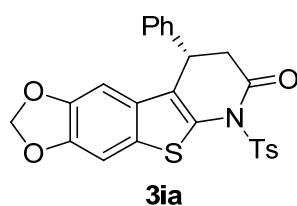

**(S)-9-Phenyl-6-tosyl-8,9-dihydro-[1,3]dioxolo[4'',5'':4',5']benzo[1',2':4,5]thieno[2,3-b]pyridin-7(6H)-one (3ia).** White solid (112.1 mg, 80% yield, 97:3 er), m.p. 126–129 °C. HPLC (Daicel Chiralpak AD-H, *n*-hexane/2-propanol = 60:40, flow rate 1.0 mL/min, detection at 254 nm):  $t_R = 17.3$  (minor),  $t_R = 19.9$  min (major); 97:3 er.  $[\alpha]_D^{25} = +65.7^\circ$  ( $c = 2.57$ , CH<sub>2</sub>Cl<sub>2</sub>). <sup>1</sup>H NMR (400 MHz, CDCl<sub>3</sub>): δ 7.90 (d,  $J = 8.4$  Hz, 2H, ArH), 7.24 (d,  $J = 8.8$  Hz, 2H, ArH), 7.19 (s, 1H, ArH), 7.10 (t,  $J = 7.4$  Hz, 1H, ArH), 7.00 (t,  $J = 7.6$  Hz, 2H, ArH), 6.81 – 6.77 (m, 3H, ArH), 5.98 (d,  $J = 1.2$  Hz, 1H, CH<sub>2</sub>), 5.94 (d,  $J = 0.8$  Hz, 1H, CH<sub>2</sub>), 4.30 (dd,  $J_1 = 7.2$  Hz,  $J_2 = 2.0$  Hz, 1H, CH), 3.19 (dd,  $J_1 = 15.0$  Hz,  $J_2 = 7.0$  Hz, 1H, CH<sub>2</sub>), 2.90 (dd,  $J_1 = 15.0$  Hz,  $J_2 = 2.2$  Hz, 1H, CH<sub>2</sub>), 2.43 (s, 3H, CH<sub>3</sub>) ppm. <sup>13</sup>C NMR (100 MHz, CDCl<sub>3</sub>): δ 168.1, 146.9, 146.4, 145.5, 139.5, 134.5, 133.4, 130.1, 129.4, 128.7, 128.6, 127.1, 126.5, 120.6, 101.35, 101.27, 100.1, 41.5, 36.6, 21.6 ppm. HRMS (ESI):  $m/z$  calcd. for C<sub>25</sub>H<sub>20</sub>NO<sub>5</sub>S<sub>2</sub> [M + H]<sup>+</sup> 478.0777, found 478.0780.

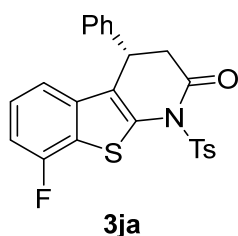

**(S)-8-Fluoro-4-phenyl-1-tosyl-3,4-dihydrobenzo[4,5]thieno[2,3-b]pyridin-2(1H)-one (3ja).** White solid (37.0 mg, 82% yield, 76:24 er), m.p. 212–214 °C. HPLC (Daicel Chiralpak AD-H, *n*-hexane/2-propanol = 85:15, flow rate 1.0 mL/min, detection at 254 nm):  $t_R = 17.8$  (minor),  $t_R = 19.5$  min (major); 76:24 er.  $[\alpha]_D^{25} = +55.5^\circ$  ( $c = 0.73$ , CH<sub>2</sub>Cl<sub>2</sub>). <sup>1</sup>H NMR (400 MHz, CDCl<sub>3</sub>): δ 7.93 (d,  $J = 8.0$  Hz, 2H, ArH), 7.29 – 7.26 (m, 3H, ArH), 7.22 (t,  $J = 7.6$  Hz, 1H, ArH), 7.11 (t,  $J = 7.4$  Hz, 3H, ArH), 6.80 (d,  $J = 7.2$  Hz, 2H, ArH), 4.43 (dd,  $J_1 = 7.2$  Hz,  $J_2 = 2.0$  Hz, 1H, CH), 3.22 (dd,  $J_1 = 15.2$  Hz,  $J_2 = 7.2$  Hz, 1H, CH<sub>2</sub>), 2.95 (dd,  $J_1 = 15.2$  Hz,  $J_2 = 2.4$  Hz, 1H, CH<sub>2</sub>), 2.44 (s, 3H, CH<sub>3</sub>) ppm. <sup>13</sup>C NMR (100 MHz, CDCl<sub>3</sub>): δ 168.0, 157.2 (d,  $^1J_{C-F} = 246.2$  Hz), 145.8, 139.3, 138.2 (d,  $^3J_{C-F} = 4.8$  Hz), 136.6 (d,  $^4J_{C-F} = 1.3$  Hz), 134.5, 129.5, 128.85, 128.77, 127.3, 126.5, 126.3 (d,  $^3J_{C-F} = 7.0$  Hz), 123.5 (d,  $^2J_{C-F} = 17.8$  Hz), 120.8 (d,  $^4J_{C-F} = 2.3$  Hz), 116.7 (d,  $^4J_{C-F} = 3.4$  Hz), 109.4 (d,  $^2J_{C-F} = 18.4$  Hz), 41.4, 36.6, 21.7 ppm. HRMS (ESI):  $m/z$  calcd. for C<sub>24</sub>H<sub>19</sub>FNO<sub>3</sub>S<sub>2</sub> [M + H]<sup>+</sup> 452.0785, found 452.0785.

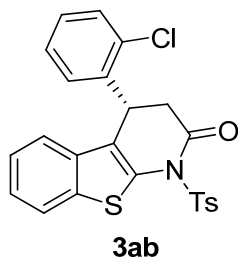

**(R)-4-(2-Chlorophenyl)-1-tosyl-3,4-dihydrobenzo[4,5]thieno[2,3-b]pyridin-2(1H)-one**

**(3ab)**. White solid (44.5 mg, 95% yield, 97:3 er), m.p. 153–154 °C. HPLC (Daicel Chiralpak AD-H, *n*-hexane/2-propanol = 60:40, flow rate 1.0 mL/min, detection at 254 nm):  $t_R$  = 6.8 (minor),  $t_R$  = 8.6 min (major); 97:3 er.  $[\alpha]_D^{25} = +152.5^\circ$  ( $c = 1.94$ , CH<sub>2</sub>Cl<sub>2</sub>). <sup>1</sup>H NMR (400 MHz, CDCl<sub>3</sub>):  $\delta$  8.01 (d,  $J = 8.4$  Hz, 2H, ArH), 7.81 (dd,  $J_1 = 6.8$  Hz,  $J_2 = 1.6$  Hz, 1H, CH<sub>2</sub>), 7.35 – 7.28 (m, 6H, ArH), 7.04 (td,  $J_1 = 7.6$  Hz,  $J_2 = 1.3$  Hz, 1H, ArH), 6.58 (t,  $J = 7.4$  Hz, 1H, ArH), 6.28 (dd,  $J_1 = 7.6$  Hz,  $J_2 = 1.2$  Hz, 1H, ArH), 4.93 (dd,  $J_1 = 7.6$  Hz,  $J_2 = 2.0$  Hz, 1H, CH), 3.20 (dd,  $J_1 = 15.2$  Hz,  $J_2 = 7.6$  Hz, 1H, CH<sub>2</sub>), 2.93 (dd,  $J_1 = 15.2$  Hz,  $J_2 = 2.0$  Hz, 1H, CH<sub>2</sub>), 2.44 (s, 3H, CH<sub>3</sub>) ppm. <sup>13</sup>C NMR (100 MHz, CDCl<sub>3</sub>)  $\delta$  167.9, 145.8, 136.6, 136.3, 134.7, 133.0, 130.1, 129.5, 128.8, 128.7, 127.6, 126.9, 124.9, 124.5, 121.8, 120.7, 118.9, 40.0, 33.4, 21.7 ppm. HRMS (ESI):  $m/z$  calcd. for C<sub>24</sub>H<sub>19</sub>ClNO<sub>3</sub>S<sub>2</sub> [M + H]<sup>+</sup> 468.0489, found 468.0496.

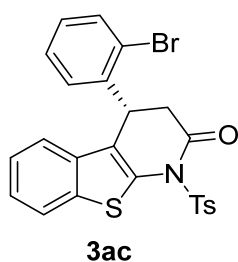

**(R)-4-(2-Bromophenyl)-1-tosyl-3,4-dihydrobenzo[4,5]thieno[2,3-*b*]pyridin-2(1*H*)-one**

**(3ac)**. White solid (46.1 mg, 90% yield, 96:4 er), m.p. 148–149 °C. HPLC (Daicel Chiralpak AD-H, *n*-hexane/2-propanol = 60:40, flow rate 1.0 mL/min, detection at 254 nm):  $t_R$  = 7.0 (minor),  $t_R$  = 9.1 min (major); 96:4 er.  $[\alpha]_D^{25} = +115.5^\circ$  ( $c = 3.06$ , CH<sub>2</sub>Cl<sub>2</sub>). <sup>1</sup>H NMR (400 MHz, CDCl<sub>3</sub>):  $\delta$  8.02 (d,  $J = 8.4$  Hz, 2H, ArH), 7.81 (dd,  $J_1 = 6.2$  Hz,  $J_2 = 1.8$  Hz, 1H, CH<sub>2</sub>), 7.53 (dd,  $J_1 = 8.0$  Hz,  $J_2 = 1.2$  Hz, 1H, CH<sub>2</sub>), 7.34 – 7.28 (m, 5H, ArH), 6.95 (td,  $J_1 = 7.7$  Hz,  $J_2 = 1.6$  Hz, 1H, ArH), 6.61 (td,  $J_1 = 7.6$  Hz,  $J_2 = 1.1$  Hz, 1H, ArH), 6.27 (dd,  $J_1 = 8.0$  Hz,  $J_2 = 1.6$  Hz, 1H, ArH), 4.91 (dd,  $J_1 = 7.6$  Hz,  $J_2 = 1.6$  Hz, 1H, CH), 3.19 (dd,  $J_1 = 15.2$  Hz,  $J_2 = 7.6$  Hz, 1H, CH<sub>2</sub>), 2.93 (dd,  $J_1 = 15.0$  Hz,  $J_2 = 1.8$  Hz, 1H, CH<sub>2</sub>), 2.44 (s, 3H, CH<sub>3</sub>) ppm. <sup>13</sup>C NMR (100 MHz, CDCl<sub>3</sub>)  $\delta$  167.8, 145.8, 137.9, 136.5, 134.70, 134.67, 133.4, 129.6, 129.0, 128.8, 127.7, 127.5, 124.9, 124.5, 123.5, 121.8, 120.7, 119.1, 40.1, 36.0, 21.7 ppm. HRMS (ESI):  $m/z$  calcd. for C<sub>24</sub>H<sub>19</sub><sup>79</sup>Br NO<sub>3</sub>S<sub>2</sub> [M + H]<sup>+</sup> 511.9984, found 511.9985, calcd. for C<sub>24</sub>H<sub>19</sub><sup>81</sup>BrNO<sub>3</sub>S<sub>2</sub> [M + H]<sup>+</sup> 513.9964, found 513.9966.

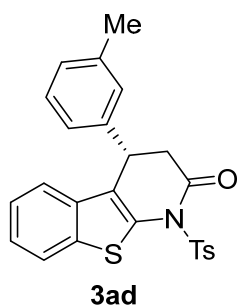

**(S)-4-(*m*-Tolyl)-1-tosyl-3,4-dihydrobenzo[4,5]thieno[2,3-*b*]pyridin-2(1*H*)-one (3ad).** White solid (43.0 mg, 96% yield, 96:4 er), m.p. 85–86 °C. HPLC (Daicel Chiralpak AD-H, *n*-hexane/2-propanol = 60:40, flow rate 1.0 mL/min, detection at 254 nm):  $t_R$  = 9.2 (minor),  $t_R$  = 10.6 min (major); 96:4 er.  $[\alpha]_D^{25} = +74.5^\circ$  ( $c = 3.01$ , CH<sub>2</sub>Cl<sub>2</sub>). <sup>1</sup>H NMR (400 MHz, CDCl<sub>3</sub>):  $\delta$  7.93 (d,  $J = 8.4$  Hz, 2H, ArH), 7.82 – 7.78 (m, 1H, ArH), 7.45 – 7.42 (m, 1H, ArH), 7.32 – 7.28 (m, 2H, ArH), 7.25 (d,  $J = 8.0$  Hz, 2H, ArH), 6.91 – 6.85 (m, 2H, ArH), 6.66 (s, 1H, ArH), 6.58 (d,  $J = 7.2$  Hz, 1H, ArH), 4.40 (dd,  $J_1 = 7.2$  Hz,  $J_2 = 2.0$  Hz, 1H, CH), 3.19 (dd,  $J_1 = 15.2$  Hz,  $J_2 = 7.2$  Hz, 1H, CH<sub>2</sub>), 2.91 (dd,  $J_1 = 15.2$  Hz,  $J_2 = 2.0$  Hz, 1H, CH<sub>2</sub>), 2.41 (s, 3H, CH<sub>3</sub>), 2.08 (s, 3H, CH<sub>3</sub>) ppm. <sup>13</sup>C NMR (100 MHz, CDCl<sub>3</sub>):  $\delta$  168.3, 145.5, 139.7, 138.5, 136.7, 135.3, 135.1, 134.7, 129.5, 128.7, 128.6, 128.0, 127.2, 124.8, 124.3, 123.6, 121.8, 120.8, 120.4, 41.5, 36.4, 21.7, 21.3 ppm. HRMS (ESI):  $m/z$  calcd. for C<sub>25</sub>H<sub>22</sub>NO<sub>3</sub>S<sub>2</sub> [M + H]<sup>+</sup> 448.1036, found 448.1036.

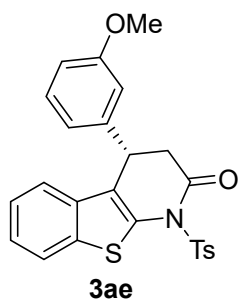

**(S)-4-(3-Methoxyphenyl)-1-tosyl-3,4-dihydrobenzo[4,5]thieno[2,3-*b*]pyridin-2(1*H*)-one (3ae).** White solid (95.8 mg, 82% yield, 96:4 er), m.p. 79–80 °C. HPLC (Daicel Chiralpak AD-H, *n*-hexane/2-propanol = 60:40, flow rate 1.0 mL/min, detection at 254 nm):  $t_R$  = 11.9 (minor),  $t_R$  = 14.3 min (major); 96:4 er.  $[\alpha]_D^{25} = +77.0^\circ$  ( $c = 1.81$ , CH<sub>2</sub>Cl<sub>2</sub>). <sup>1</sup>H NMR (400 MHz, CDCl<sub>3</sub>):  $\delta$  7.91 (d,  $J = 8.0$  Hz, 2H, ArH), 7.81 (dd,  $J_1 = 6.0$  Hz,  $J_2 = 3.2$  Hz, 1H, ArH), 7.45 (dd,  $J_1 = 6.0$  Hz,  $J_2 = 3.2$  Hz, 1H, ArH), 7.31 (dd,  $J_1 = 6.0$  Hz,  $J_2 = 3.2$  Hz, 1H, ArH), 7.24 (d,  $J = 8.8$  Hz, 2H, ArH), 6.91 (t,  $J = 8.0$  Hz, 1H, ArH), 6.64 (dd,  $J_1 = 8.2$  Hz,  $J_2 = 2.2$  Hz, 1H, ArH), 6.50 (t,  $J = 1.8$  Hz, 1H, ArH), 6.37 (d,  $J = 7.6$  Hz, 1H, ArH), 4.42 (dd,  $J_1 = 7.2$  Hz,  $J_2 = 2.0$  Hz, 1H, CH), 3.64 (s, 3H, CH<sub>3</sub>), 3.19 (dd,  $J_1 = 15.2$  Hz,  $J_2 = 7.2$  Hz, 1H, CH<sub>2</sub>), 2.95 (dd,  $J_1 = 15.2$  Hz,  $J_2 = 2.0$  Hz, 1H, CH<sub>2</sub>), 2.42 (s, 3H, CH<sub>3</sub>) ppm. <sup>13</sup>C NMR (100 MHz, CDCl<sub>3</sub>):  $\delta$  168.3, 159.8, 145.5, 141.3, 136.7, 135.5, 135.0, 134.6, 129.8, 129.4, 128.6, 124.8, 124.4, 121.9, 120.8, 120.4, 118.7, 112.7, 112.3, 55.0, 41.3, 36.3, 21.7 ppm. HRMS (ESI):  $m/z$  calcd. for C<sub>25</sub>H<sub>22</sub>NO<sub>4</sub>S<sub>2</sub> [M + H]<sup>+</sup> 464.0985, found 464.0990.

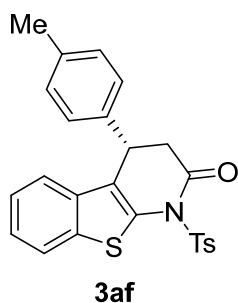

**(S)-4-(*p*-Tolyl)-1-tosyl-3,4-dihydrobenzo[4,5]thieno[2,3-*b*]pyridin-2(1*H*)-one (3af).** White solid (39.8 mg, 89% yield, 96:4 er), m.p. 199–200 °C. HPLC (Daicel Chiralpak IA, *n*-hexane/2-propanol = 95:5, flow rate 1.0 mL/min, detection at 254 nm):  $t_R$  = 25.3 (major),  $t_R$  = 28.0 min (minor); 96:4 er.  $[\alpha]_D^{25} = +84.5^\circ$  ( $c = 1.78$ , CH<sub>2</sub>Cl<sub>2</sub>). <sup>1</sup>H NMR (400 MHz, CDCl<sub>3</sub>): δ 7.90 (d,  $J = 8.4$  Hz, 2H, ArH), 7.81 – 7.78 (m, 1H, ArH), 7.44 – 7.42 (m, 1H, ArH), 7.31 – 7.28 (m, 2H, ArH), 7.25 – 7.23 (m, 2H, ArH), 6.79 (d,  $J = 8.0$  Hz, 2H, ArH), 6.68 (d,  $J = 8.0$  Hz, 2H, ArH), 4.41 (dd,  $J_1 = 6.8$  Hz,  $J_2 = 2.0$  Hz, 1H, CH), 3.15 (dd,  $J_1 = 15.2$  Hz,  $J_2 = 7.2$  Hz, 1H, CH<sub>2</sub>), 2.89 (dd,  $J_1 = 15.0$  Hz,  $J_2 = 2.2$  Hz, 1H, CH<sub>2</sub>), 2.43 (s, 3H, CH<sub>3</sub>), 2.21 (s, 3H, CH<sub>3</sub>) ppm. <sup>13</sup>C NMR (176 MHz, CDCl<sub>3</sub>) δ 168.4, 145.5, 136.75, 136.73, 136.5, 135.3, 135.0, 134.6, 129.41, 129.38, 128.7, 126.4, 124.8, 124.3, 121.8, 120.9, 120.8, 41.6, 36.0, 21.6, 20.9 ppm. HRMS (ESI):  $m/z$  calcd. for C<sub>25</sub>H<sub>22</sub>NO<sub>3</sub>S<sub>2</sub> [M + H]<sup>+</sup> 448.1036, found 448.1034.

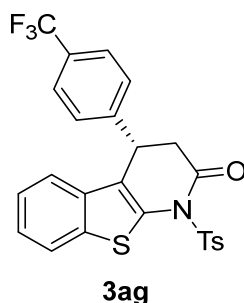

**(S)-1-Tosyl-4-(4-(trifluoromethyl)phenyl)-3,4-dihydrobenzo[4,5]thieno[2,3-*b*]pyridin-2(1*H*)-one (3ag).** Yellow solid (45.6 mg, 91% yield, 96:4 er), m.p. 172–173 °C. HPLC (Daicel Chiralpak AD-H, *n*-hexane/2-propanol = 60:40, flow rate 1.0 mL/min, detection at 254 nm):  $t_R$  = 8.6 (major),  $t_R$  = 9.7 min (minor); 96:4 er.  $[\alpha]_D^{25} = +65.2^\circ$  ( $c = 1.80$ , CH<sub>2</sub>Cl<sub>2</sub>). <sup>1</sup>H NMR (400 MHz, CDCl<sub>3</sub>): δ 7.87 (d,  $J = 8.4$  Hz, 2H, ArH), 7.84 – 7.81 (m, 1H, ArH), 7.46 – 7.44 (m, 1H, ArH), 7.35 – 7.32 (m, 2H, ArH), 7.22 (d,  $J = 8.4$  Hz, 4H, ArH), 6.92 (d,  $J = 8.4$  Hz, 2H, ArH), 4.50 (d,  $J = 6.0$  Hz, 1H, CH), 3.22 (dd,  $J_1 = 15.2$  Hz,  $J_2 = 6.8$  Hz, 1H, CH<sub>2</sub>), 2.95 (dd,  $J_1 = 15.0$  Hz,  $J_2 = 2.2$  Hz, 1H, CH<sub>2</sub>), 2.41 (s, 3H, CH<sub>3</sub>) ppm. <sup>13</sup>C NMR (176 MHz, CDCl<sub>3</sub>): δ 167.9, 145.9, 143.5, 136.9, 136.0, 134.6, 134.4, 129.5, 129.4 (q,  $^2J_{C-F} = 32.4$  Hz), 128.6, 126.9, 125.6, 125.0, 124.6, 123.8 (q,  $^1J_{C-F} = 271.9$  Hz), 122.0, 120.5, 120.0, 41.1, 35.7, 21.4 ppm. HRMS (ESI):  $m/z$  calcd. for C<sub>25</sub>H<sub>18</sub>F<sub>3</sub>NO<sub>3</sub>S<sub>2</sub> [M + H]<sup>+</sup> 502.0753, found 502.0752.

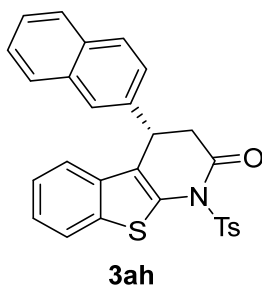

**(S)-4-(Naphthalen-2-yl)-1-tosyl-3,4-dihydrobenzo[4,5]thieno[2,3-*b*]pyridin-2(1*H*)-one**

**(3ah)**. White solid (35.3 mg, 73% yield, 95:5 er), m.p. 180–182 °C. HPLC (Daicel Chiralpak AD-H, *n*-hexane/2-propanol = 60:40, flow rate 1.0 mL/min, detection at 254 nm):  $t_R$  = 12.8 (major),  $t_R$  = 15.1 min (minor); 95:5 er.  $[\alpha]_D^{25}$  = +90.0° ( $c$  = 1.14, CH<sub>2</sub>Cl<sub>2</sub>). <sup>1</sup>H NMR (400 MHz, CDCl<sub>3</sub>): δ 7.85–7.80 (m, 3H, ArH), 7.71–7.69 (m, 1H, ArH), 7.55 (d,  $J$  = 8.4 Hz, 1H, ArH), 7.52–7.49 (m, 1H, ArH), 7.42–7.39 (m, 3H, ArH), 7.34–7.31 (m, 2H, ArH), 7.16 (s, 1H, ArH), 7.07–7.01 (m, 3H, ArH), 4.60 (dd,  $J_1$  = 6.6 Hz,  $J_2$  = 1.8 Hz, 1H, CH), 3.25 (dd,  $J_1$  = 15.2 Hz,  $J_2$  = 6.8 Hz, 1H, CH<sub>2</sub>), 3.09 (dd,  $J_1$  = 15.2 Hz,  $J_2$  = 2.4 Hz, 1H, CH<sub>2</sub>), 2.25 (s, 3H, CH<sub>3</sub>) ppm. <sup>13</sup>C NMR (100 MHz, CDCl<sub>3</sub>) δ 168.4, 145.5, 137.1, 136.9, 135.7, 135.1, 134.5, 133.1, 132.4, 129.3, 128.8, 128.5, 127.8, 127.4, 126.0, 125.9, 125.0, 124.9, 124.5, 122.0, 120.9, 120.8, 41.1, 36.1, 21.6 ppm. HRMS (ESI):  $m/z$  calcd. for C<sub>28</sub>HNO<sub>3</sub>S<sub>2</sub> [M + H]<sup>+</sup> 484.1036, found 484.1034.

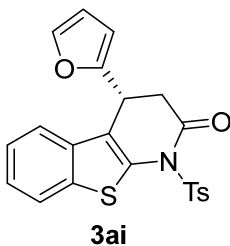

**(R)-4-(Furan-2-yl)-1-tosyl-3,4-dihydrobenzo[4,5]thieno[2,3-*b*]pyridin-2(1*H*)-one** (3ai).

White solid (39.0 mg, 92% yield, 96:4 er), m.p. 149–150 °C HPLC (Daicel Chiralpak AD-H, *n*-hexane/2-propanol = 60:40, flow rate 1.0 mL/min, detection at 254 nm):  $t_R$  = 8.6 (minor),  $t_R$  = 10.6 min (major); 96:4 er.  $[\alpha]_D^{25}$  = +50.1° ( $c$  = 1.64, CH<sub>2</sub>Cl<sub>2</sub>). <sup>1</sup>H NMR (400 MHz, CDCl<sub>3</sub>): δ 7.88 (d,  $J$  = 7.2 Hz, 2H, ArH), 7.79 (d,  $J$  = 8.0 Hz, 1H, ArH), 7.59 (d,  $J$  = 8.0 Hz, 1H, ArH), 7.39–7.31 (m, 2H, ArH), 7.25 (d,  $J$  = 8.0 Hz, 2H, ArH), 6.95 (s, 1H, ArH), 6.00–5.99 (m, 1H, ArH), 5.67 (s, 1H, ArH), 4.46 (d,  $J$  = 6.4 Hz, 1H, CH), 3.11–3.05 (m, 1H, CH<sub>2</sub>), 2.99 (d,  $J$  = 15.2 Hz, 1H, CH<sub>2</sub>), 2.42 (s, 3H, CH<sub>3</sub>) ppm. <sup>13</sup>C NMR (100 MHz, CDCl<sub>3</sub>) δ 168.2, 152.4, 145.4, 142.1, 136.7, 135.6, 134.7, 134.6, 129.3, 128.7, 124.8, 124.4, 121.9, 120.6, 118.7, 110.0, 105.8, 38.6, 30.2, 21.6 ppm. HRMS (ESI):  $m/z$  calcd. for C<sub>22</sub>H<sub>18</sub>NO<sub>4</sub>S<sub>2</sub> [M + H]<sup>+</sup> 424.0672, found 424.0669.

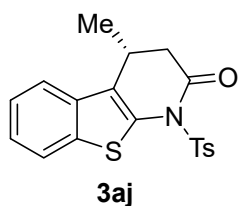

**(R)-4-Methyl-1-tosyl-3,4-dihydrobenzo[4,5]thieno[2,3-*b*]pyridin-2(1*H*)-one (3aj).** White solid (35.3 mg, 95% yield, 98:2 er), m.p. 52–53 °C HPLC (Daicel Chiralpak AD-H, *n*-hexane/2-propanol = 60:40, flow rate 1.0 mL/min, detection at 254 nm):  $t_R = 7.5$  (minor),  $t_R = 8.0$  min (major); 98:2 er.  $[\alpha]_D^{25} = +40.8^\circ$  ( $c = 2.75$ ,  $\text{CH}_2\text{Cl}_2$ ).  $^1\text{H NMR}$  (400 MHz,  $\text{CDCl}_3$ ):  $\delta$  7.94 (d,  $J = 8.0$  Hz, 2H, ArH), 7.79 (d,  $J = 8.0$  Hz, 1H, ArH), 7.56 (d,  $J = 8.0$  Hz, 1H, ArH), 7.38 (t,  $J = 7.4$  Hz, 1H, ArH), 7.34 – 7.29 (m, 3H, ArH), 3.35 – 3.28 (m, 1H, CH), 2.91 (dd,  $J_1 = 15.2$  Hz,  $J_2 = 6.4$  Hz, 1H,  $\text{CH}_2$ ), 2.58 (d,  $J = 15.2$  Hz, 1H,  $\text{CH}_2$ ), 2.41 (s, 3H,  $\text{CH}_3$ ), 1.00 (d,  $J = 7.2$  Hz, 3H,  $\text{CH}_3$ ) ppm.  $^{13}\text{C NMR}$  (100 MHz,  $\text{CDCl}_3$ )  $\delta$  169.3, 145.6, 136.8, 134.9, 134.5, 133.6, 129.4, 128.5, 124.7, 124.2, 123.7, 121.9, 120.2, 40.9, 25.6, 21.7, 19.5 ppm. HRMS (ESI):  $m/z$  calcd. for  $\text{C}_{19}\text{H}_{18}\text{NO}_3\text{S}_2$   $[\text{M} + \text{H}]^+$  372.0723, found 372.0725.

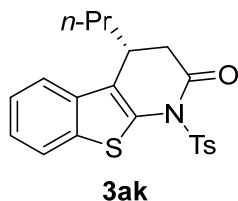

**(R)-4-Propyl-1-tosyl-3,4-dihydrobenzo[4,5]thieno[2,3-*b*]pyridin-2(1*H*)-one (3ak).** White solid (32.8 mg, 82% yield, 98:2 er), m.p. 158–159 °C. HPLC (Daicel Chiralpak IB, *n*-hexane/EtOAc = 60:40, flow rate 1.0 mL/min, detection at 254 nm):  $t_R = 4.2$  (major),  $t_R = 7.2$  min (minor); 98:2 er.  $[\alpha]_D^{25} = +64.5^\circ$  ( $c = 1.73$ ,  $\text{CH}_2\text{Cl}_2$ ).  $^1\text{H NMR}$  (400 MHz,  $\text{CDCl}_3$ ):  $\delta$  7.93 (d,  $J = 8.4$  Hz, 2H, ArH), 7.79 (d,  $J = 7.6$  Hz, 1H, ArH), 7.55 (d,  $J = 7.6$  Hz, 1H, ArH), 7.40 – 7.29 (m, 4H, ArH), 3.20 – 3.15 (m, 1H, CH), 2.85 (dd,  $J_1 = 15.2$  Hz,  $J_2 = 6.4$  Hz, 1H,  $\text{CH}_2$ ), 2.58 (dd,  $J_1 = 15.4$  Hz,  $J_2 = 1.8$  Hz, 1H,  $\text{CH}_2$ ), 2.42 (s, 3H,  $\text{CH}_3$ ) 1.29 – 1.07 (m, 4H,  $\text{CH}_2$ ), 0.70 (t,  $J = 7.0$  Hz,  $\text{CH}_3$ ) ppm.  $^{13}\text{C NMR}$  (100 MHz,  $\text{CDCl}_3$ )  $\delta$  169.6, 145.6, 137.0, 135.2, 134.7, 134.0, 129.4, 128.6, 124.6, 124.2, 123.7, 121.9, 120.7, 39.5, 36.5, 30.7, 21.6, 20.1, 13.8 ppm. HRMS (ESI):  $m/z$  calcd. for  $\text{C}_{21}\text{H}_{22}\text{NO}_3\text{S}_2$   $[\text{M} + \text{H}]^+$  400.1036, found 400.1032.

#### 4. Synthetic procedure and the characterization data of compounds 4–6

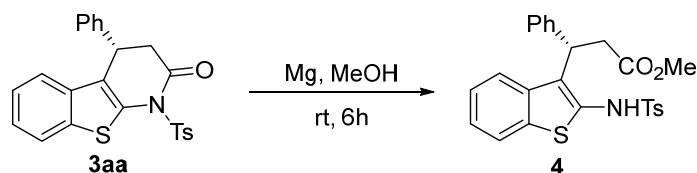

To solution of **3aa** (43.4 mg, 0.1 mmol) in dry MeOH (5 mL) followed by Mg powder (12.0

mg, 0.5 mmol) was added, and the resulting suspension was stirred at room temperature for 6 h. Then the mixture was diluted with CH<sub>2</sub>Cl<sub>2</sub> and filtered. The filtrate was concentrated and purified by flash column chromatography on silica gel (petroleum ether/ethyl acetate = 3:1) to afford compound **4**.

**Methyl (S)-3-(2-((4-methylphenyl)sulfonamido)benzo[*b*]thiophen-3-yl)-3-phenylpropanoate (4)**. White solid (41.9 mg, 90% yield, 96:4 er), m.p. 88–90 °C. HPLC (Daicel Chiralpak AD-H, *n*-hexane/2-propanol = 80:20, flow rate 1.0 mL/min, detection at 254 nm): *t<sub>R</sub>* = 13.3 (major), *t<sub>R</sub>* = 22.8 min (minor); 96:4 er. [ $\alpha$ ]<sub>D</sub><sup>25</sup> = +125.5° (*c* = 1.58, CH<sub>2</sub>Cl<sub>2</sub>). <sup>1</sup>H NMR (400 MHz, CDCl<sub>3</sub>):  $\delta$  8.34 (s, 1H, NH), 7.82 (d, *J* = 8.0 Hz, 2H, ArH), 7.67 (d, *J* = 8.0 Hz, 1H, ArH), 7.20 – 7.16 (m, 3H, ArH), 7.12 – 7.01 (m, 5H, ArH), 6.67 (d, *J* = 7.2 Hz, 2H, ArH), 4.66 (dd, *J*<sub>1</sub> = 11.2 Hz, *J*<sub>2</sub> = 3.6 Hz, 1H, CH<sub>2</sub>), 3.62 (s, 3H, CH<sub>3</sub>), 3.28 (dd, *J*<sub>1</sub> = 16.8 Hz, *J*<sub>2</sub> = 3.6 Hz, 1H, CH<sub>2</sub>), 3.11 (dd, *J*<sub>1</sub> = 16.8 Hz, *J*<sub>2</sub> = 11.2 Hz, 1H, CH<sub>2</sub>), 2.35 (s, 3H, CH<sub>3</sub>) ppm. <sup>13</sup>C NMR (100 MHz, CDCl<sub>3</sub>)  $\delta$  174.1, 144.0, 139.6, 137.3, 136.4, 135.4, 134.8, 129.8, 128.4, 128.2, 127.5, 126.9, 126.5, 124.1, 123.9, 122.7, 122.4, 52.3, 36.9, 35.9, 21.5 ppm. HRMS (ESI): *m/z* calcd. for C<sub>25</sub>H<sub>24</sub>NO<sub>4</sub>S<sub>2</sub> [M + H]<sup>+</sup> 466.1141, found 66.1139.

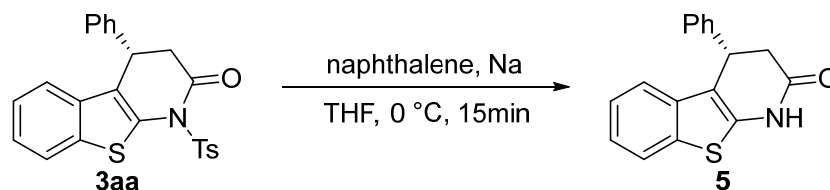

To solution of naphthalene (128.2 mg, 1.0 mmol) in dry THF (5 mL) and cooled to 0 °C under argon atmosphere, Na (23.0 mg, 1.0 mmol) was added, and the resulting suspension was stirred at 0 °C for 1 h, and the solution turned dark green. Then, **3aa** (86.7 mg, 0.2 mmol) was added to the solution and the reaction was stirred at 0 °C for 15 min. Then H<sub>2</sub>O (10 mL) was added and extracted with DCM (3 × 10 mL). The combined organic phase was dried over Na<sub>2</sub>SO<sub>4</sub> and concentrated. The residue was purified by flash column chromatography on silica gel (petroleum ether/ethyl acetate = 4:1 to 2:1) to afford compound **5**.

**(S)-4-Phenyl-3,4-dihydrobenzo[4,5]thieno[2,3-*b*]pyridin-2(1H)-one (5)**. Yellow solid (18.4mg, 33% yield, 95:5 er). m.p. 219–221 °C. HPLC (Daicel Chiralpak AD-H, *n*-hexane/2-propanol = 60:40, flow rate 1.0 mL/min, detection at 254 nm): *t<sub>R</sub>* = 6.7 (major), *t<sub>R</sub>* = 9.4 min (minor); 95:5 er. [ $\alpha$ ]<sub>D</sub><sup>25</sup> = +142.2° (*c* = 1.93, CH<sub>2</sub>Cl<sub>2</sub>). <sup>1</sup>H NMR (400 MHz, CDCl<sub>3</sub>):  $\delta$  8.45 (s, 1H, NH), 7.71 – 7.69 (m, 1H, ArH), 7.30 – 7.28 (m, 2H, ArH), 7.24 – 7.17 (m, 6H, ArH), 4.50 (dd, *J*<sub>1</sub> = 7.8 Hz, *J*<sub>2</sub> = 3.8 Hz, 1H, CH), 3.22 (dd, *J*<sub>1</sub> = 16.4 Hz, *J*<sub>2</sub> = 8.0 Hz, 1H, CH<sub>2</sub>), 2.96 (dd, *J*<sub>1</sub> = 16.4 Hz, *J*<sub>2</sub> = 4.0 Hz, 1H, CH<sub>2</sub>) ppm. <sup>13</sup>C NMR (100 MHz, CDCl<sub>3</sub>)  $\delta$  169.7, 141.6, 137.3, 137.0, 133.8, 129.0, 127.3, 127.0, 125.0, 123.1, 122.5, 120.6, 114.4, 39.5, 37.5 ppm. HRMS (ESI): *m/z* calcd. for C<sub>17</sub>H<sub>14</sub>NOS [M + H]<sup>+</sup> 280.0791, found 280.0789.



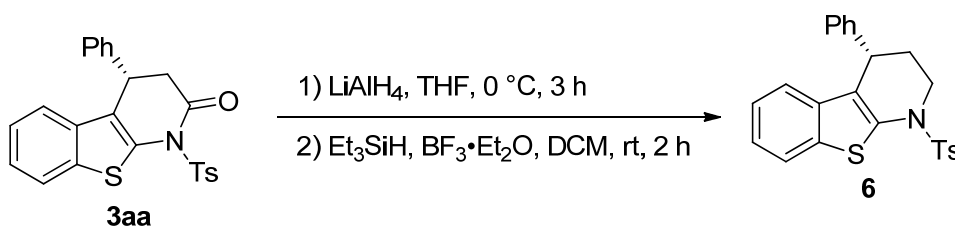

To solution of **3aa** (43.4 mg, 0.1 mmol) in dry THF (5 mL) and cooled to 0 °C under argon atmosphere, LiAlH<sub>4</sub> (0.2 mmol, 7.6 mg) was added, and the resulting suspension was stirred at 0 °C for 3 h. Then quenched with water (10 mL) and extracted with DCM (3 × 10 mL). The combined organic layer was dried over Na<sub>2</sub>SO<sub>4</sub>, filtered, and concentrated. In the next step, the residue was dissolved in dry DCM, Et<sub>3</sub>SiH (23.2 mg, 0.2 mmol) and BF<sub>3</sub>·OEt<sub>2</sub> (21.3 mg, 0.15 mmol) were added. The resulting mixture was stirred at room temperature for 2 h. Then quenched with trace water and concentrated. The residue was purified by flash column chromatography on silica gel (petroleum ether/ethyl acetate = 8:1) to afford compound **6**.

**(S)-4-Phenyl-1-tosyl-1,2,3,4-tetrahydrobenzo[4,5]thieno[2,3-*b*]pyridine (6)**. White solid (34.8 mg, 83% yield, 95:5 er). m.p. 80–82 °C. HPLC (Daicel Chiralpak AD-H, *n*-hexane/2-propanol = 60:40, flow rate 1.0 mL/min, detection at 254 nm): *t*<sub>R</sub> = 5.3 (minor), *t*<sub>R</sub> = 5.7 min (major); 95:5 er. [α]<sub>D</sub><sup>25</sup> = +18.1° (*c* = 1.40, CH<sub>2</sub>Cl<sub>2</sub>). <sup>1</sup>H NMR (400 MHz, CDCl<sub>3</sub>): δ 7.78 (d, *J* = 8.4 Hz, 2H, ArH), 7.65 (d, *J* = 8.0 Hz, 1H, ArH), 7.16 – 7.12 (m, 3H, ArH), 7.10 – 7.05 (m, 3H, ArH), 6.98 – 6.96 (m, 2H, ArH), 6.67 (dd, *J*<sub>1</sub> = 7.0 Hz, *J*<sub>2</sub> = 1.4 Hz, 2H, ArH), 4.43 (dd, *J*<sub>1</sub> = 12.4 Hz, *J*<sub>2</sub> = 4.4 Hz, 1H, CH), 3.89 – 3.85 (m, 1H, CH<sub>2</sub>), 3.21 (td, *J* = 11.4 Hz, *J*<sub>2</sub> = 2.7 Hz, 1H, CH<sub>2</sub>), 2.59 – 2.51 (m, 1H, CH<sub>2</sub>), 2.33 (s, 3H, CH<sub>3</sub>), 2.17 – 2.10 (m, 1H, CH<sub>2</sub>) ppm. <sup>13</sup>C NMR (100 MHz, CDCl<sub>3</sub>) δ 144.1, 141.4, 137.4, 136.1, 135.7, 134.7, 129.9, 128.4, 128.0, 127.5, 127.2, 126.0, 124.0, 123.7, 123.1, 122.3, 60.1, 36.7, 32.2, 21.5 ppm. HRMS (ESI): *m/z* calcd. for C<sub>24</sub>H<sub>22</sub>NO<sub>2</sub>S<sub>2</sub> [M + H]<sup>+</sup> 420.1086, found 420.1028.

## 5. Crystal data and structure refinement

### Crystal data and structure refinement for 3fa

|                                             |                                                                |
|---------------------------------------------|----------------------------------------------------------------|
| Identification code                         | 1_a (CCDC 2180150)                                             |
| Empirical formula                           | C <sub>25</sub> H <sub>21</sub> NO <sub>3</sub> S <sub>2</sub> |
| Formula weight                              | 447.55                                                         |
| Temperature/K                               | 296(2)                                                         |
| Wavelength/Å                                | 0.71073                                                        |
| Crystal system                              | Orthorhombic                                                   |
| Space group                                 | P2 <sub>1</sub> 2 <sub>1</sub> 2 <sub>1</sub>                  |
| a/Å                                         | 6.4600(17)                                                     |
| b/Å                                         | 13.975(4)                                                      |
| c/Å                                         | 24.315(6)                                                      |
| $\alpha$ /°                                 | 90                                                             |
| $\beta$ /°                                  | 90                                                             |
| $\gamma$ /°                                 | 90                                                             |
| Volume/Å <sup>3</sup>                       | 2195.2(10)                                                     |
| Z                                           | 4                                                              |
| $\rho_{\text{calc}}/\text{cm}^3$            | 1.354                                                          |
| $\mu/\text{mm}^{-1}$                        | 0.270                                                          |
| F(000)                                      | 936                                                            |
| Crystal size/mm <sup>3</sup>                | 0.200 × 0.200 × 0.200                                          |
| Completeness to theta = 25.117°             | 99.7 %                                                         |
| $\Theta$ range for data collection/°        | 2.905 to 25.117                                                |
| Index ranges                                | -7 ≤ h ≤ 6, -16 ≤ k ≤ 16, -26 ≤ l ≤ 28                         |
| Reflections collected                       | 25109                                                          |
| Independent reflections                     | 3905 [R <sub>(int)</sub> = 0.1295]                             |
| Data/restraints/parameters                  | 3905/0/246                                                     |
| Goodness-of-fit on F <sup>2</sup>           | 1.004                                                          |
| Final R indexes [I ≥ 2σ (I)]                | R <sub>1</sub> = 0.0639, wR <sub>2</sub> = 0.1316              |
| Final R indexes [all data]                  | R <sub>1</sub> = 0.1646, wR <sub>2</sub> = 0.1811              |
| Largest diff. peak/hole / e Å <sup>-3</sup> | 0.233/-0.318                                                   |
| Absolute structure parameter                | -0.10(8)                                                       |

## 6. Reference

- [1] E. R. T. Robinson, C. Fallan, C. Simal, A. M. Z. Slawin and A. D. Smith, Anhydrides as  $\alpha$ ,  $\beta$ -unsaturated acyl ammonium precursors: isothioureia-promoted catalytic asymmetric annulation processes, *Chem. Sci.*, 2013, **4**, 2193-2200. b) E. R. T. Robinson, D. M. Walden, C. Fallan, M. D. Greenhalgh, P. H.-Y. Cheong and A. D. Smith, Non-bonding 1,5-S...O interactions govern chemo- and enantioselectivity in isothioureia-catalyzed annulations of benzazoles, *Chem. Sci.*, 2016, **7**, 6919-6927.
- [2] a) L. C. Morrill, J. Douglas, T. Lebl, A. M. Z. Slawin, D. J. Fox and A. D. Smith, Isothioureia-mediated asymmetric Michael-lactonisation of trifluoromethylenones: a synthetic and mechanistic study, *Chem. Sci.*, 2013, **4**, 4146-4155. b) Y. Fukata, K. Asano and S. Matsubara, Facile net cycloaddition approach to optically active 1,5-benzothiazepines, *J. Am. Chem. Soc.*, 2015, **137**, 5320-5323. c) N. R. Guha, R. M. Neyyappadath, M. D. Greenhalgh, R. Chisholm, S. M. Smith, M. L. McEvoy, C. M. Young, C. Rodríguez-Esrich, M. A. Pericàs, G. Hähner and A. D. Smith, Evaluating polymer-supported isothioureia catalysis in industrially-preferable solvents for the acylative kinetic resolution of secondary and tertiary heterocyclic alcohols in batch and flow, *Green Chem.*, 2018, **20**, 4537-4546.
- [3] a) C. Galvez, F. Garcia, M. Veiga and P. Viladoms, A convenient preparation of haloaminobenzo[*b*]thiophene derivatives, *Synthesis-Stuttgart*, 1983, 932-933. b) J. K. Augustine, A. Bombrun, A. B. Mandal, P. Alagarsamy, R. N. Atta and P. Selvam, Propylphosphonic anhydride (T3P<sup>®</sup>)-mediated one-pot rearrangement of carboxylic acids to carbamates, *Synthesis-Stuttgart*, 2011, 1477-1483.
- [4] H. Liu, A. M. Z. Slawin and A. D. Smith, Isothioureia-Catalyzed Enantioselective Synthesis of Tetrahydro- $\alpha$ -carbolinones, *Org. Lett.*, 2020, **22**, 1301-1305.

### 7. Copies of $^1\text{H}$ and $^{13}\text{C}$ NMR spectra of new compounds

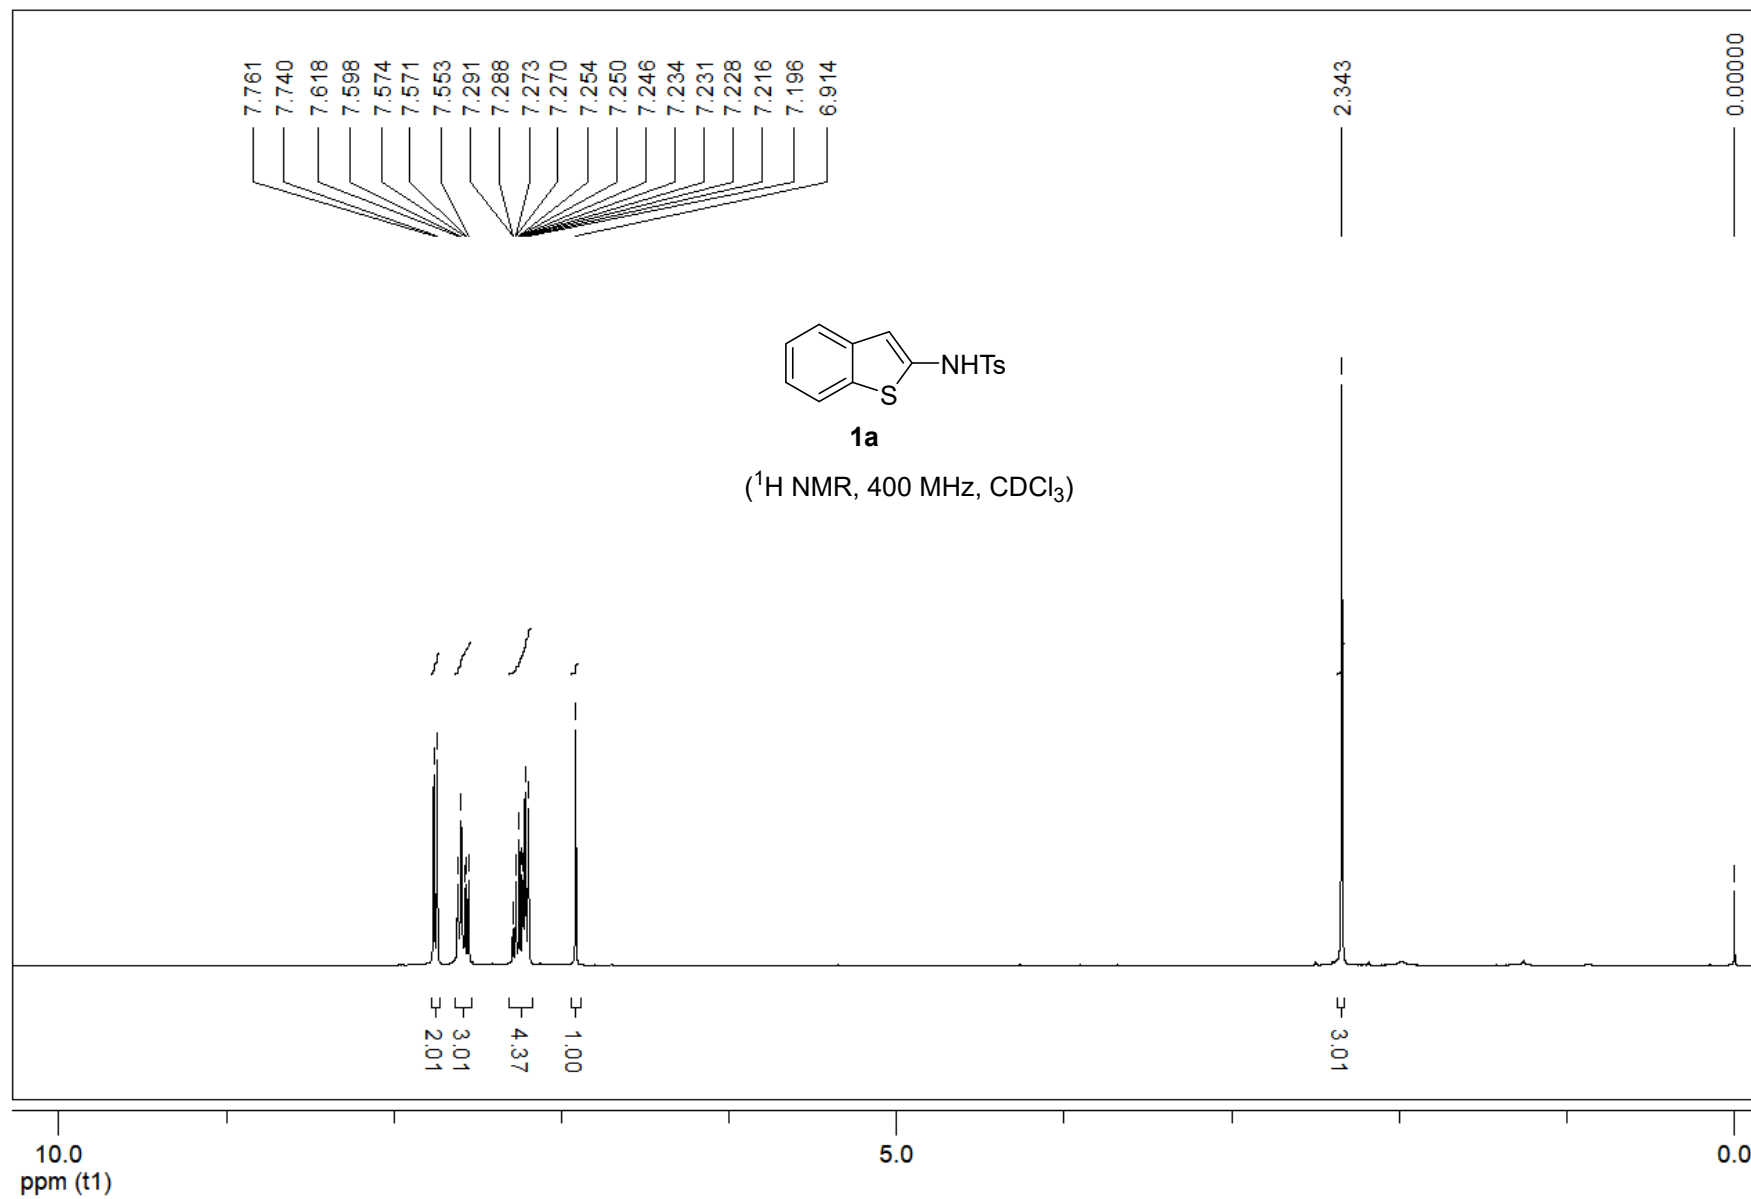

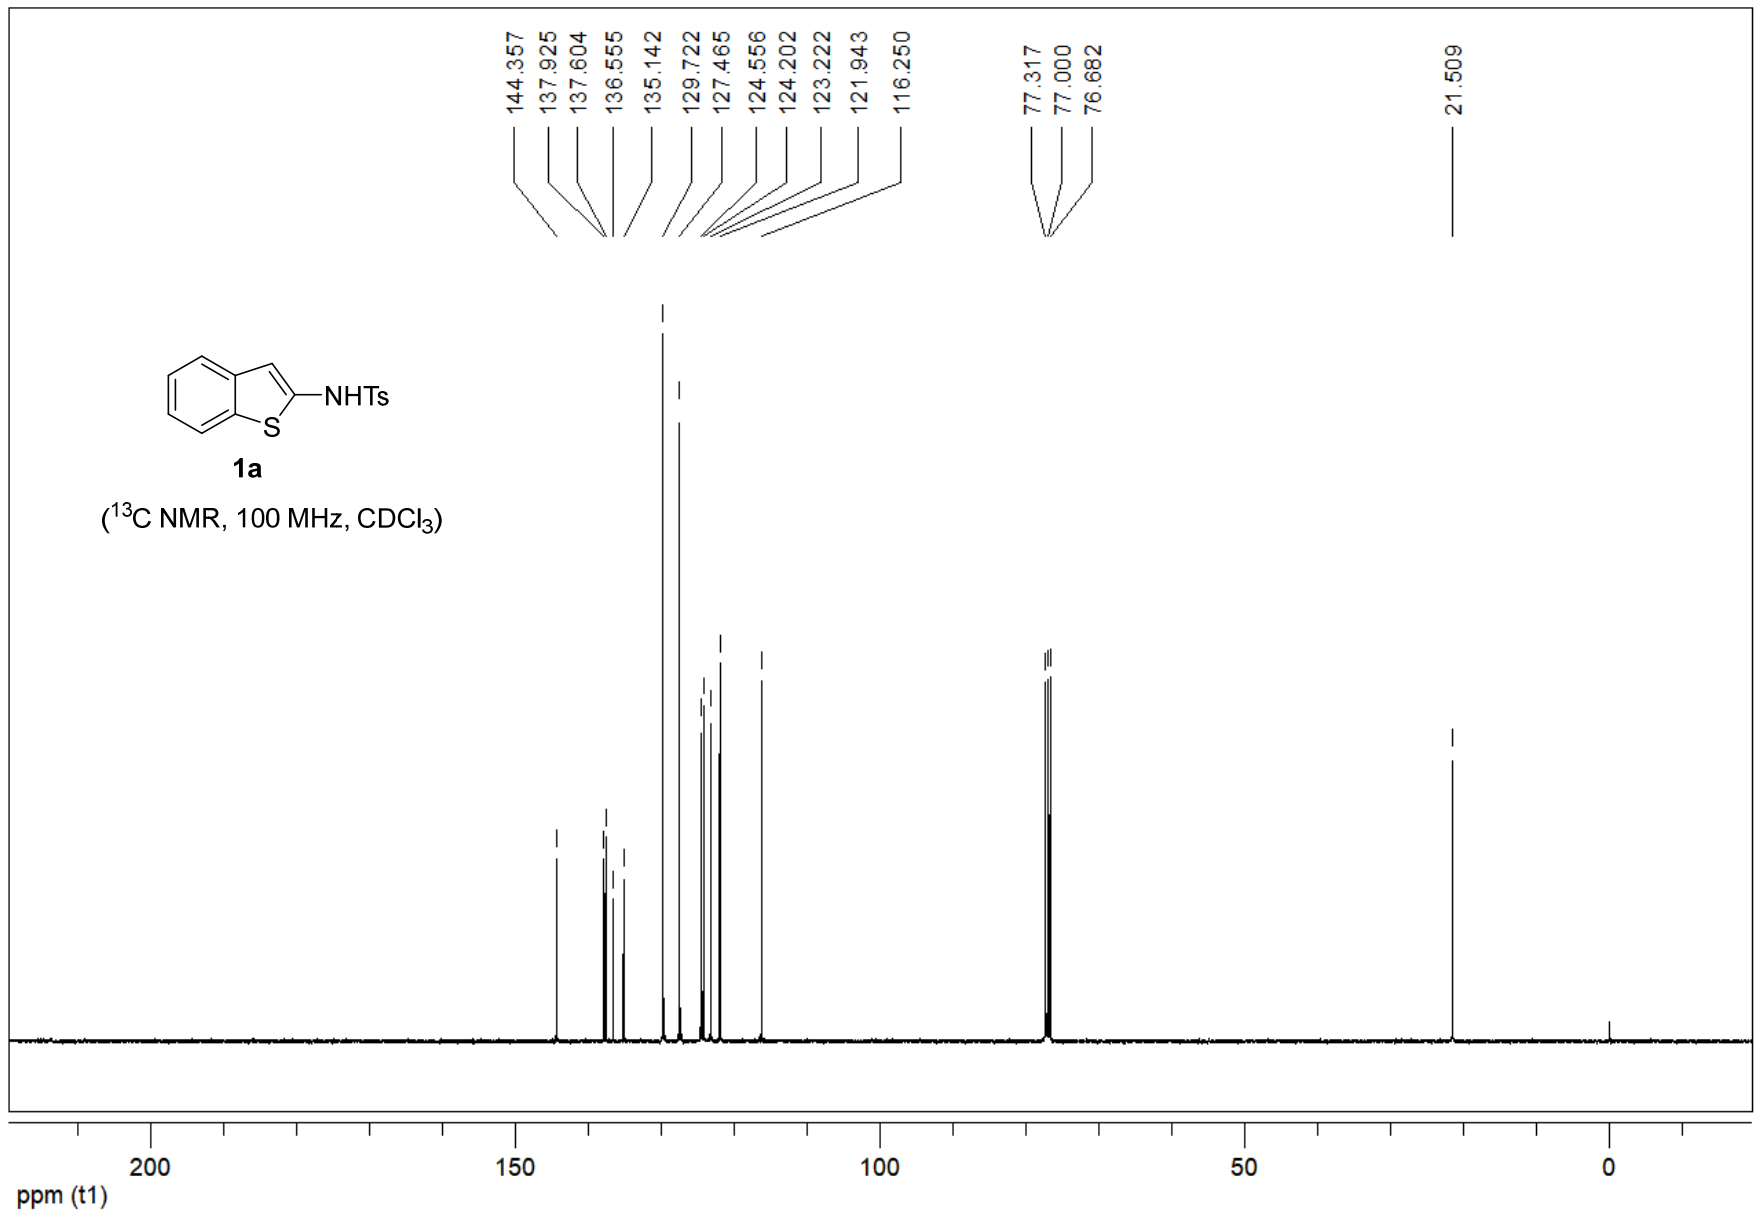

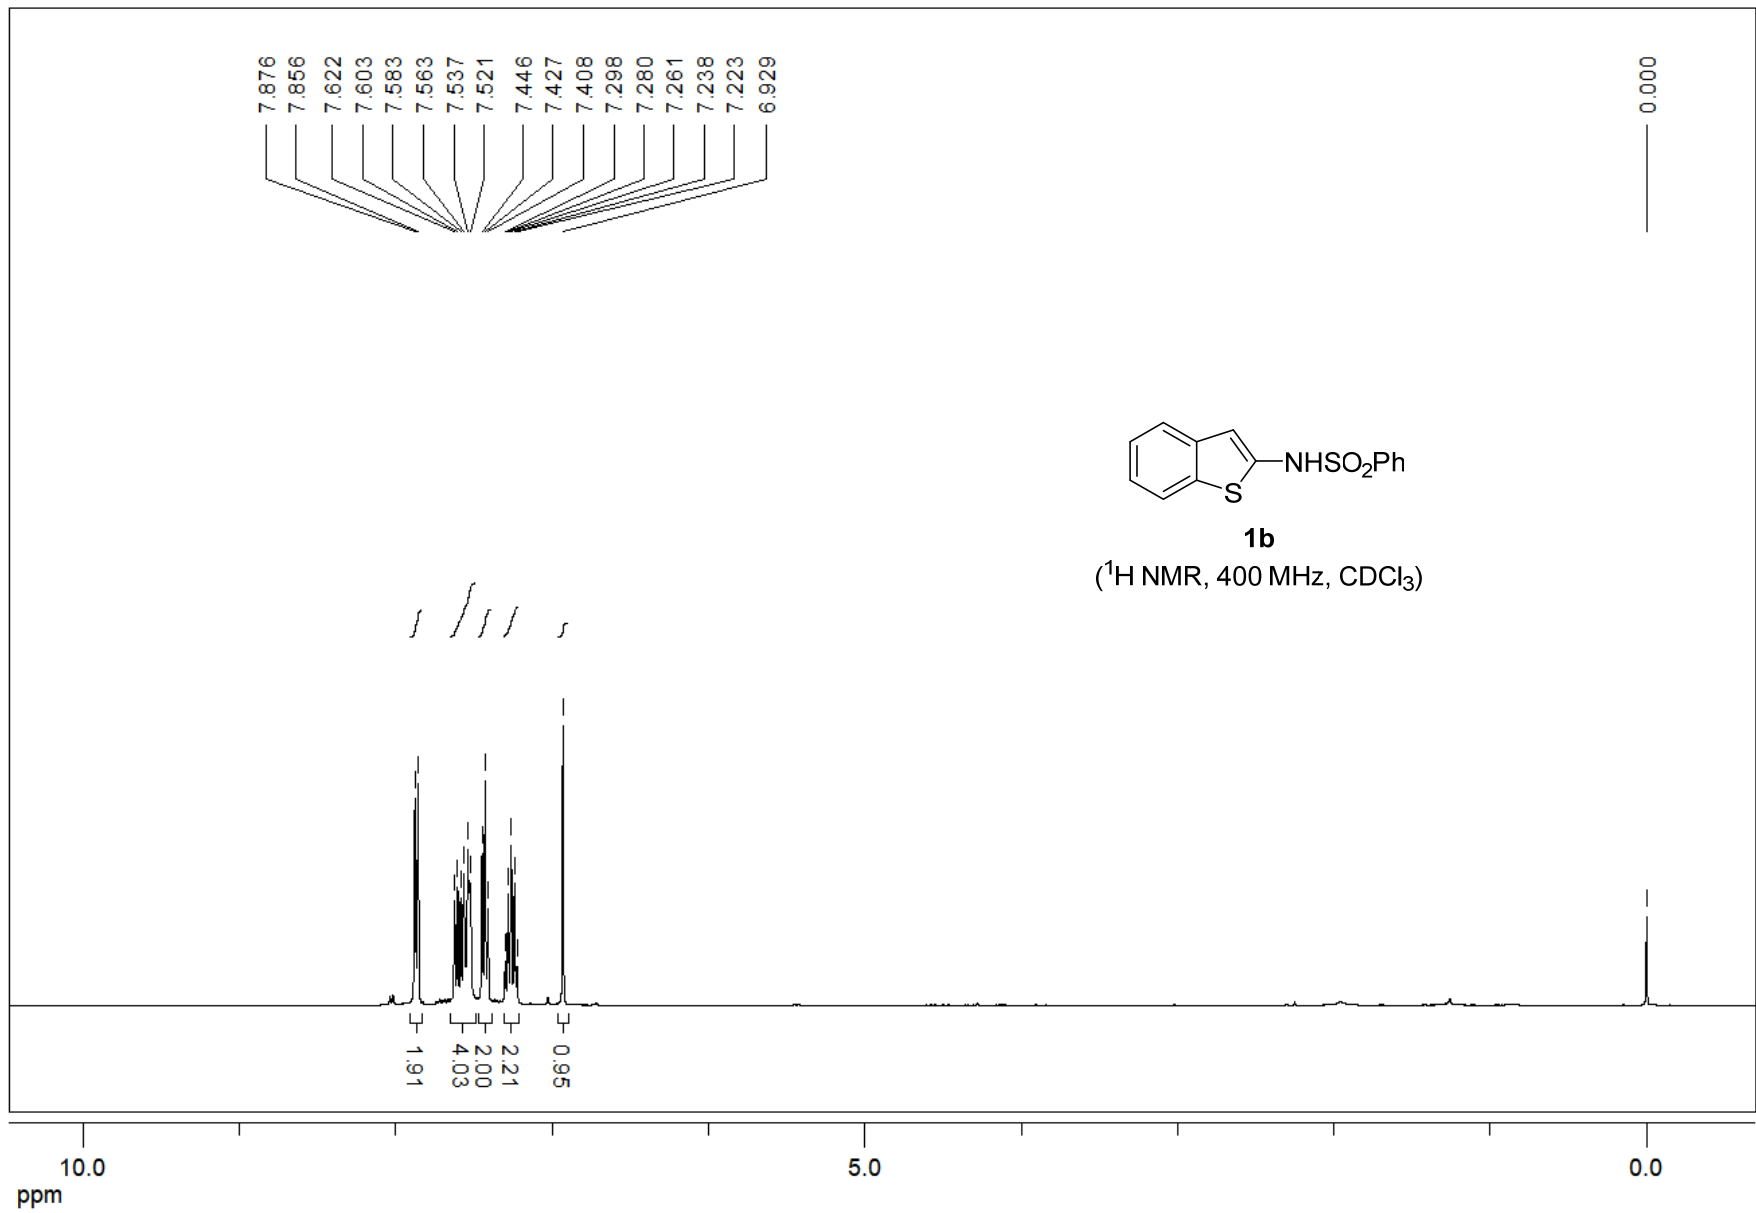

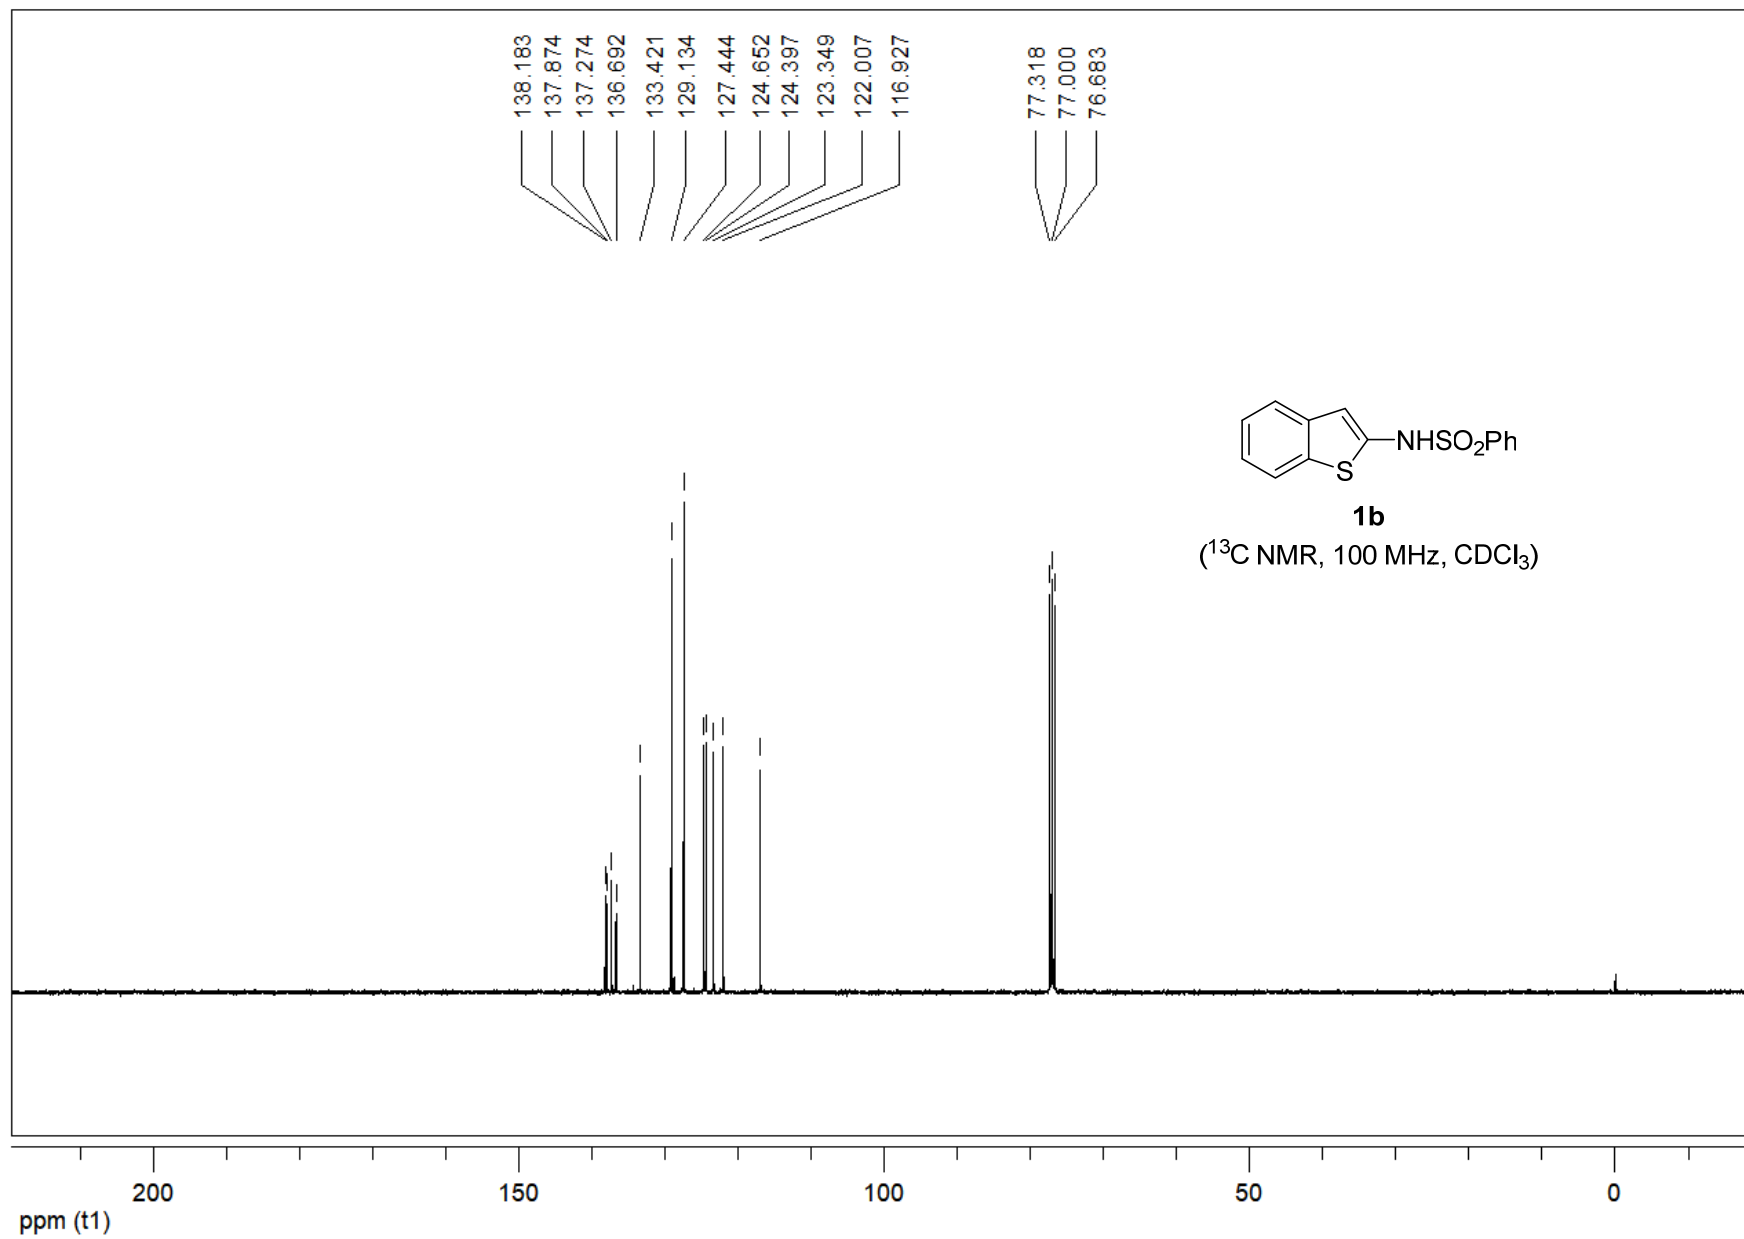

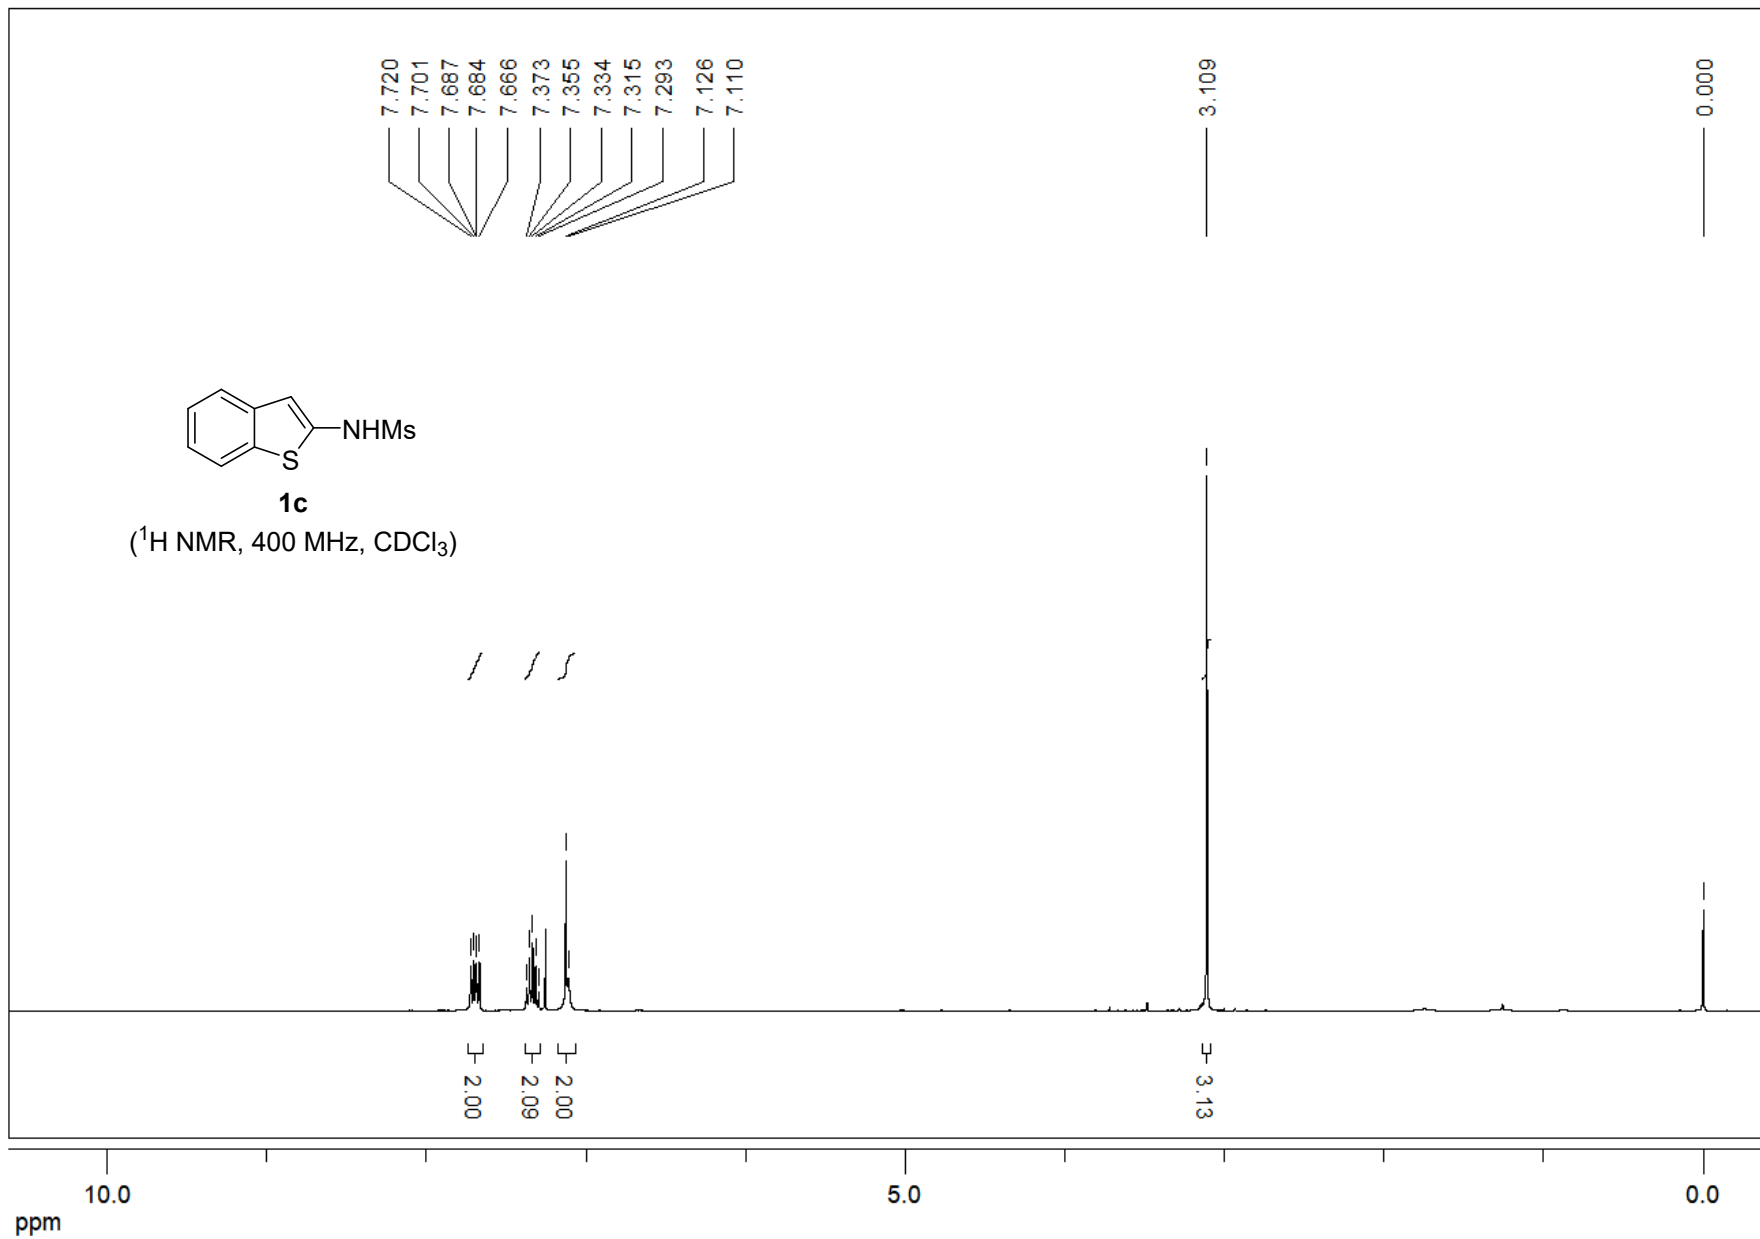



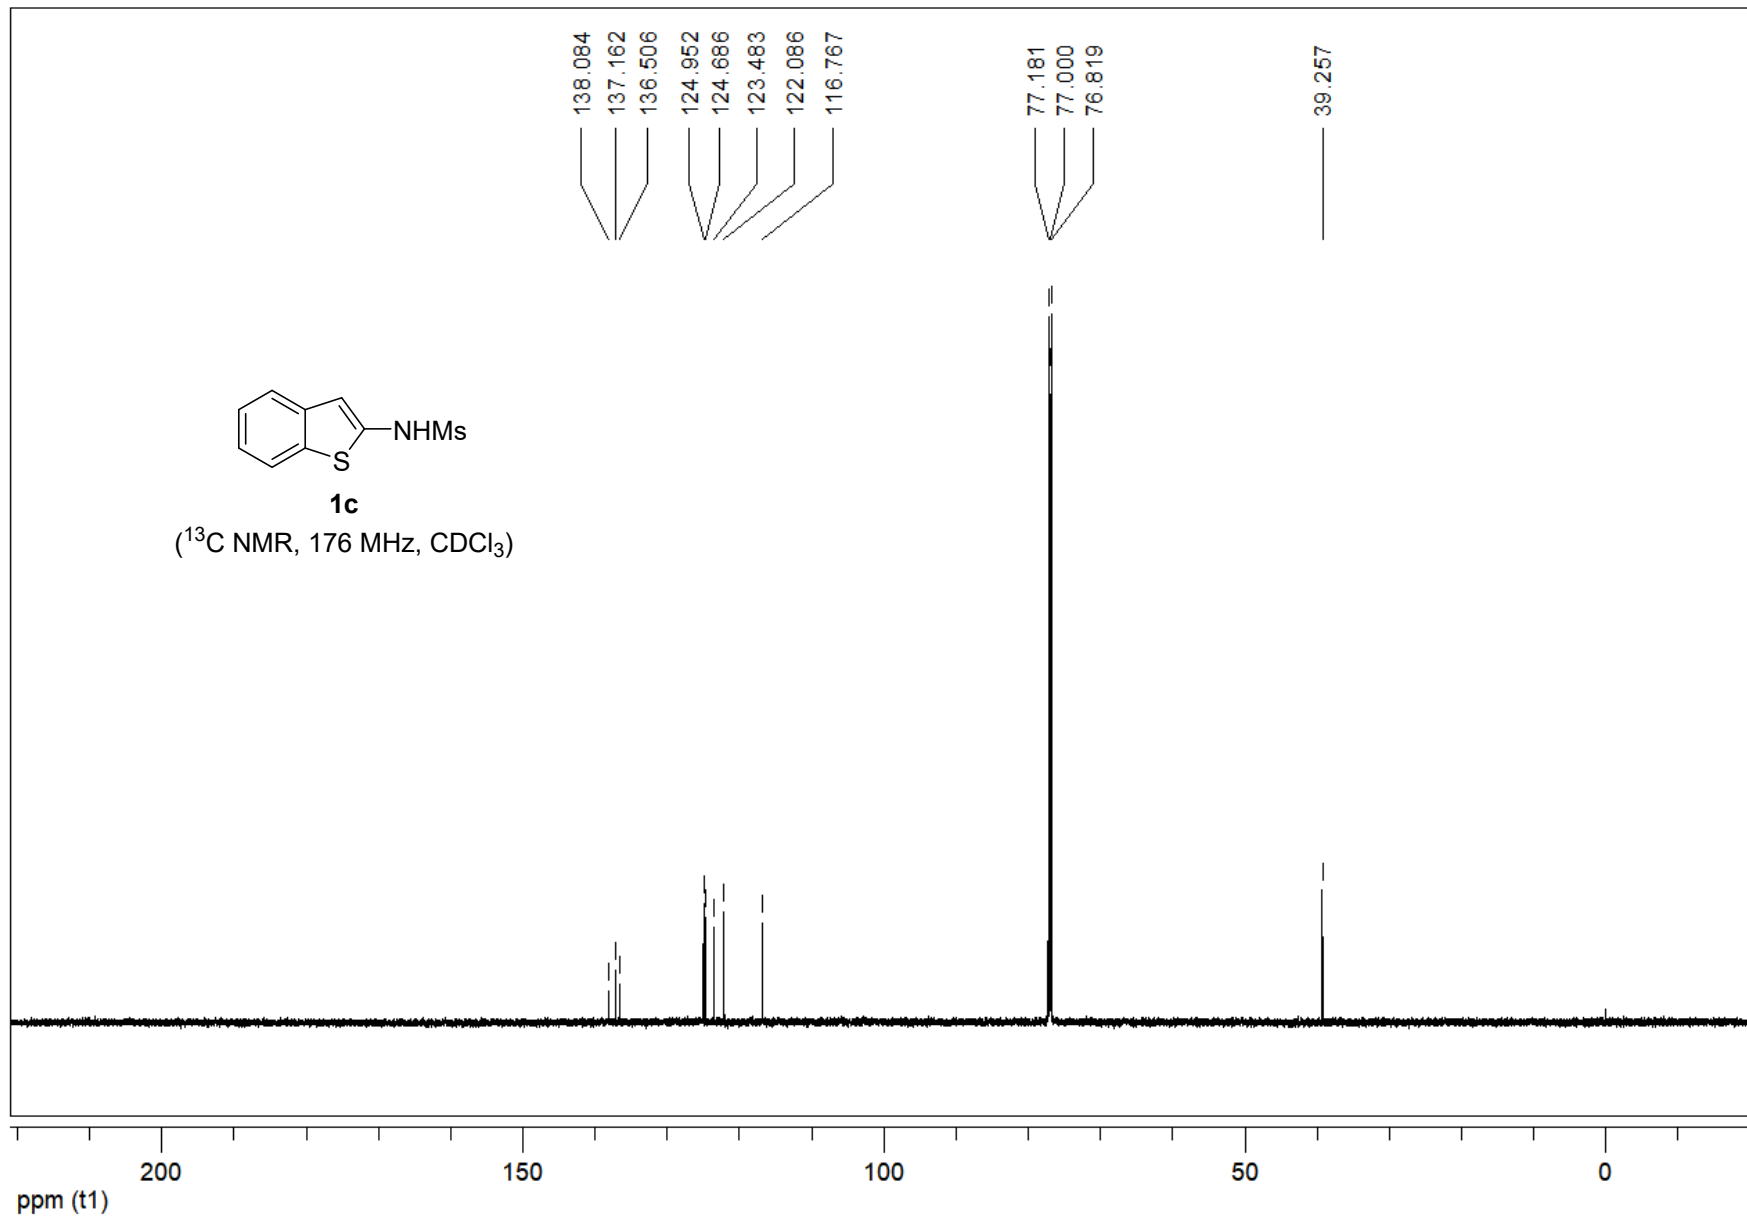

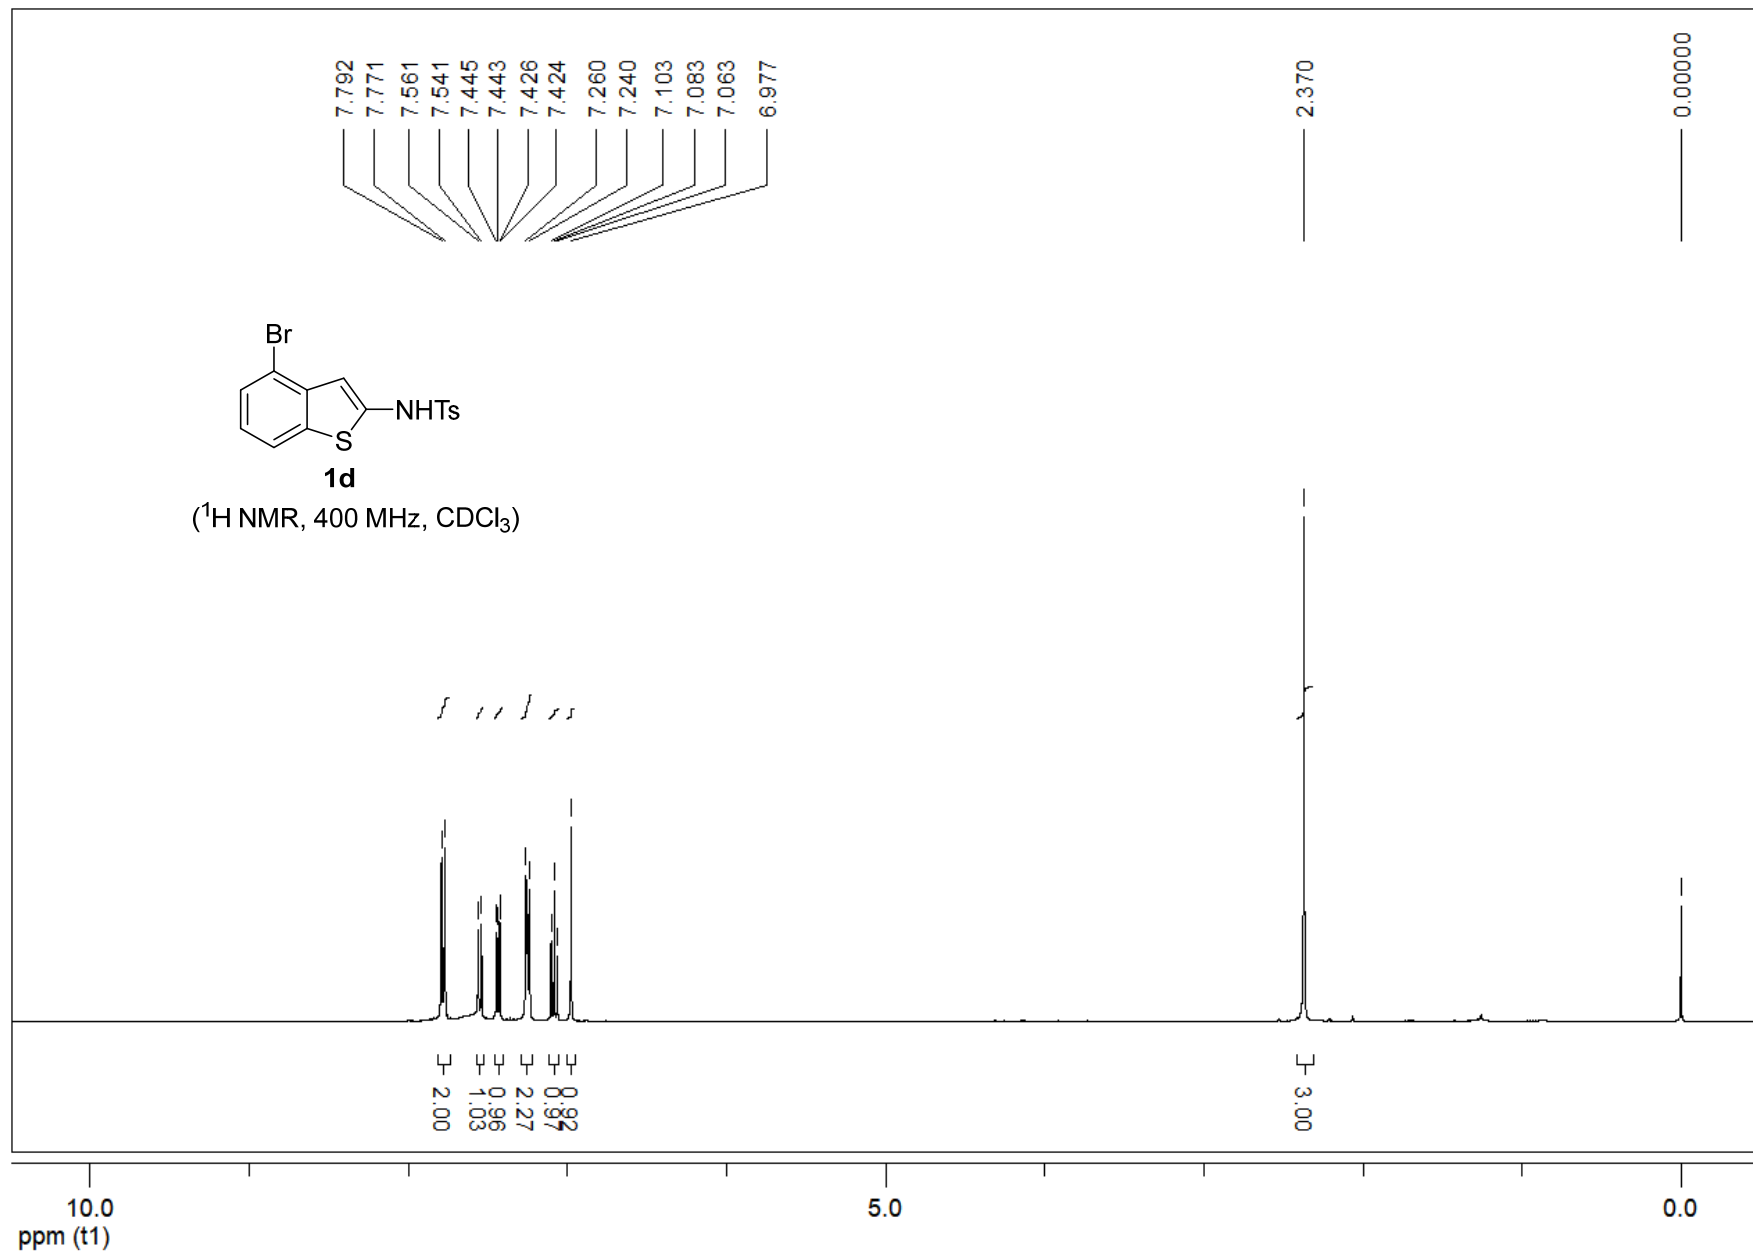

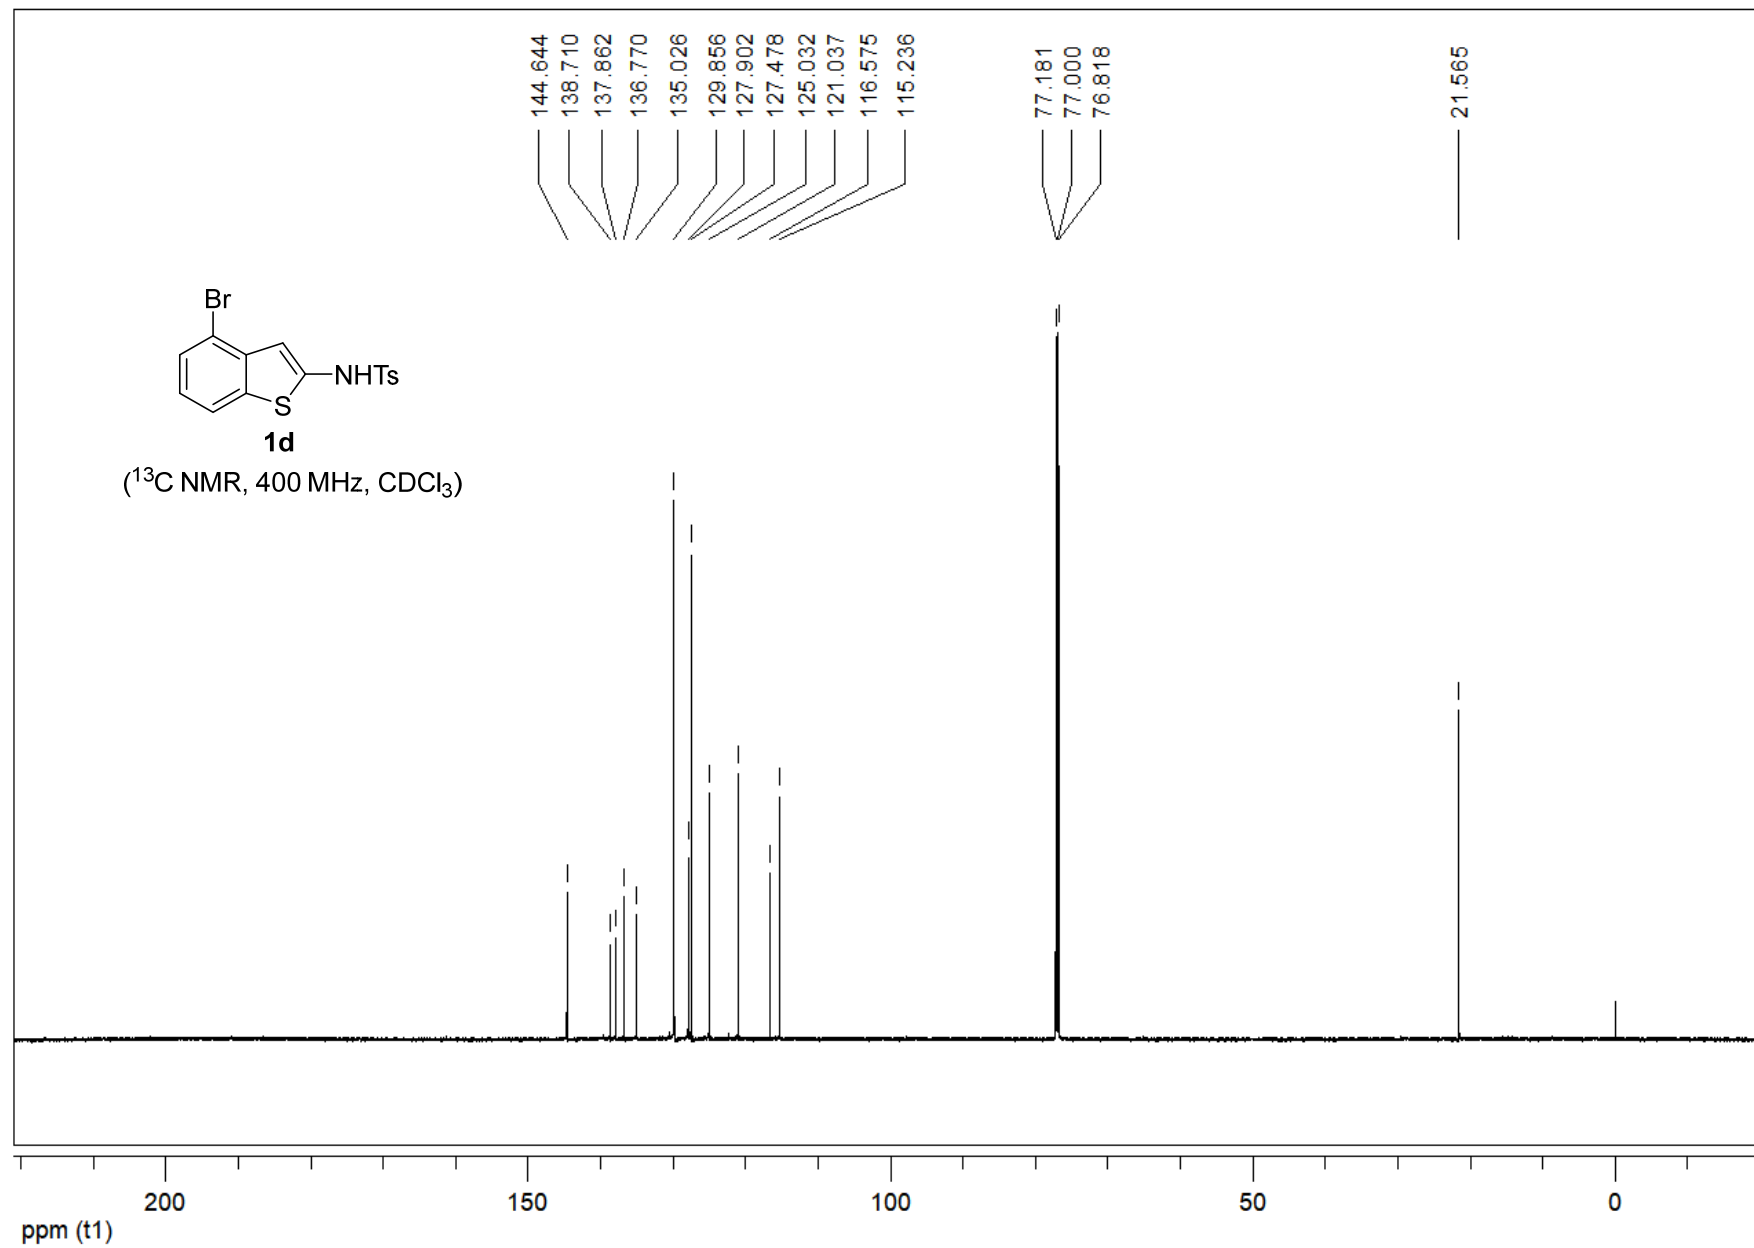

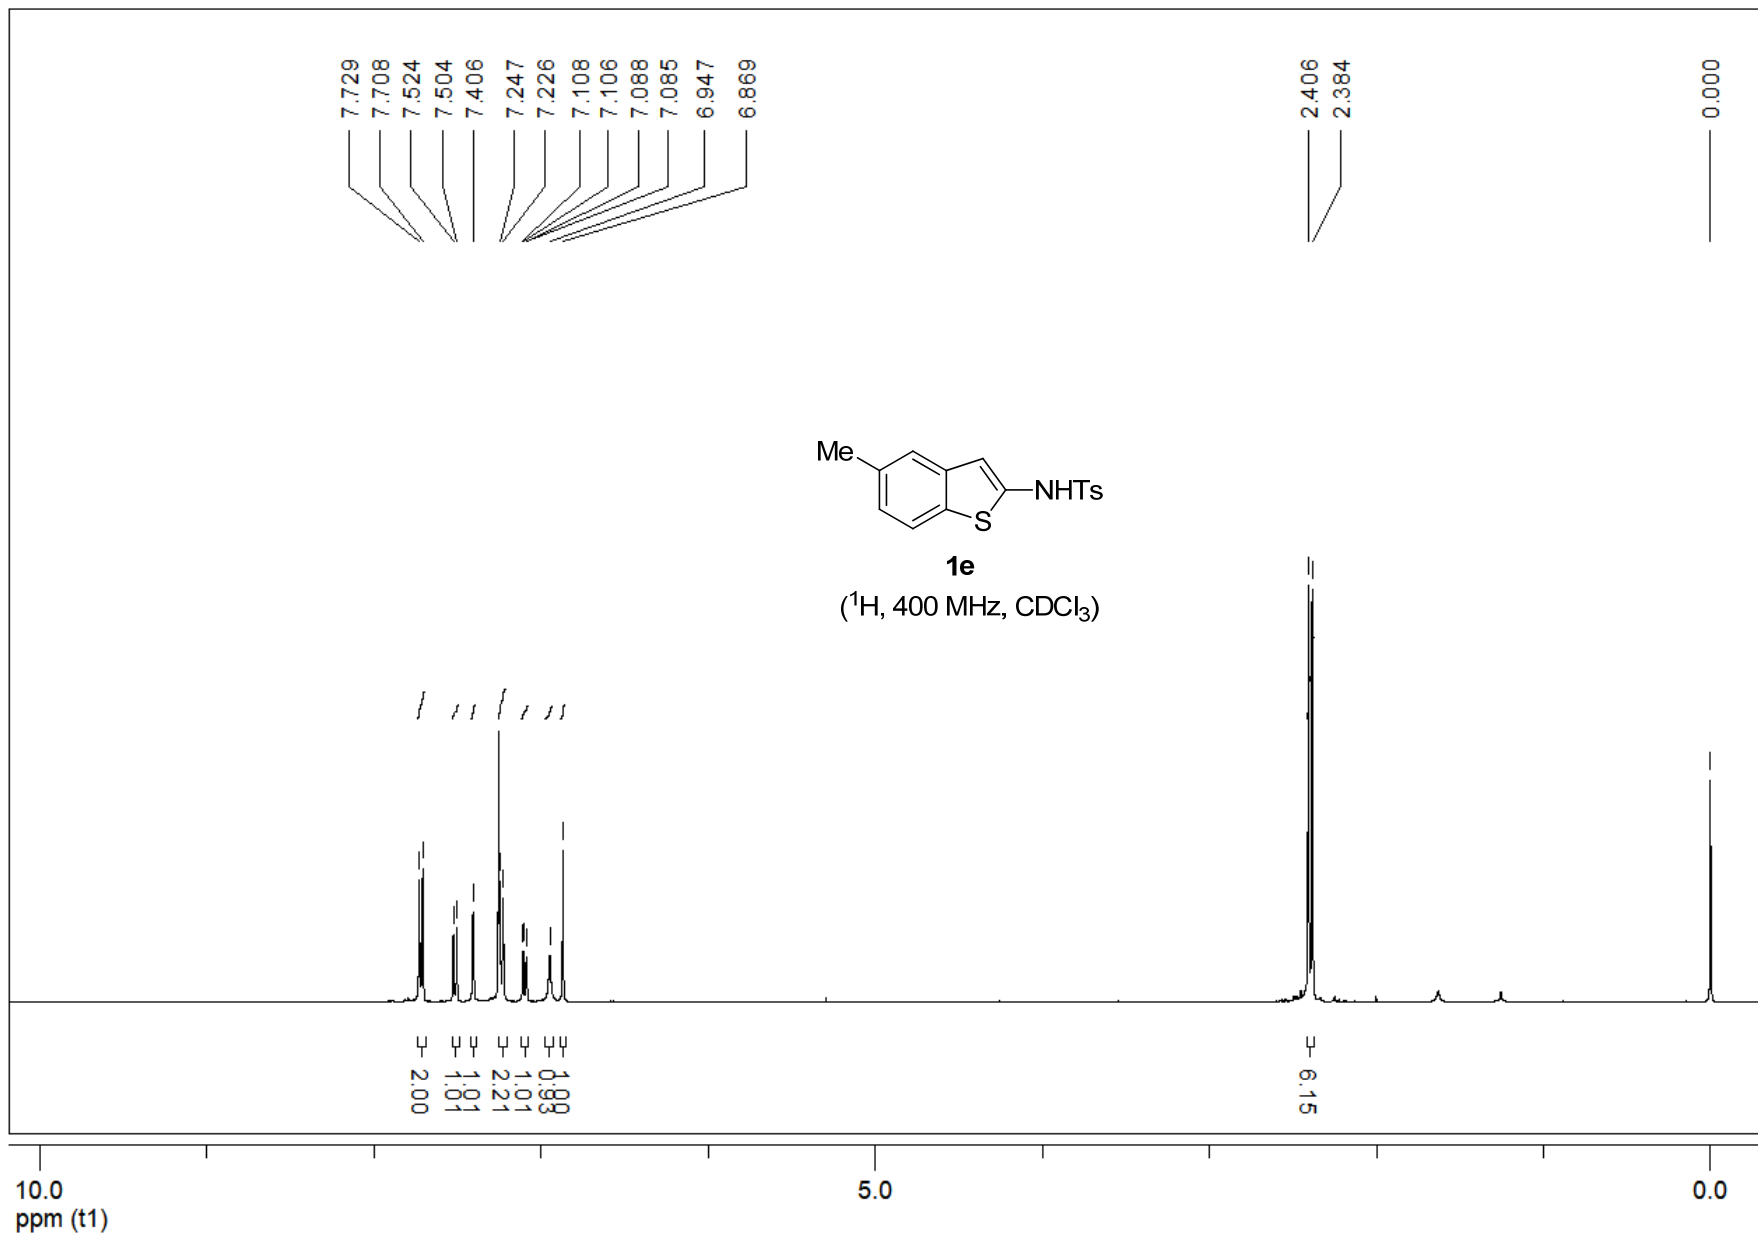

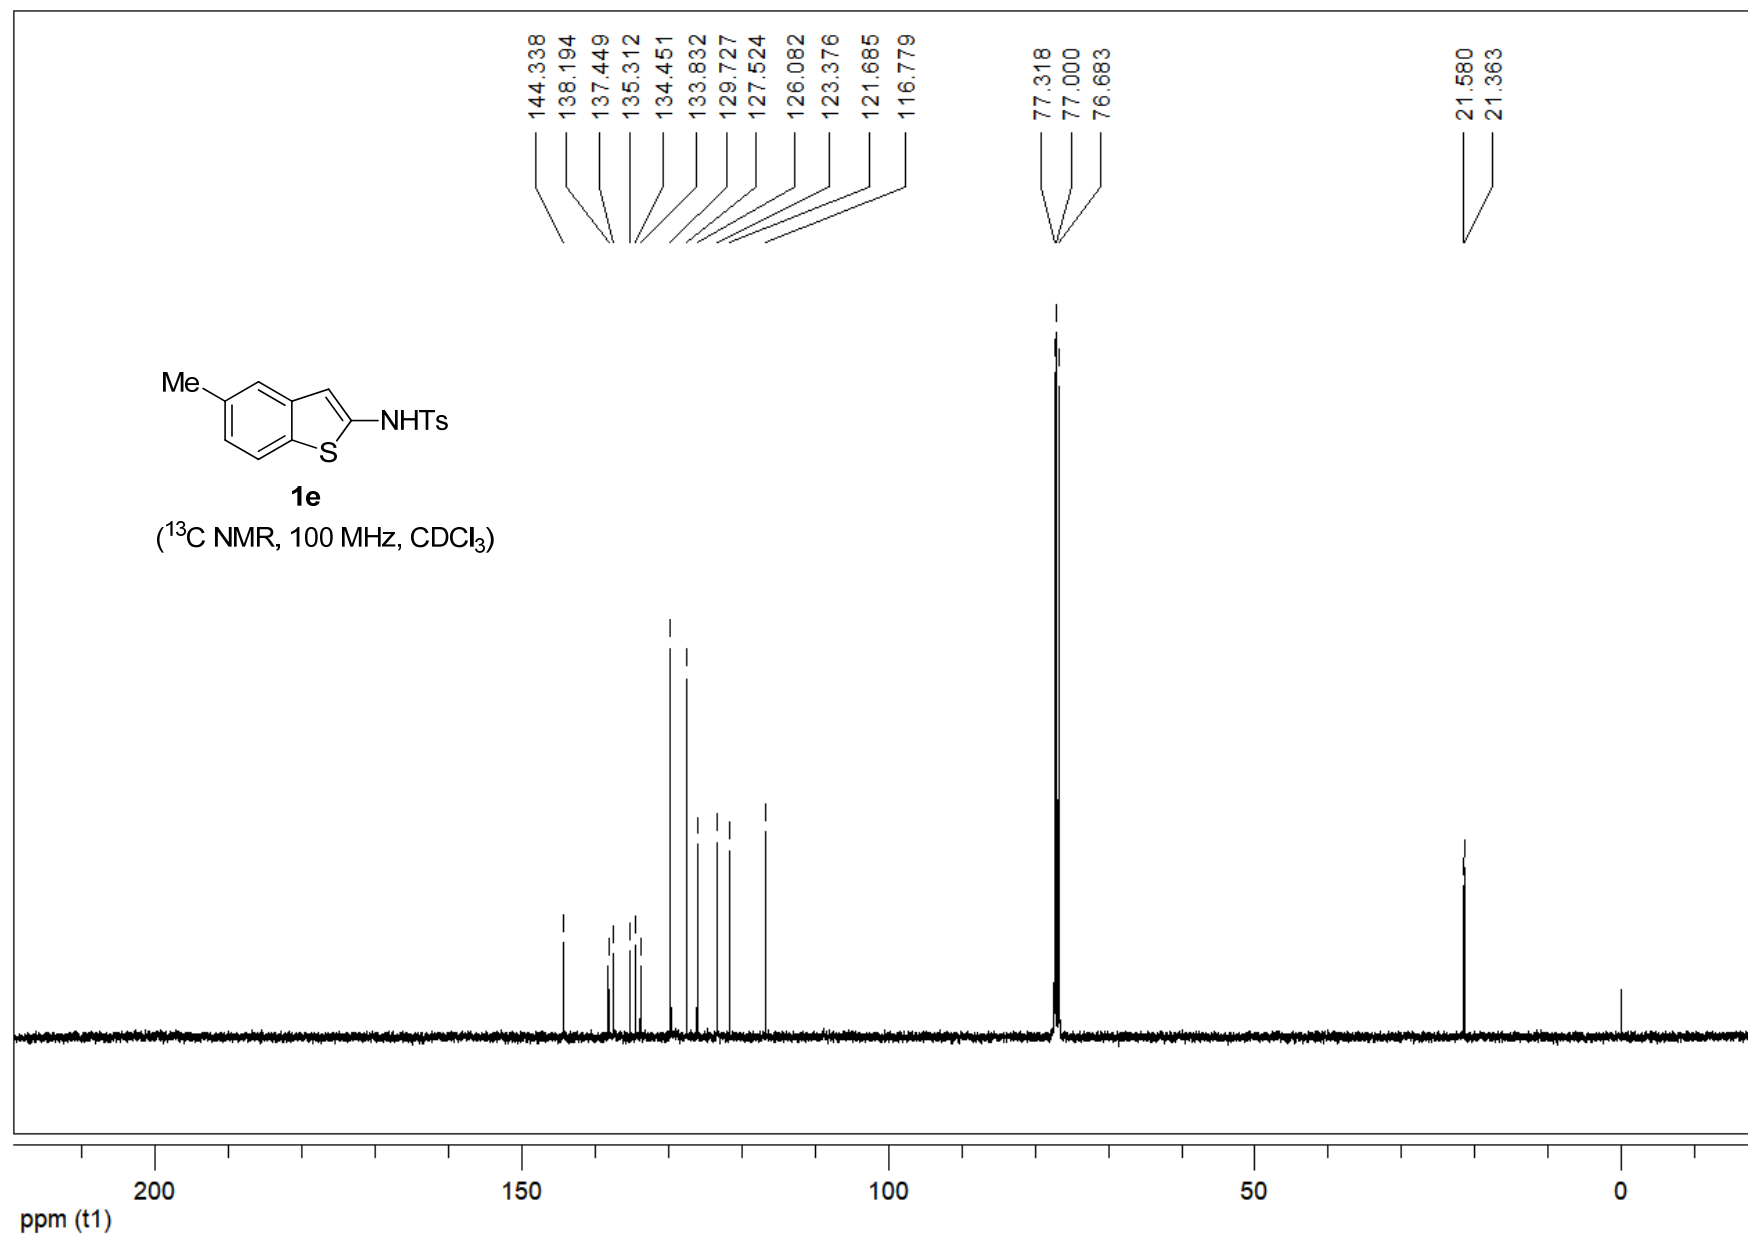

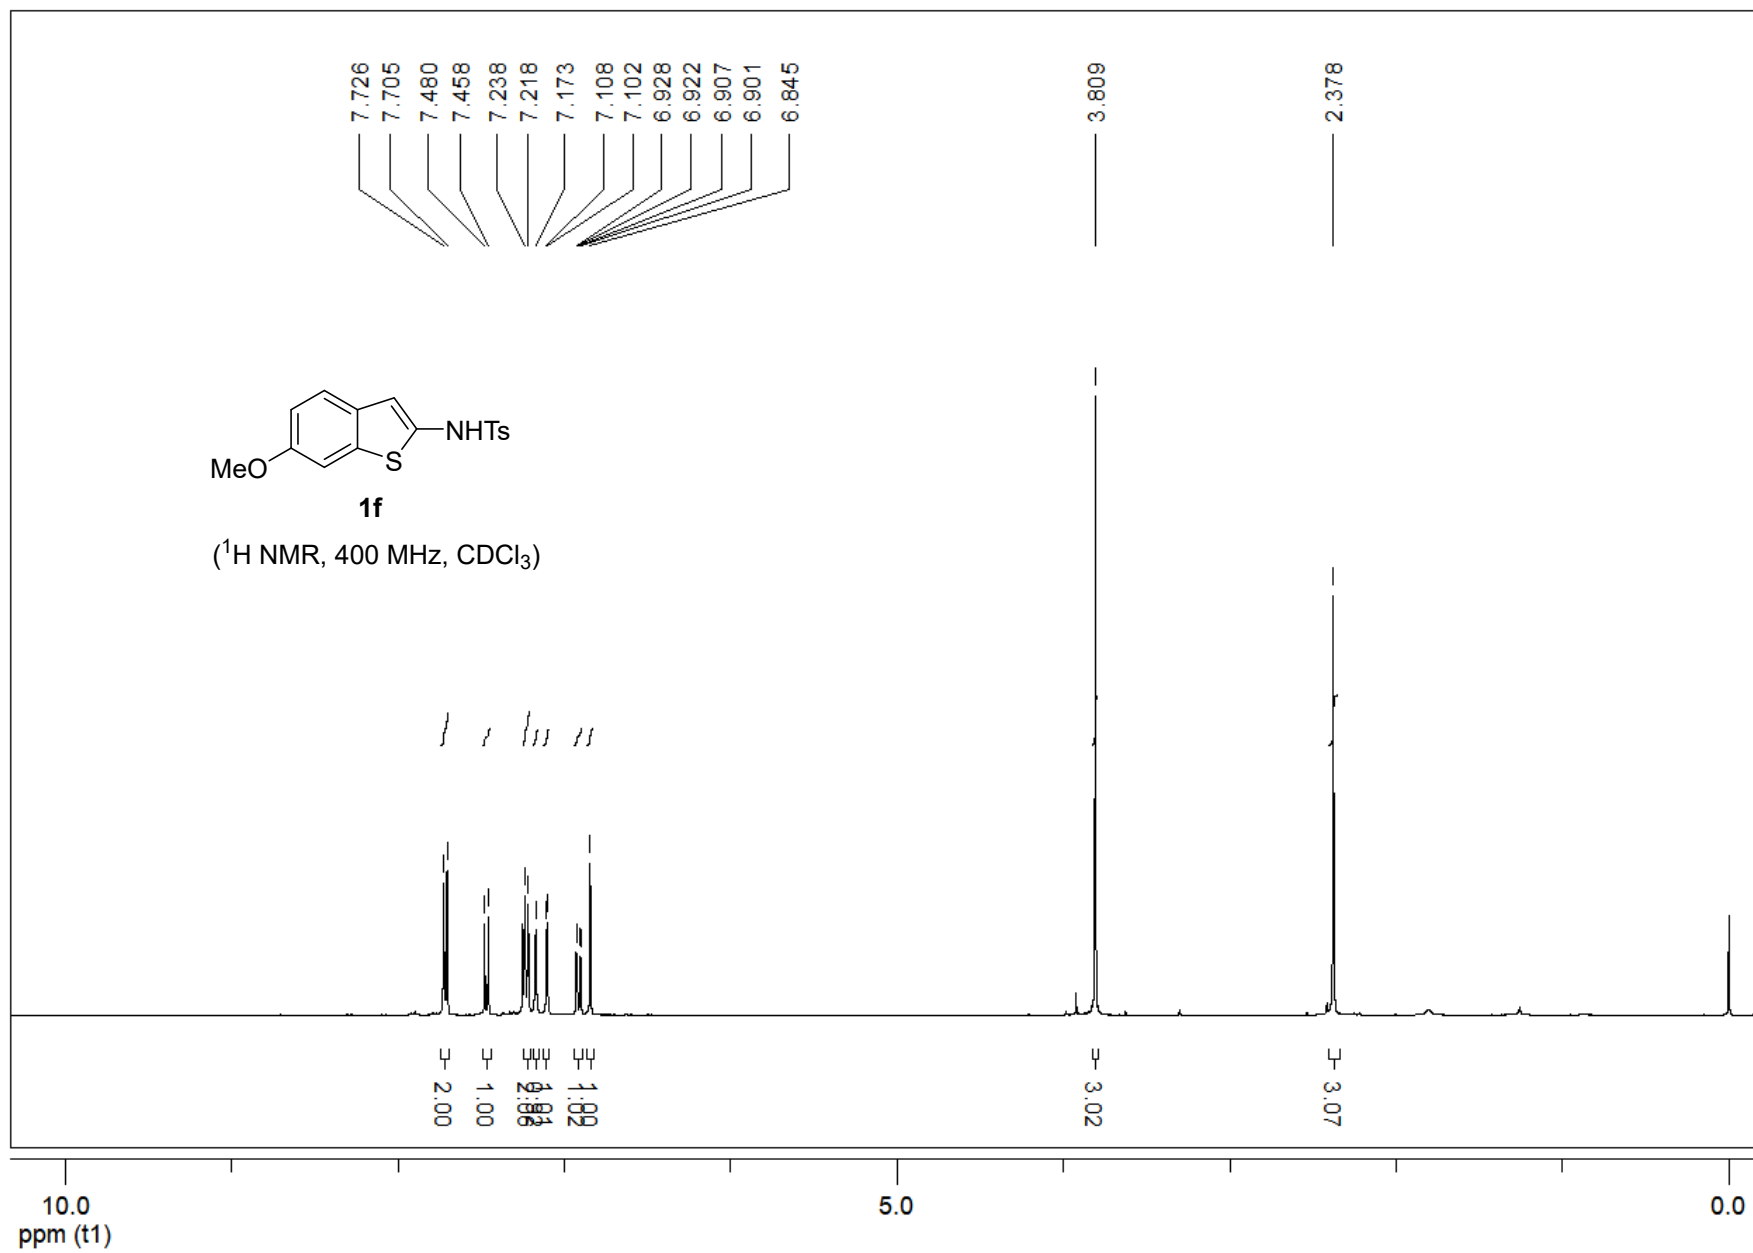

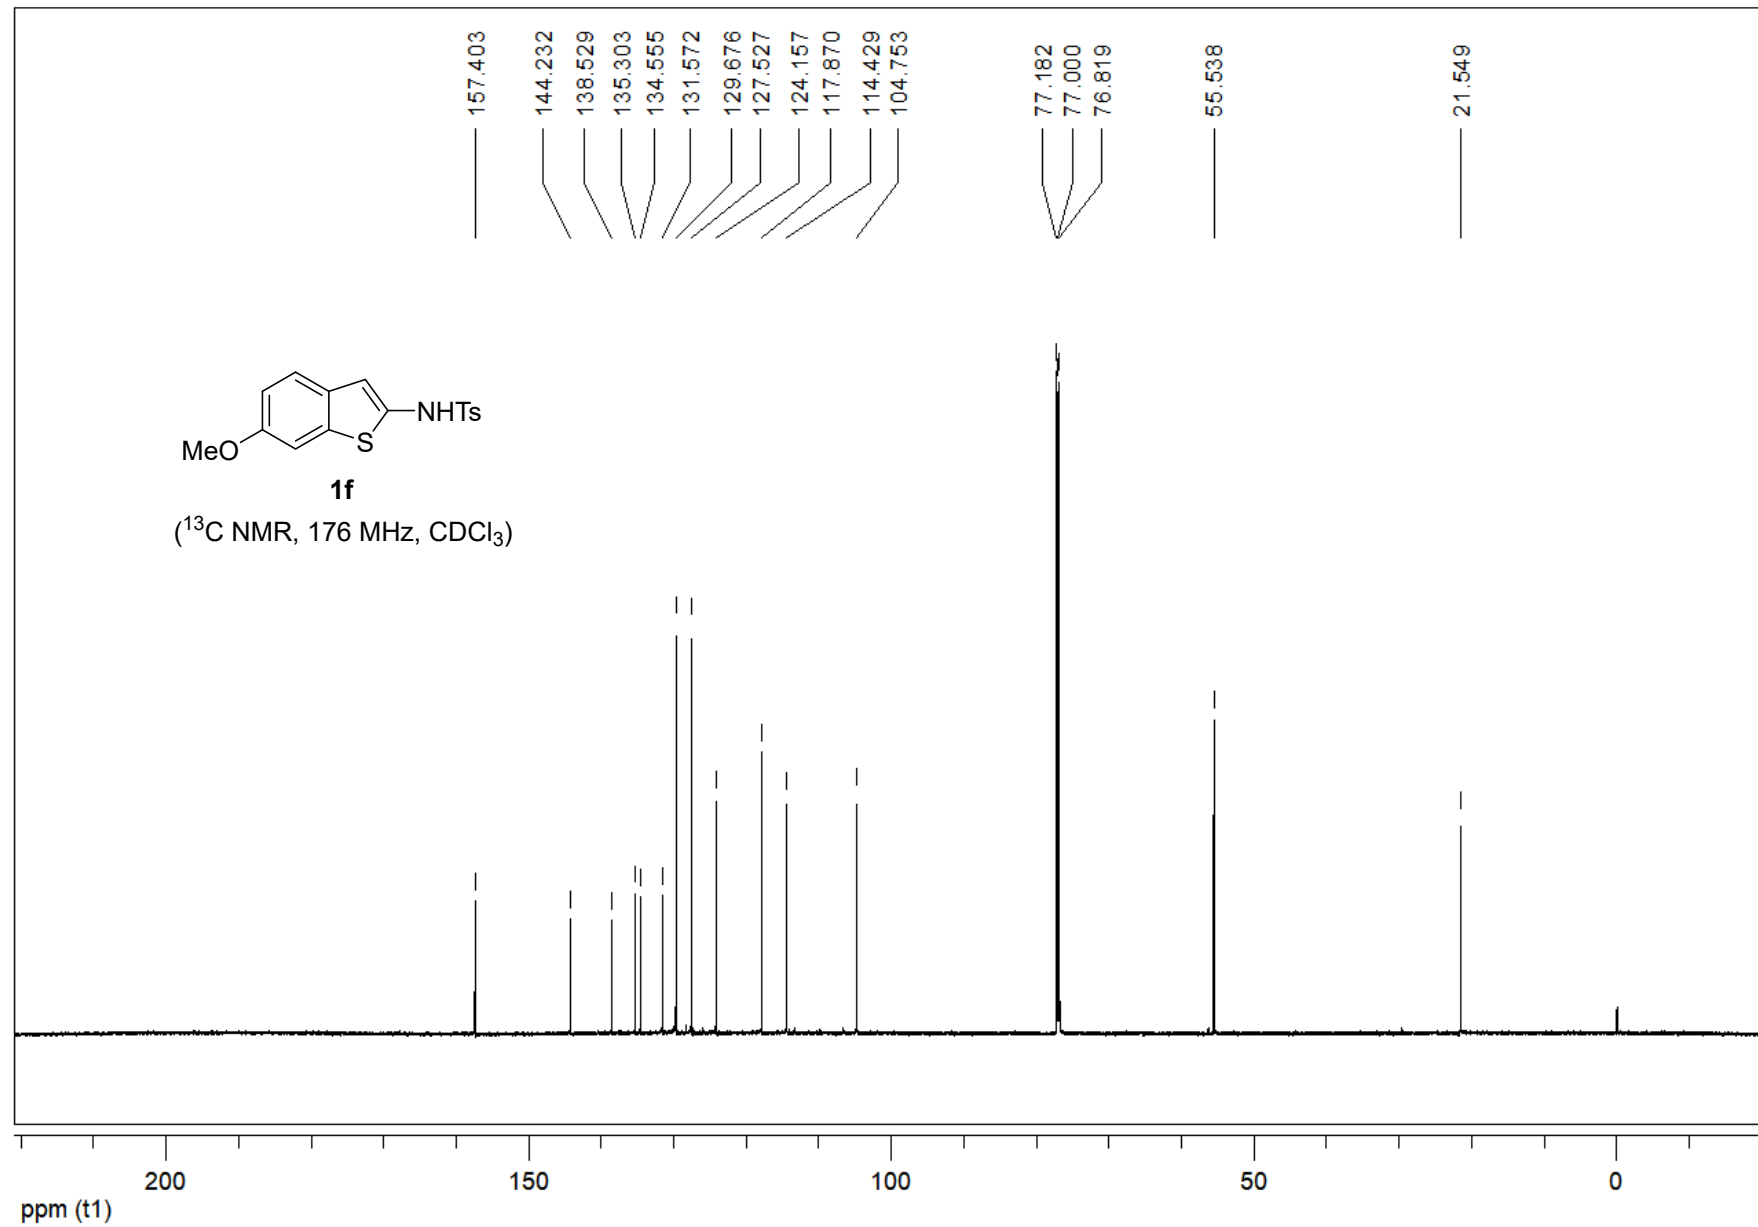

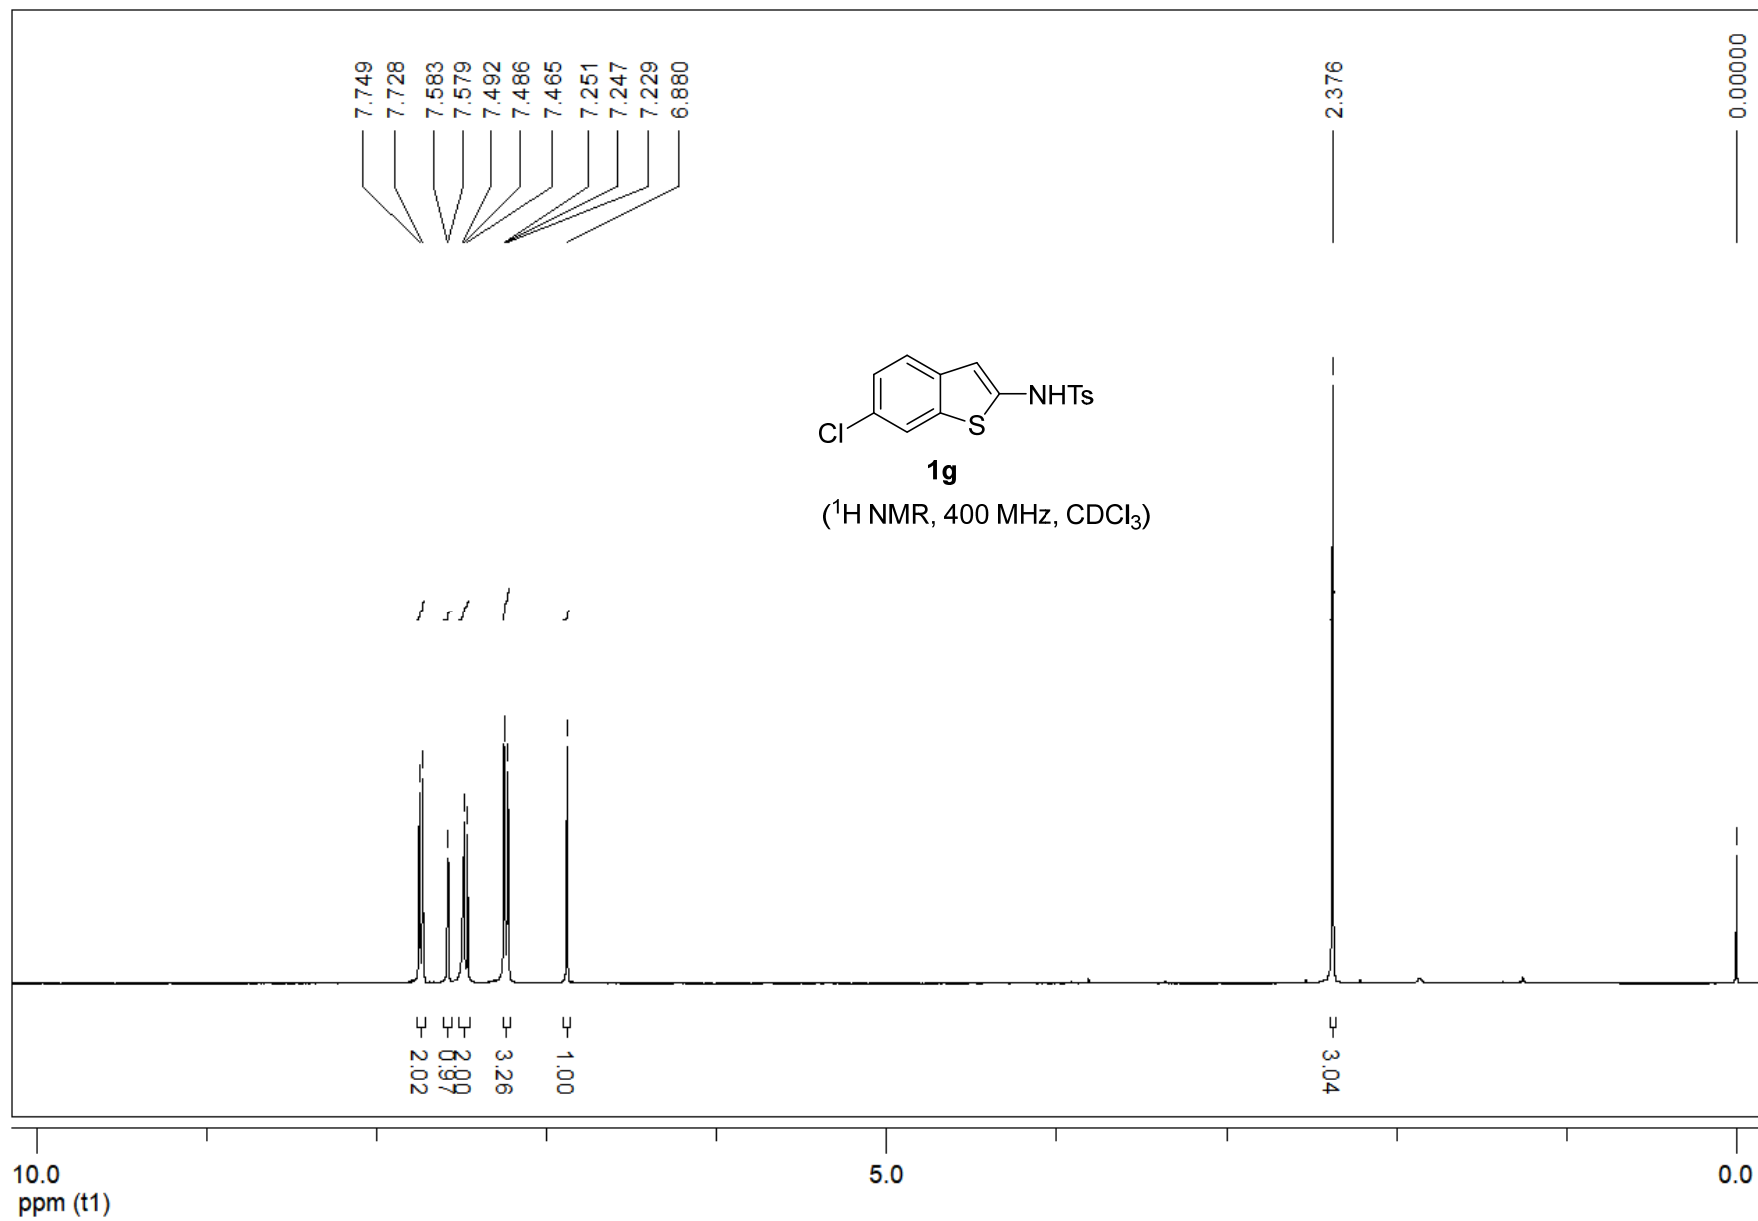



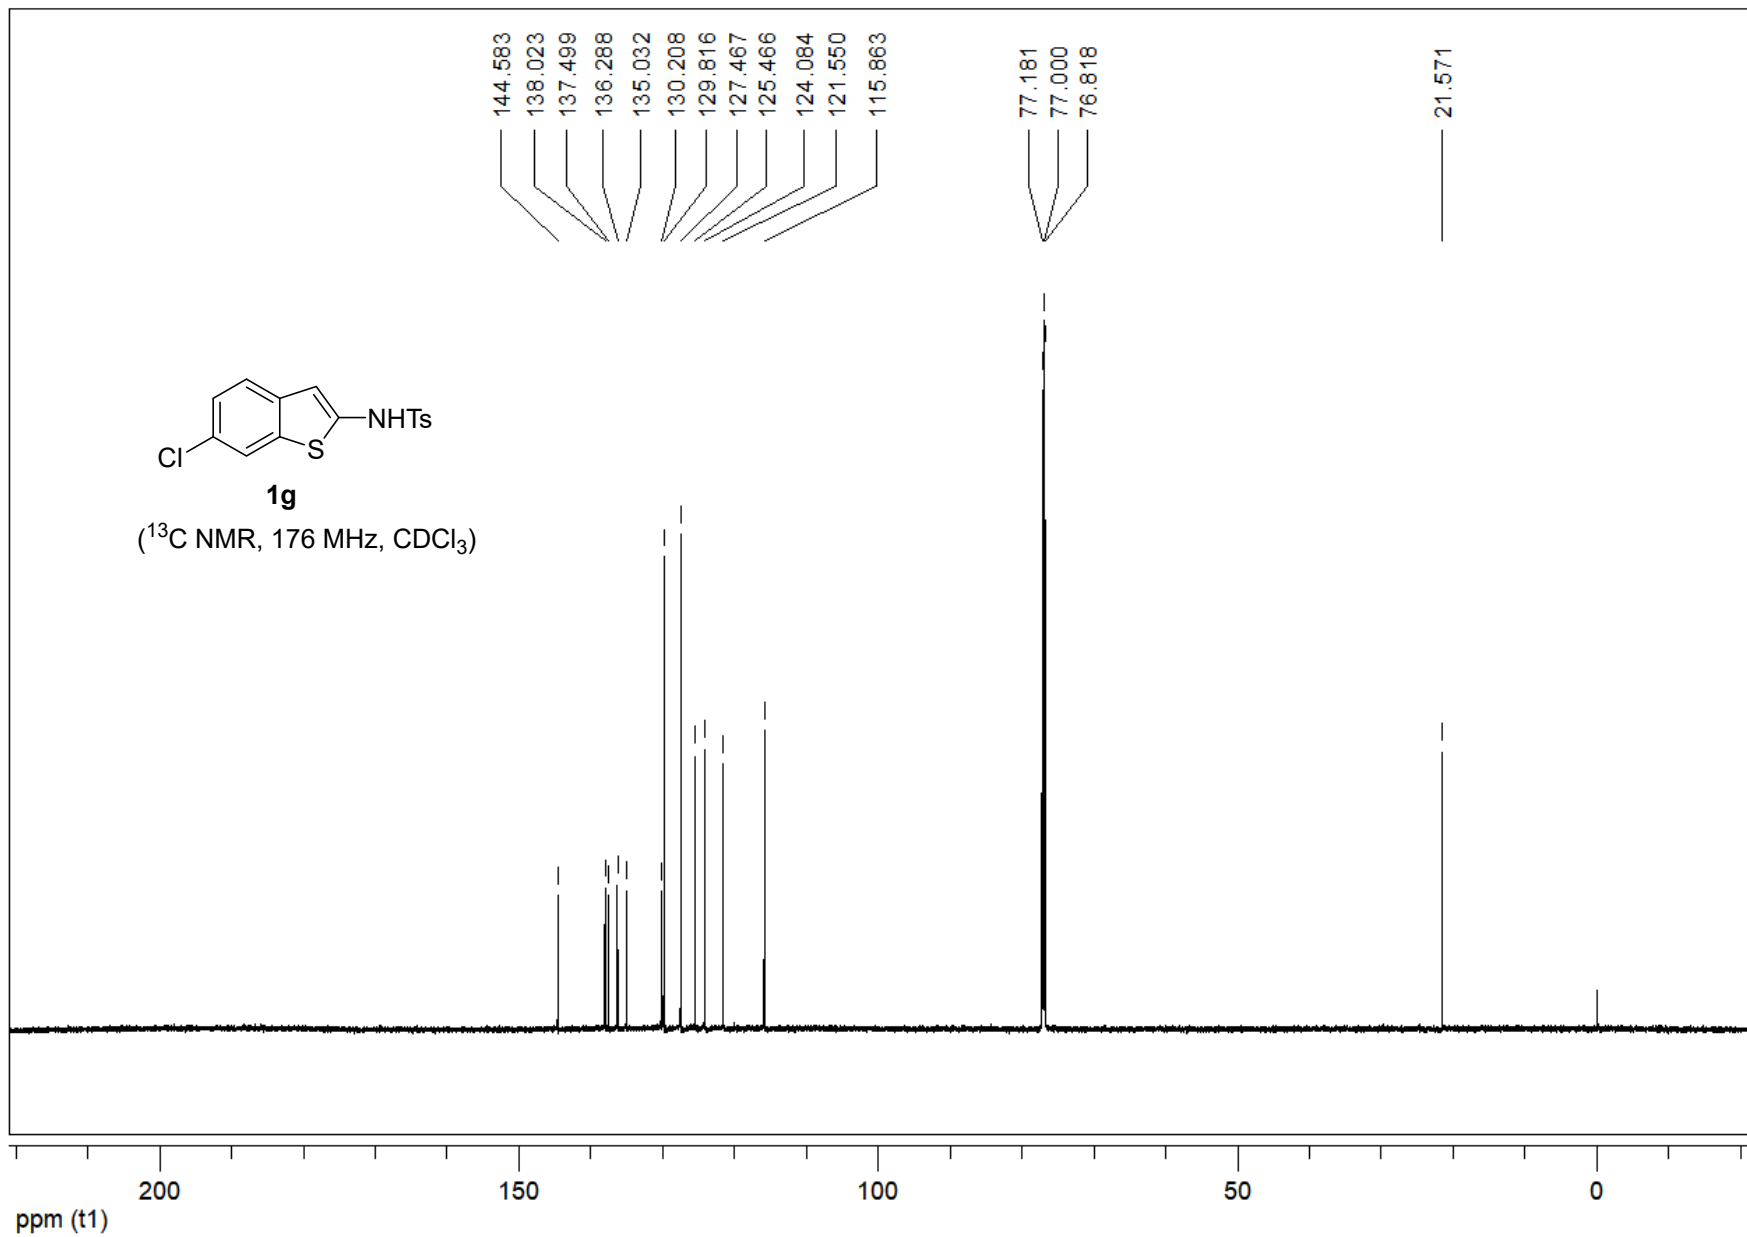

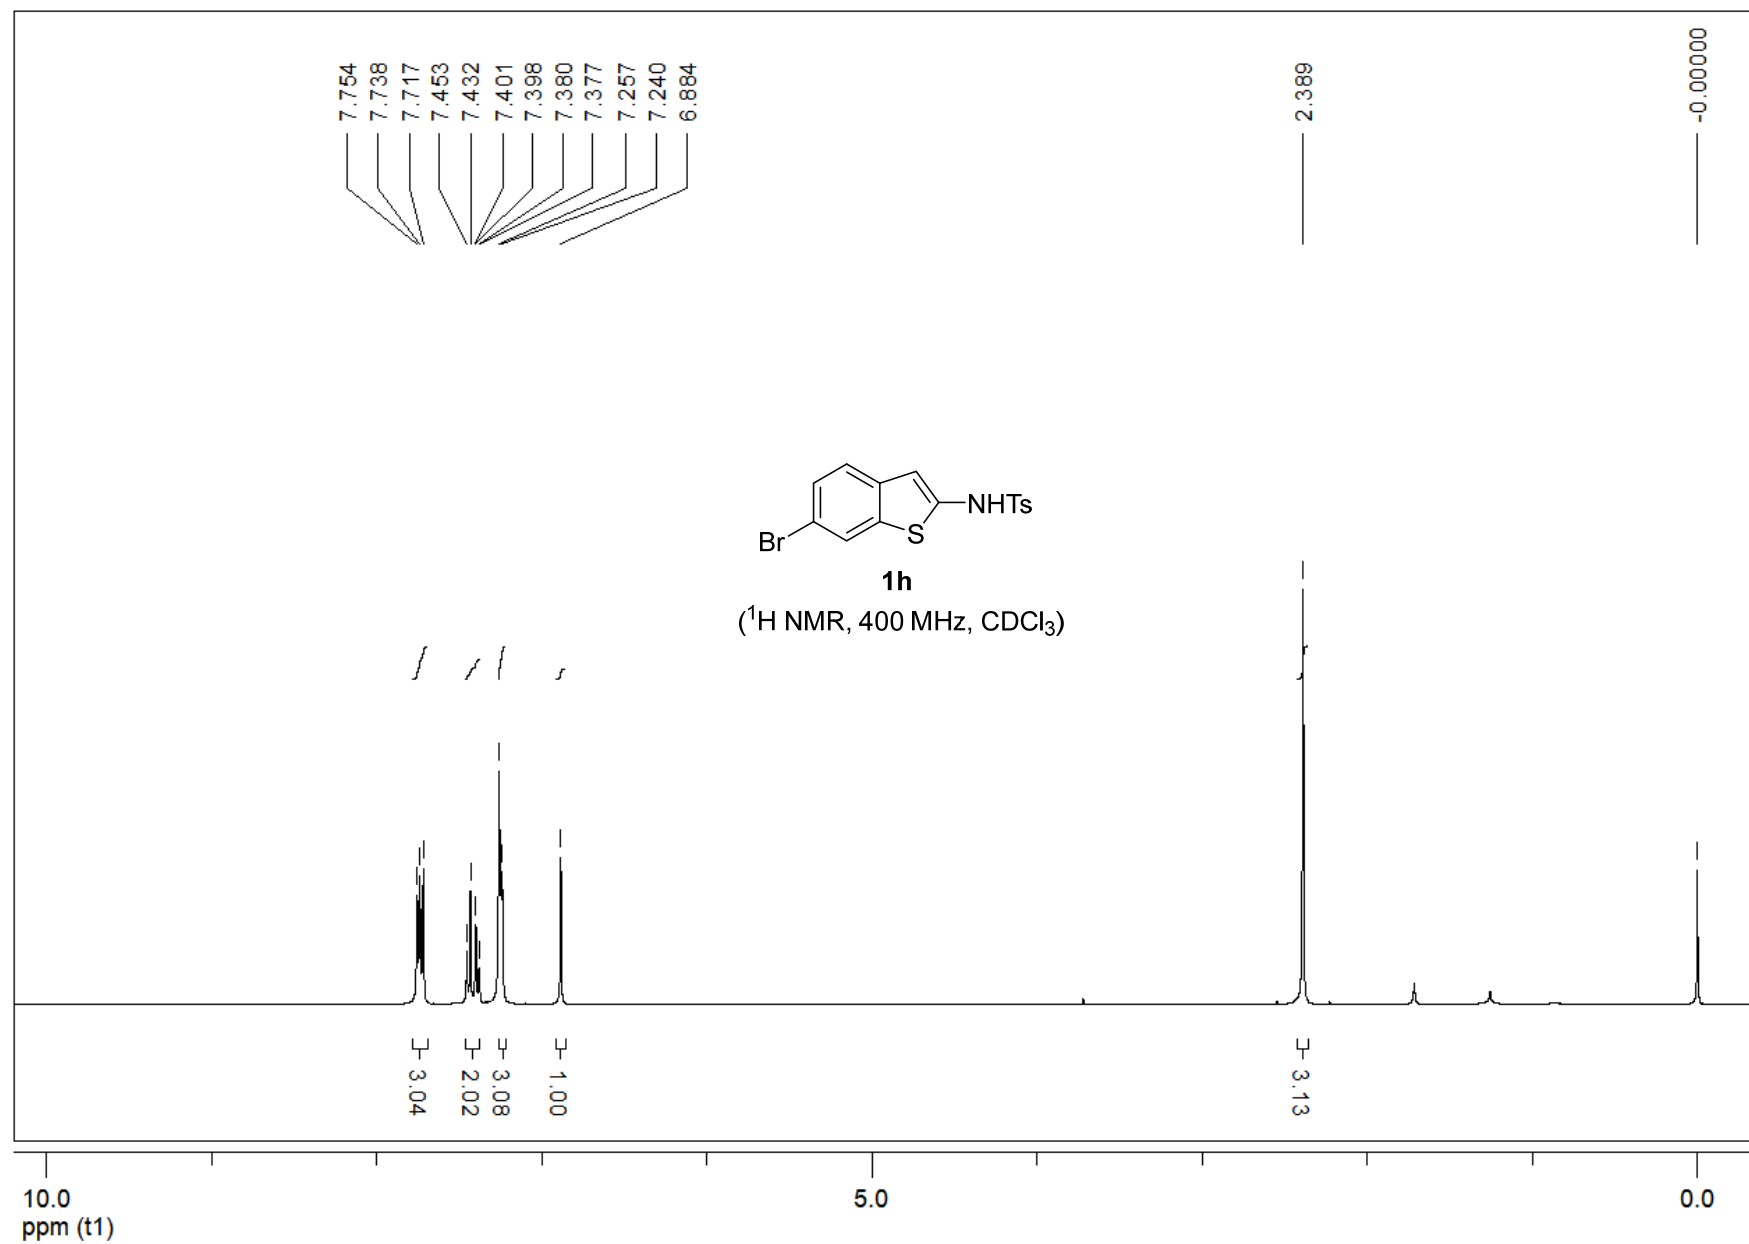

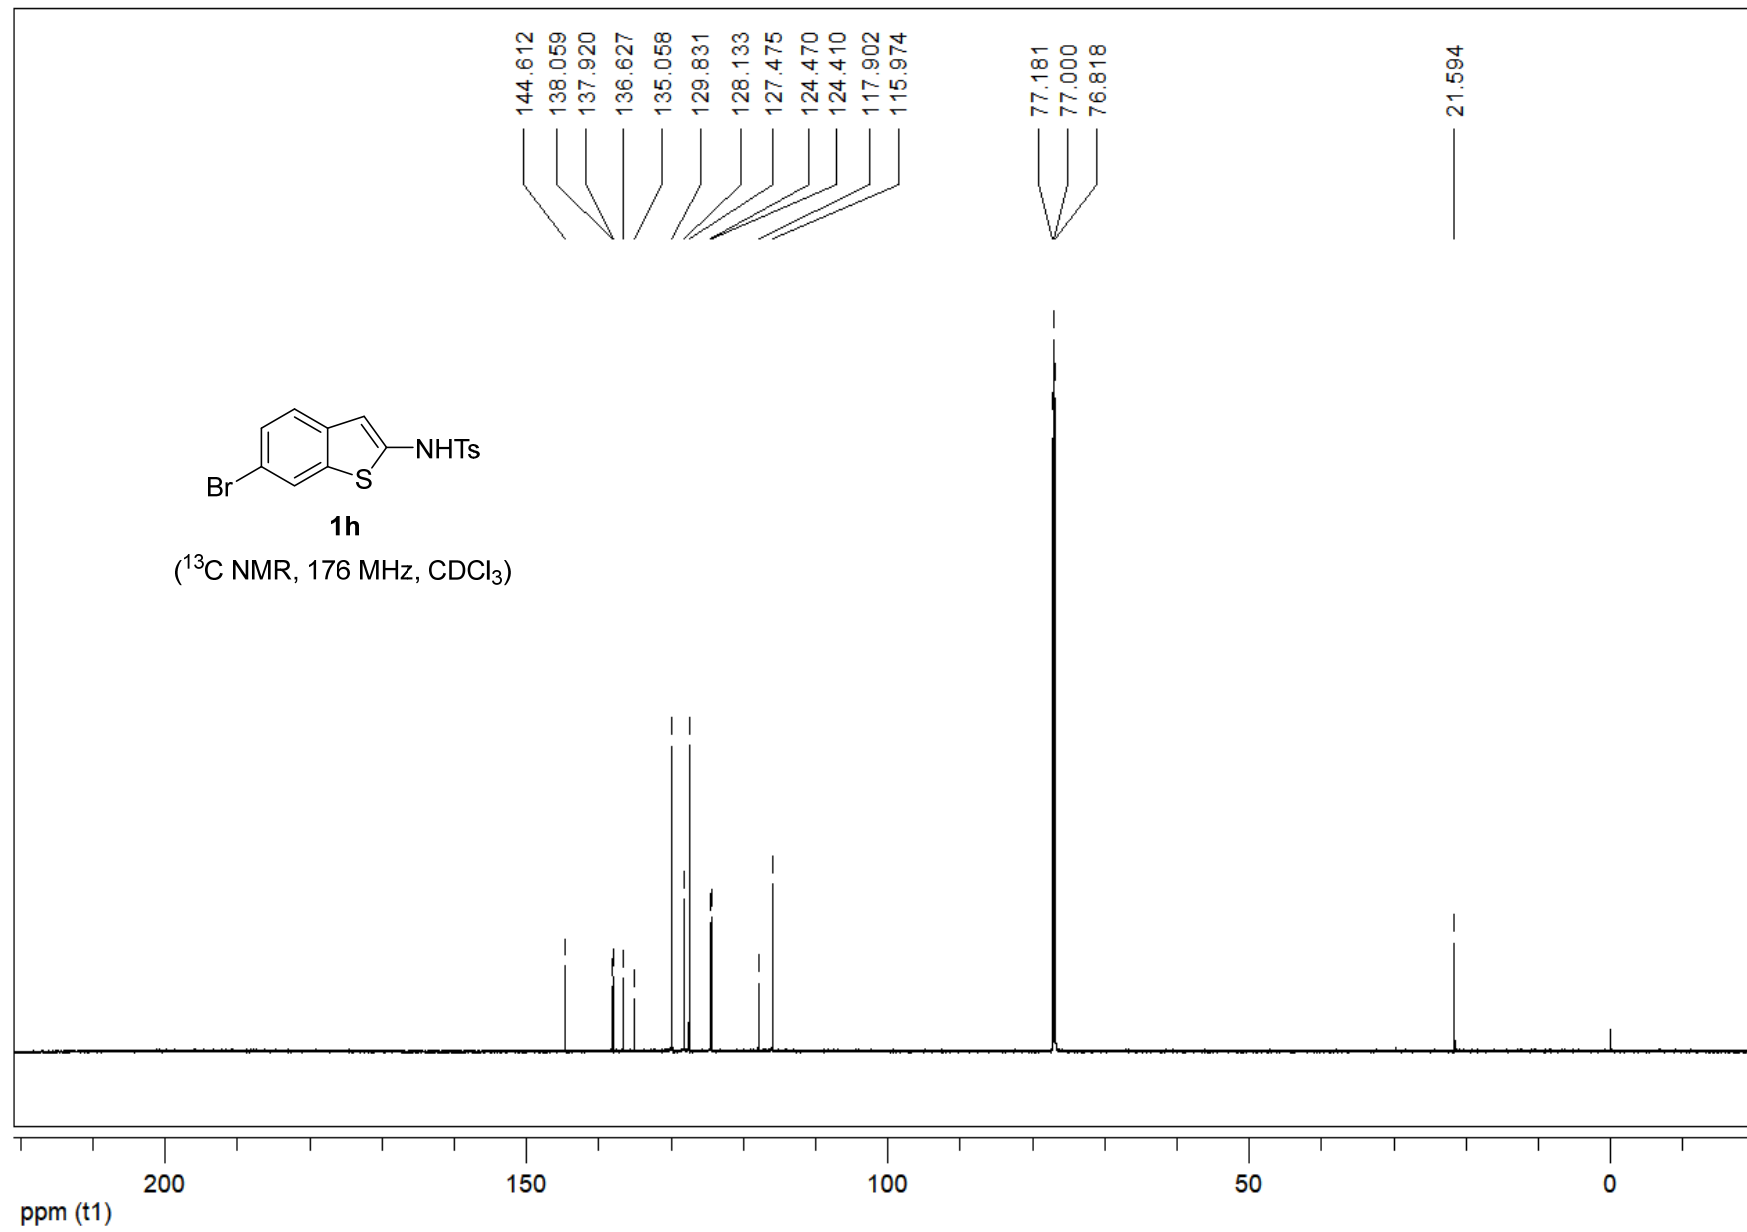

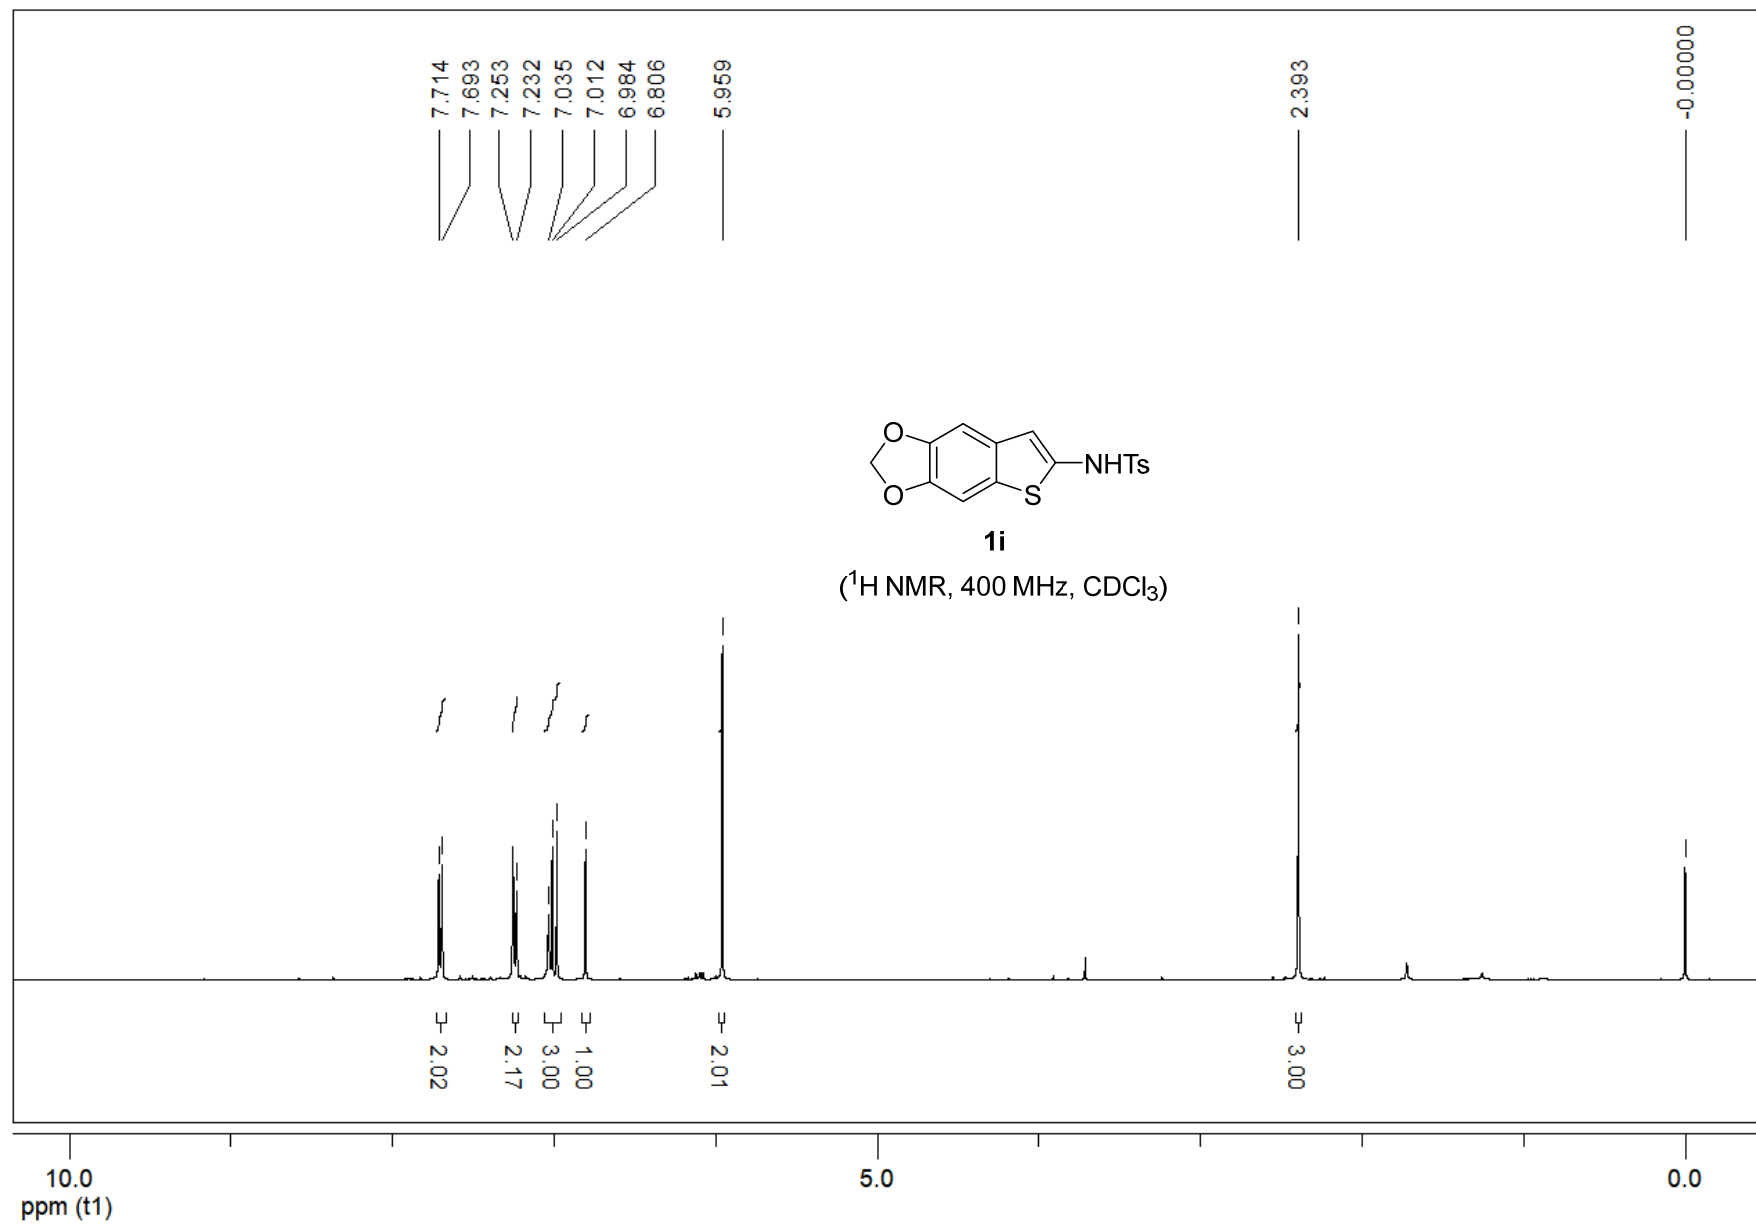

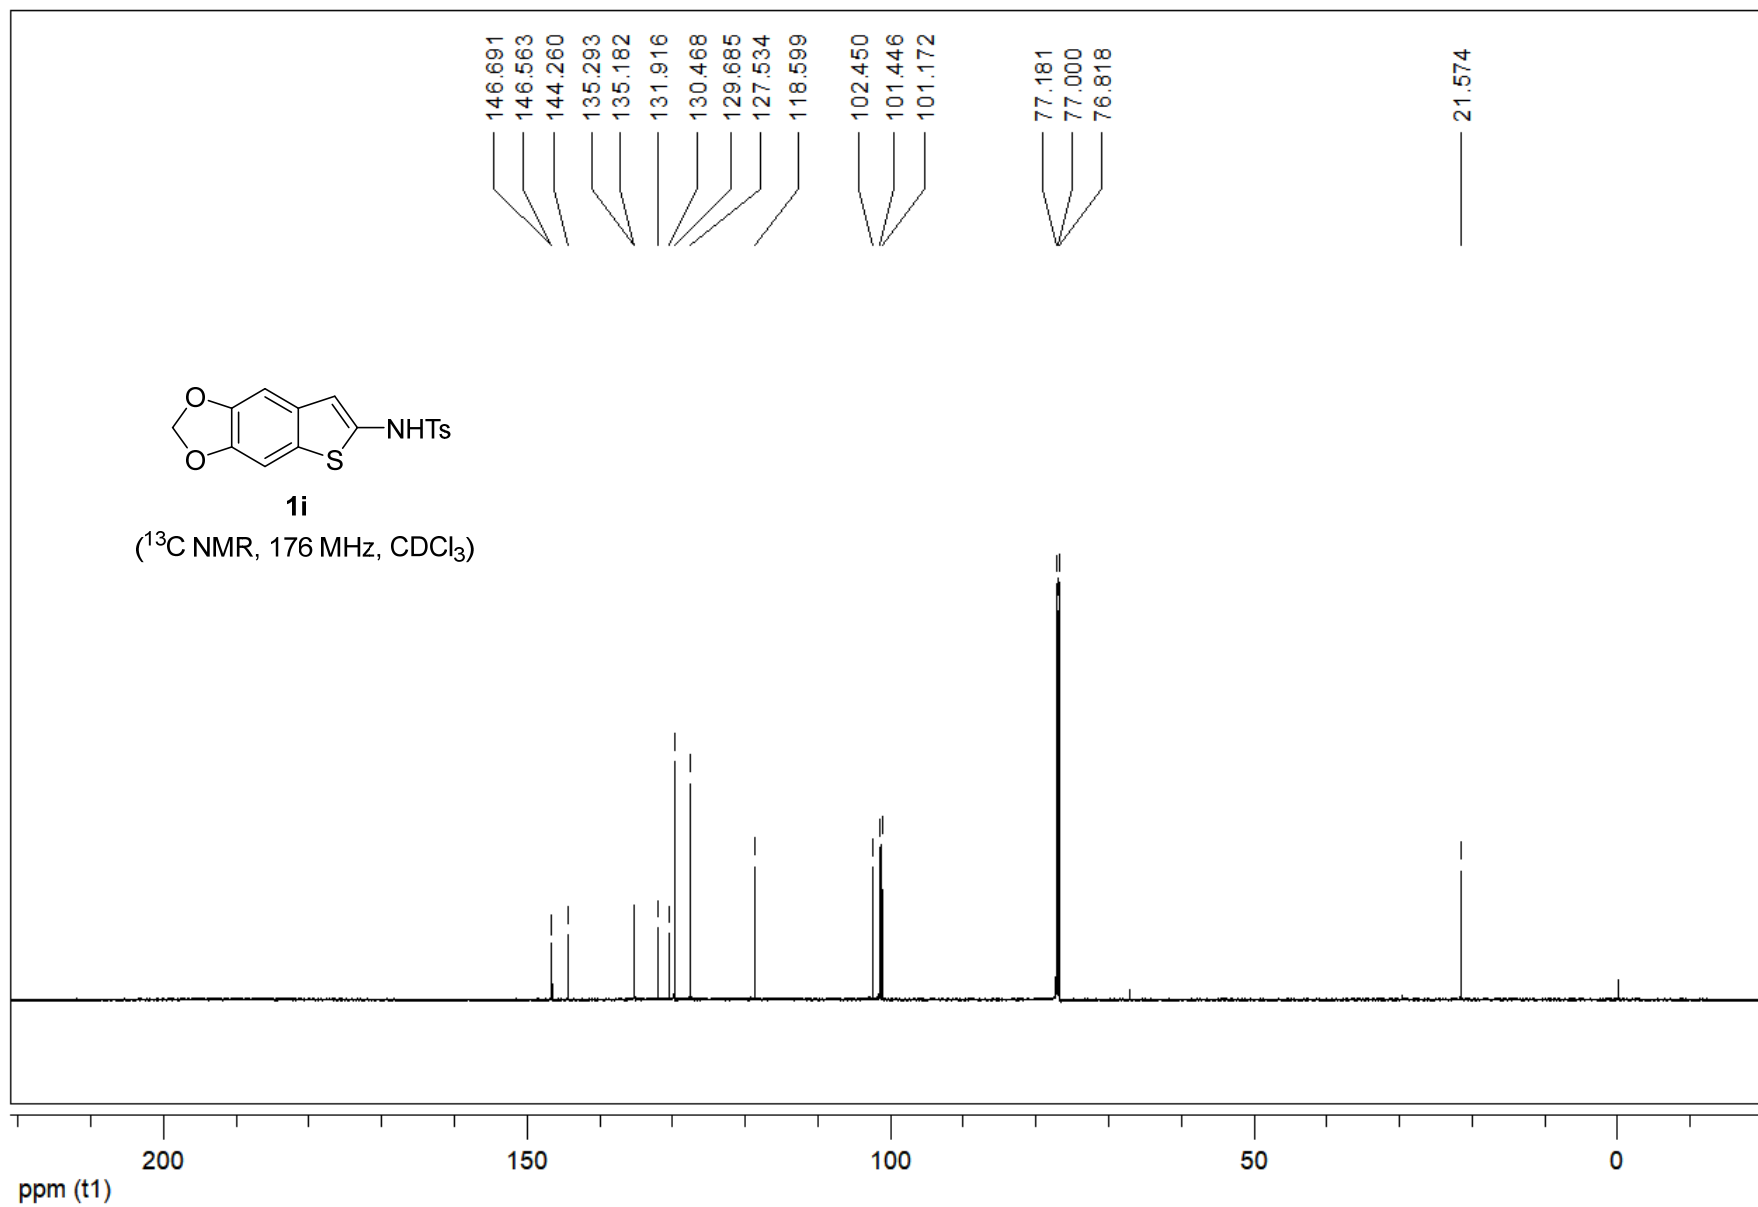

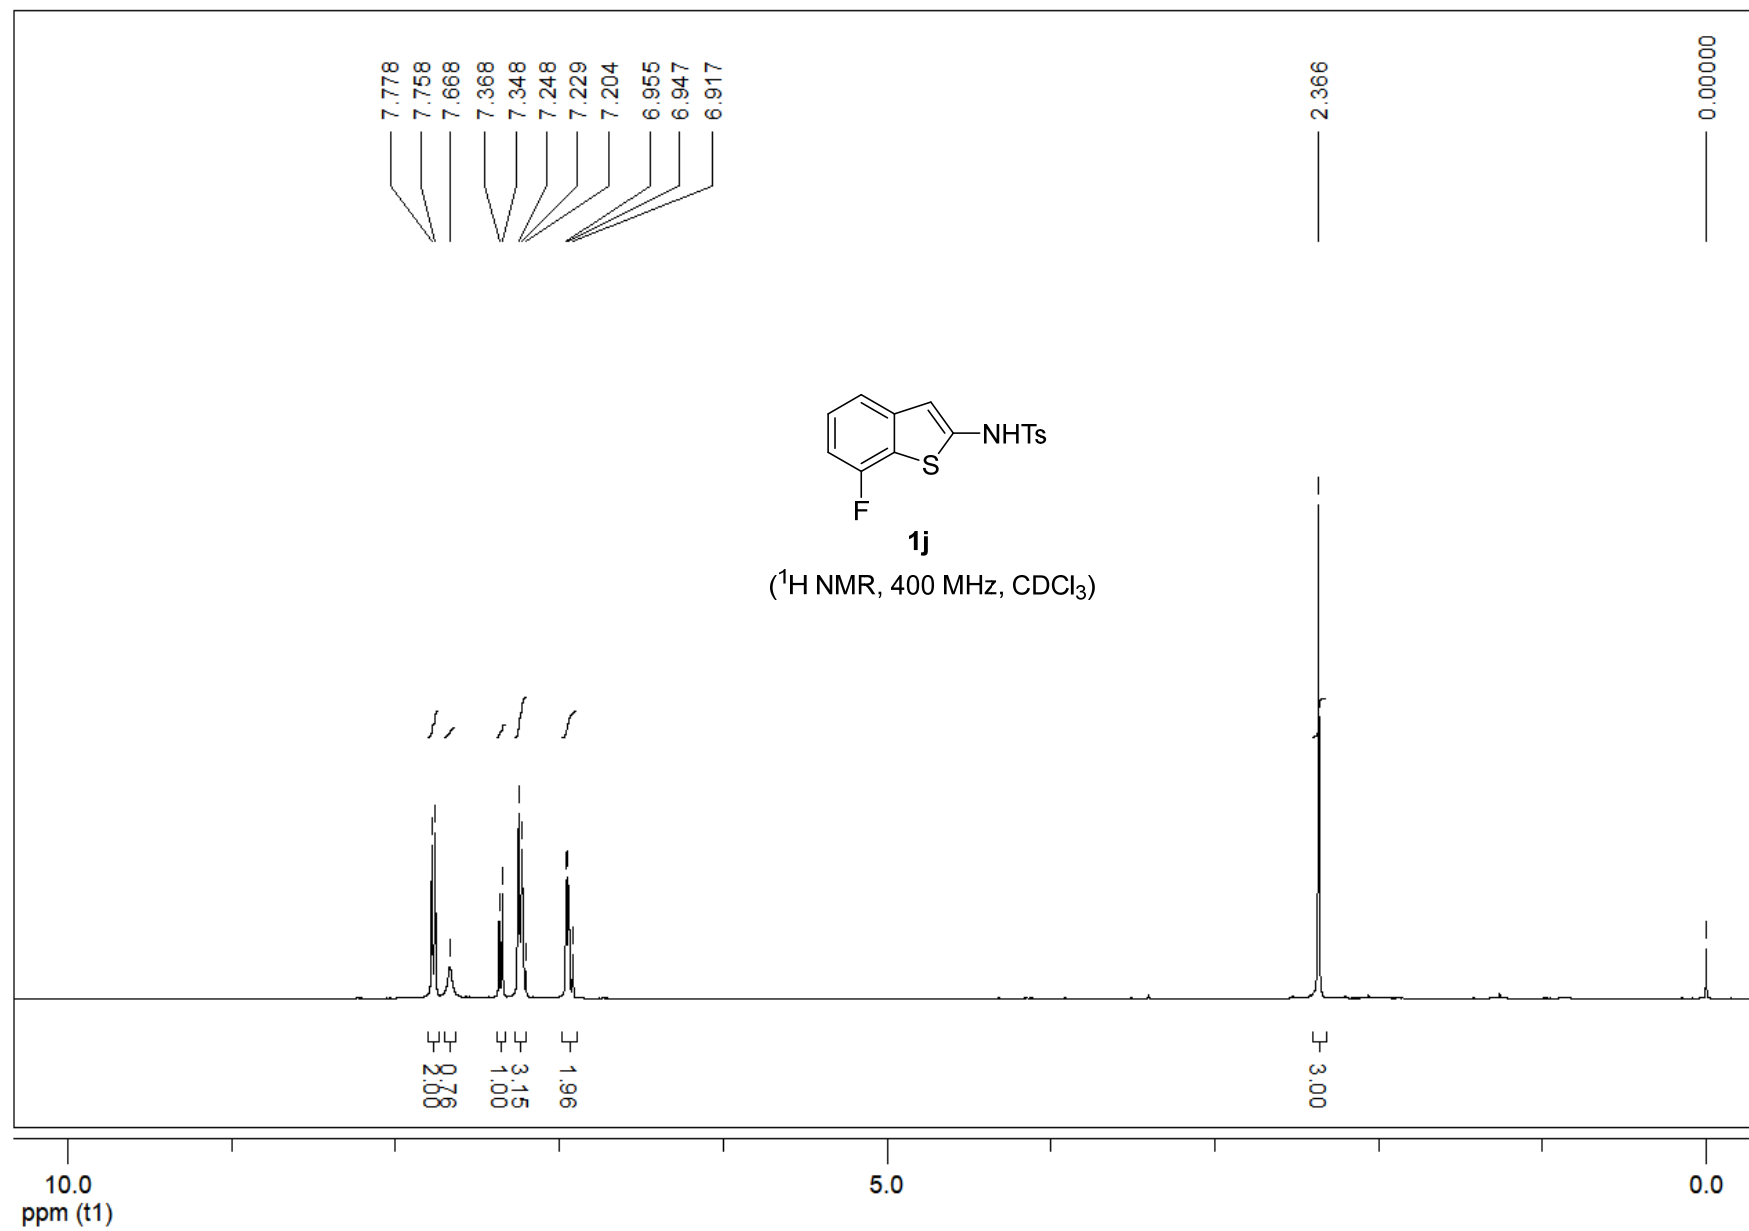

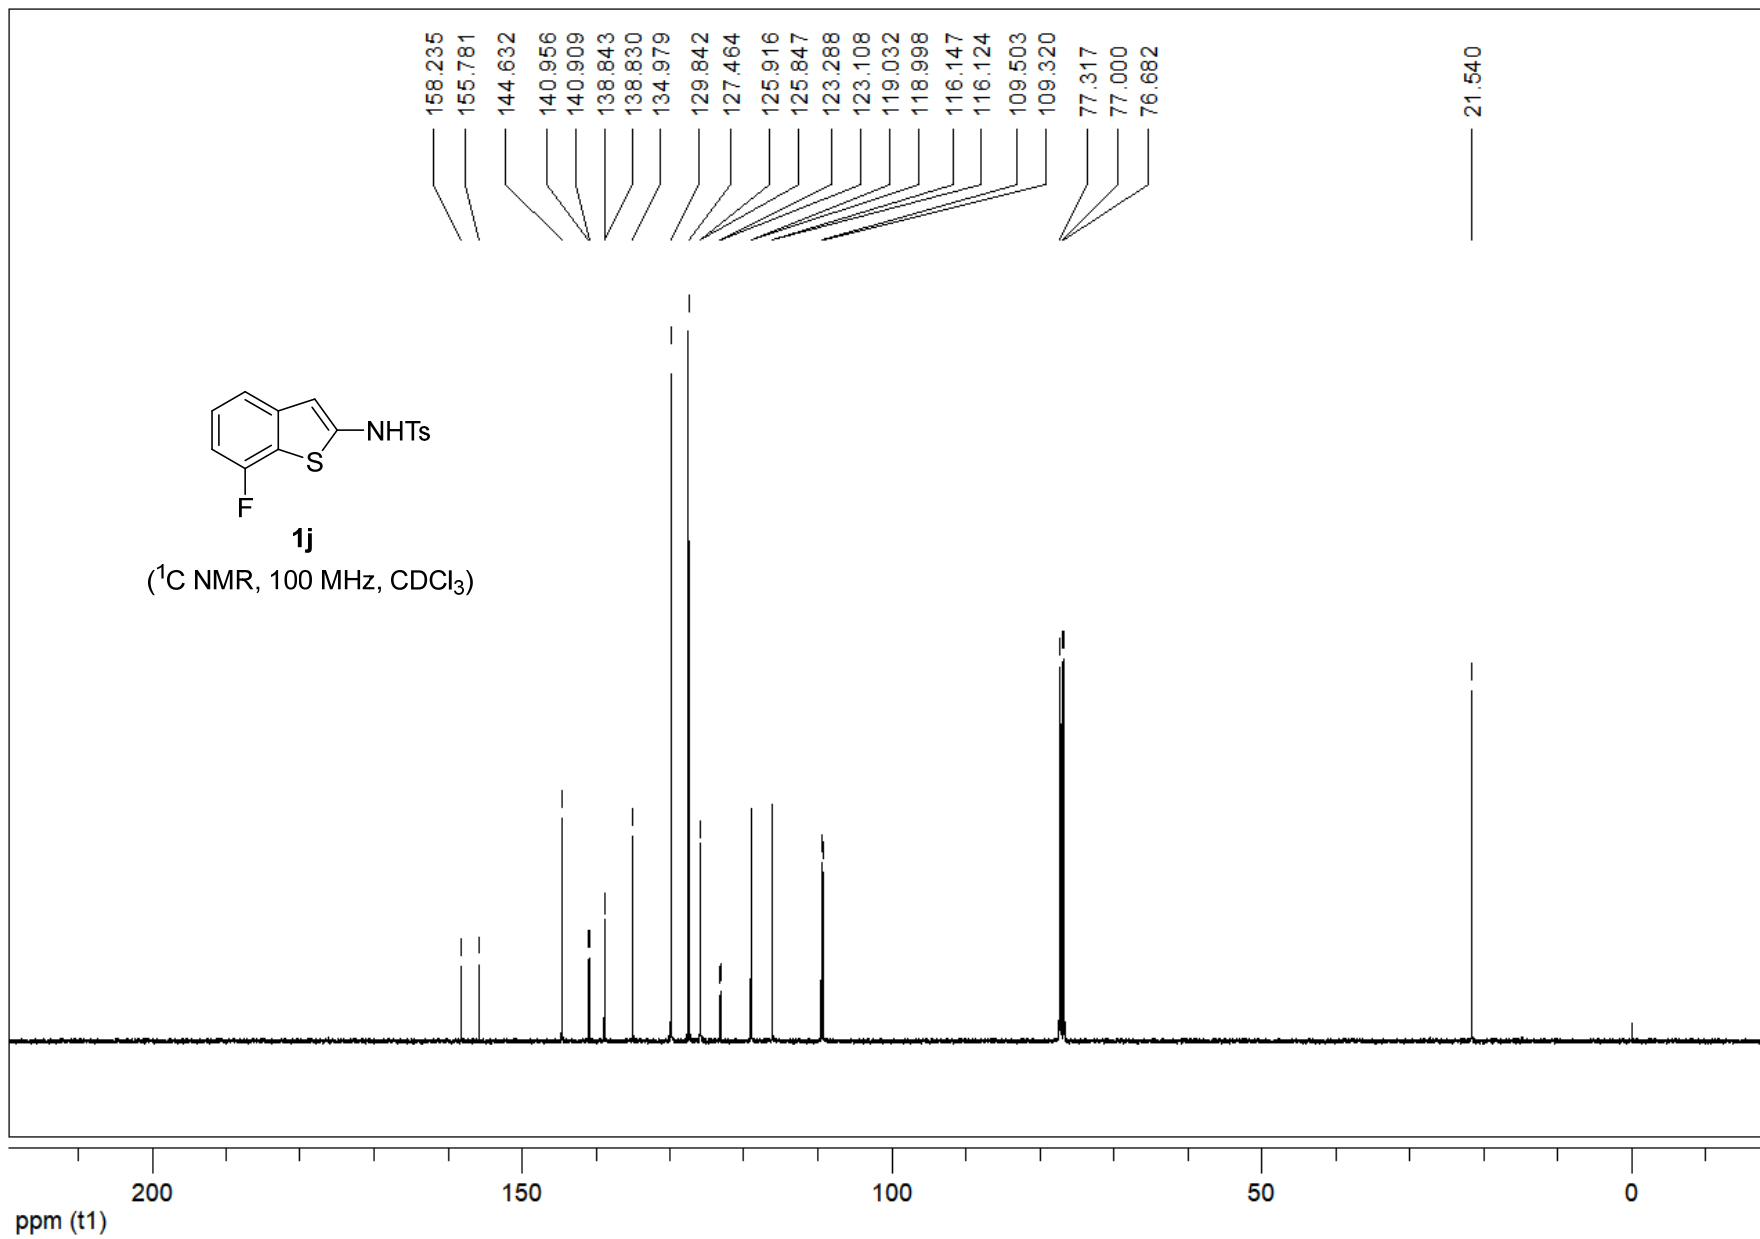

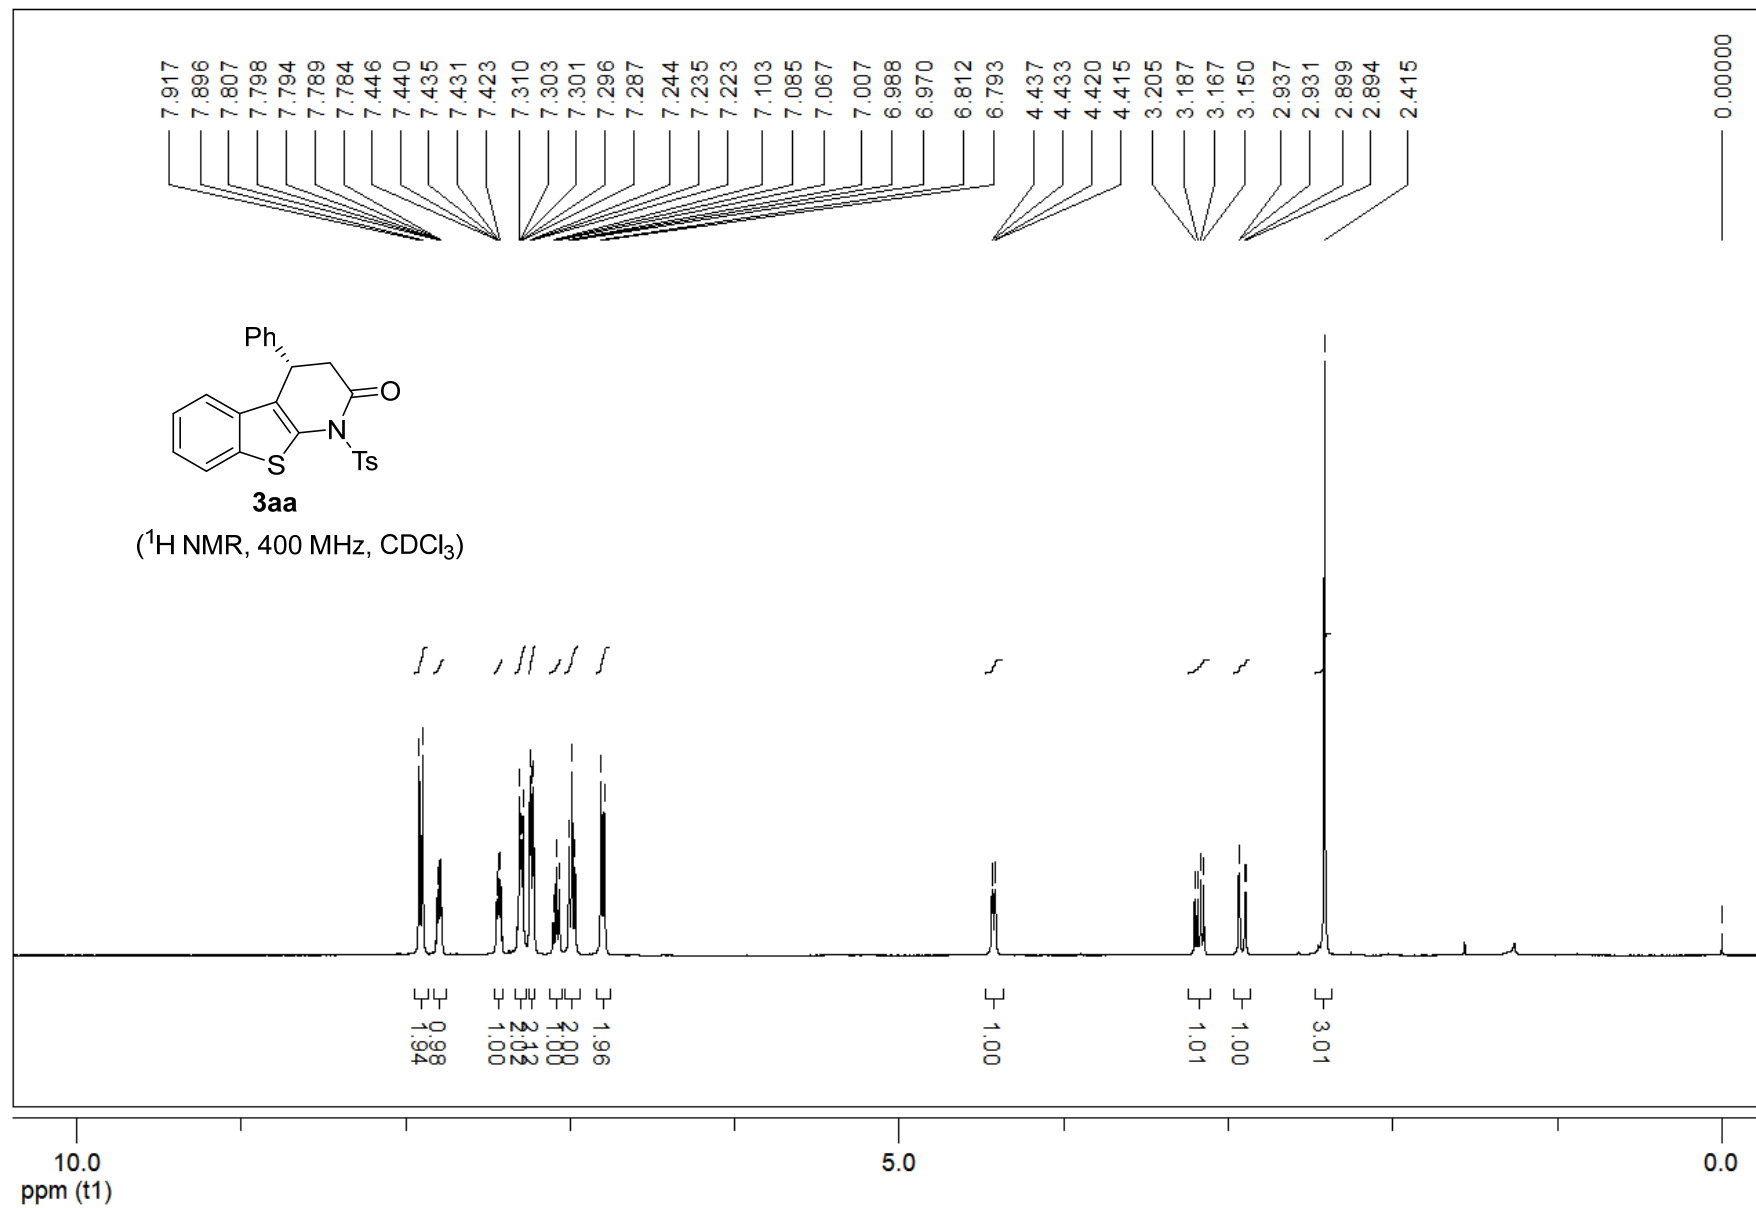



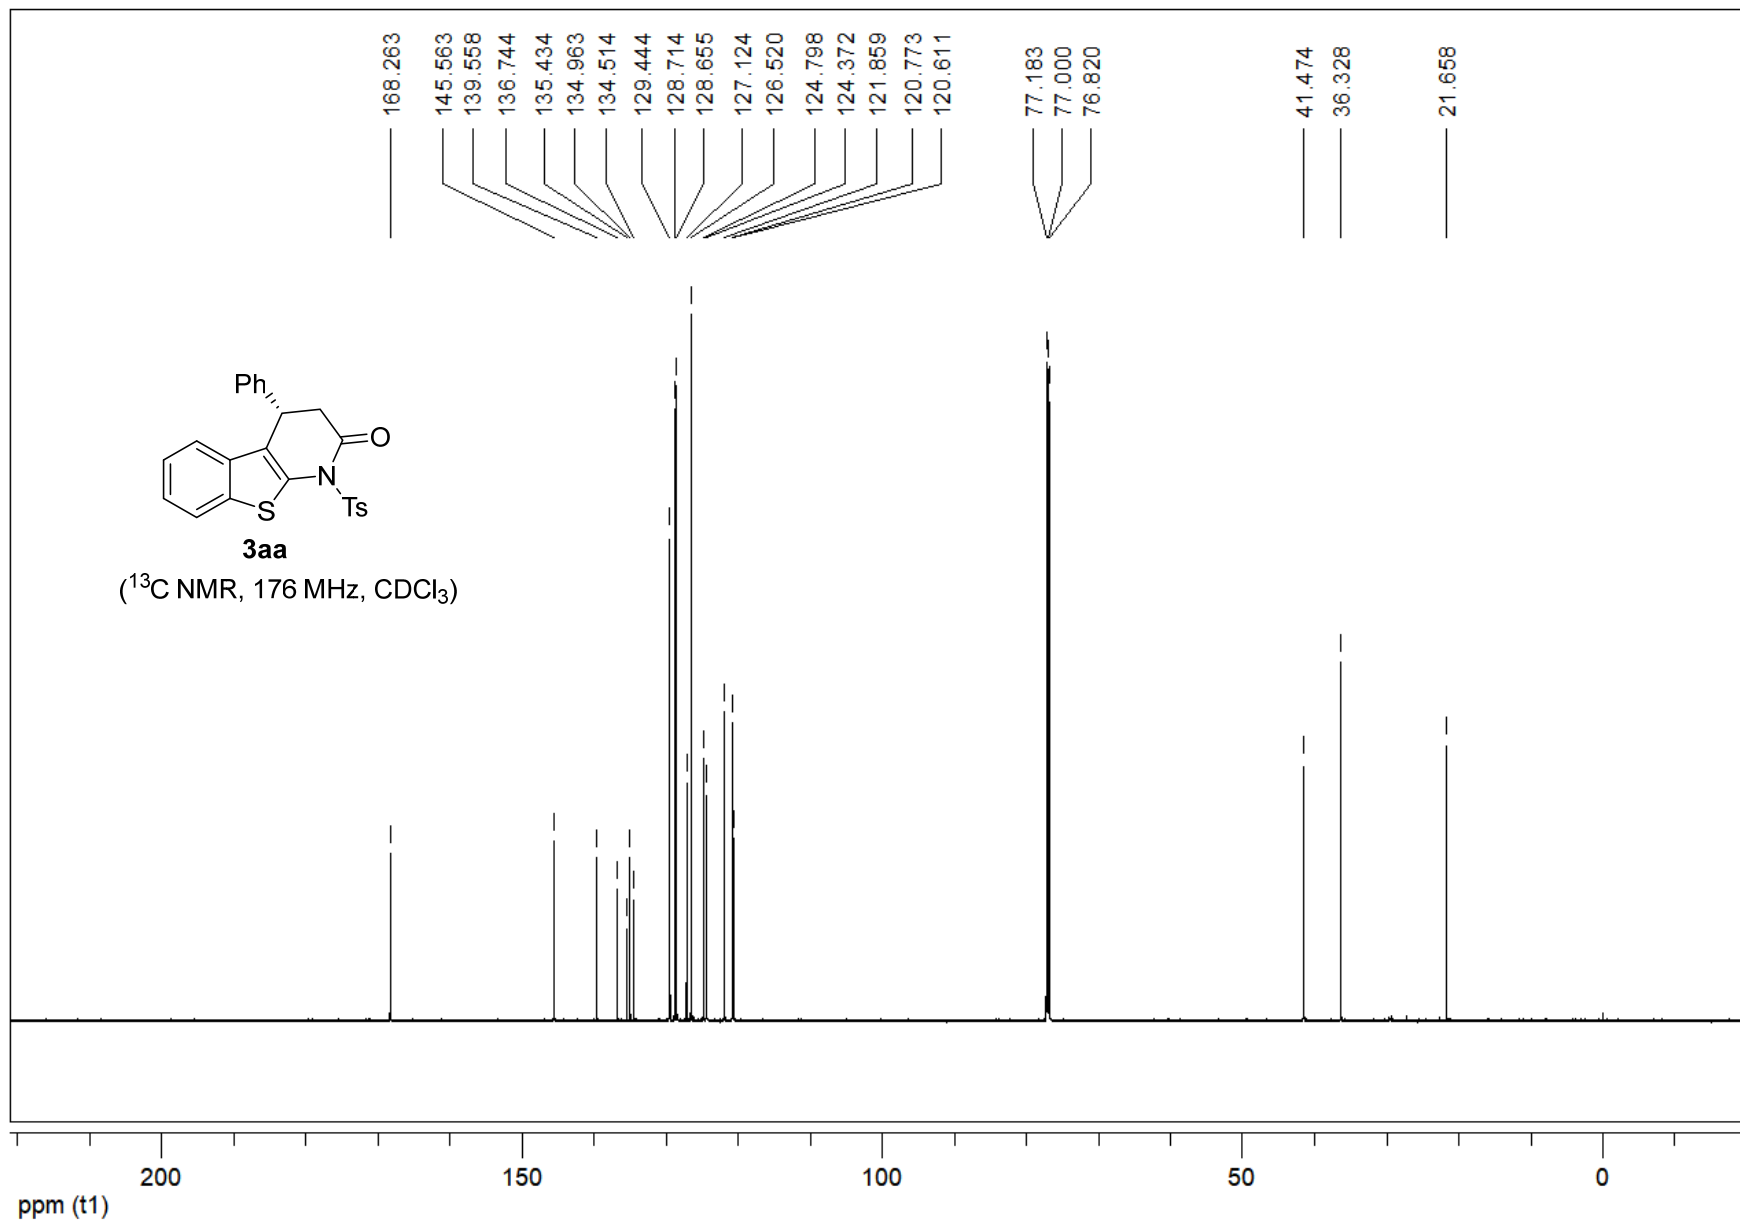

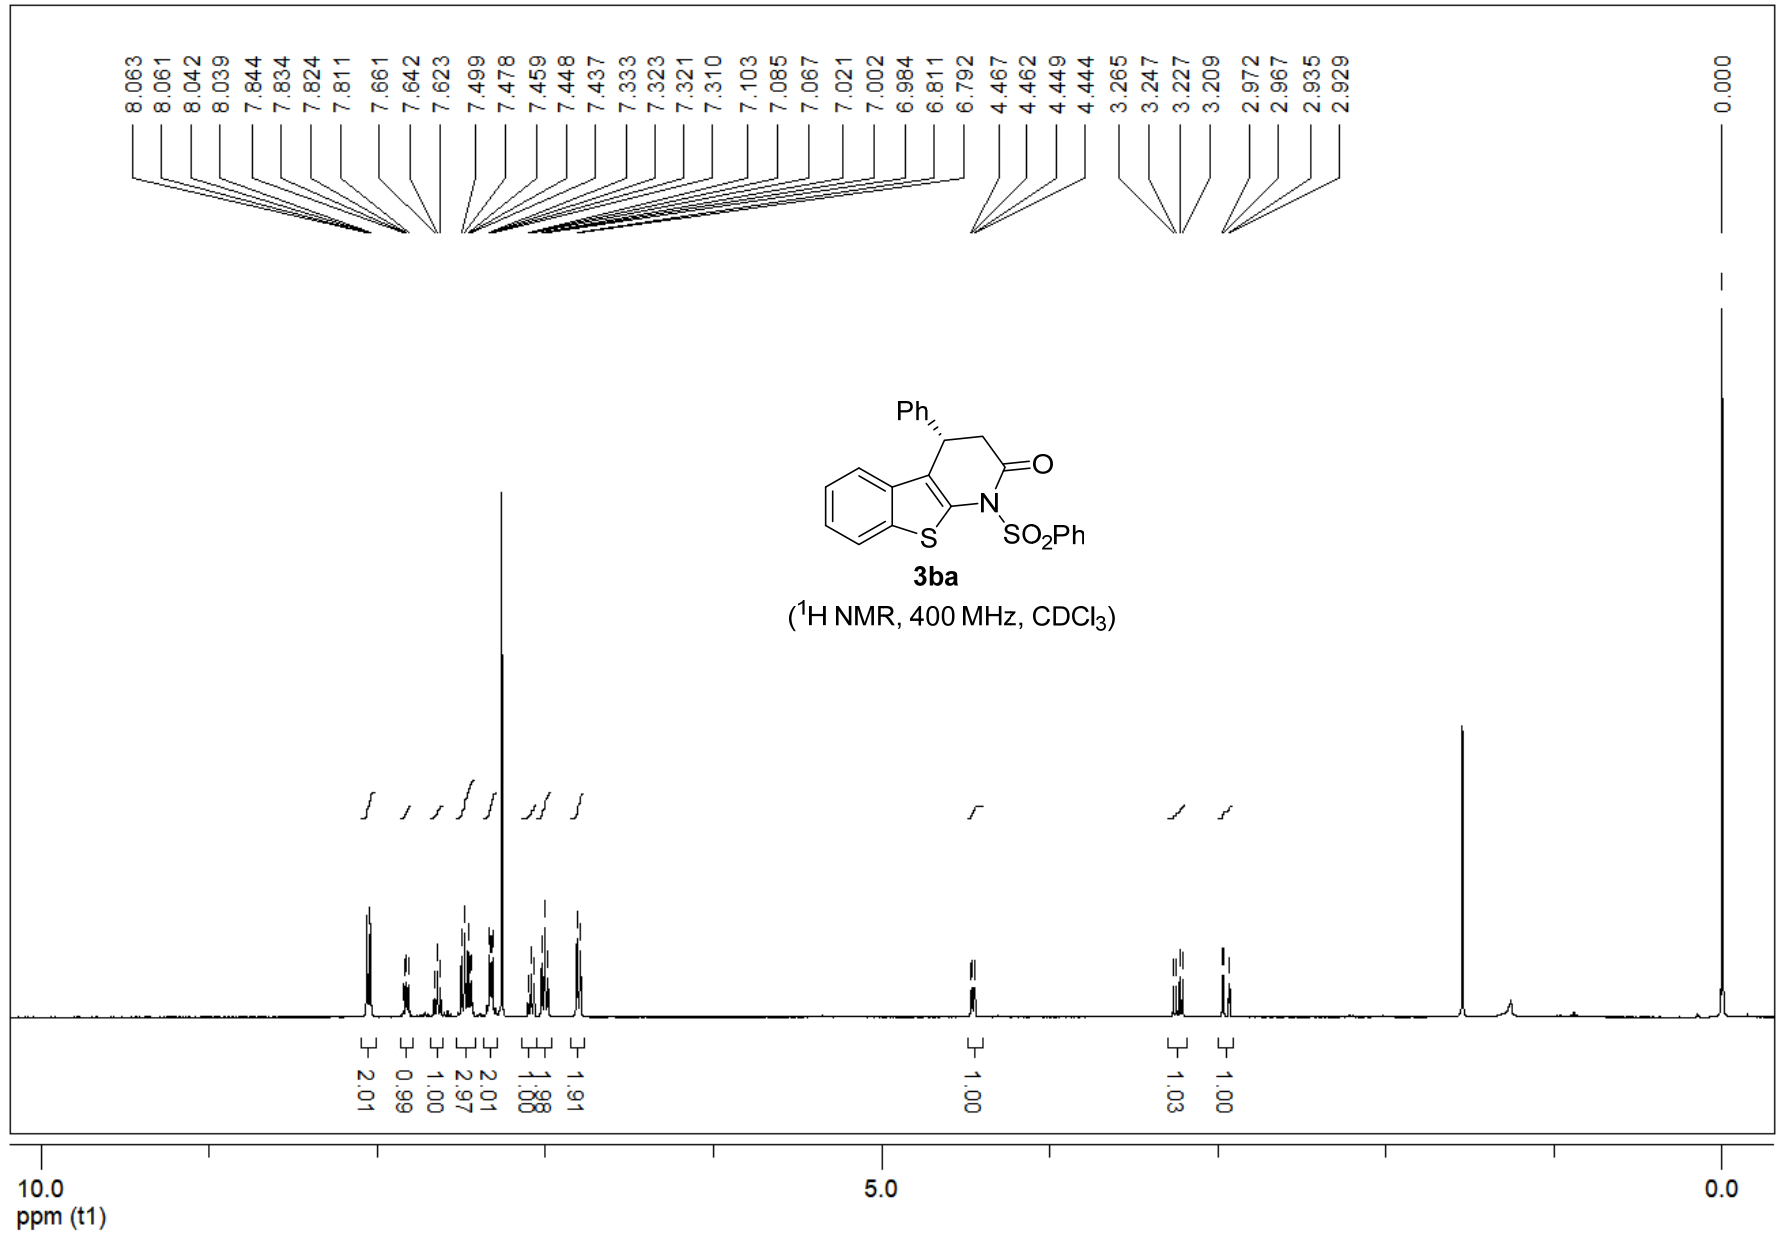

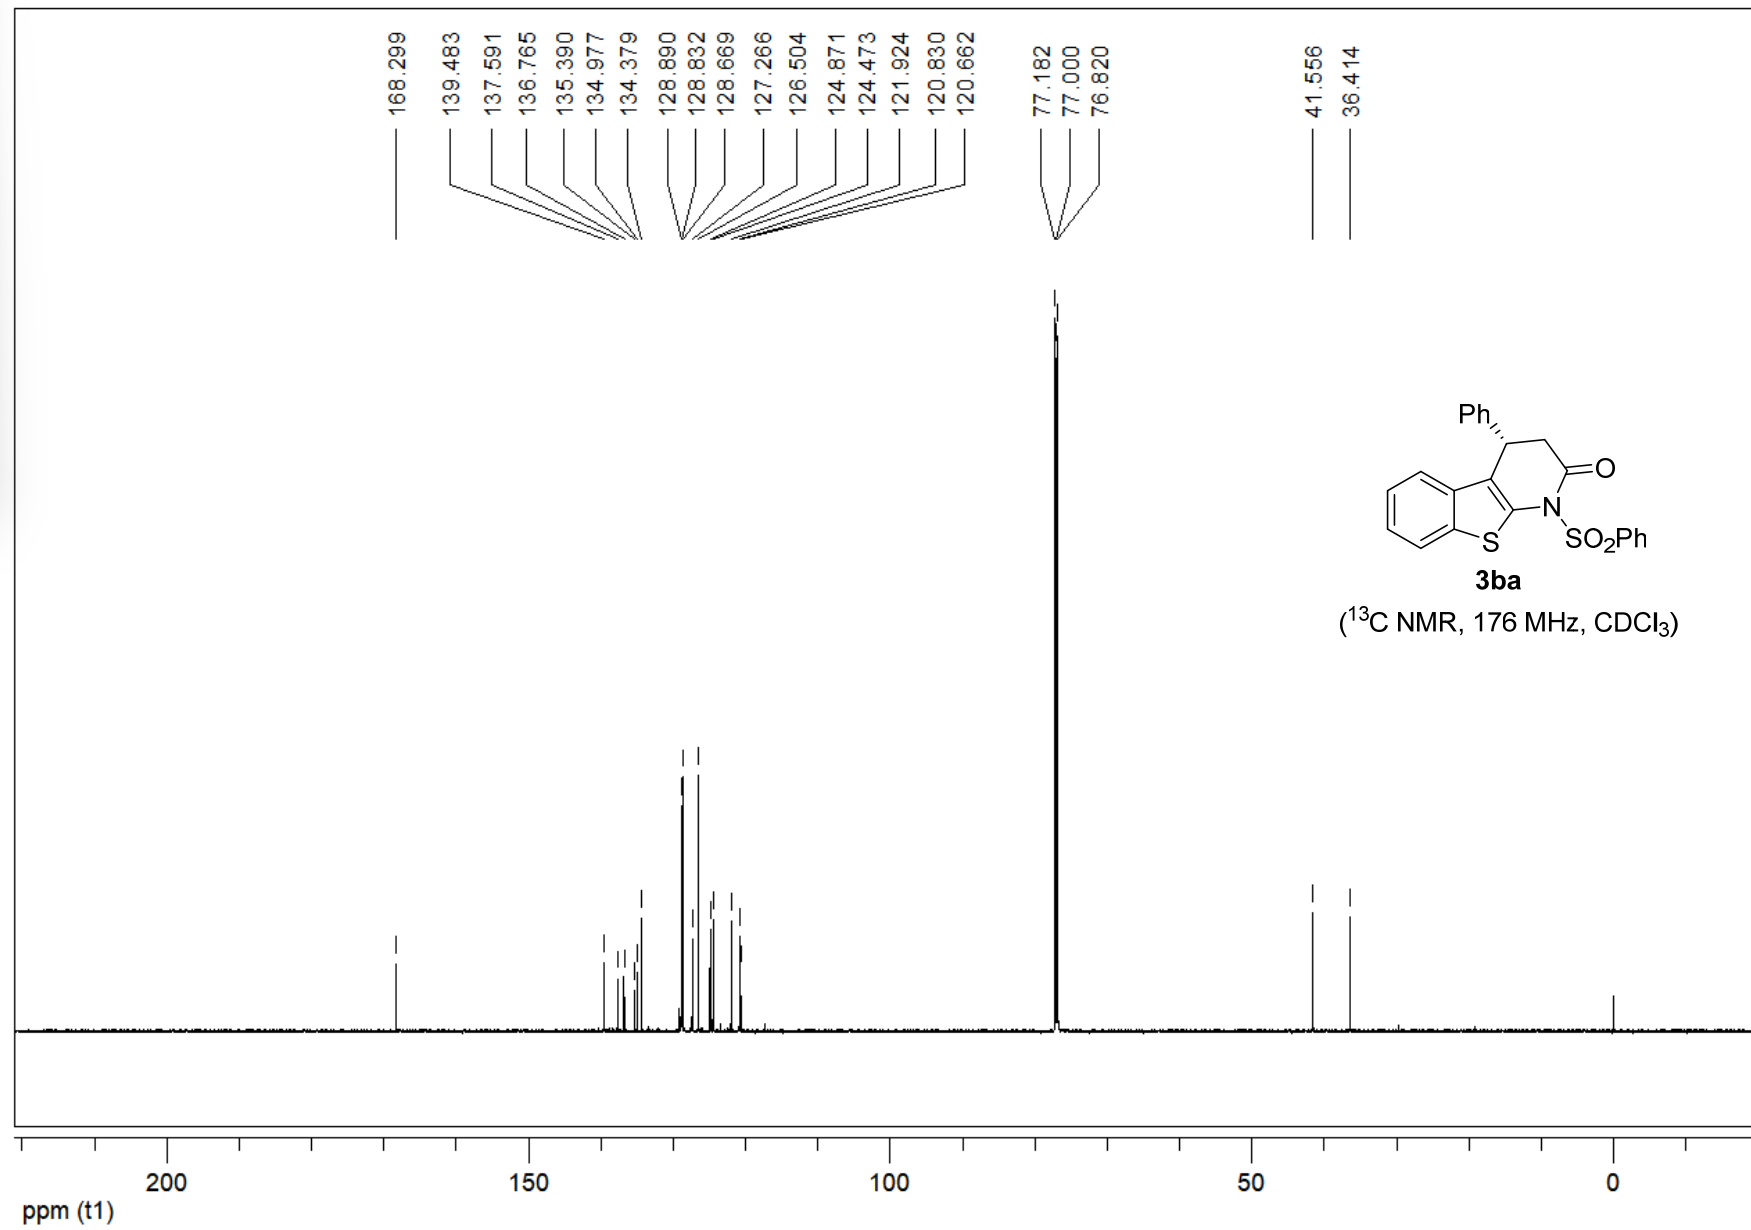

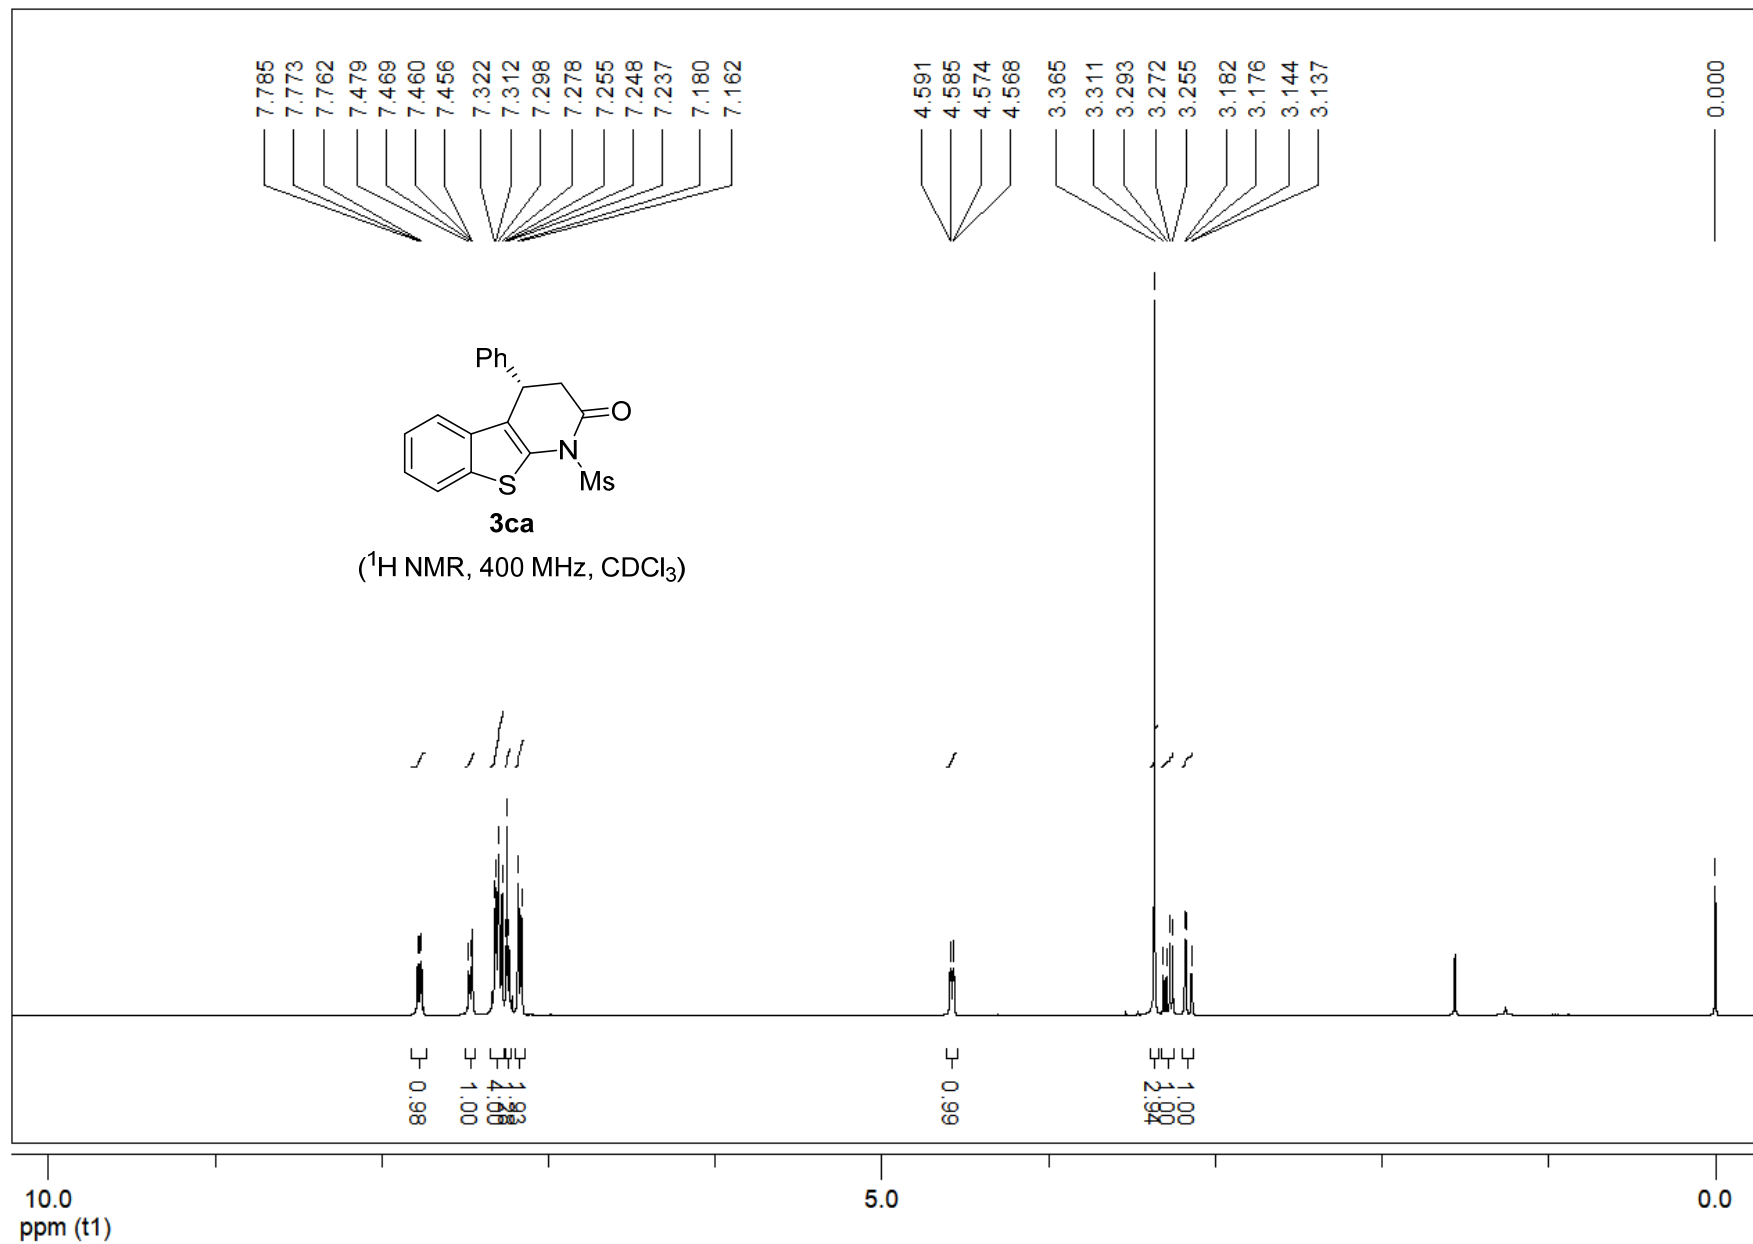

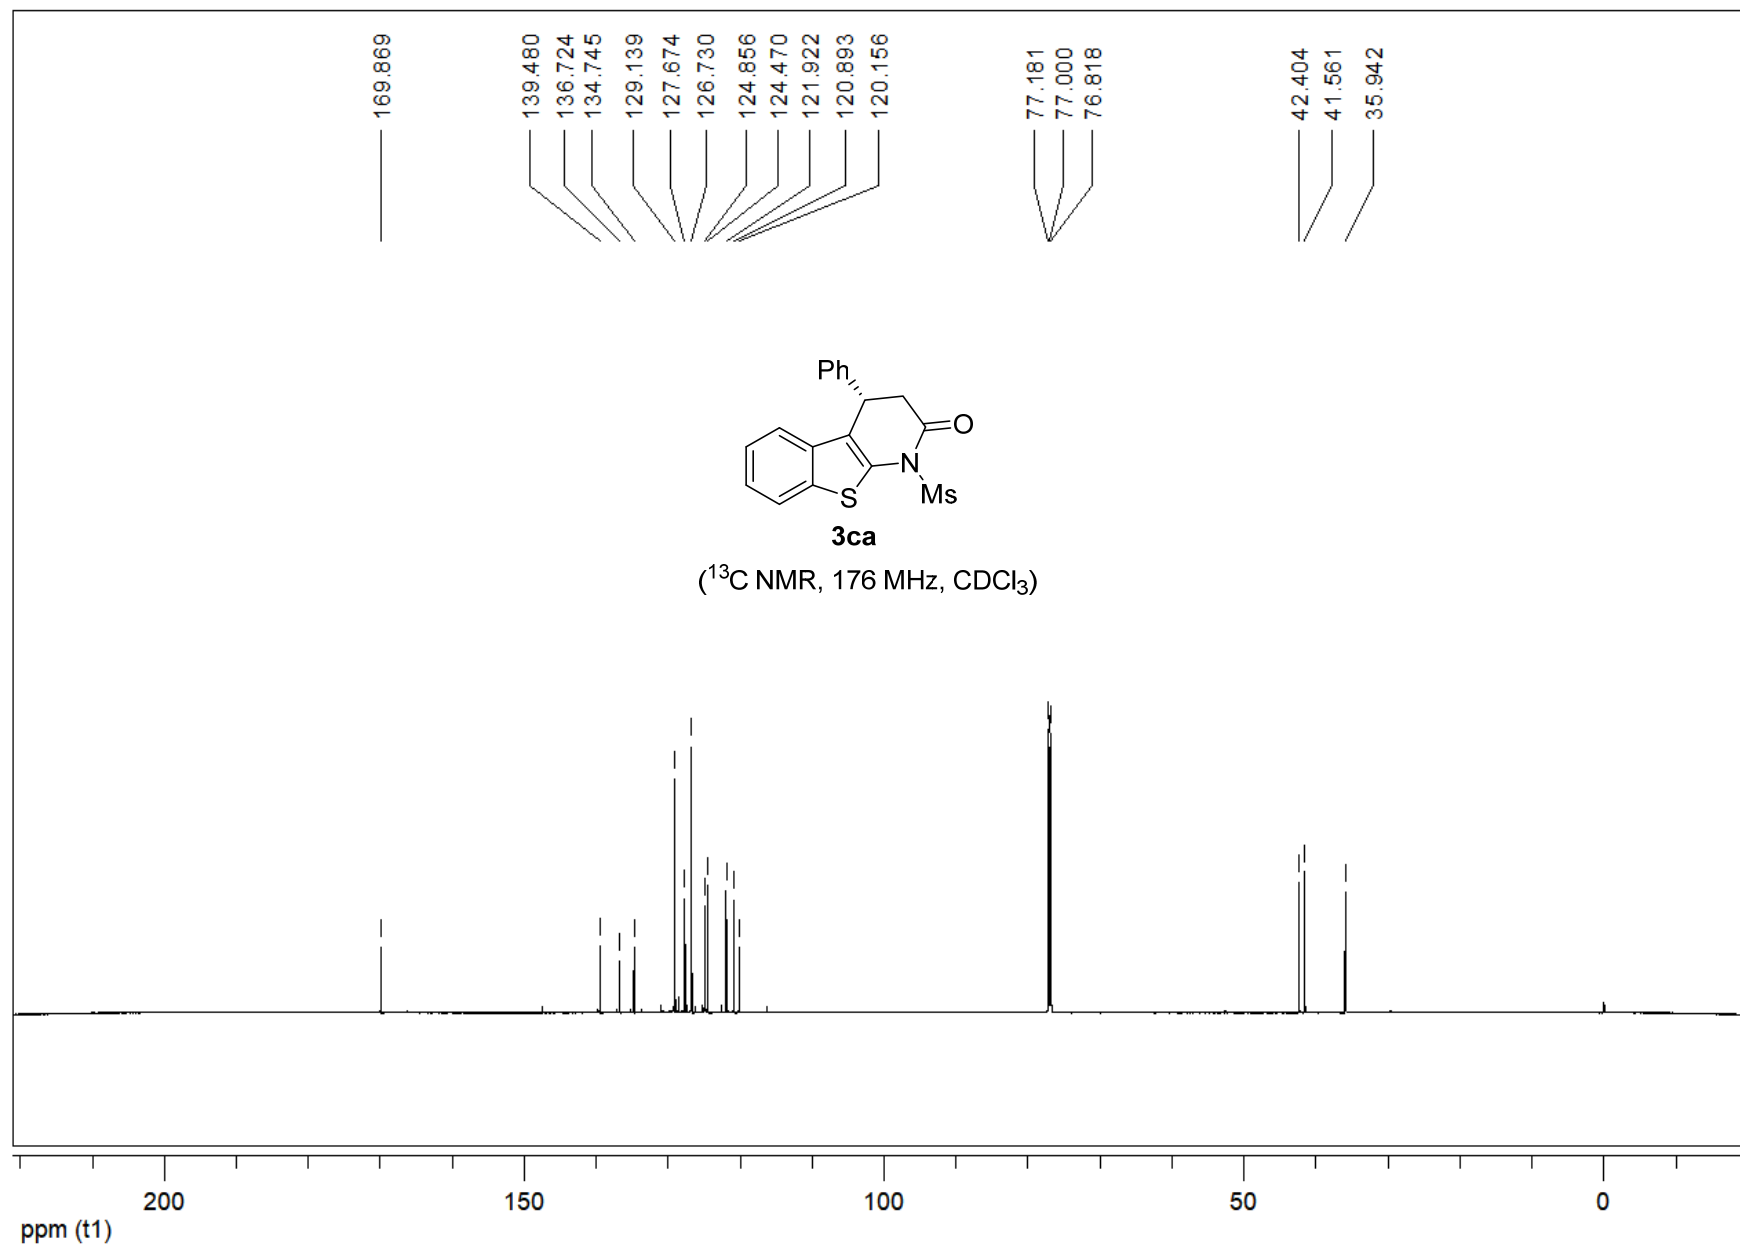

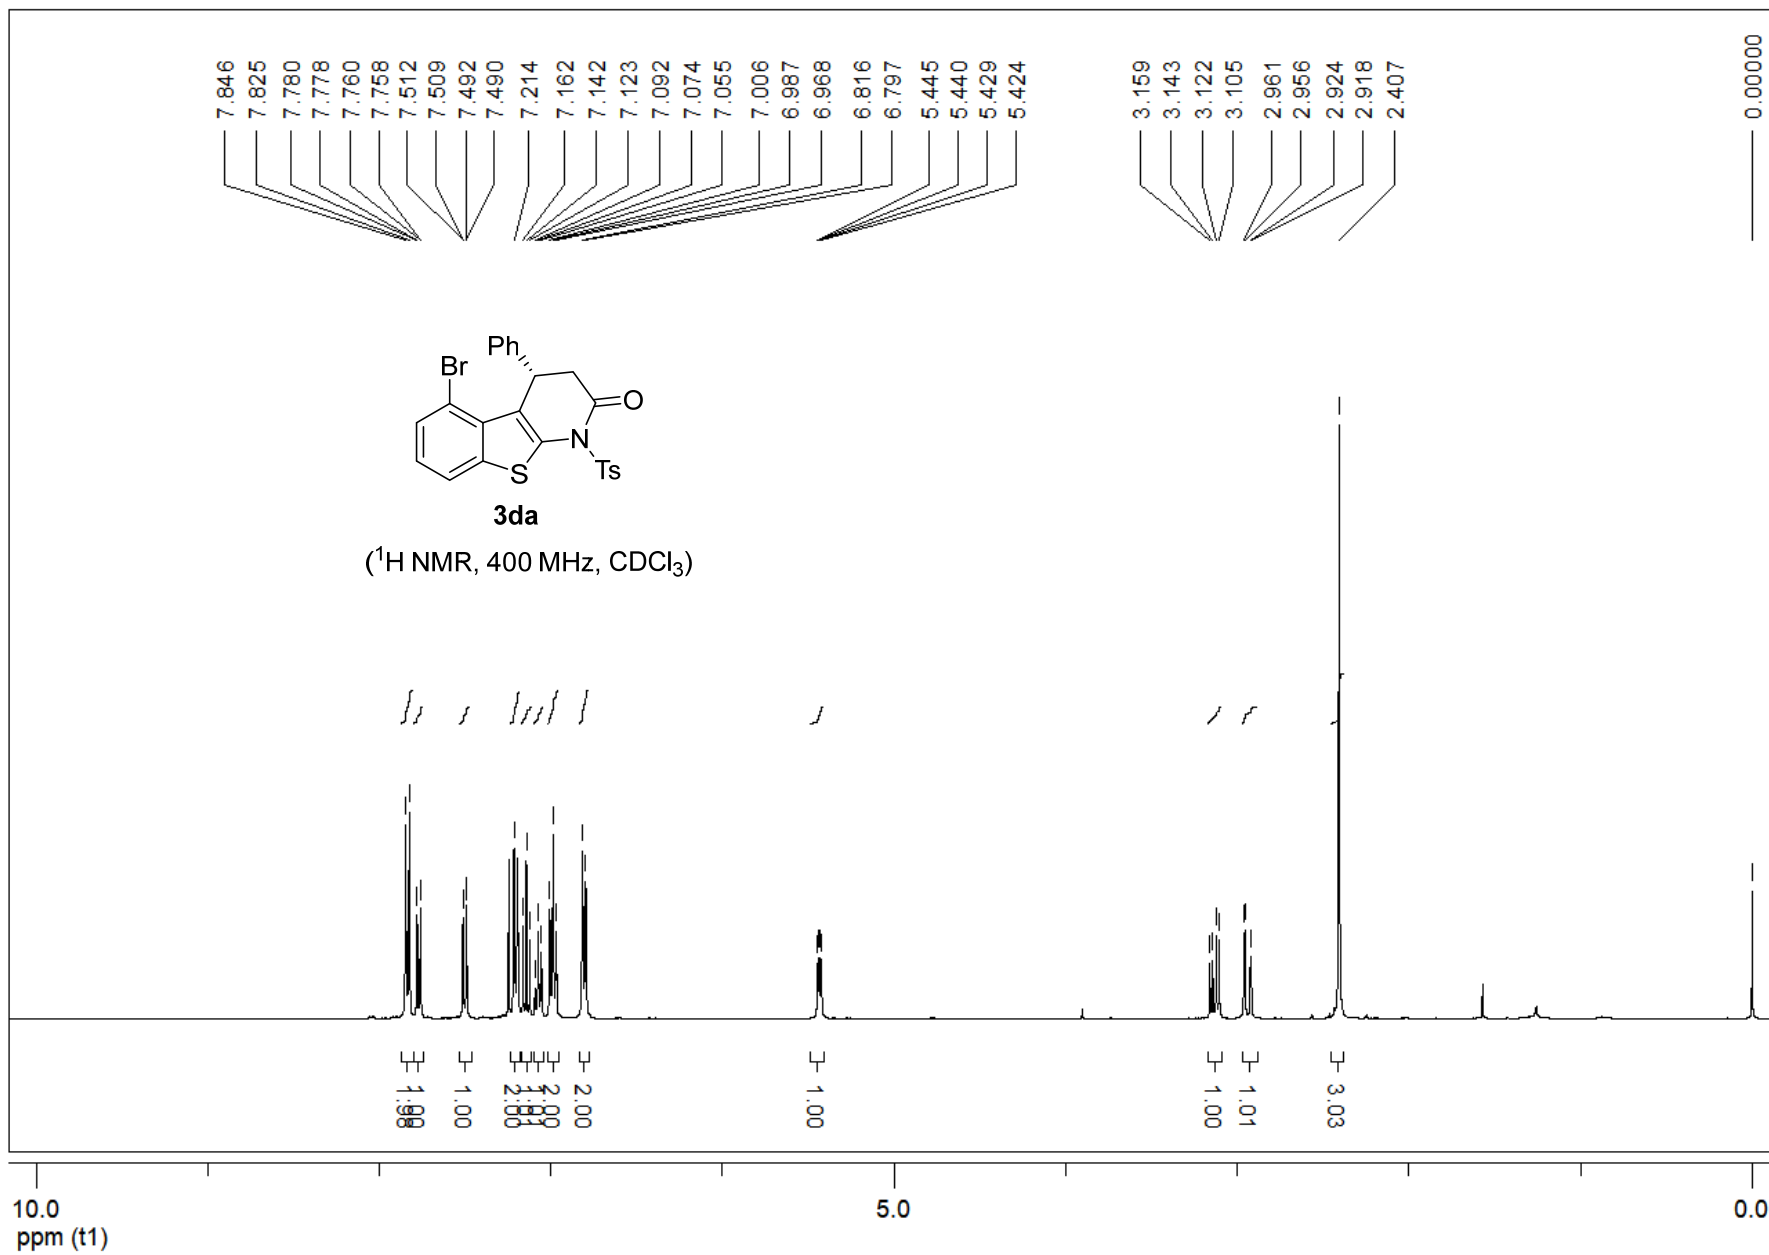

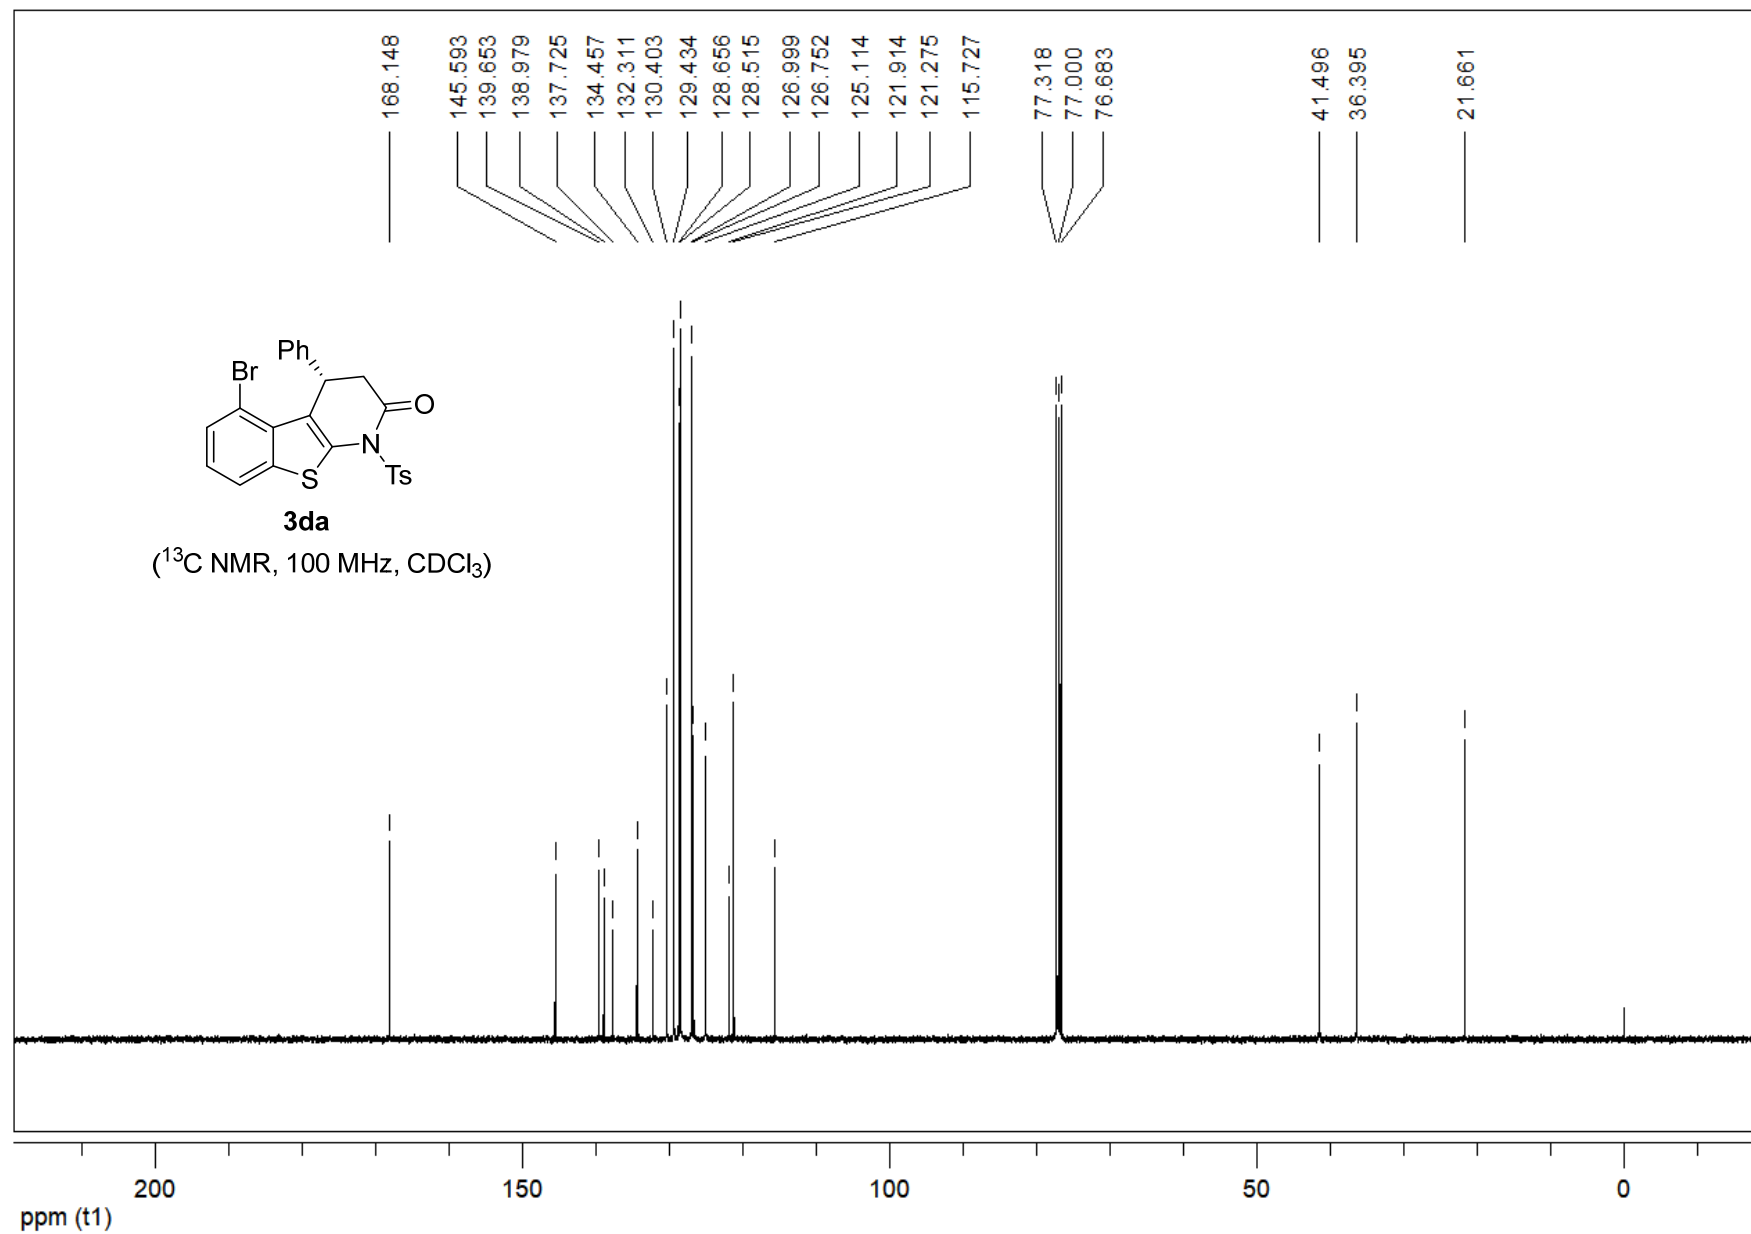

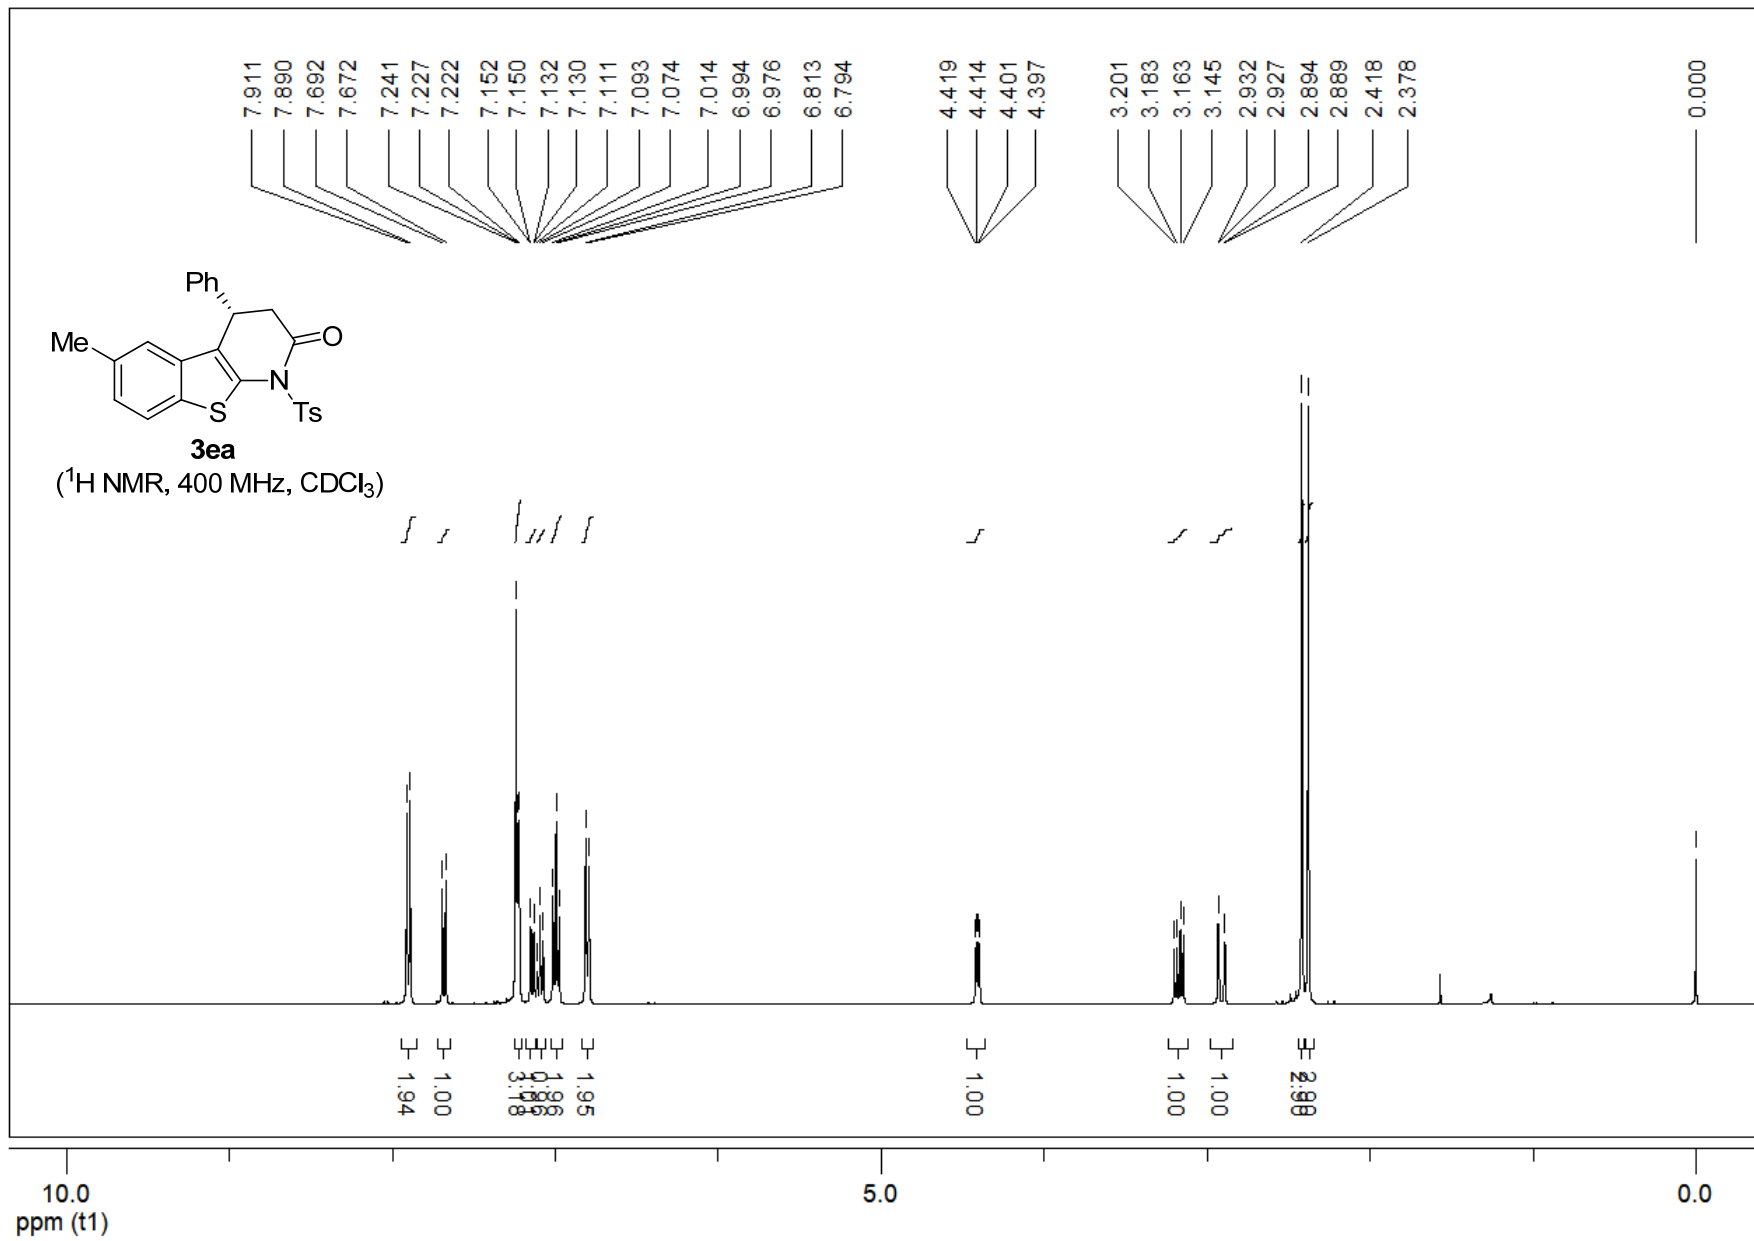



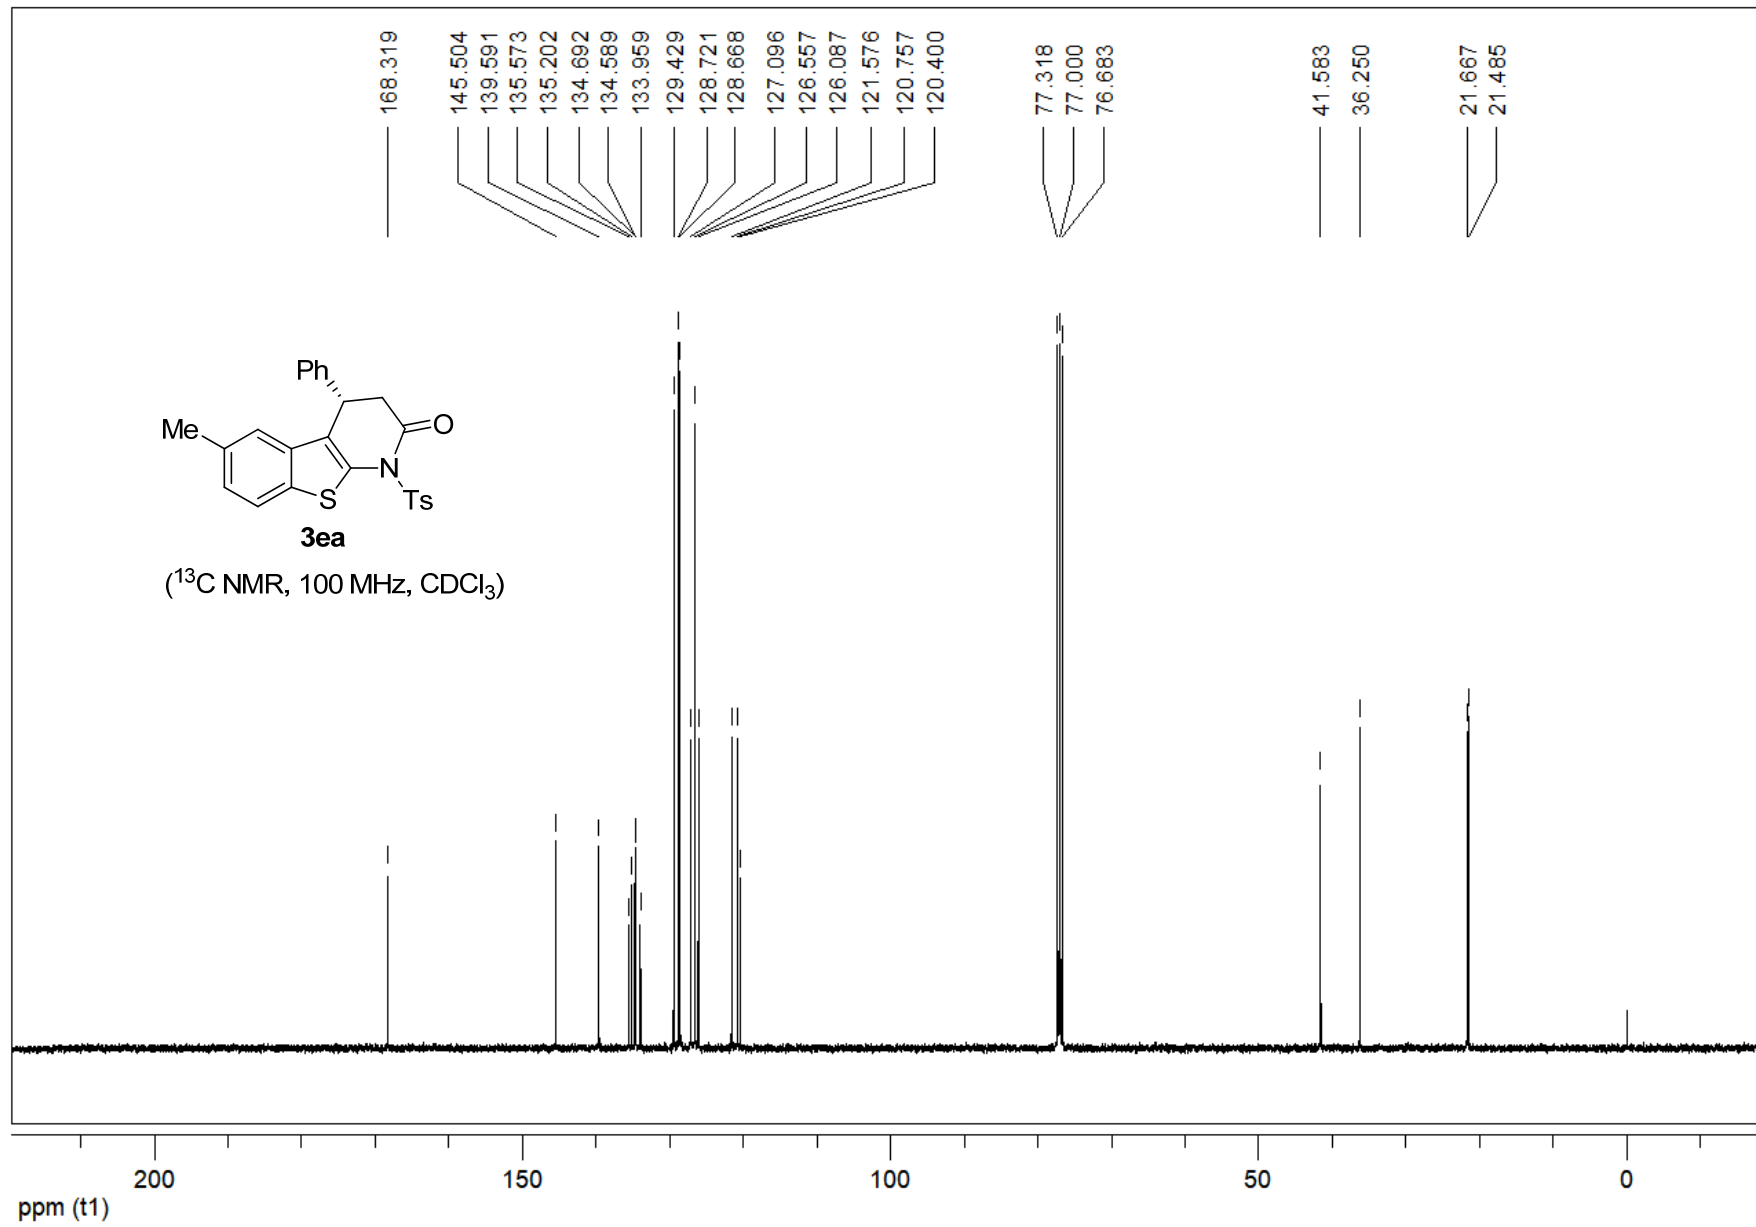

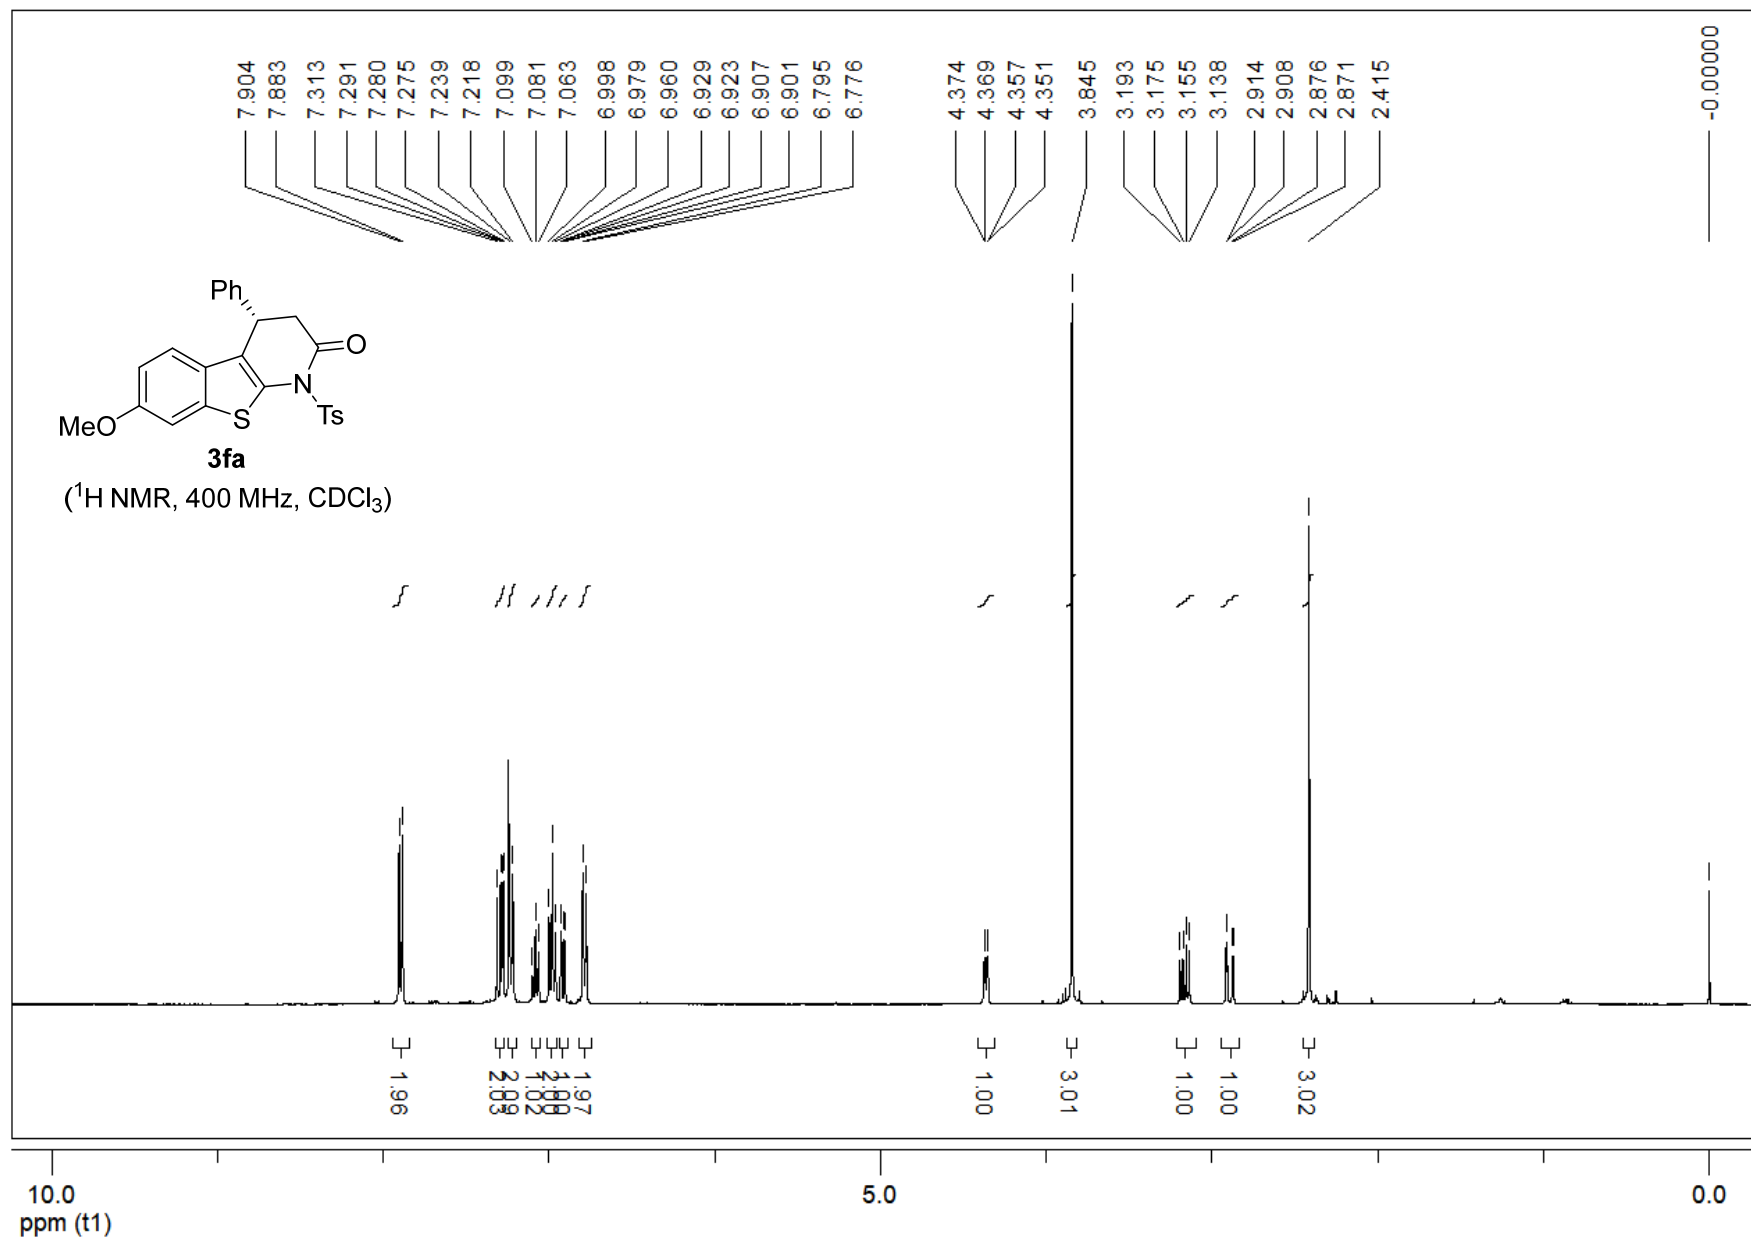

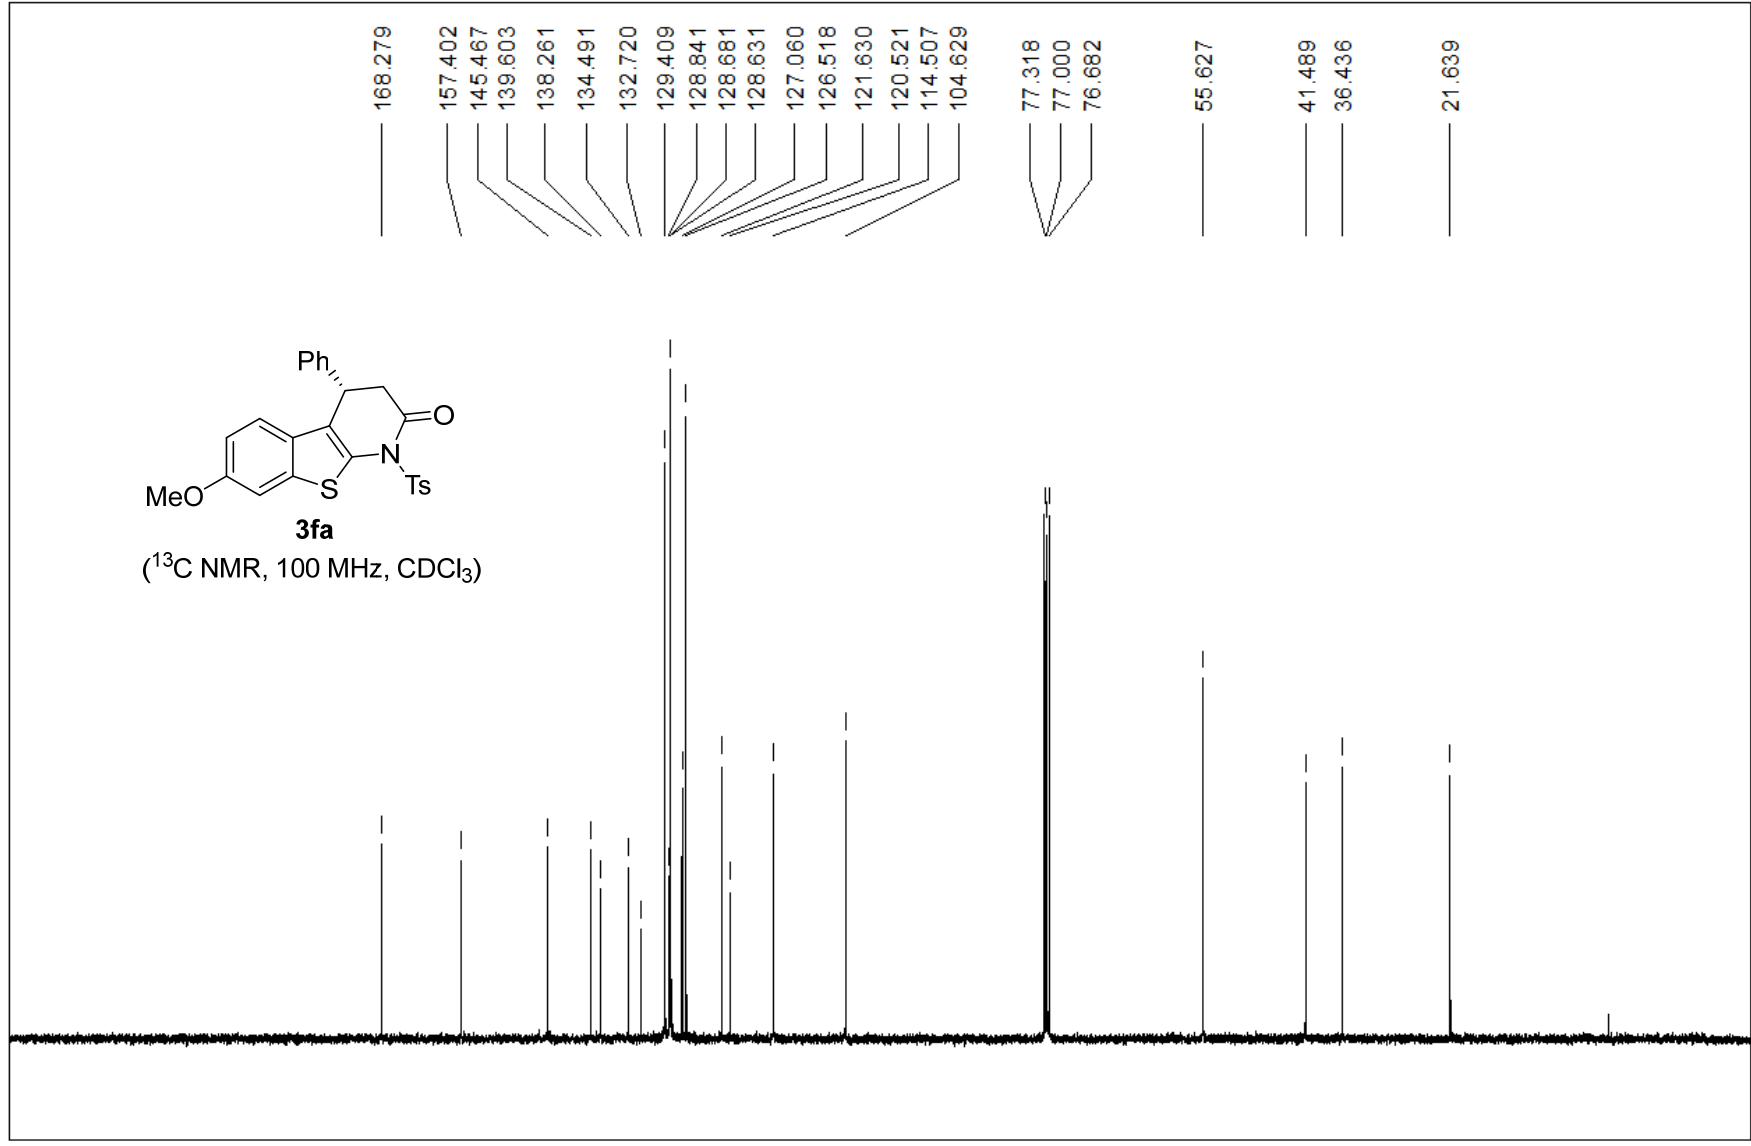

ppm (t1)

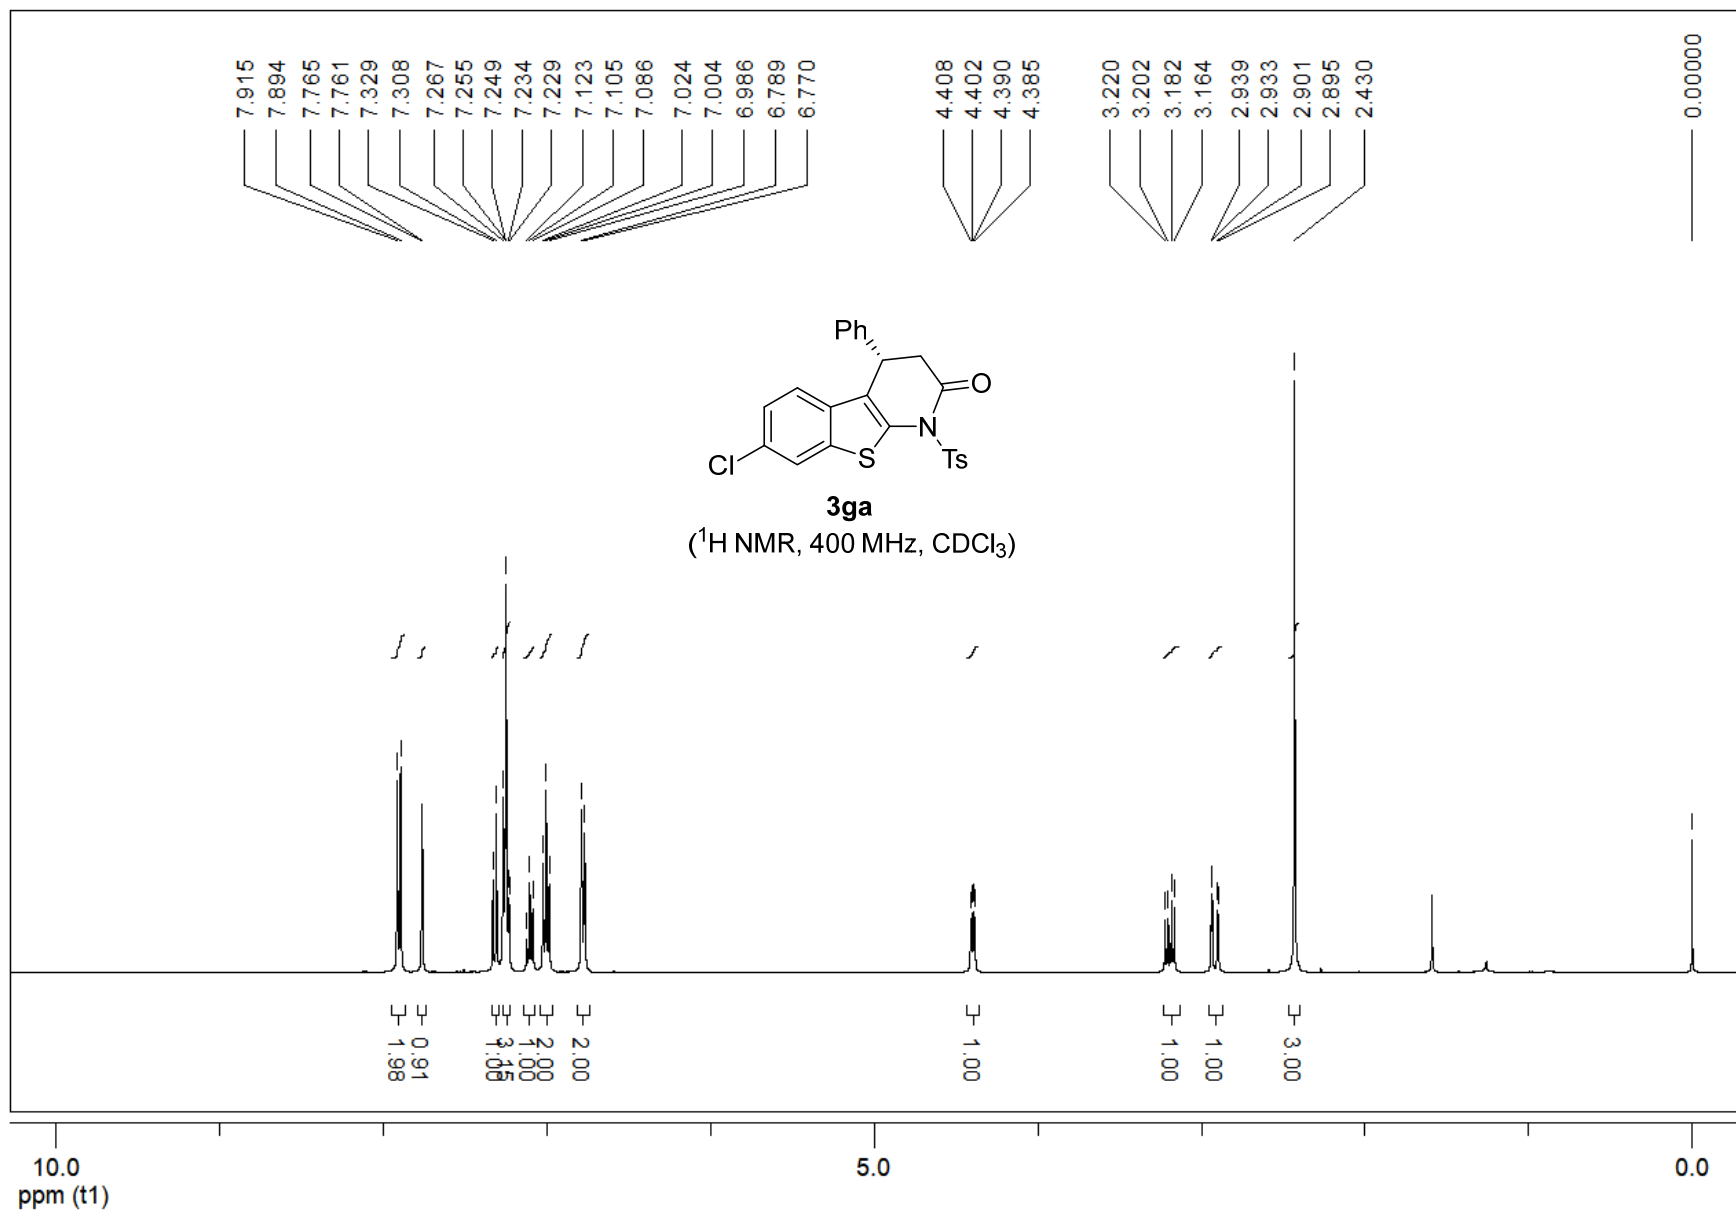

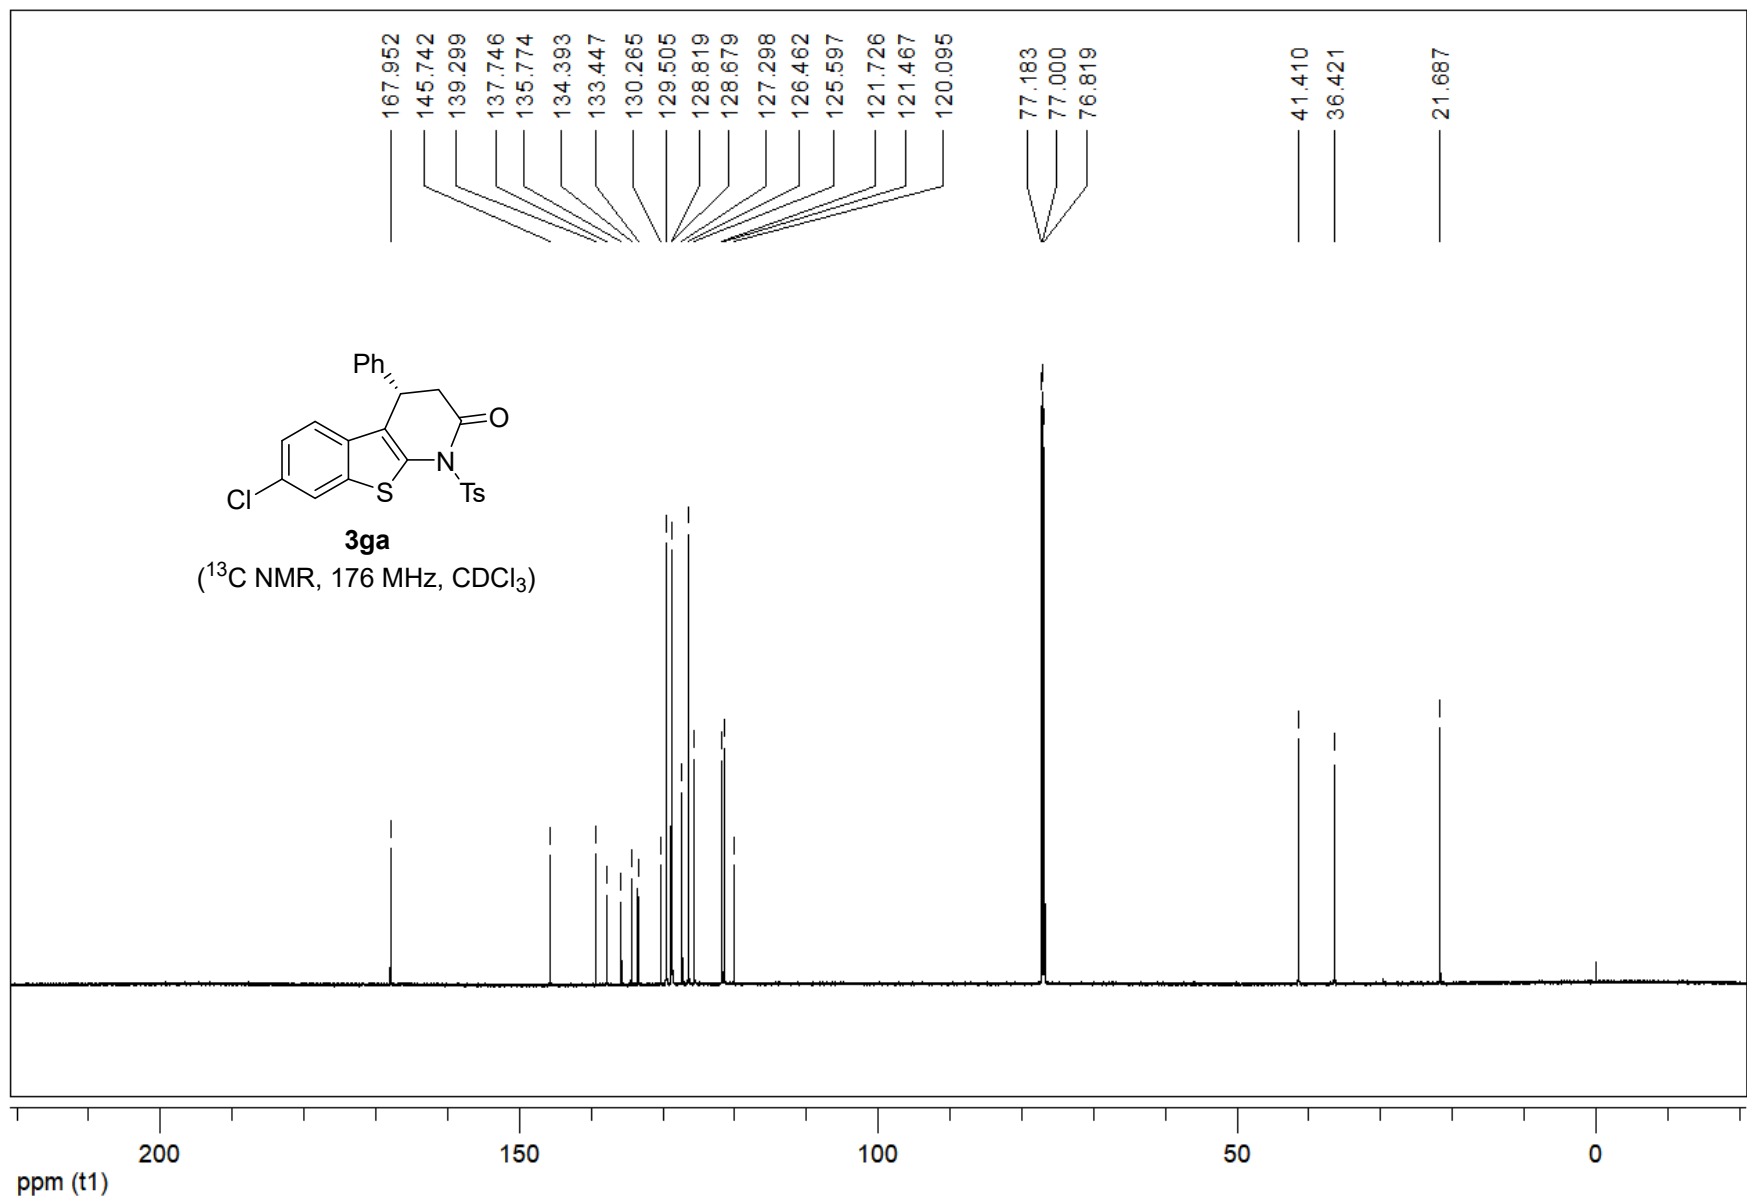

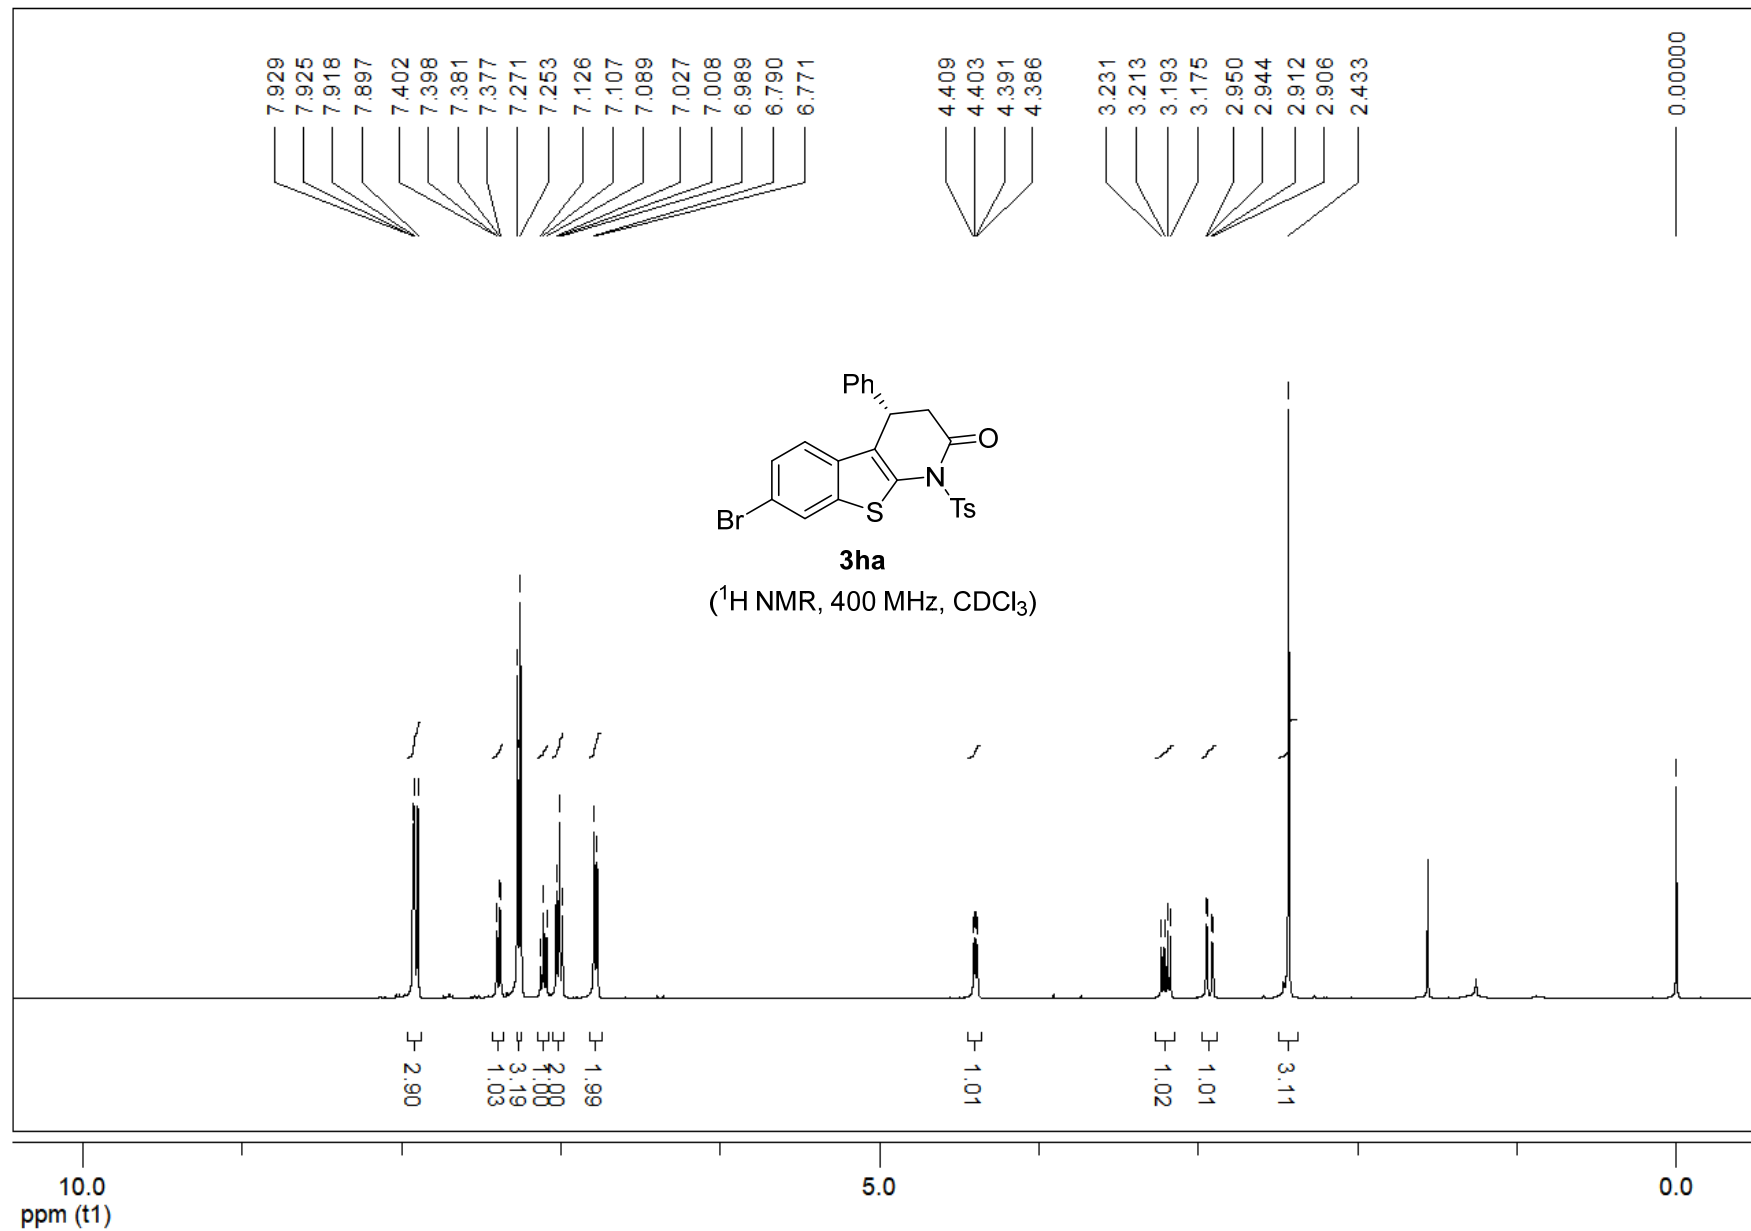

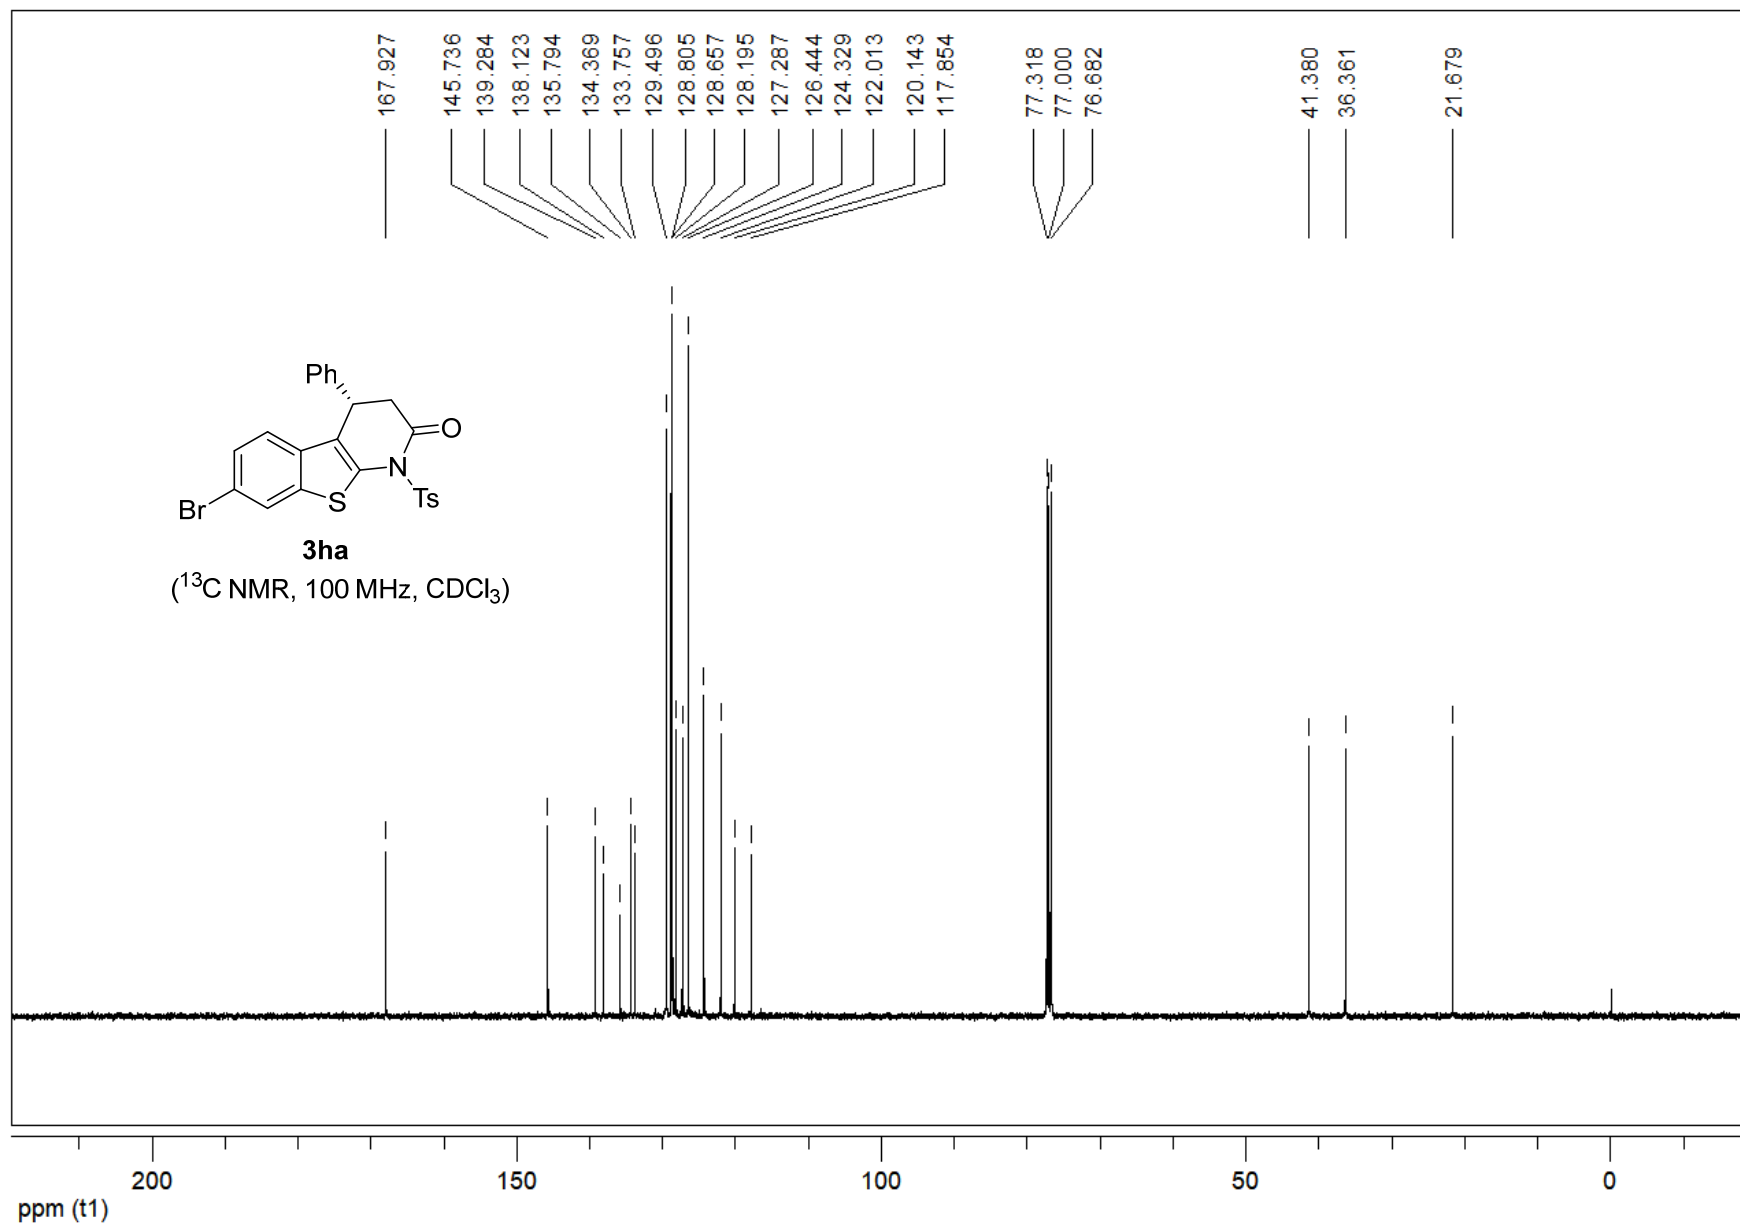

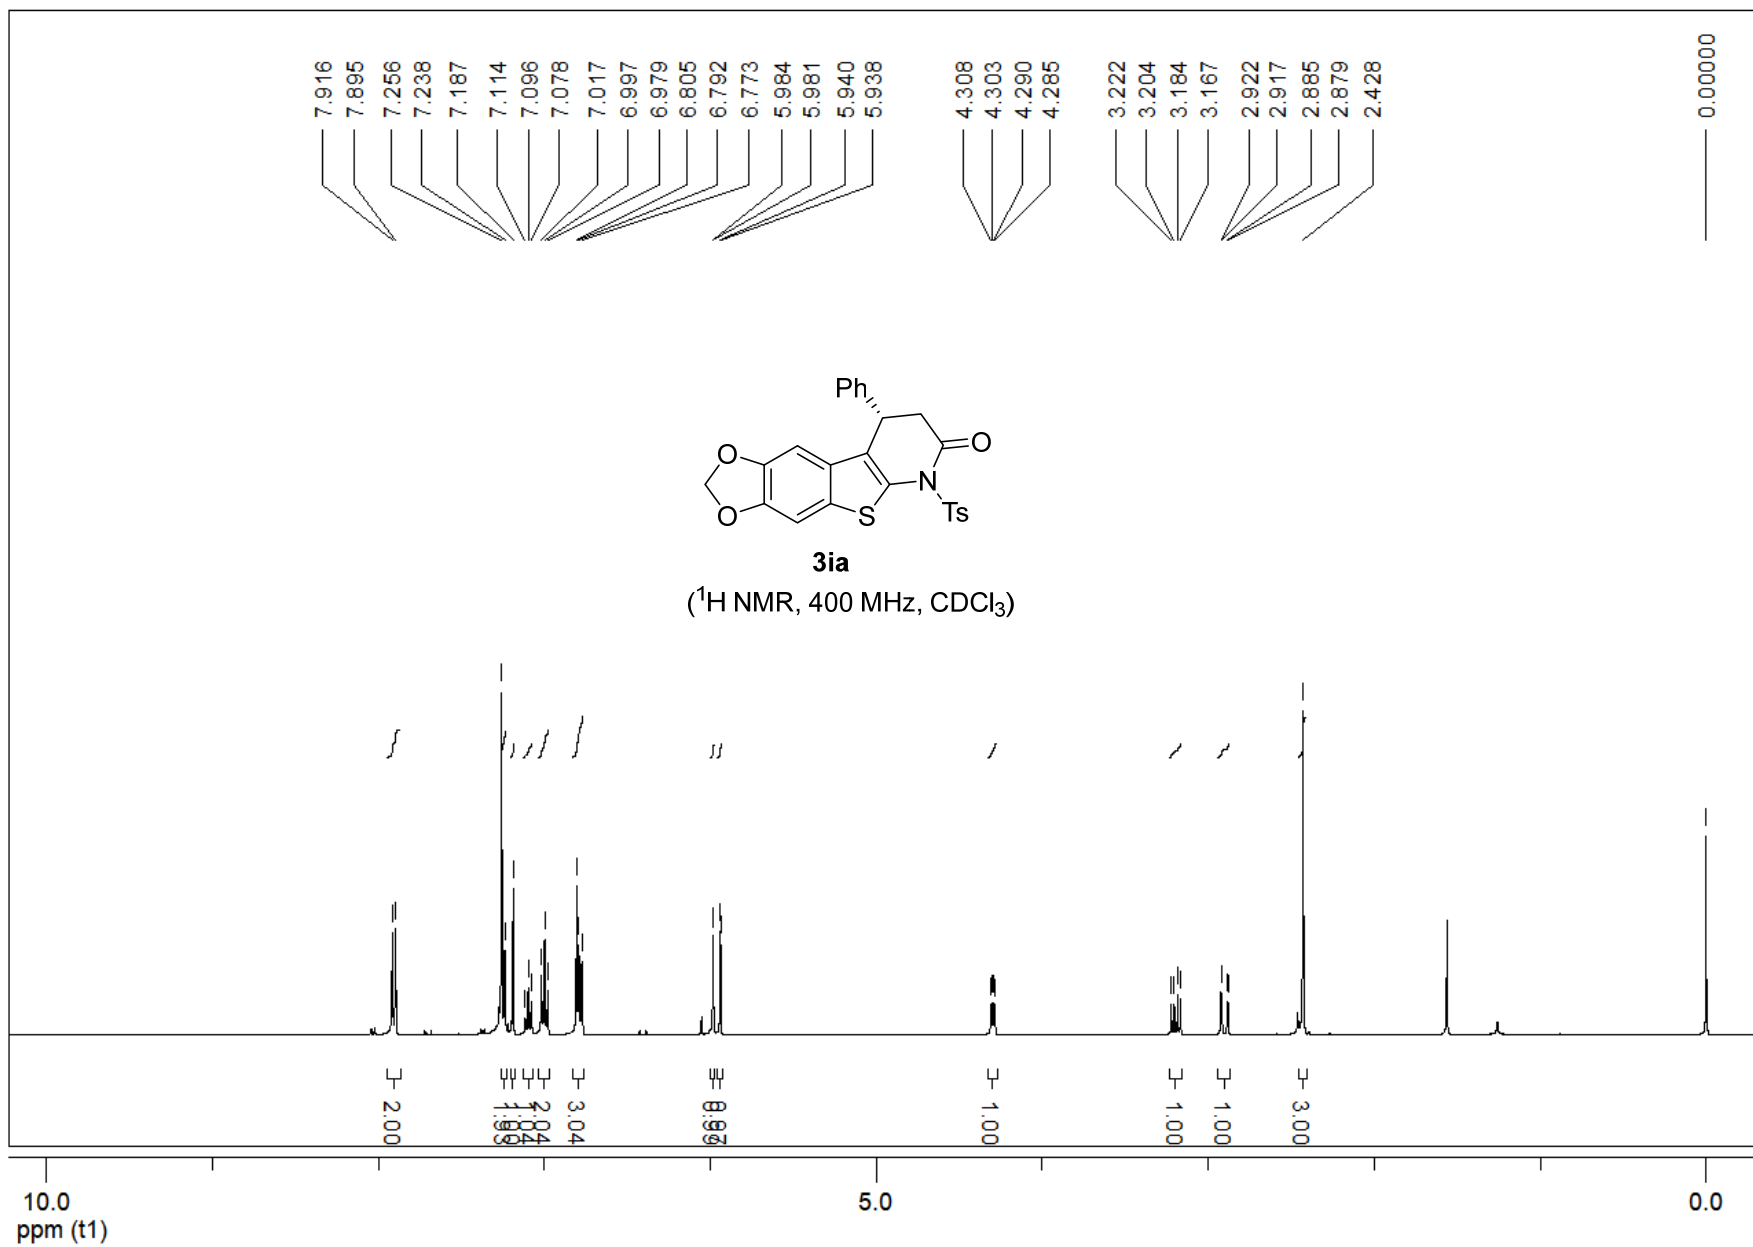



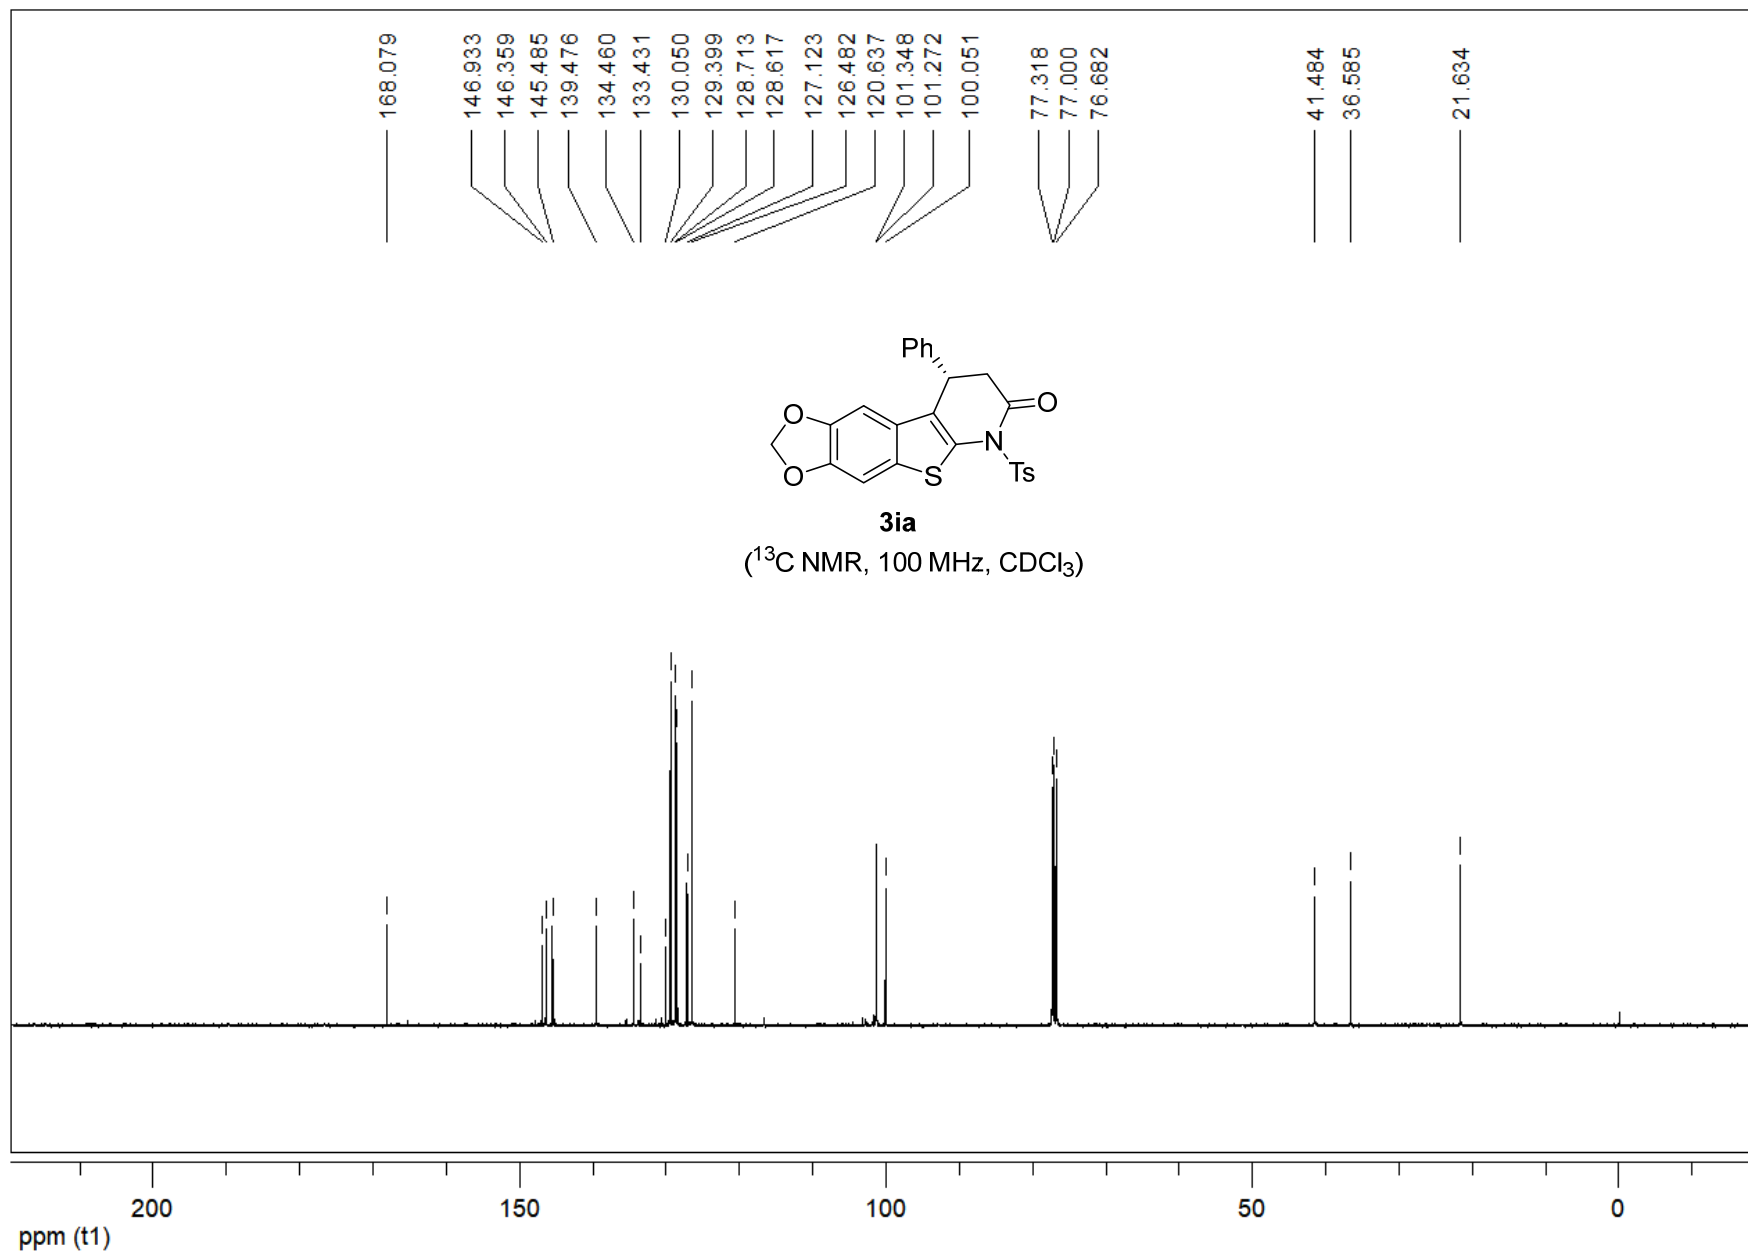

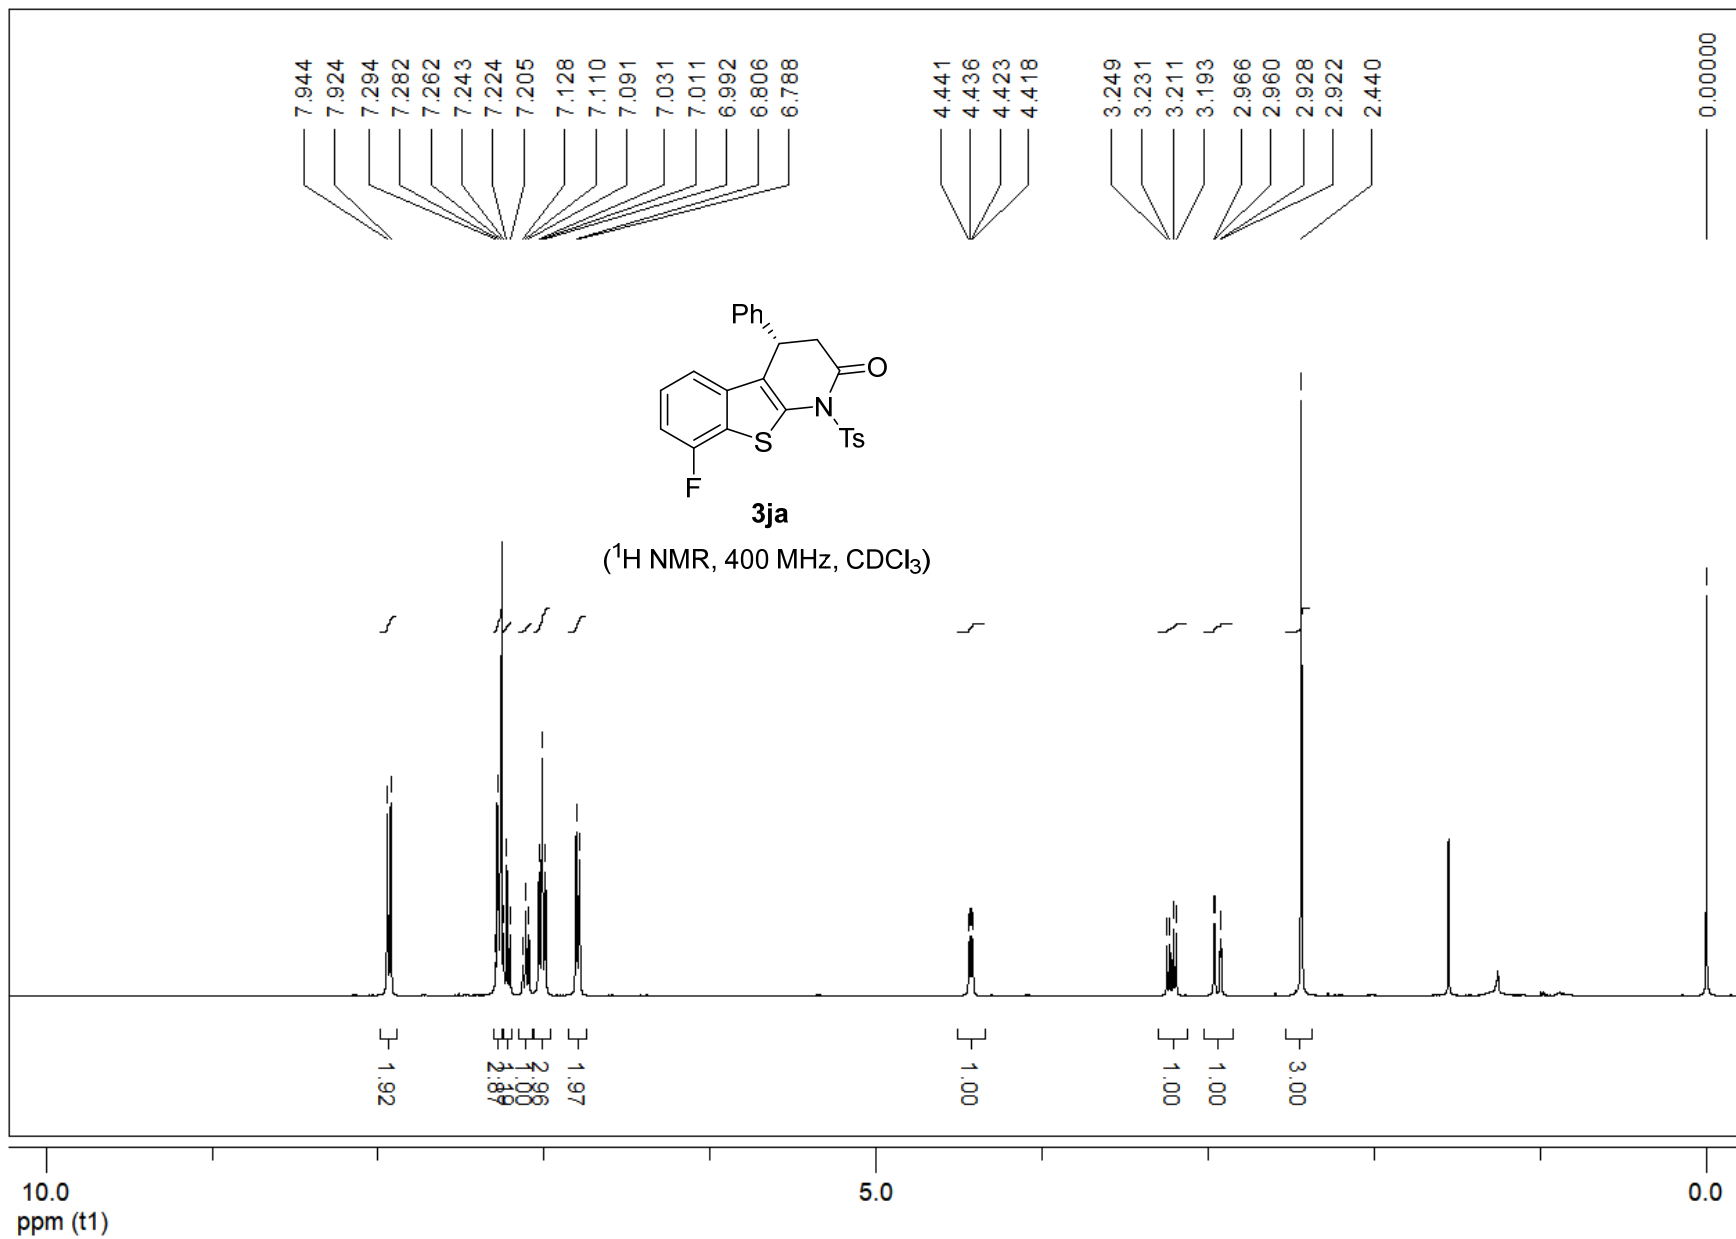

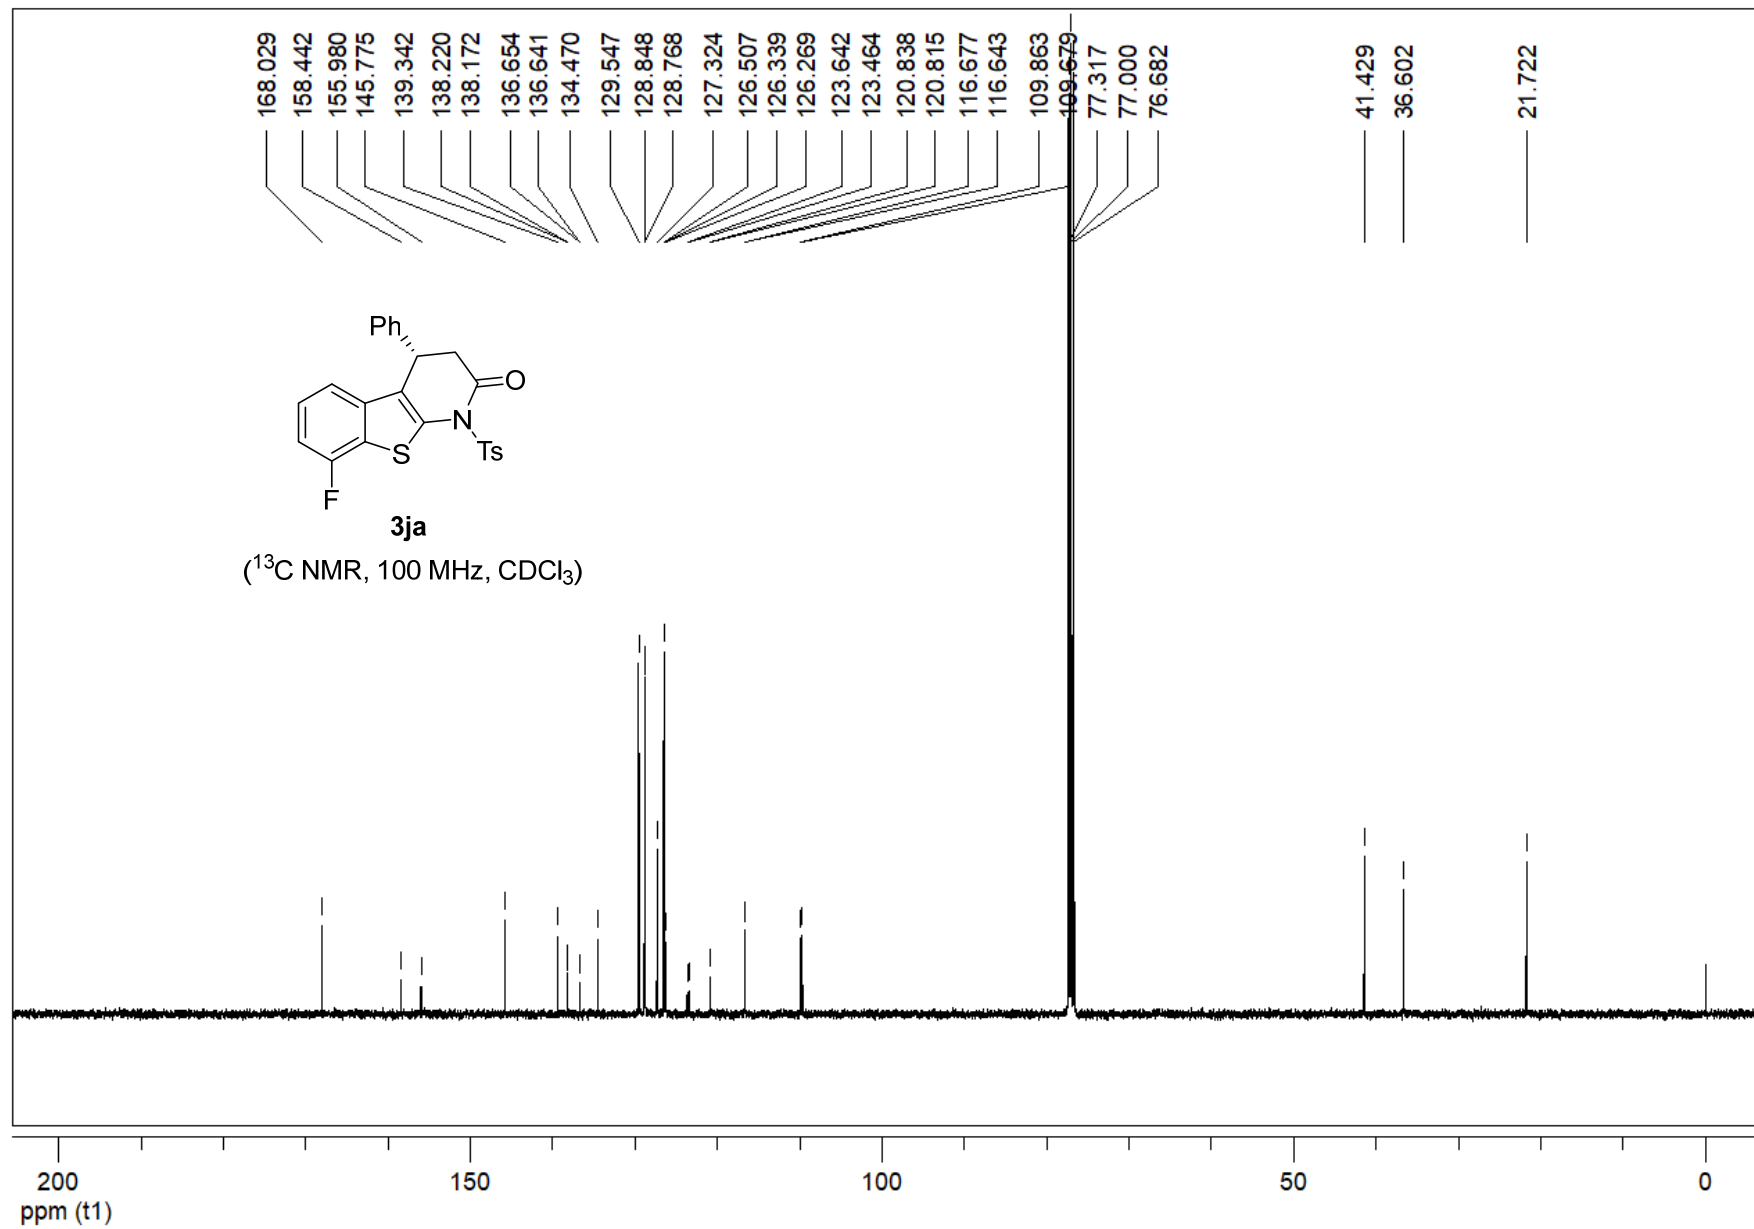

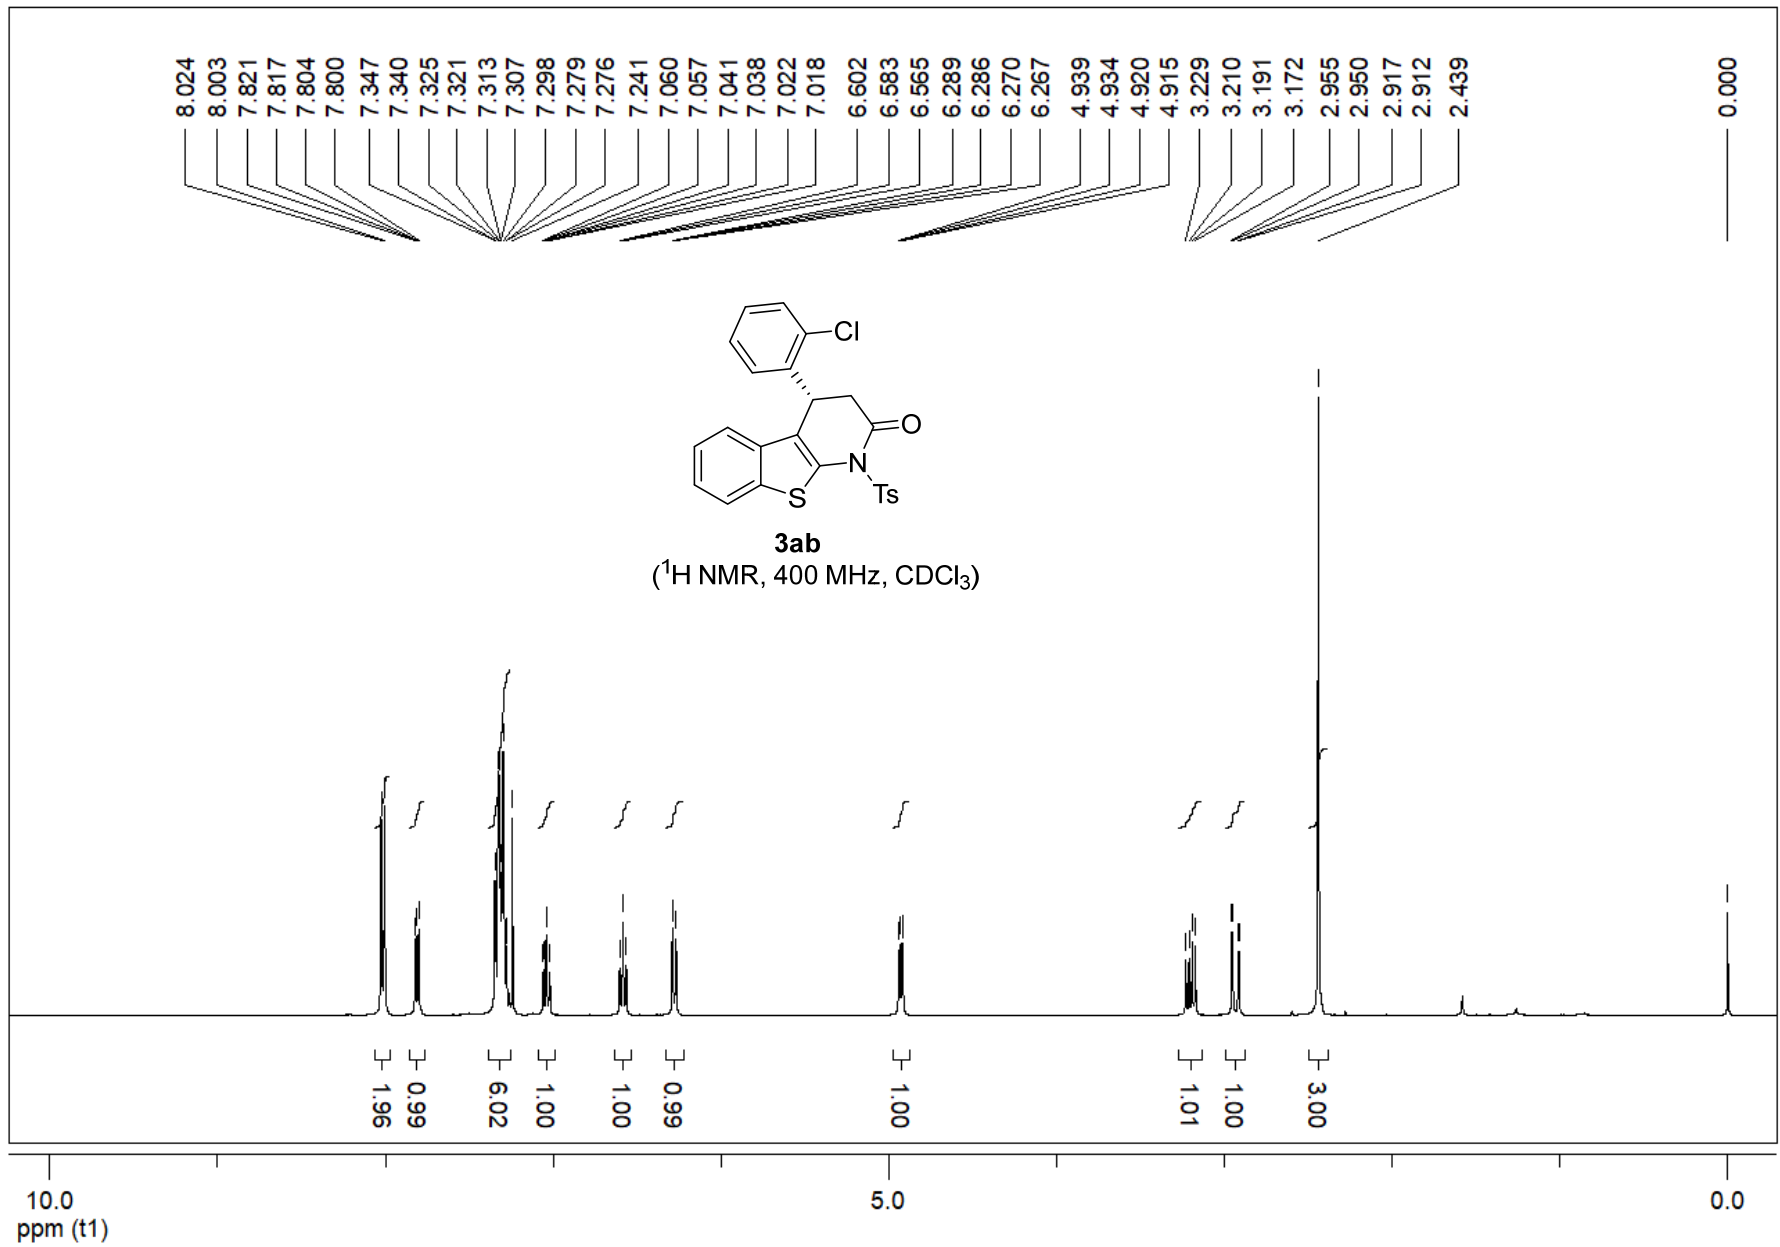

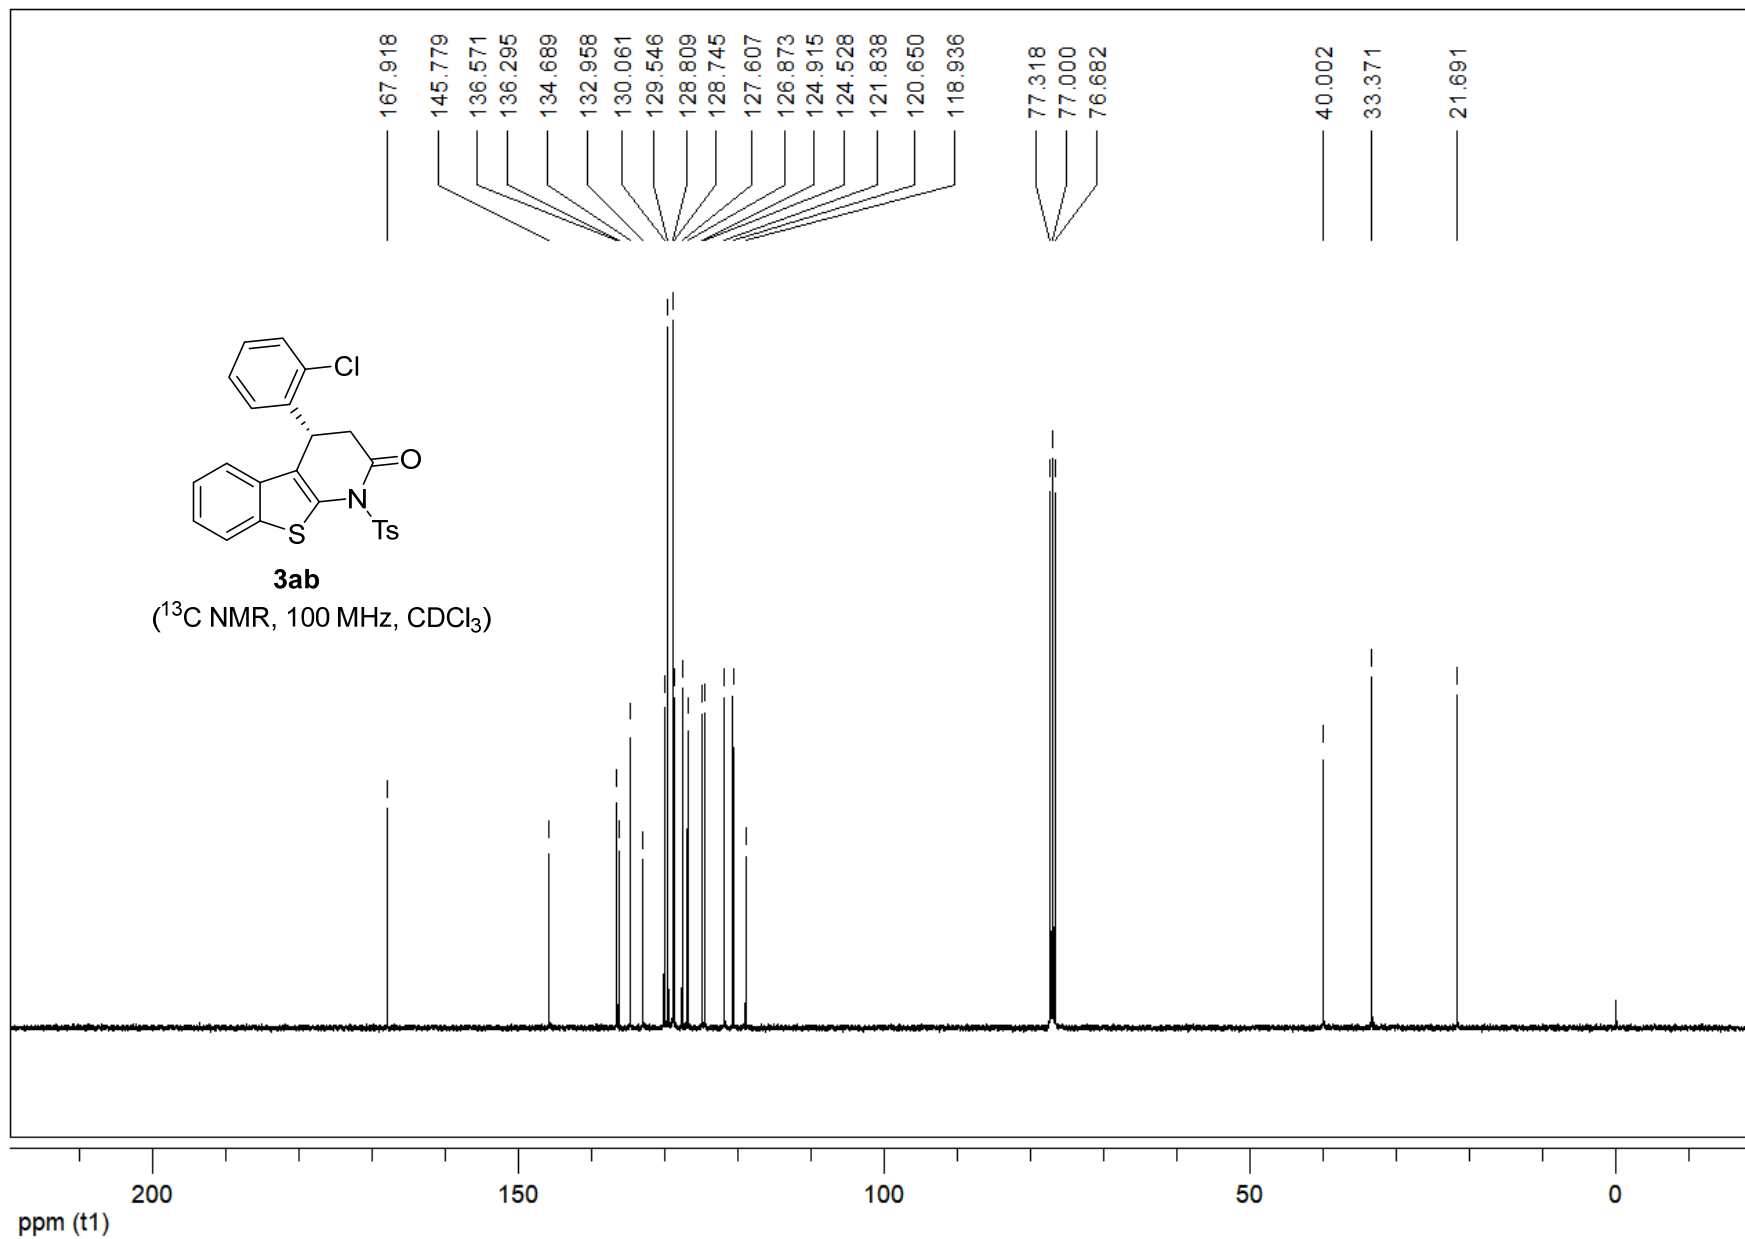

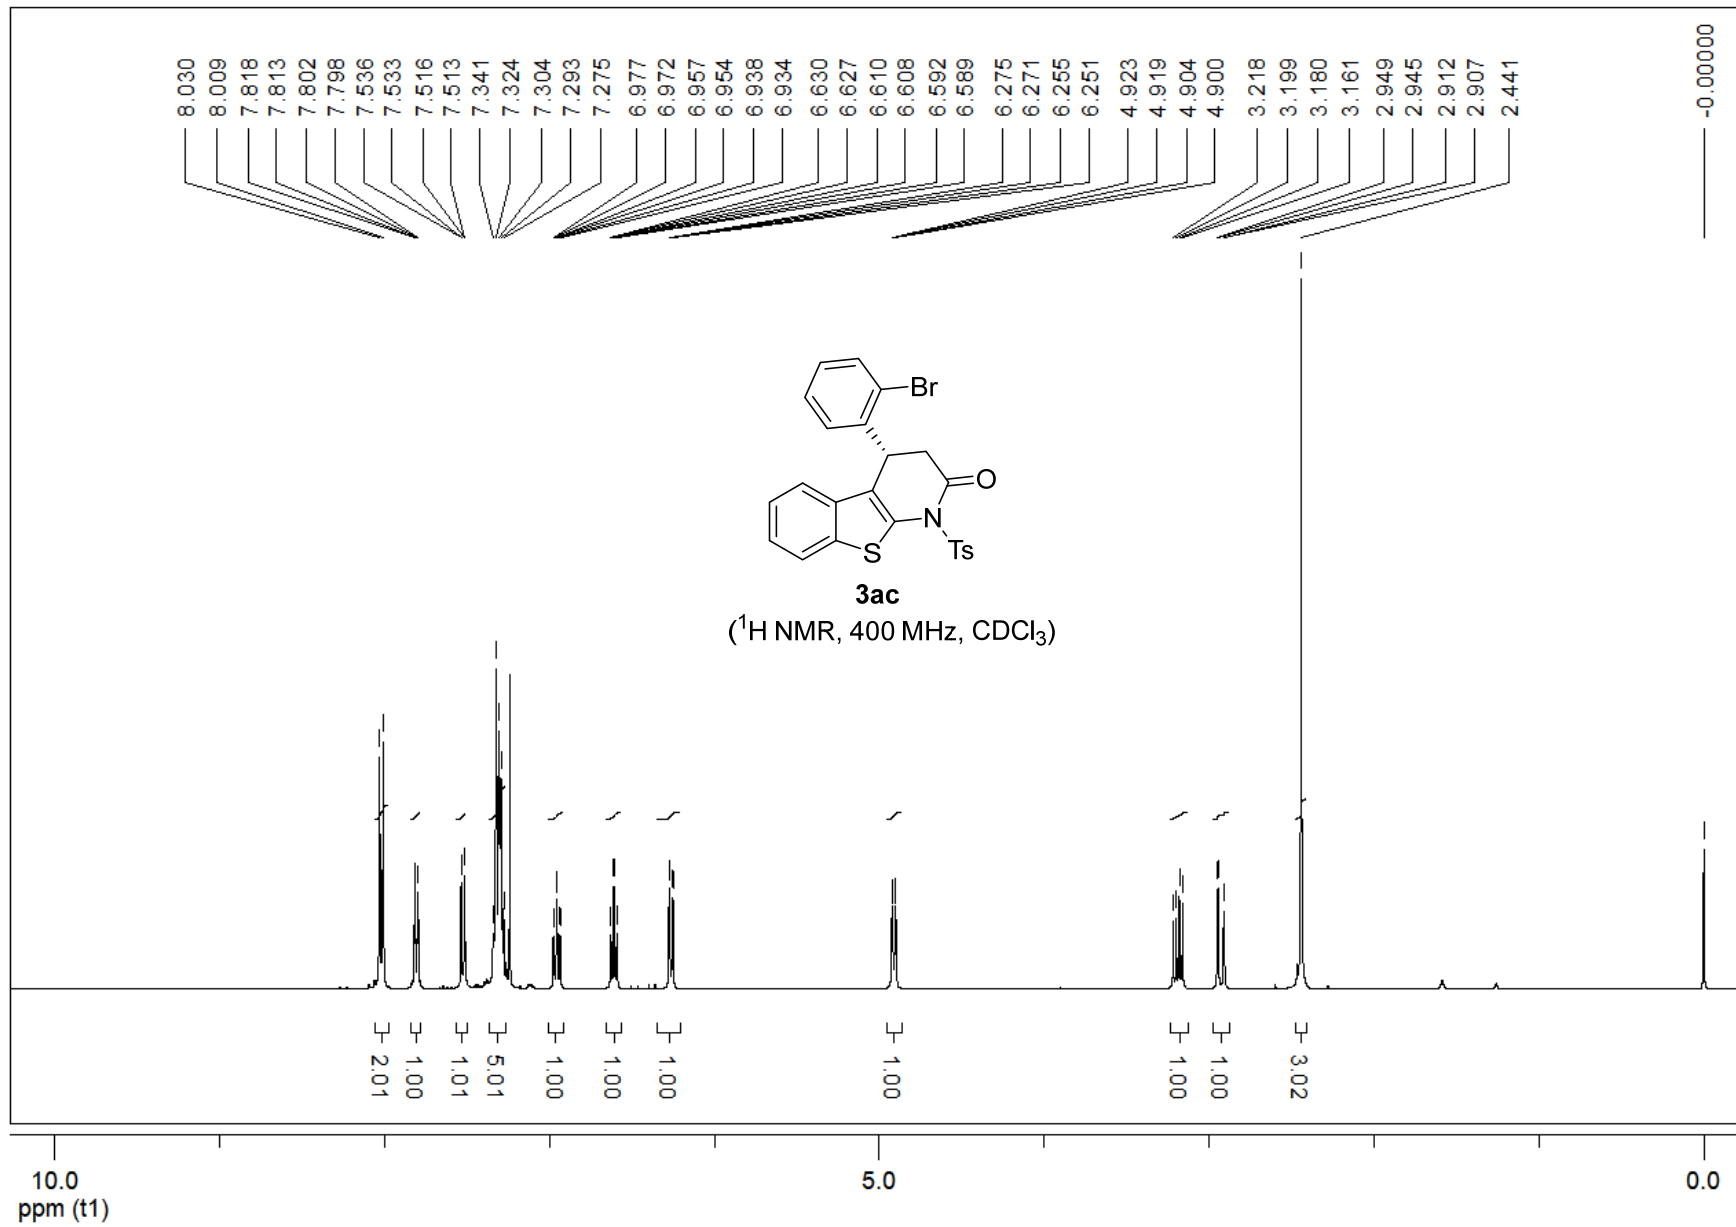

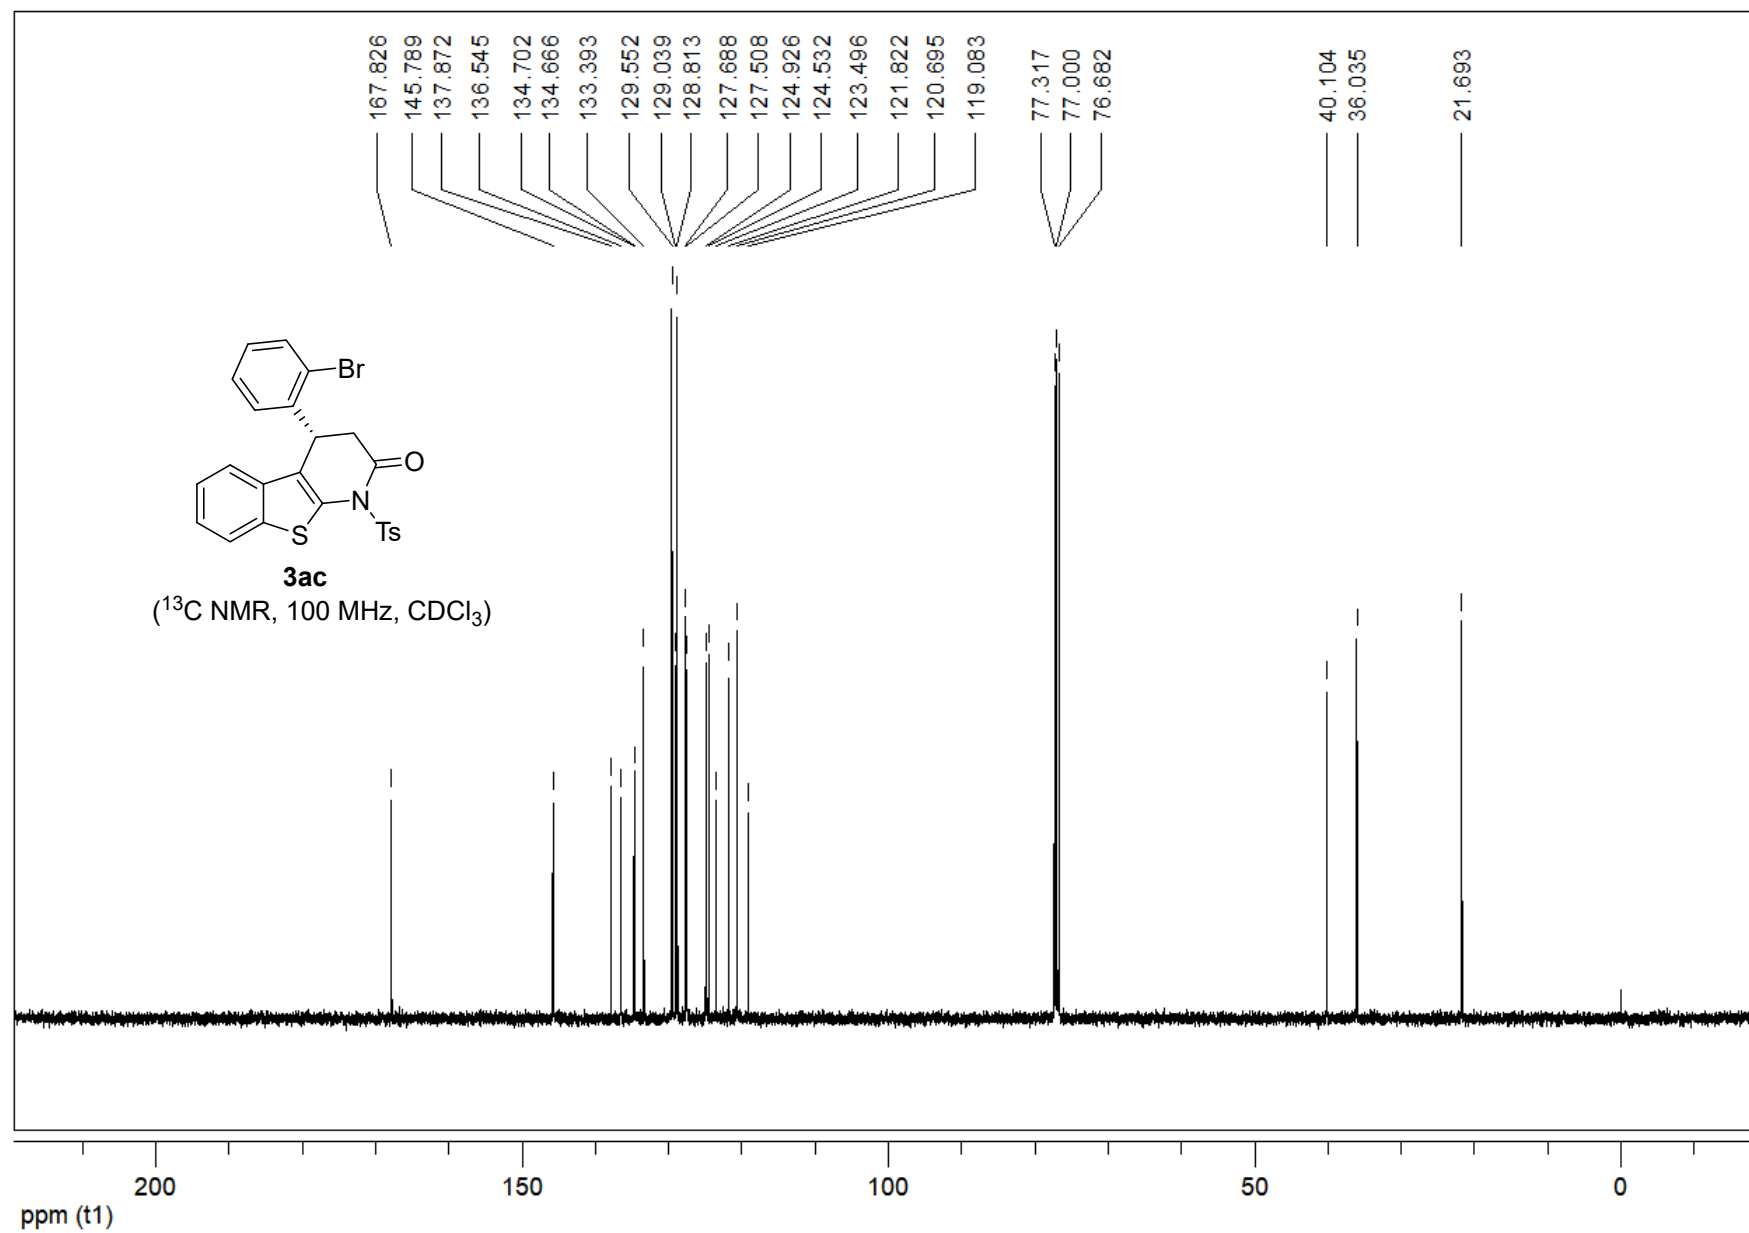

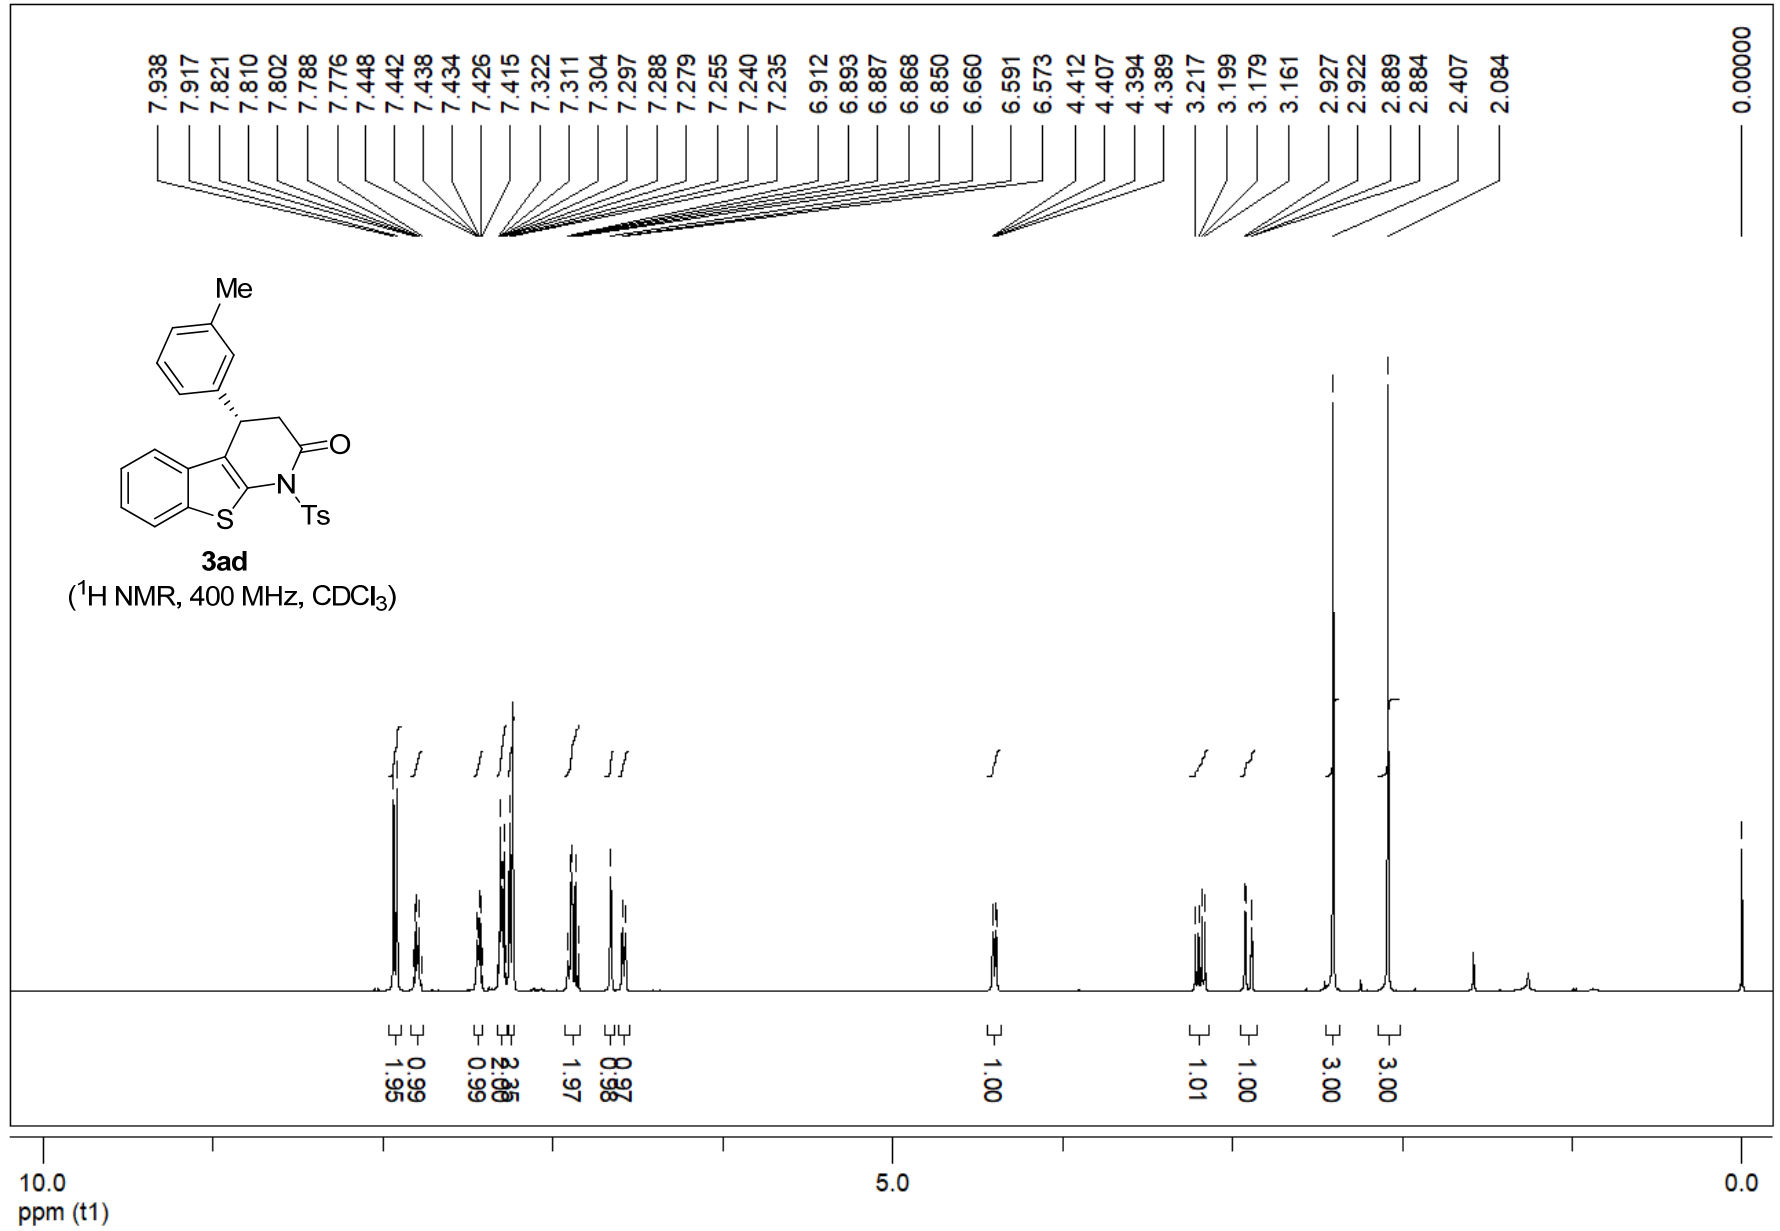



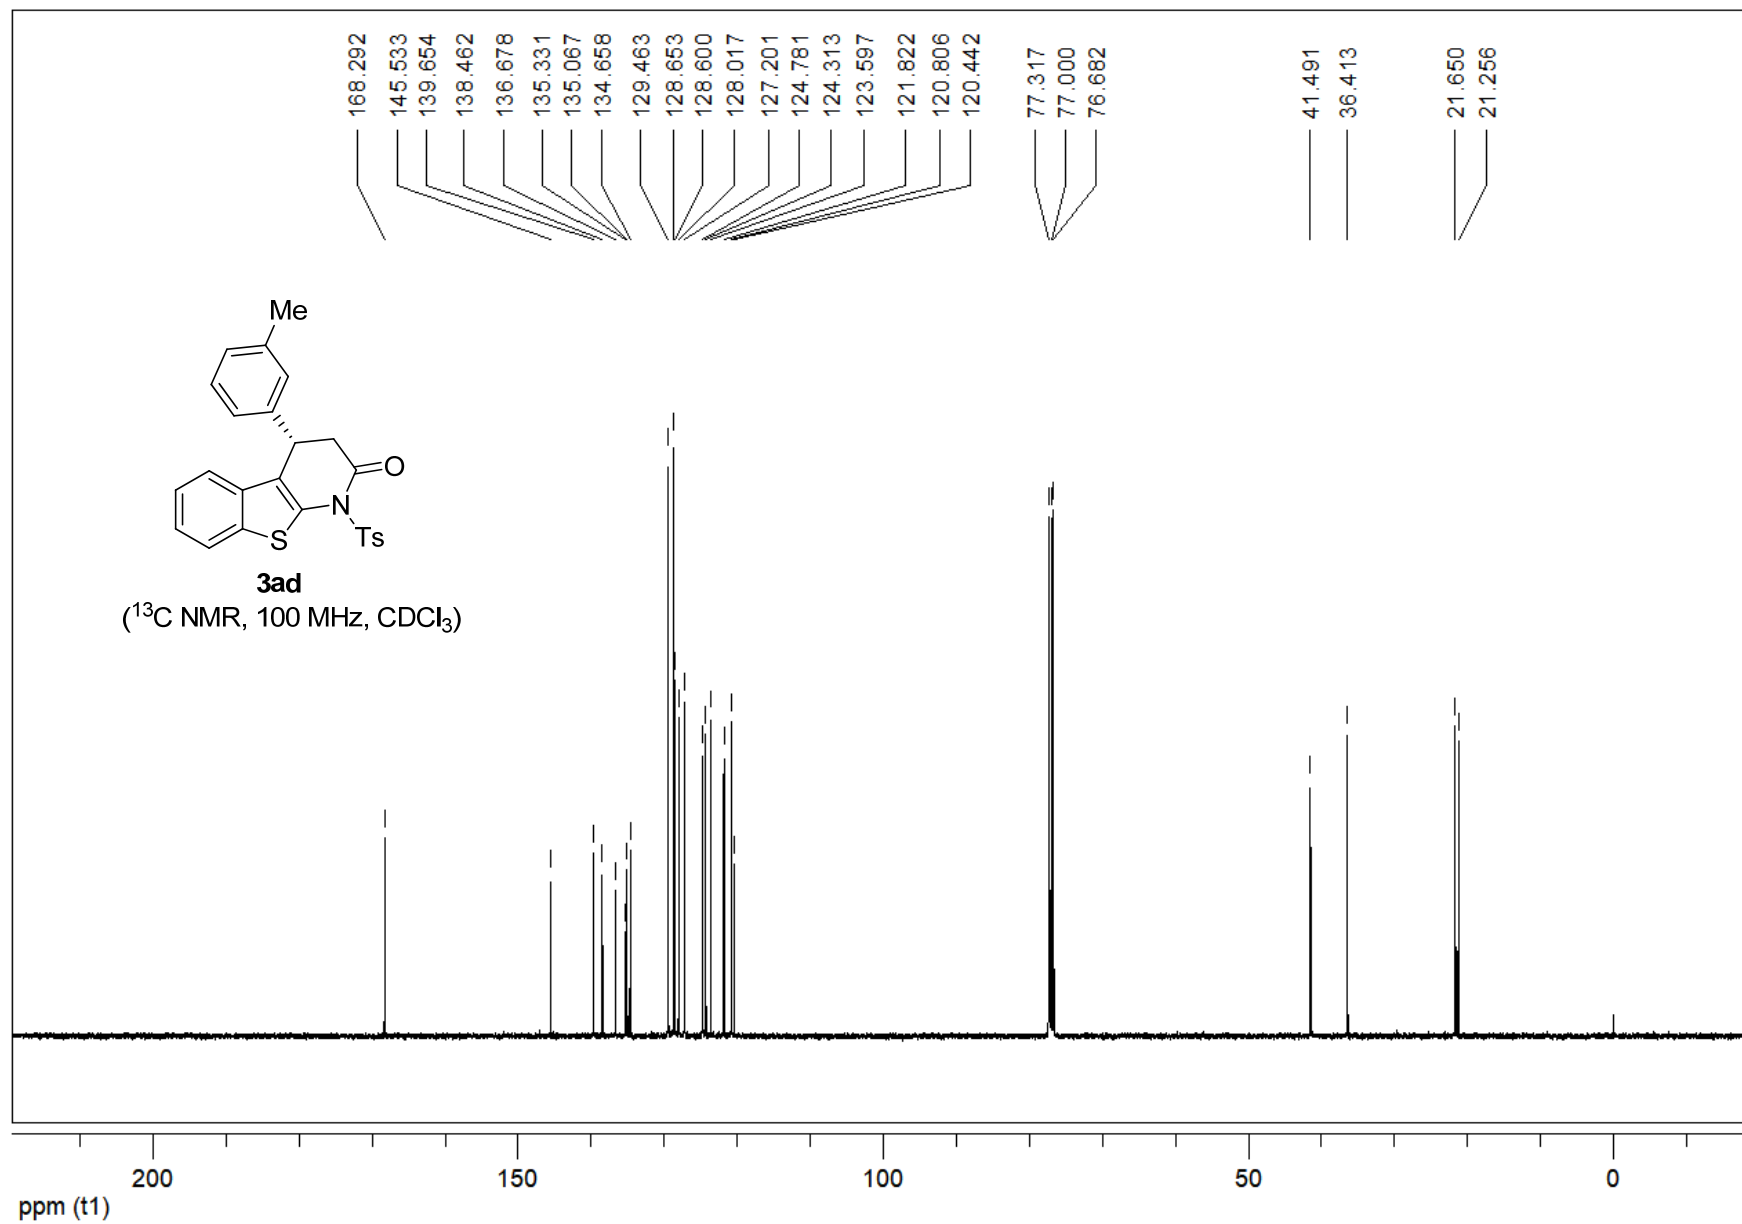

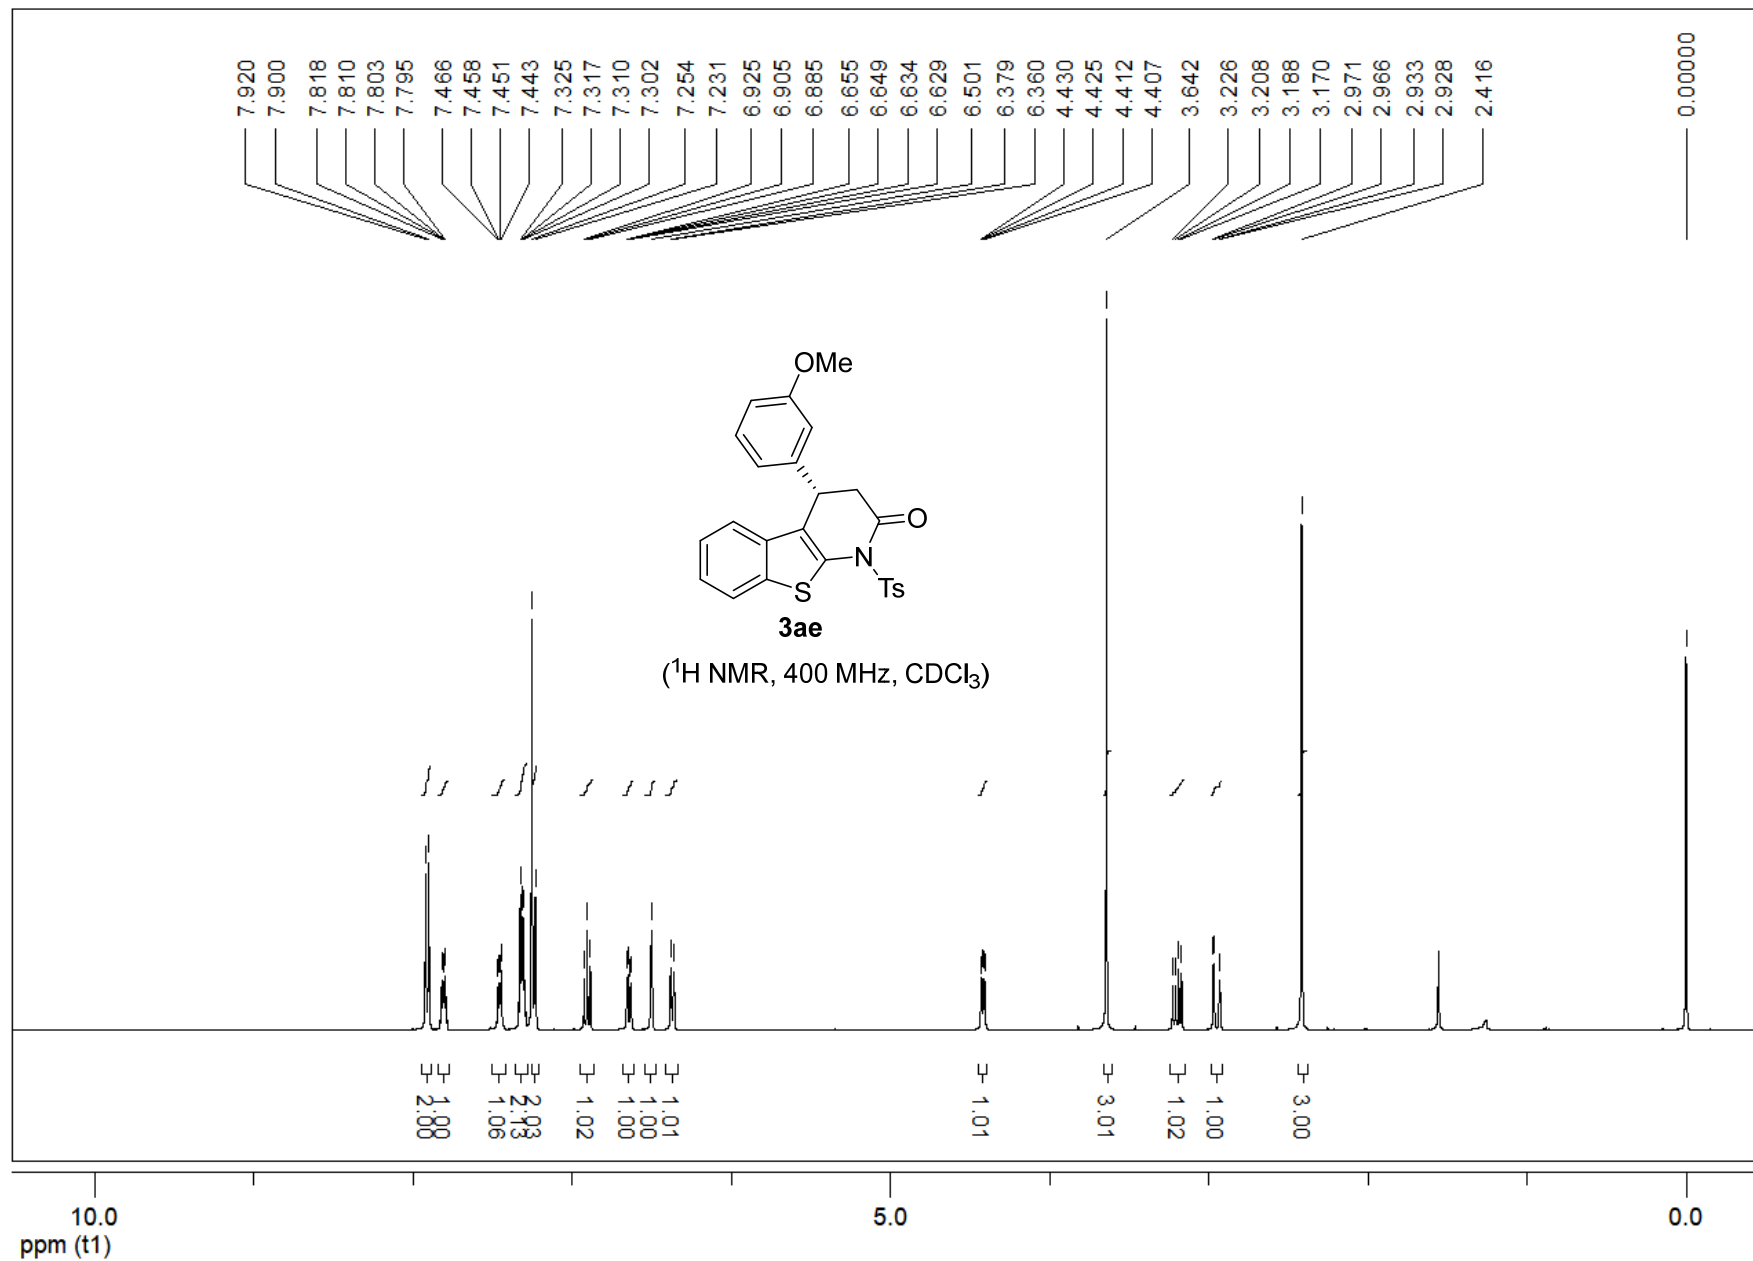

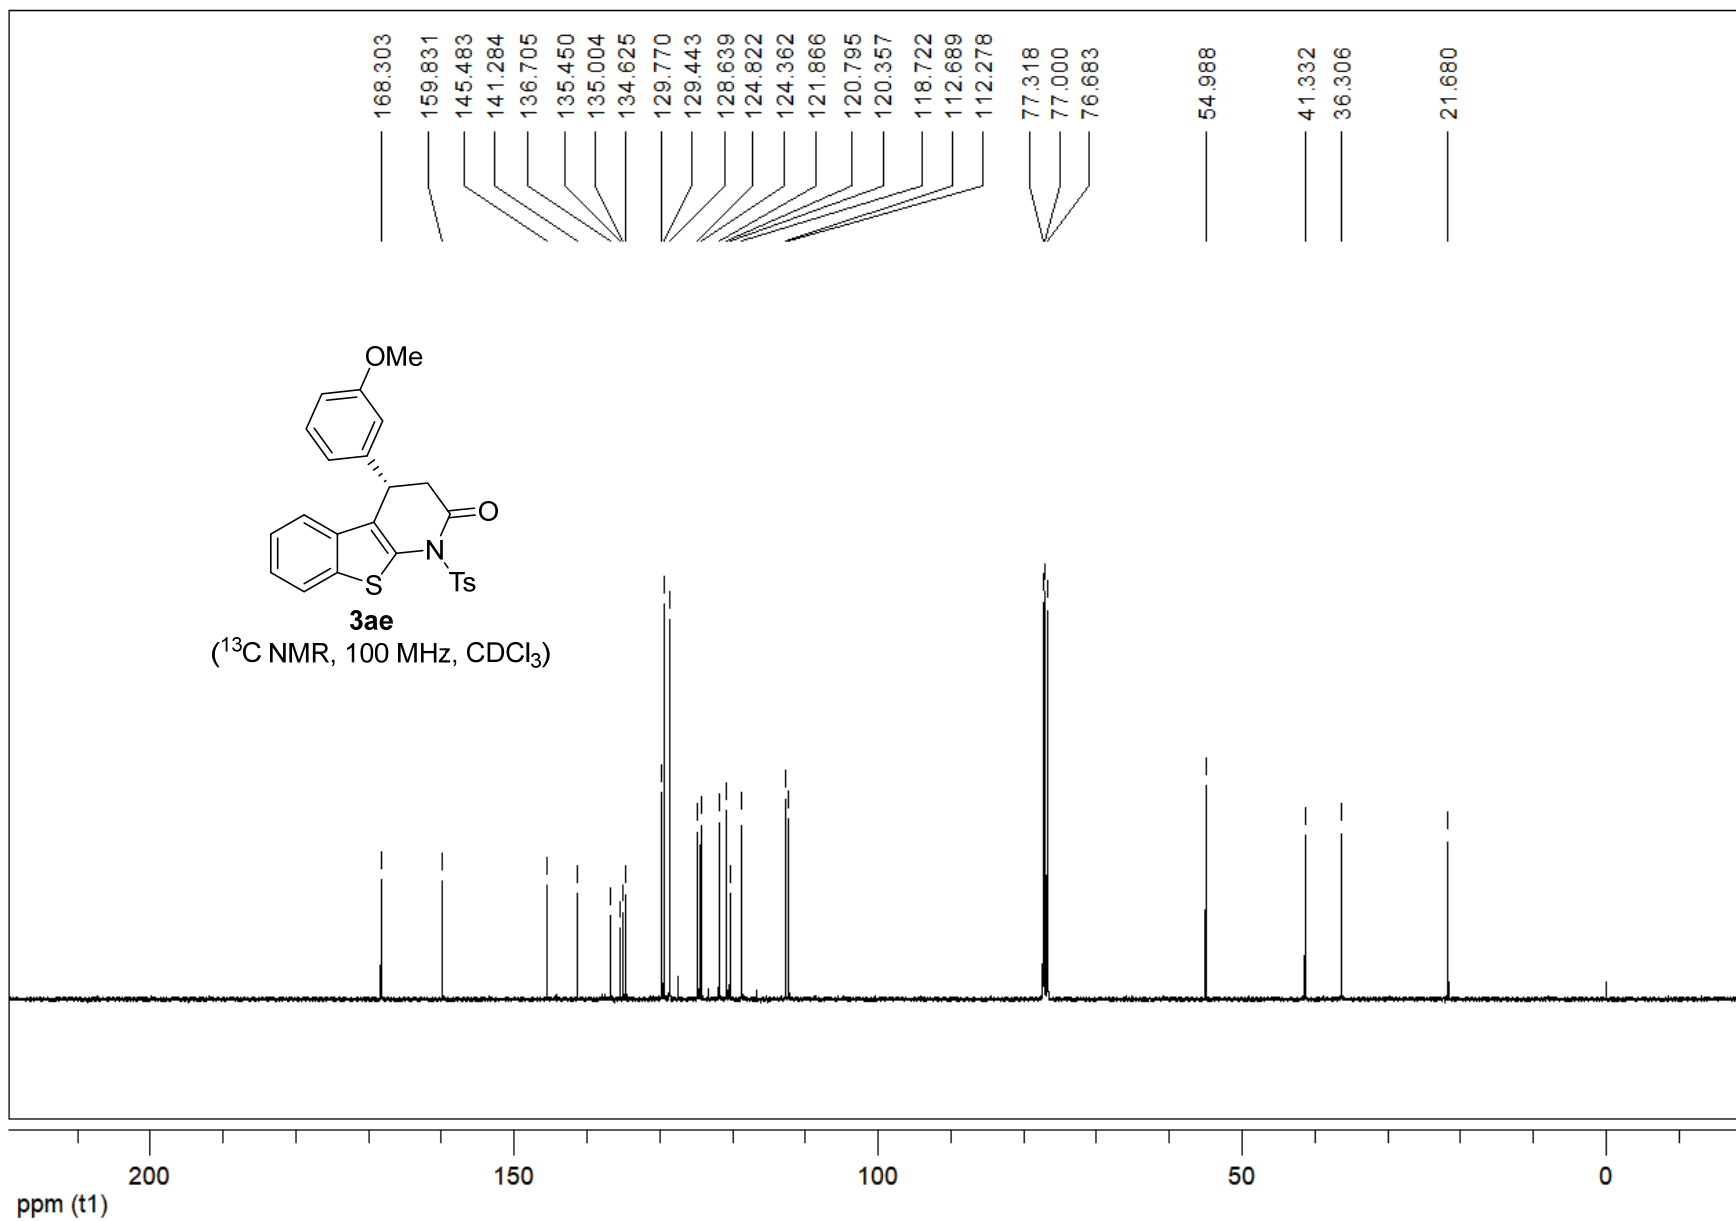

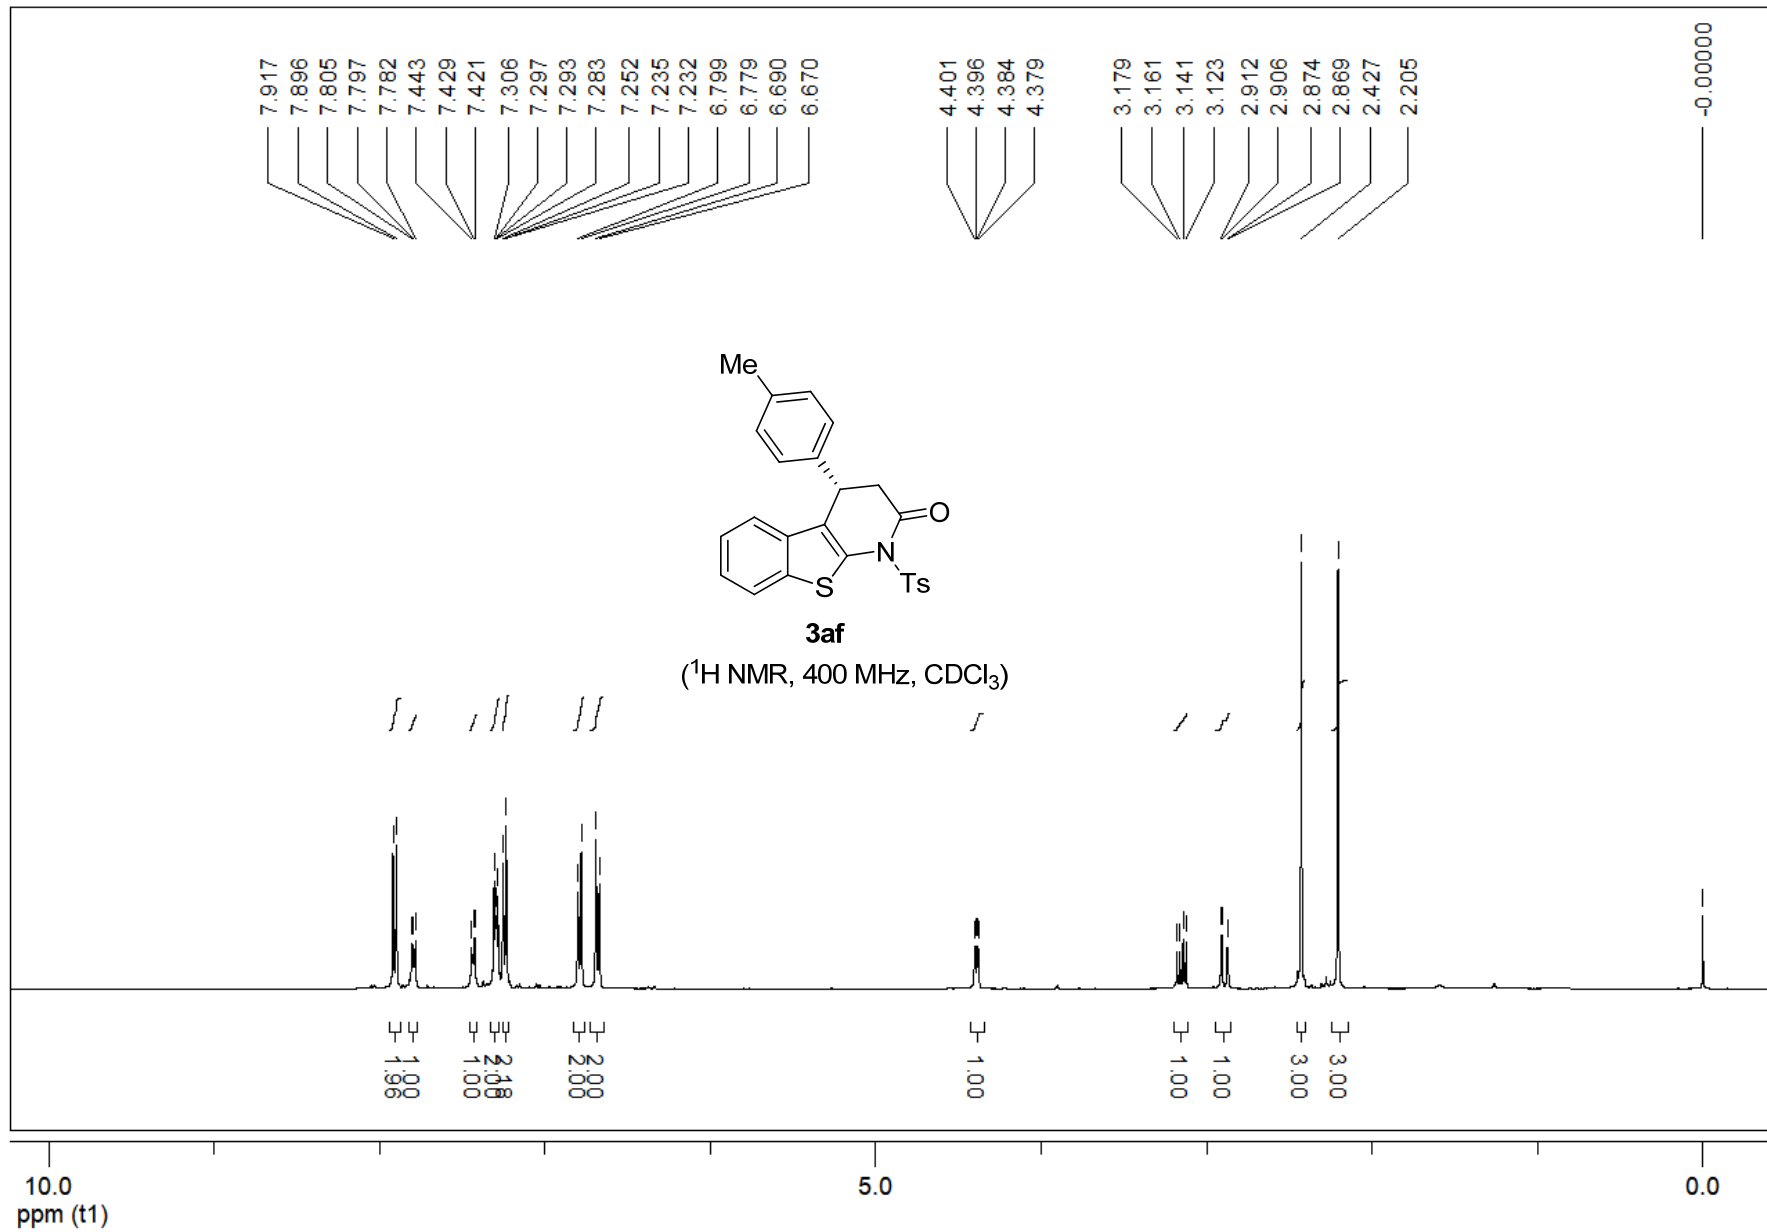

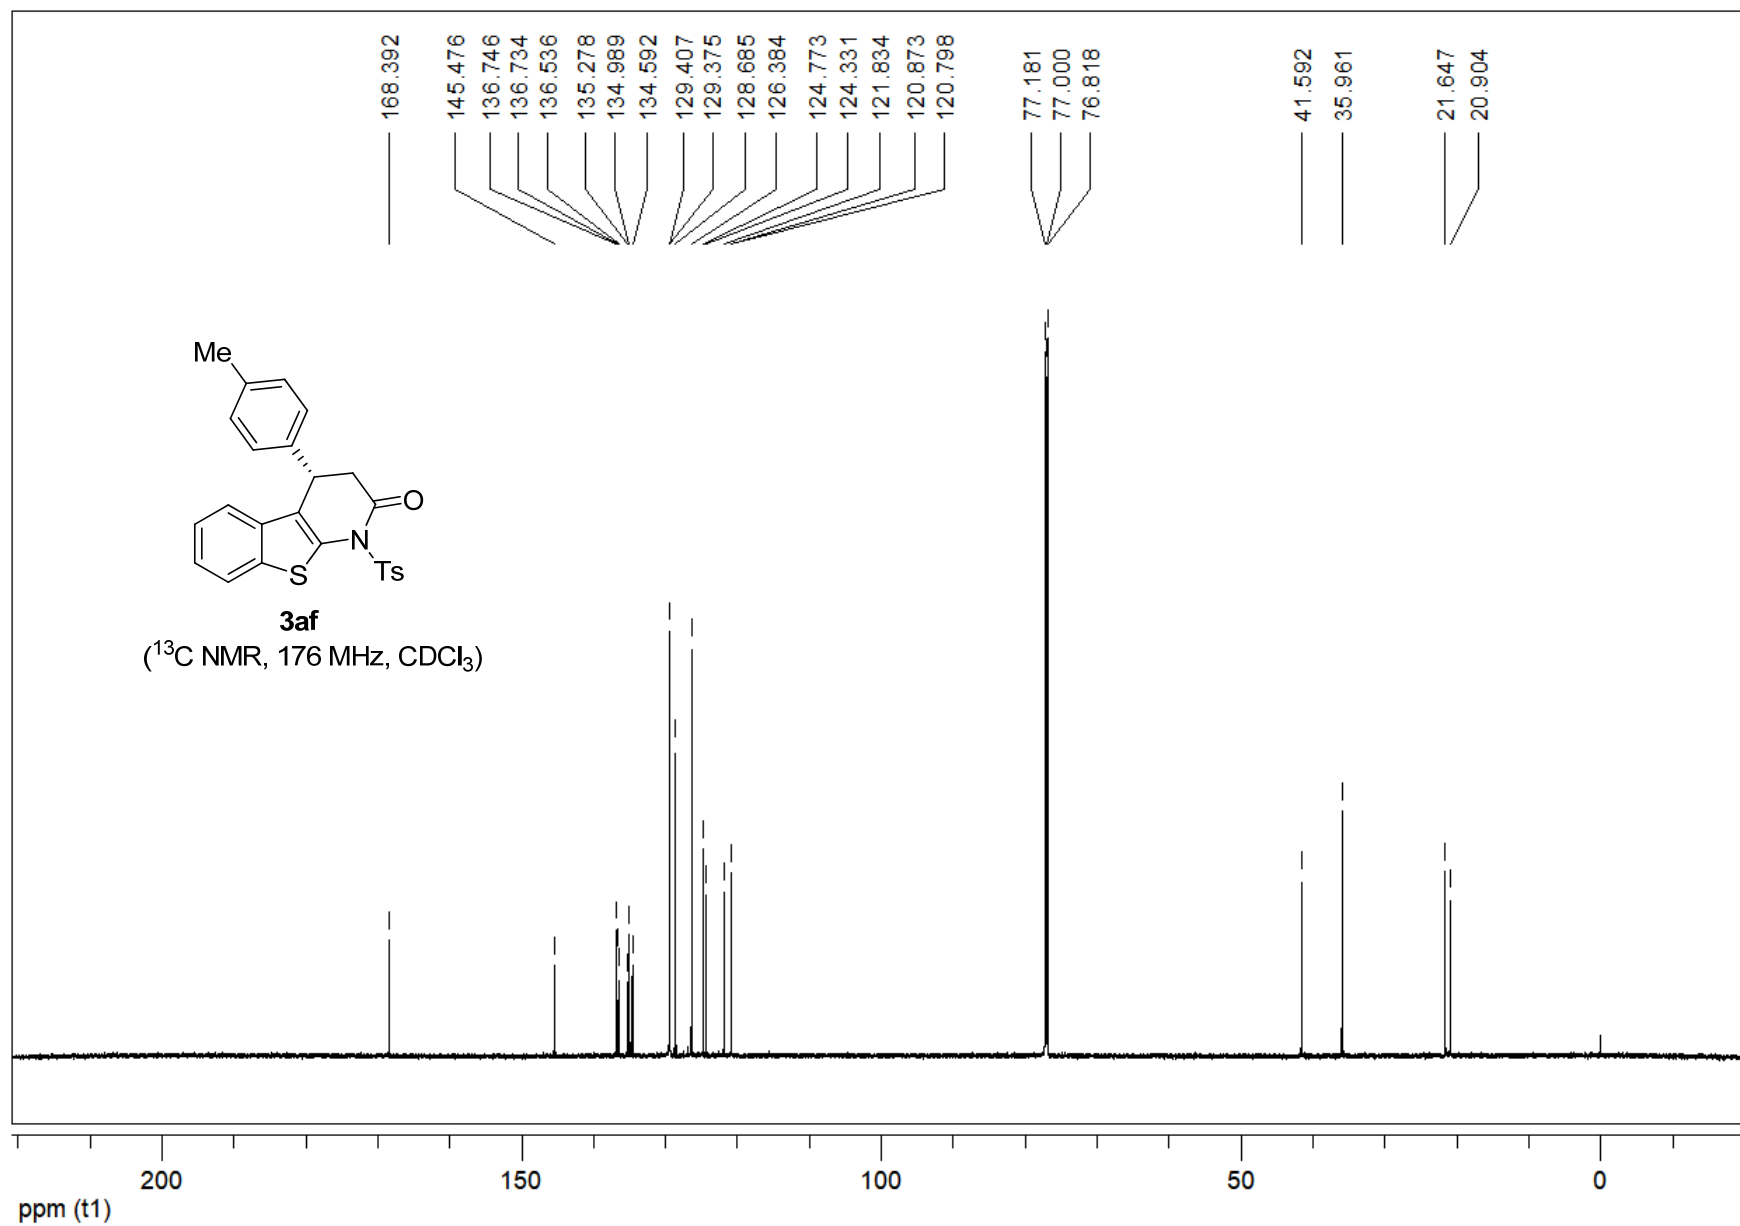

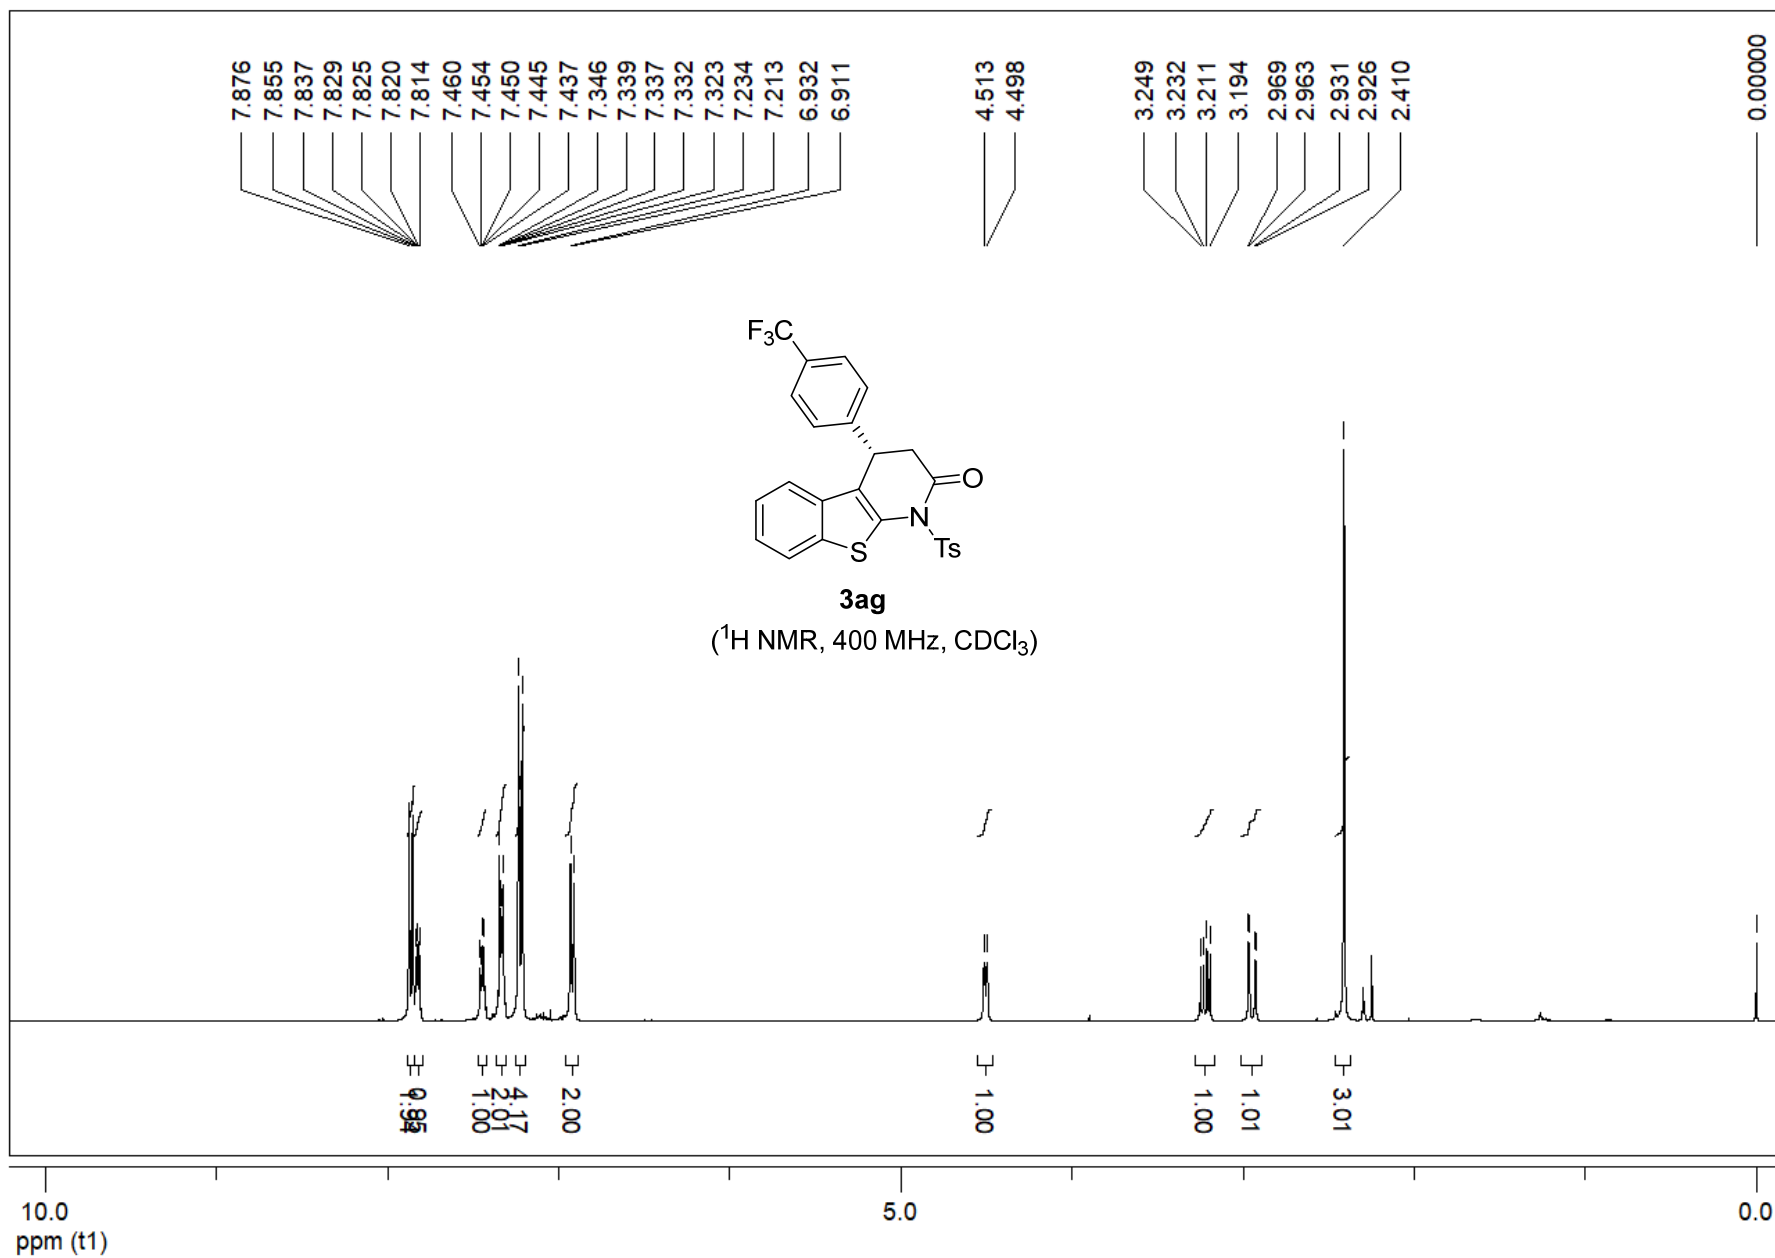

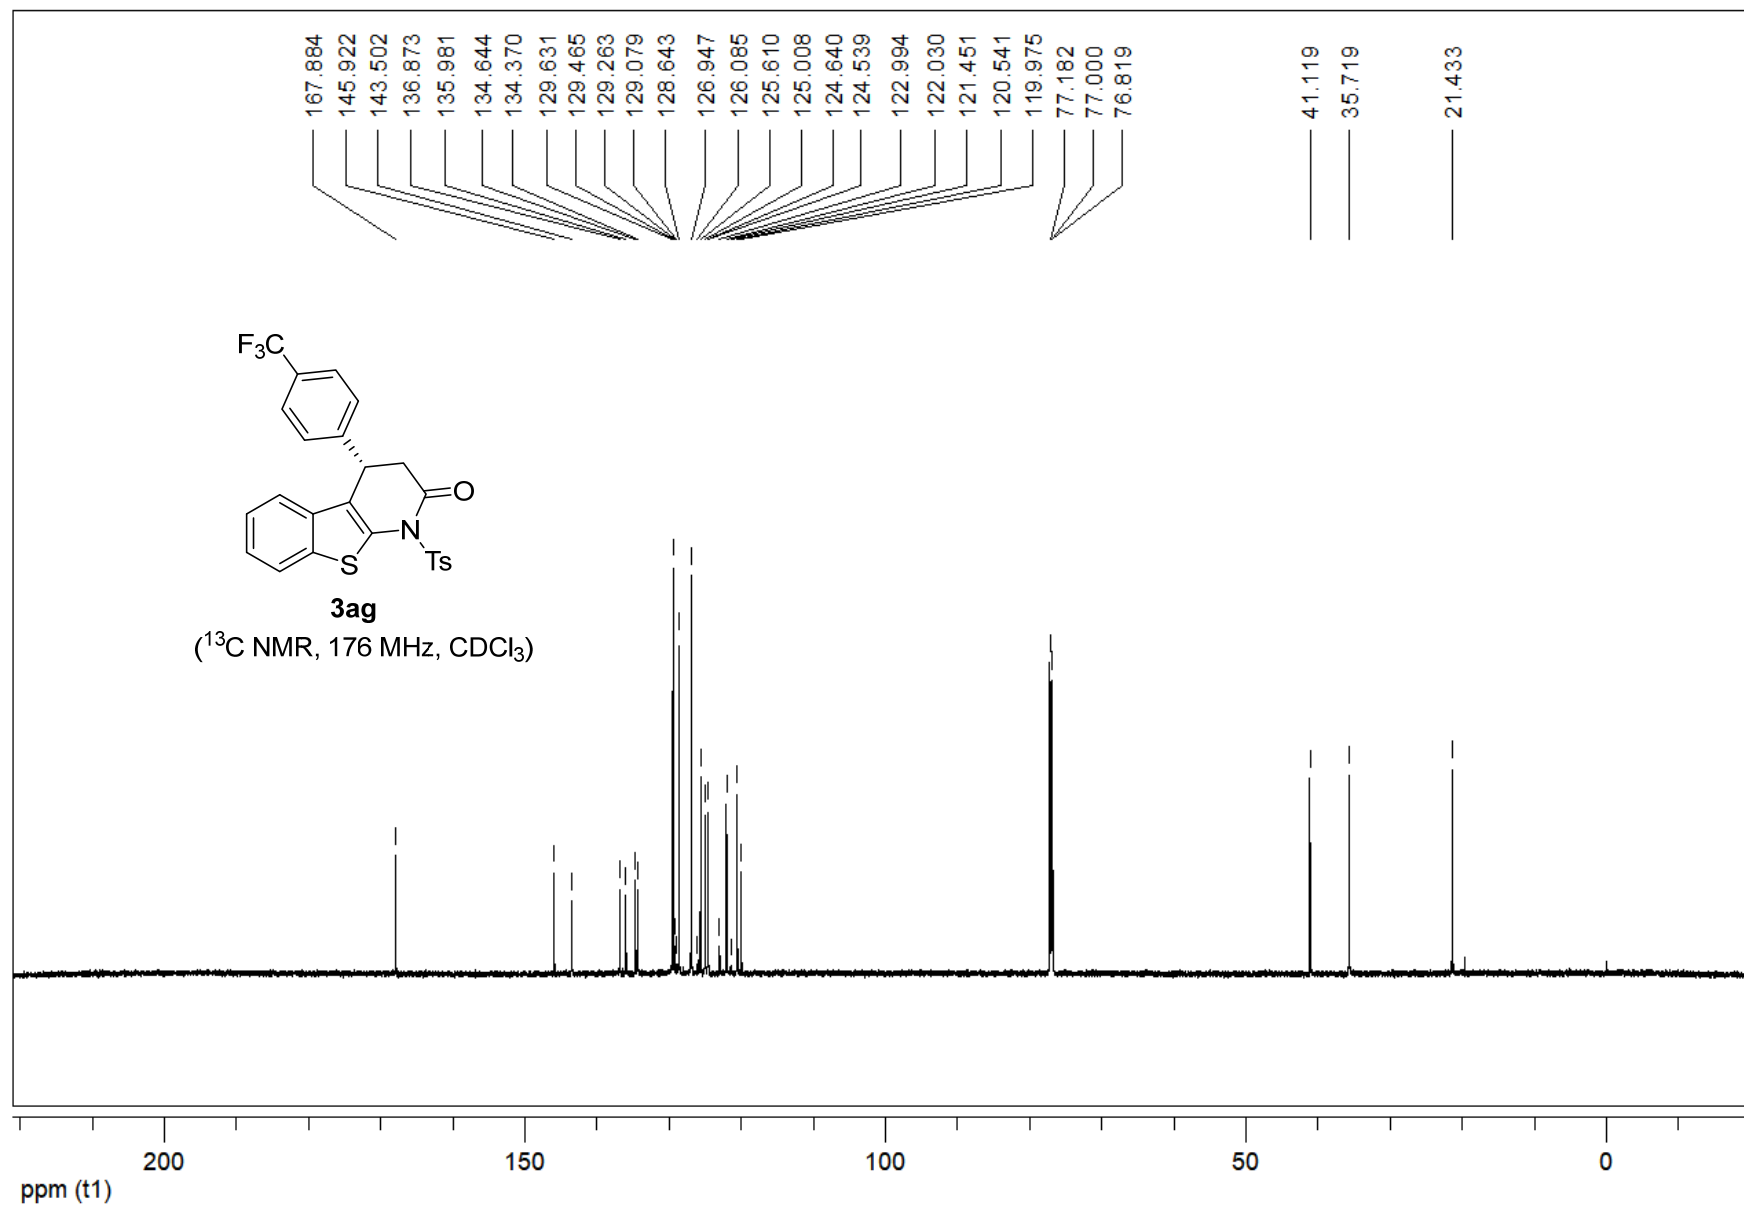

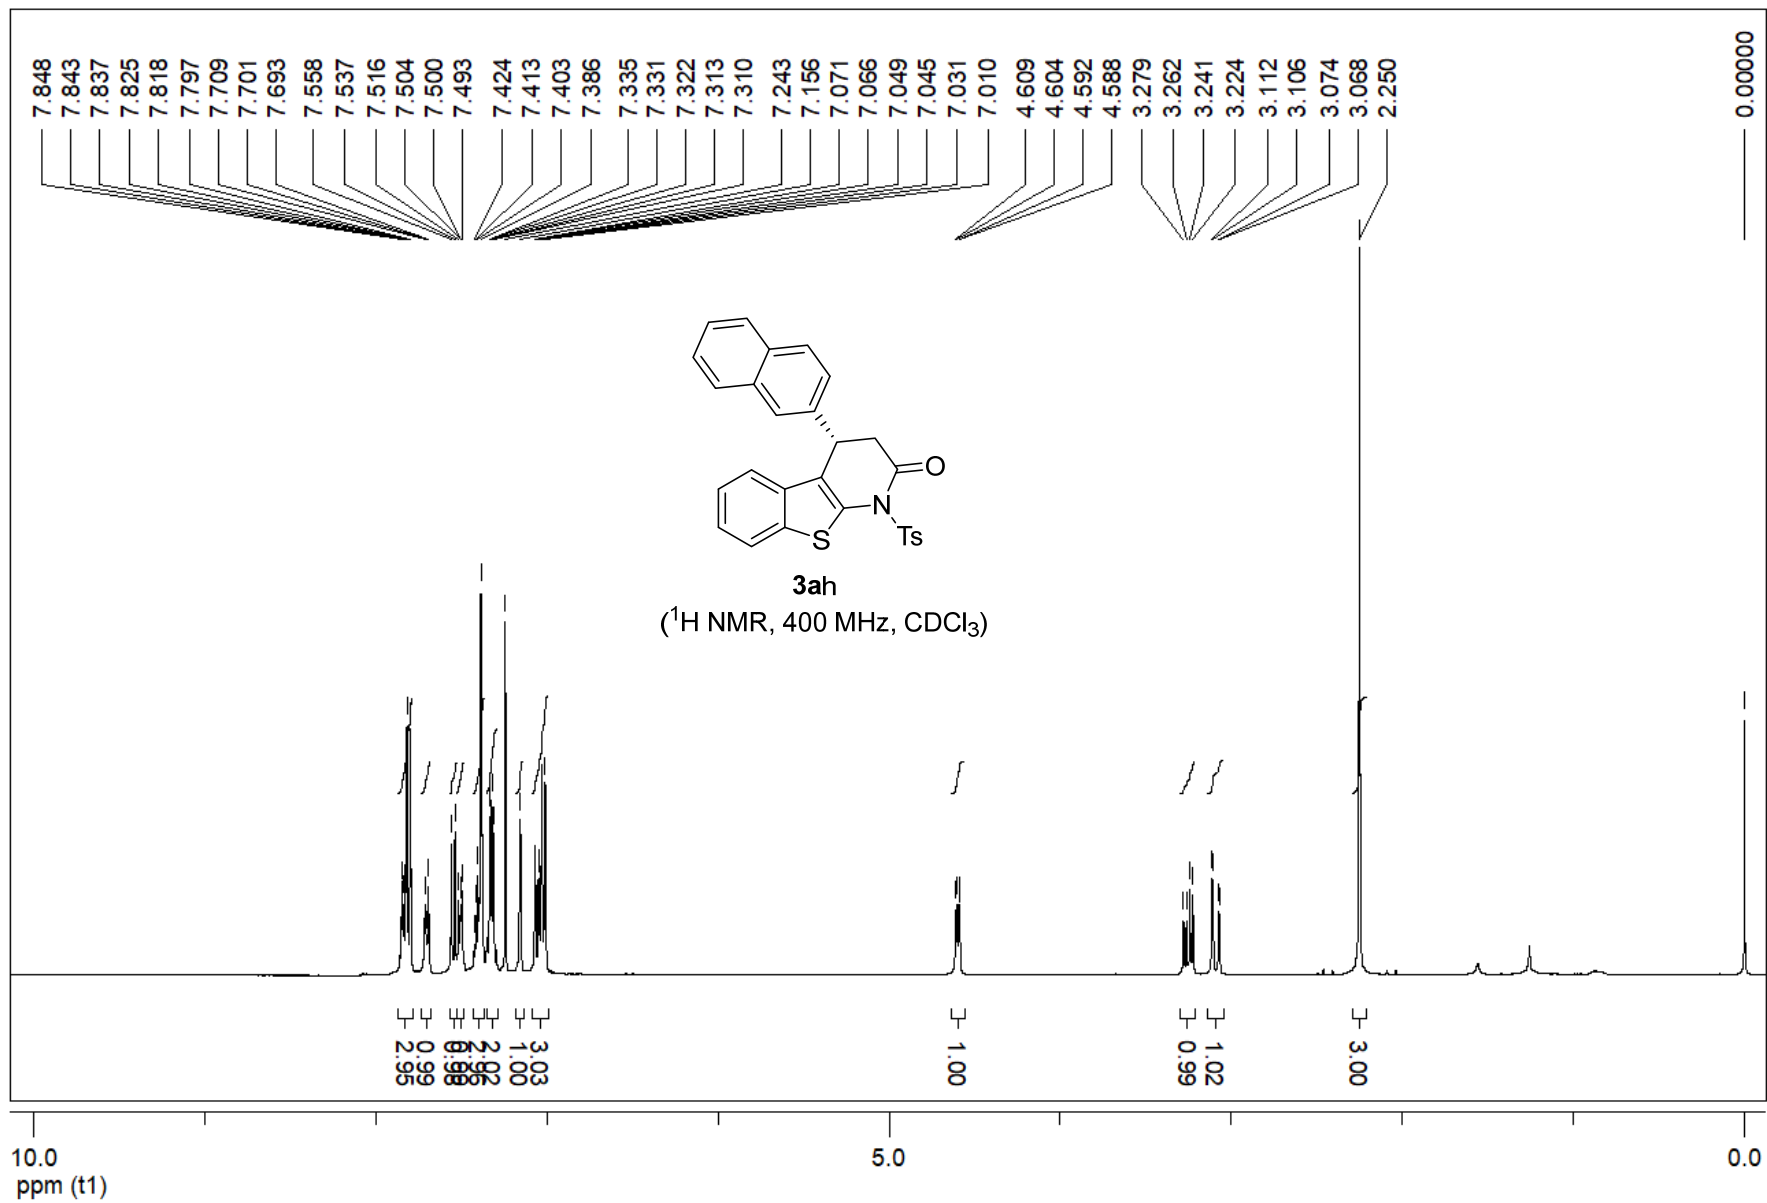



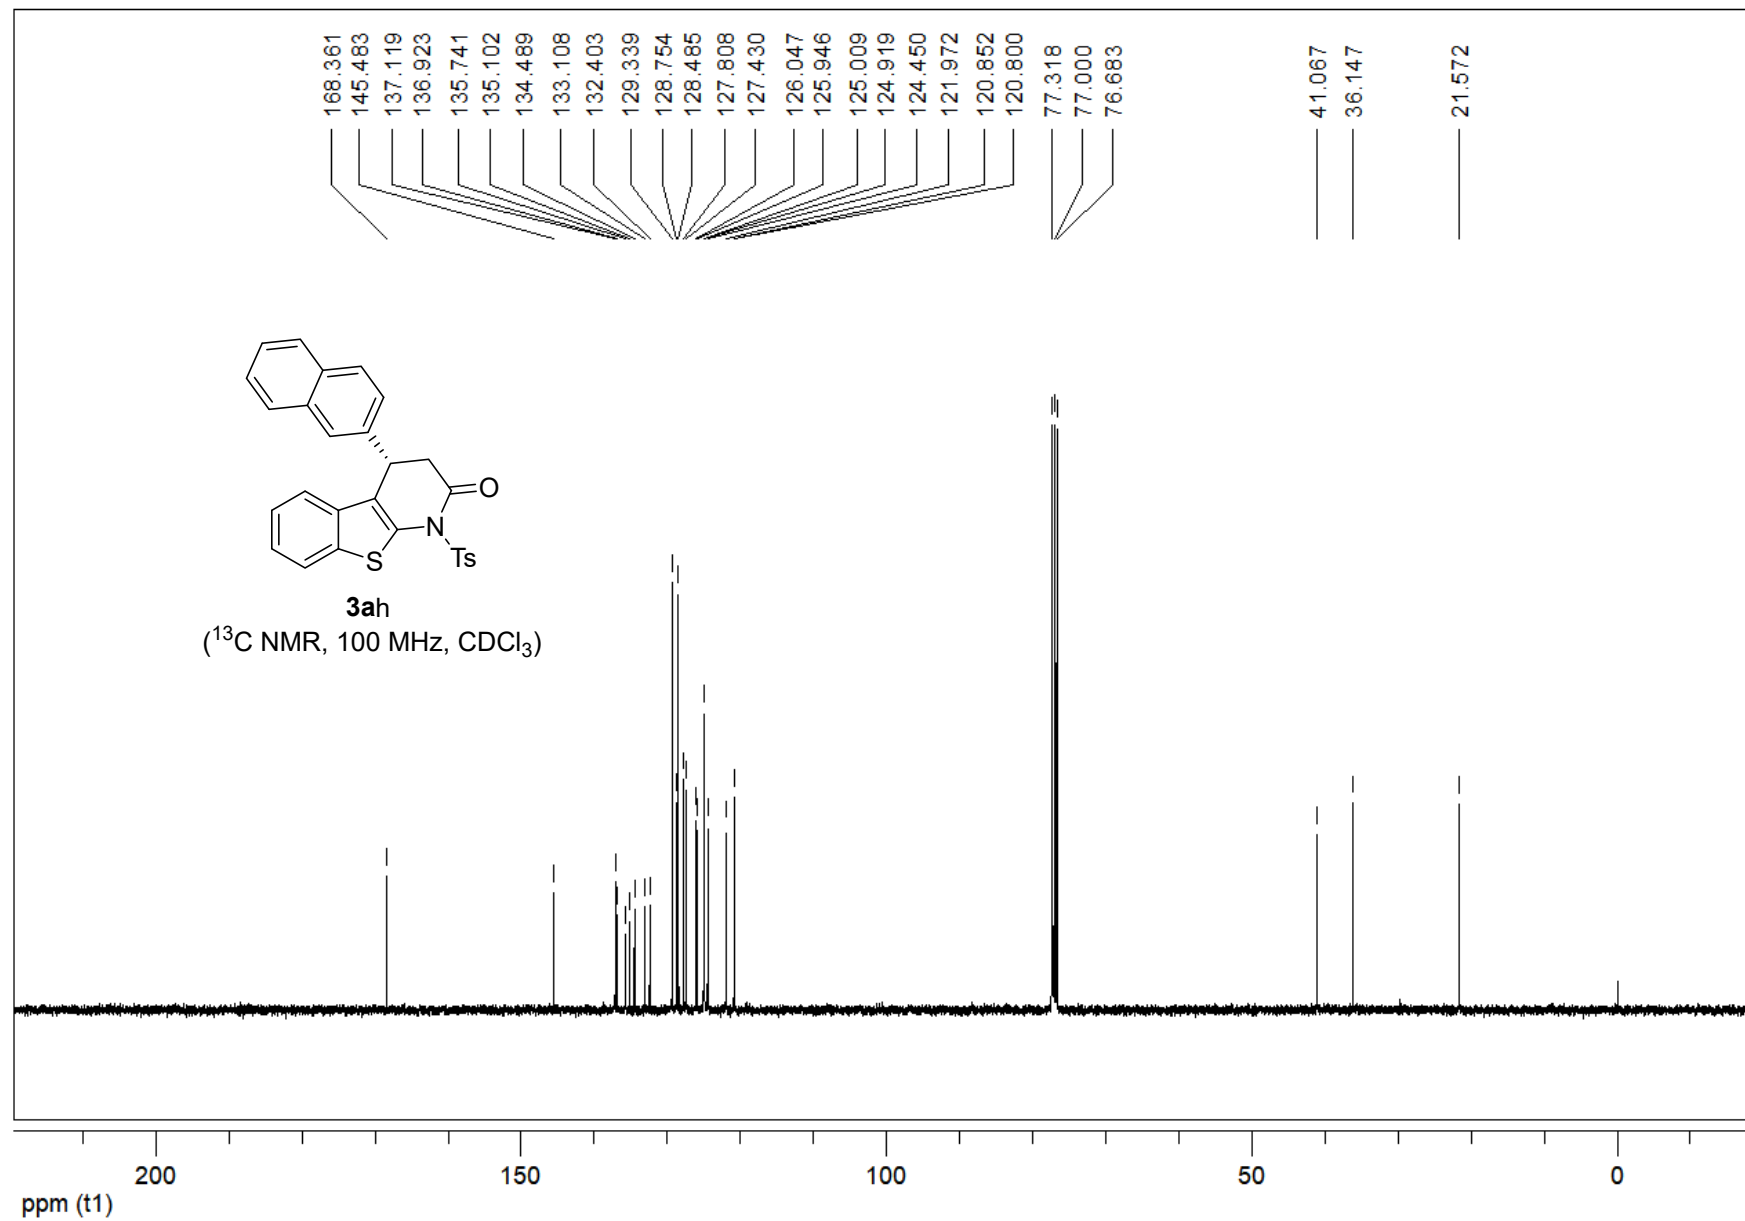

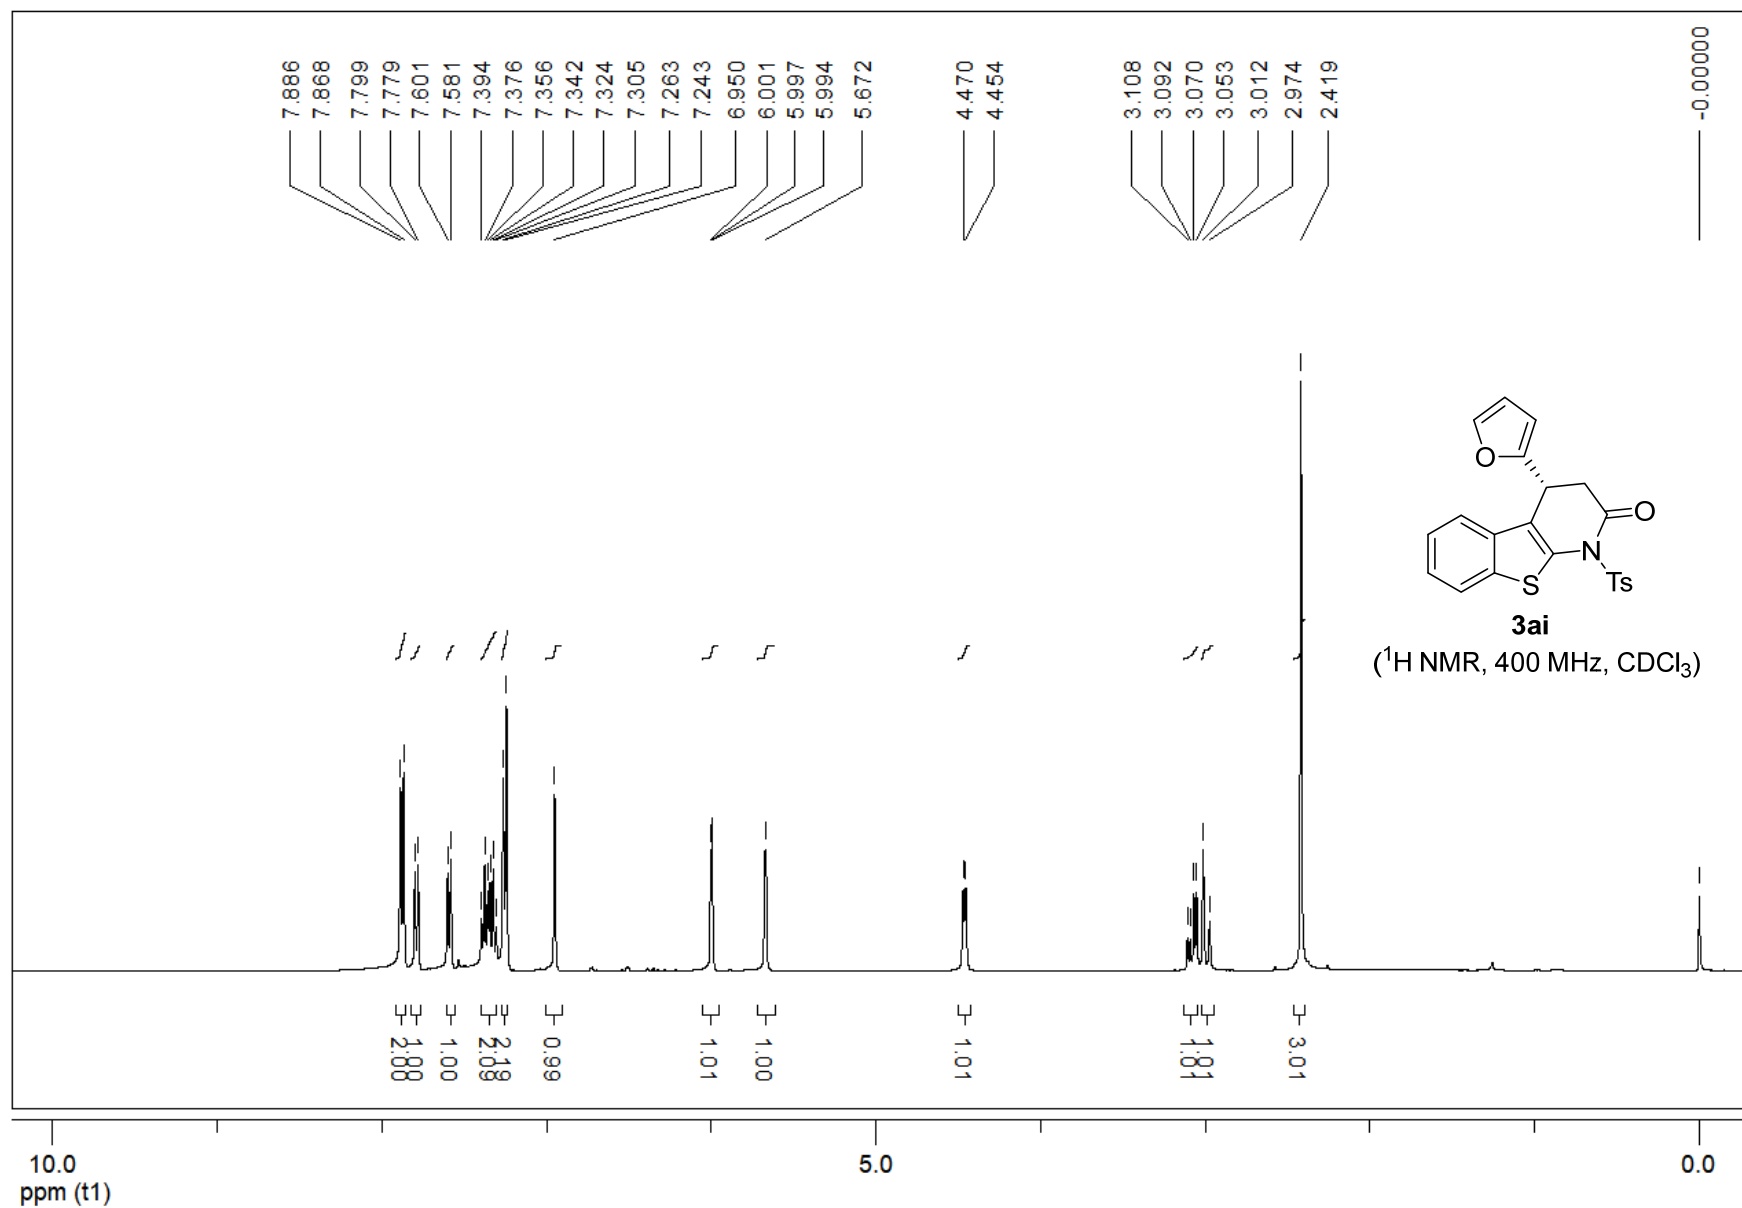

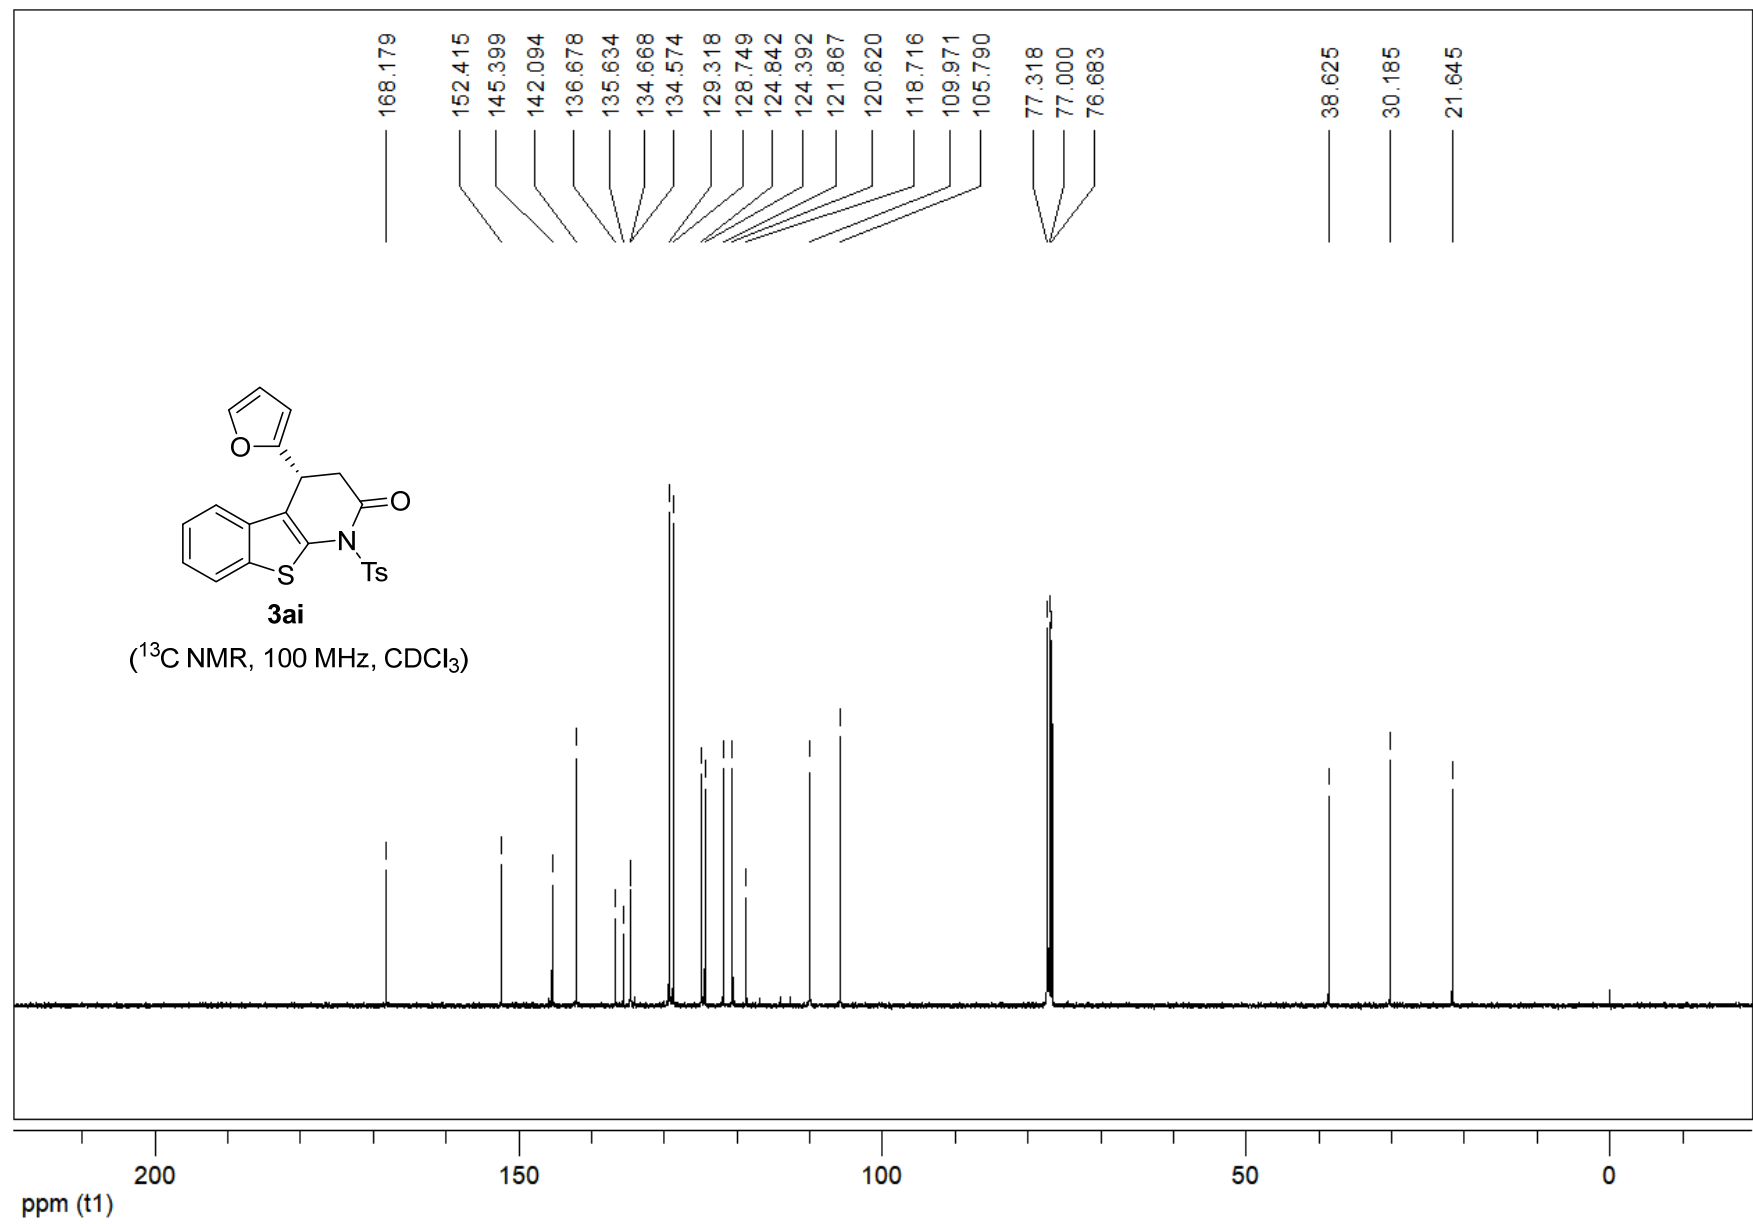

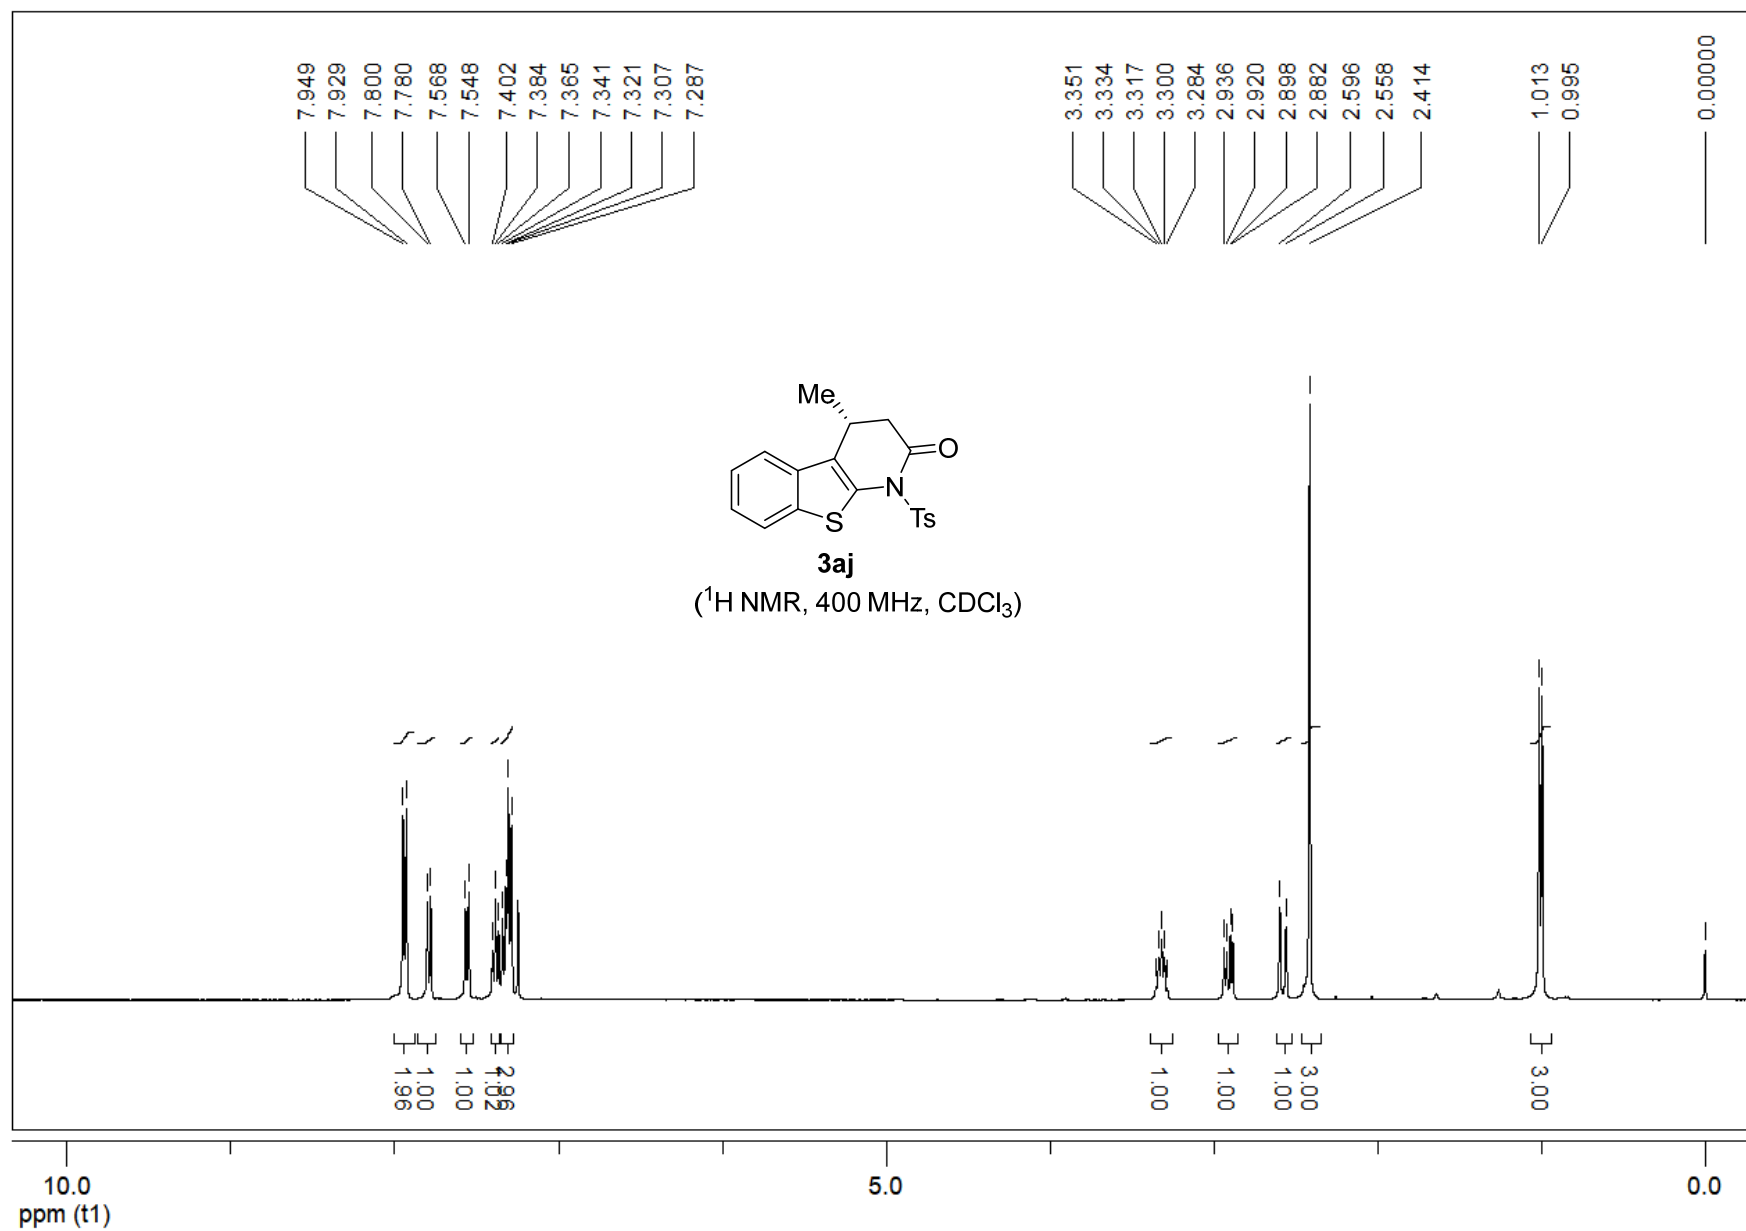

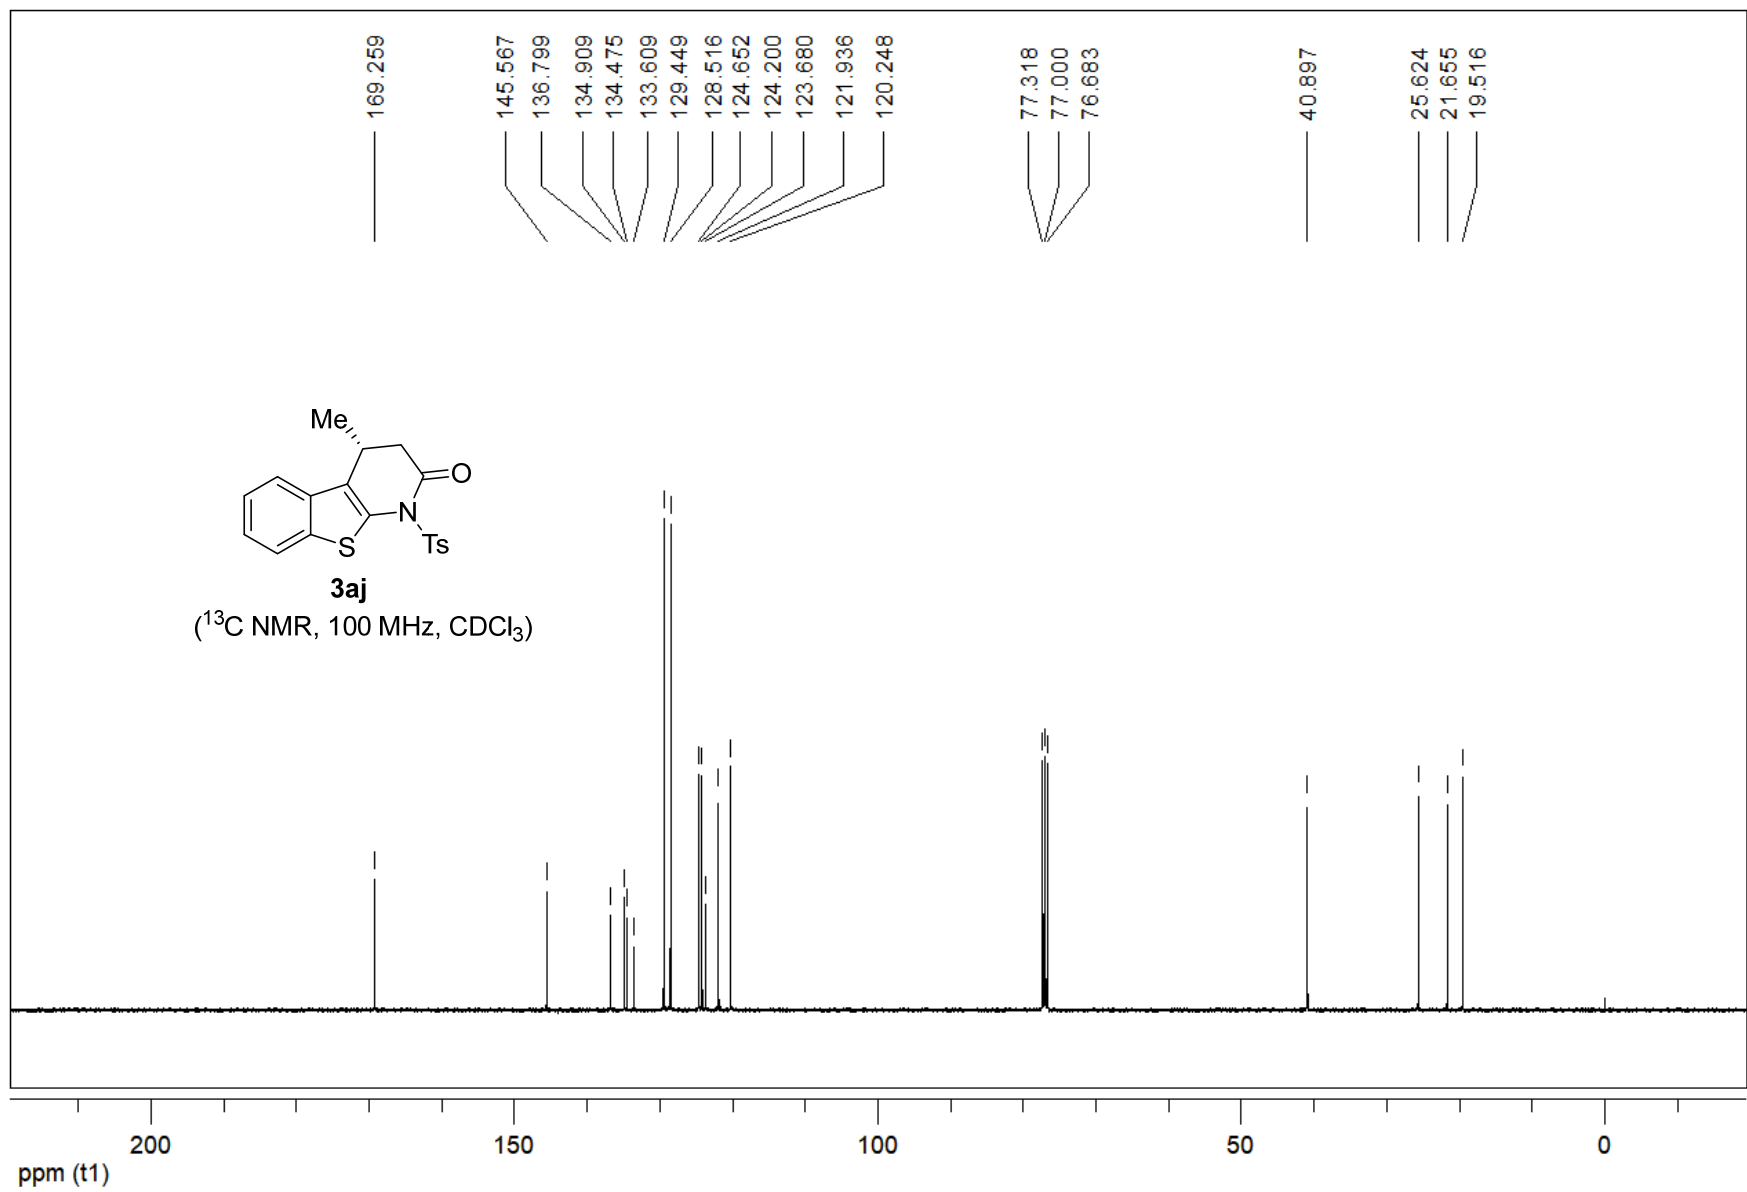

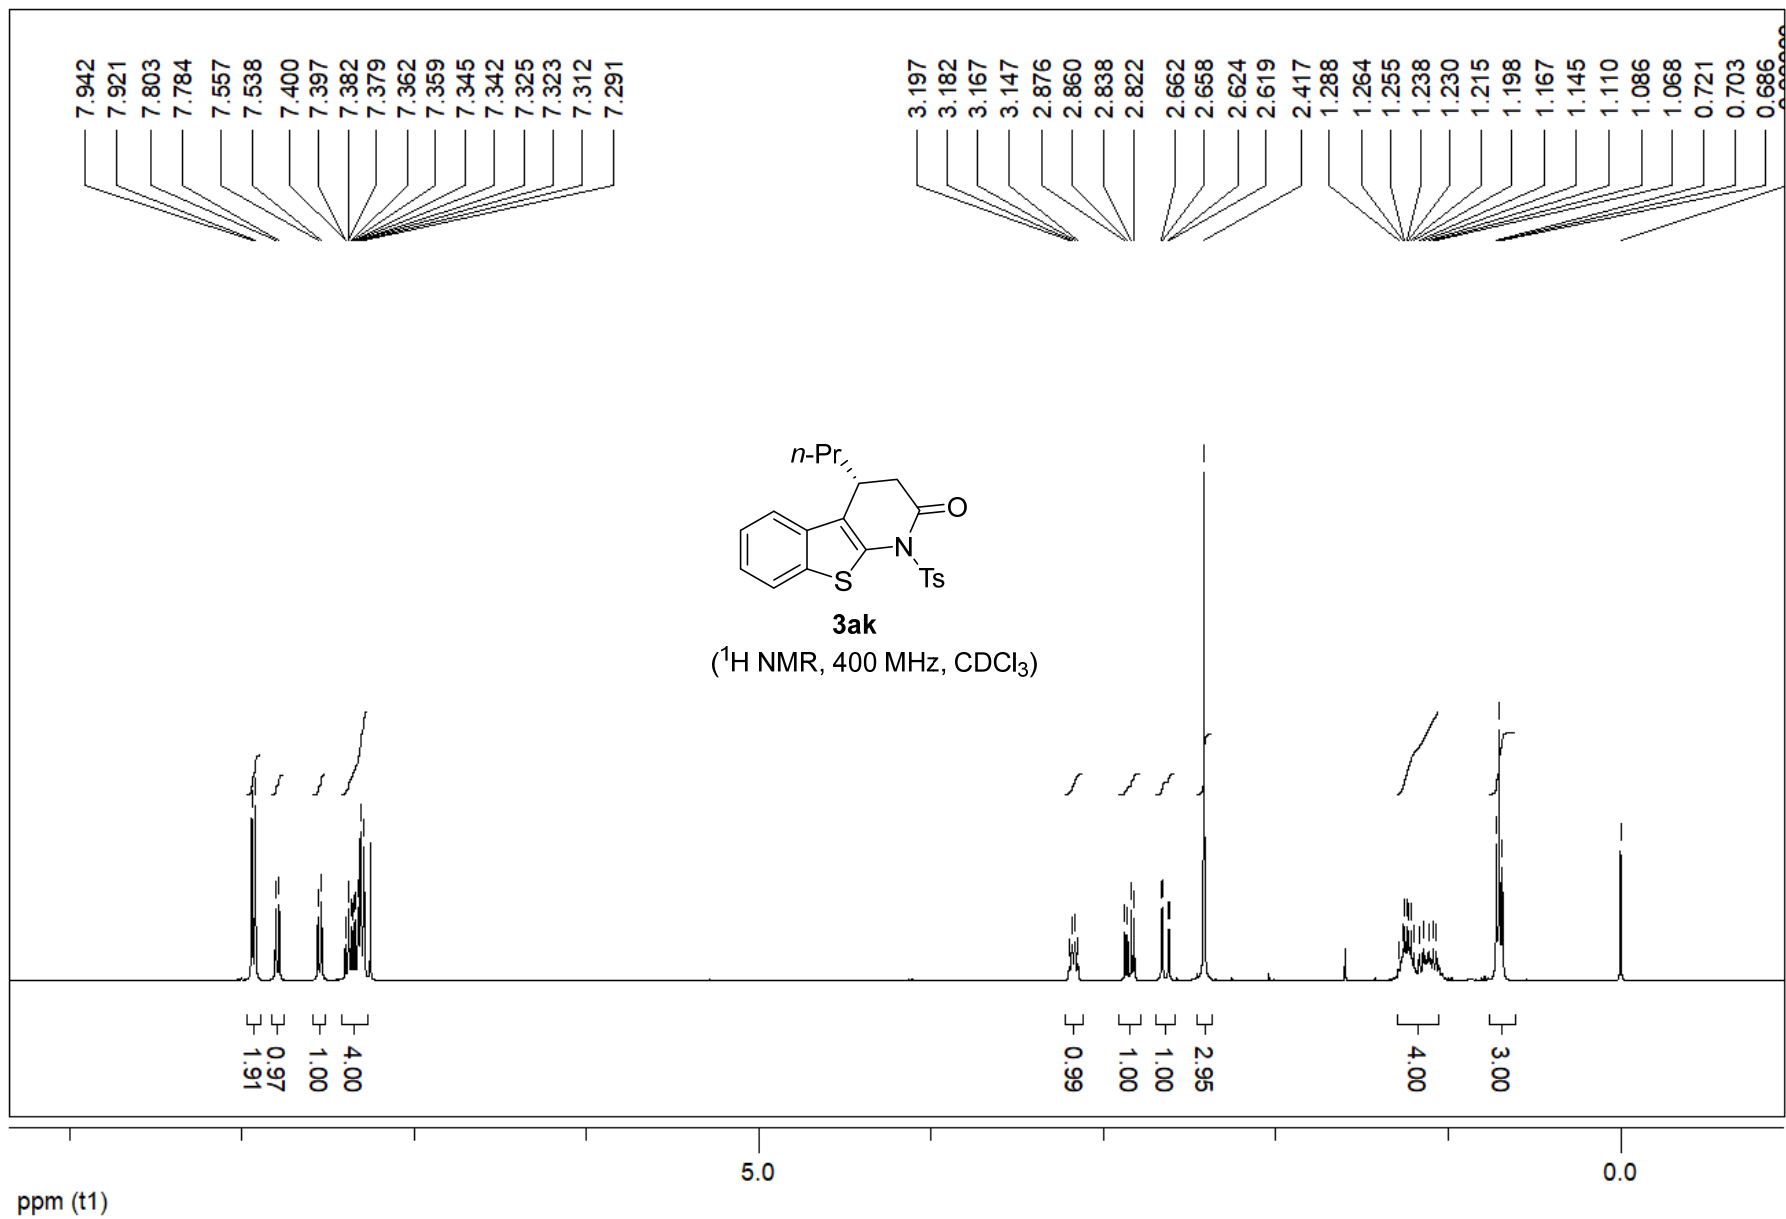

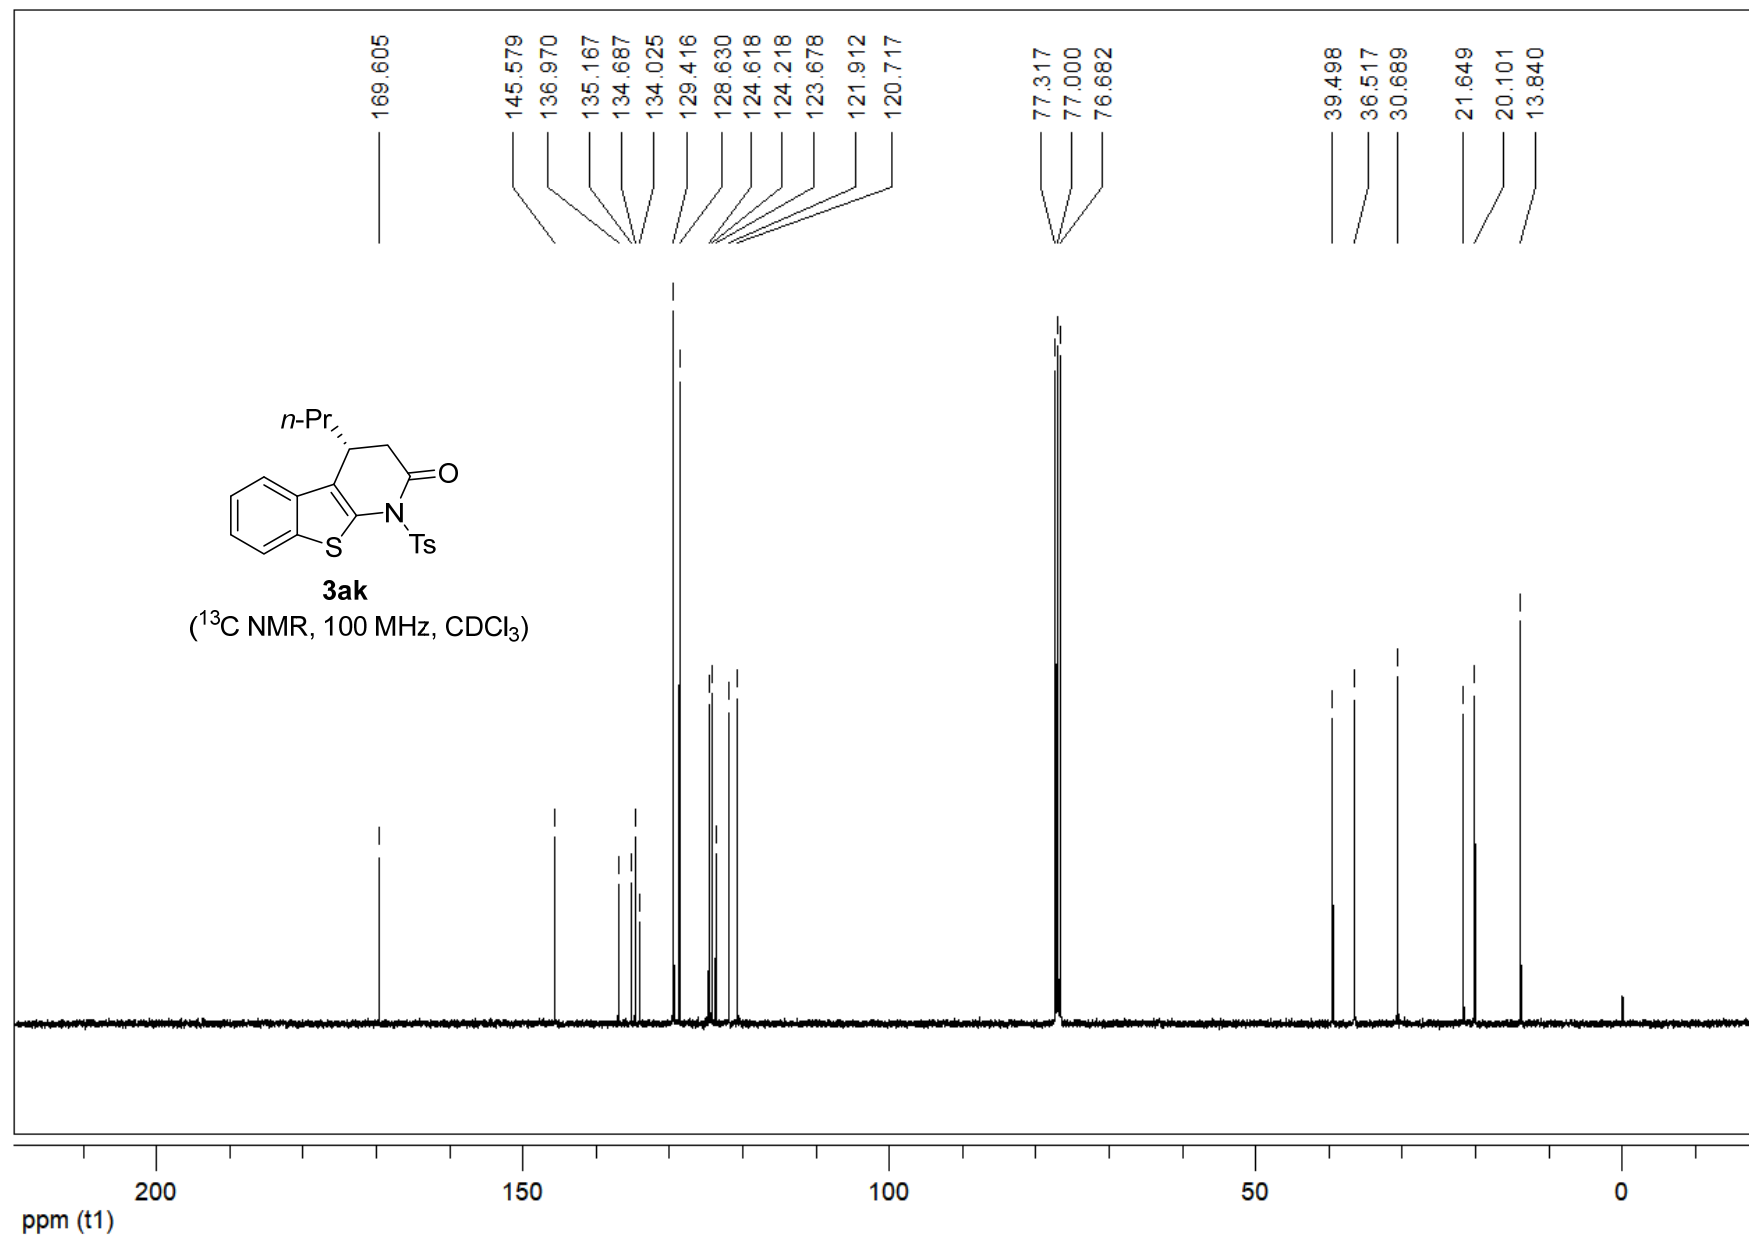

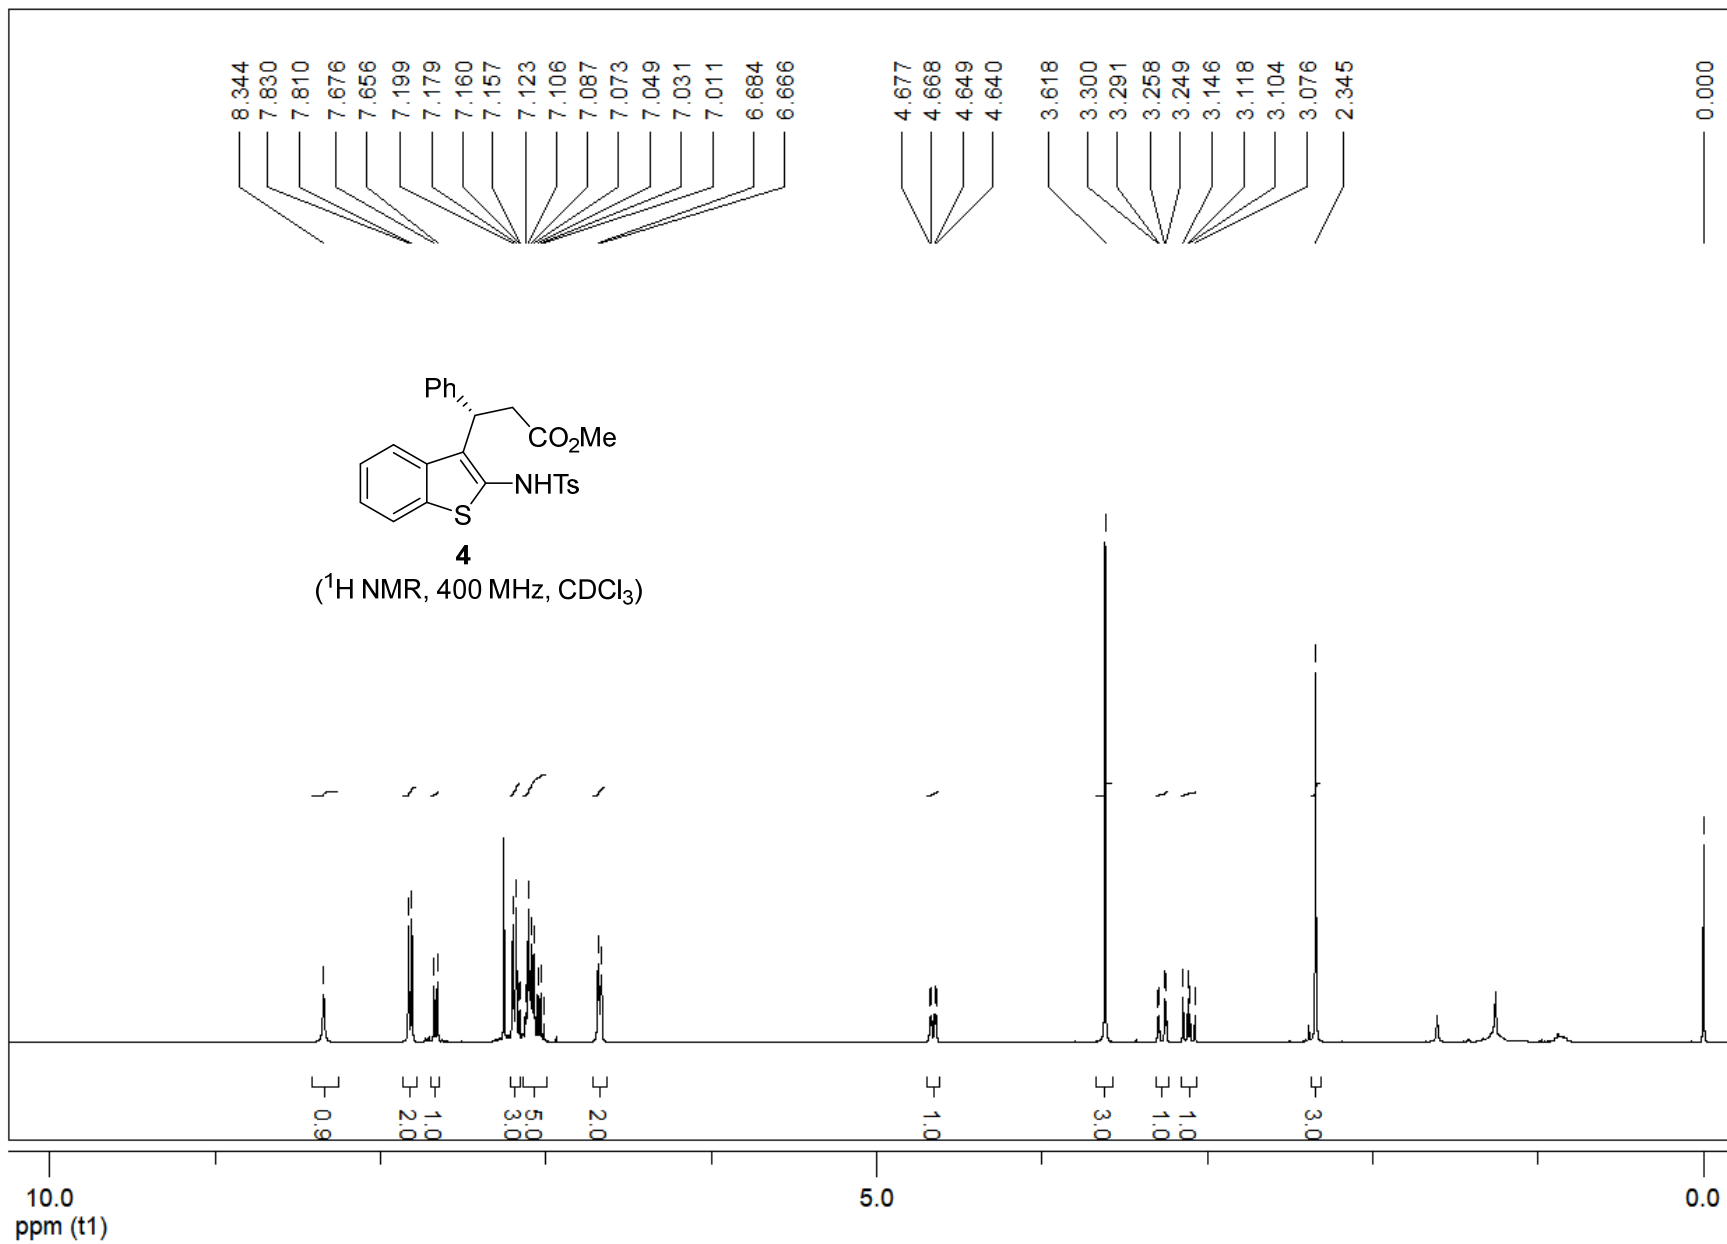



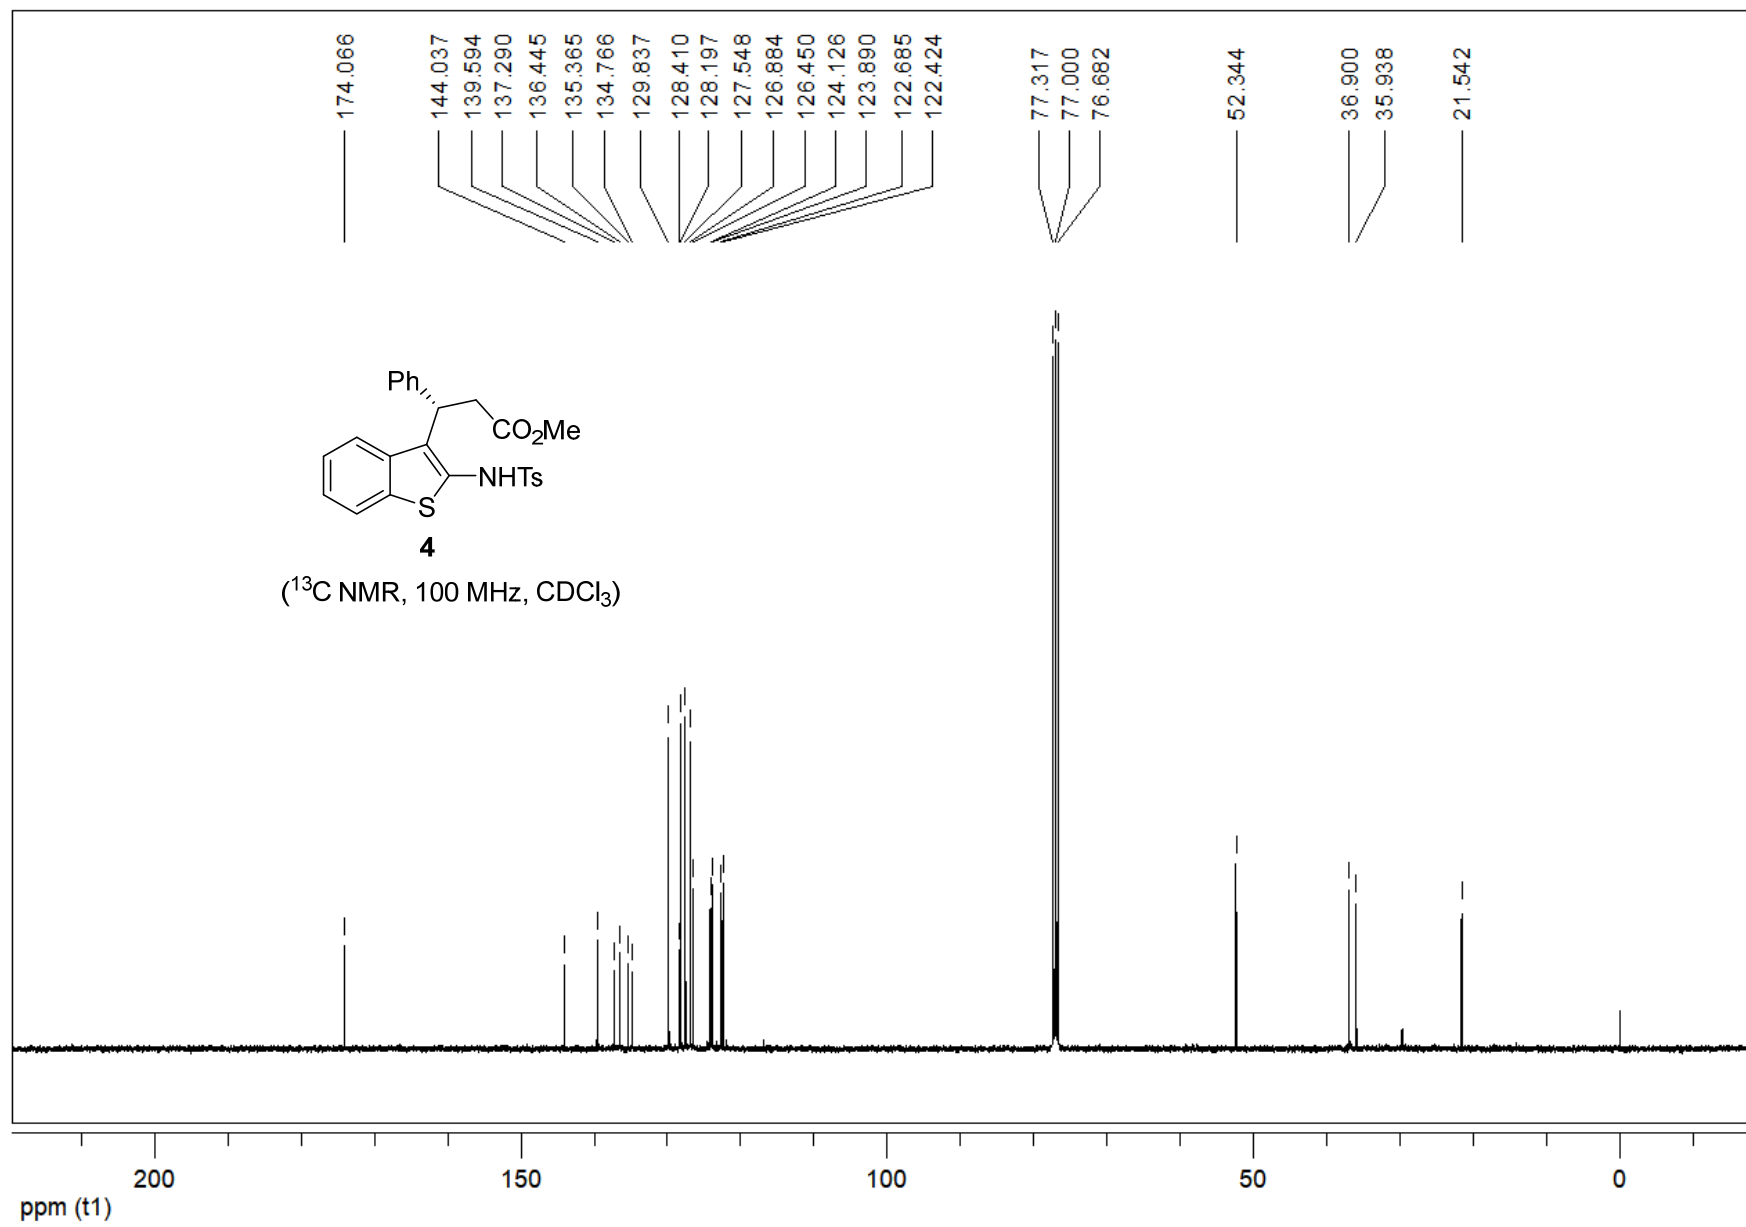

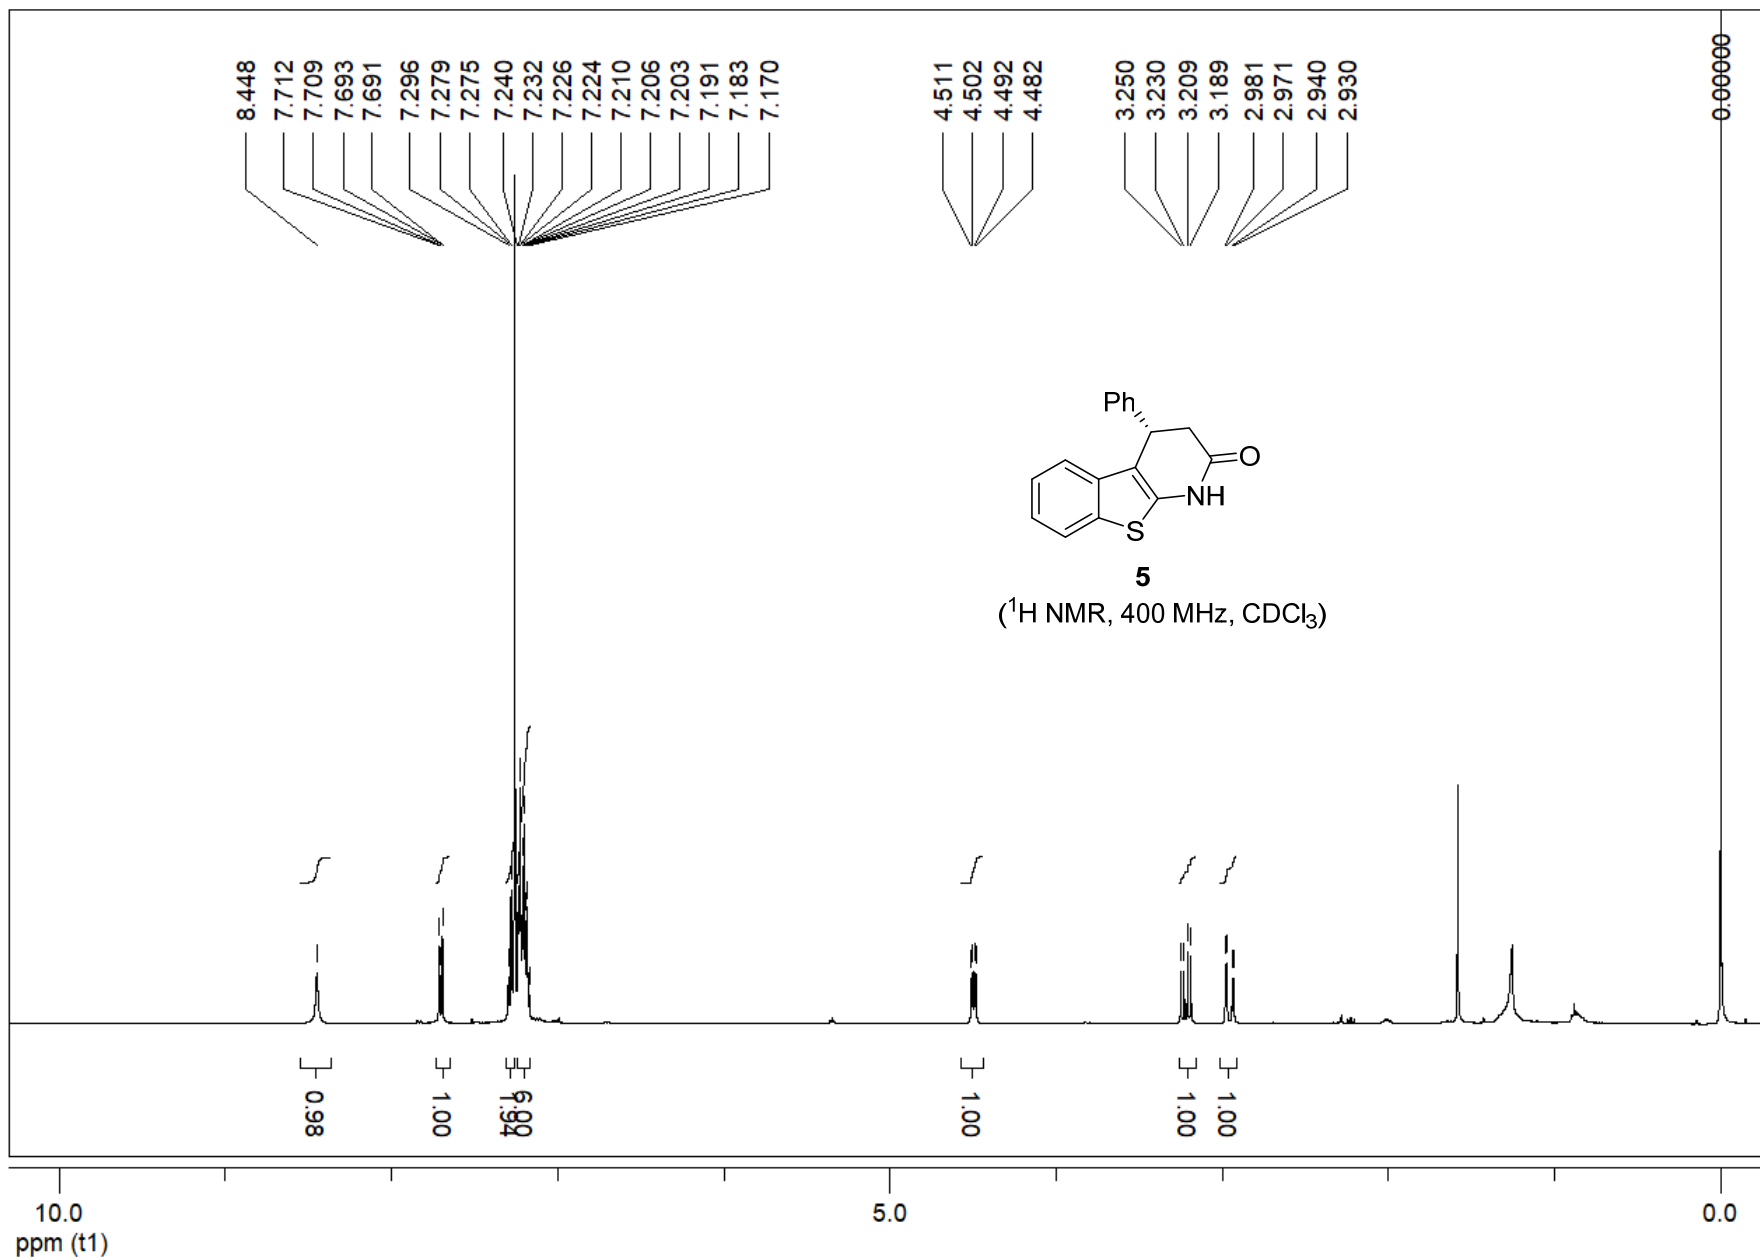

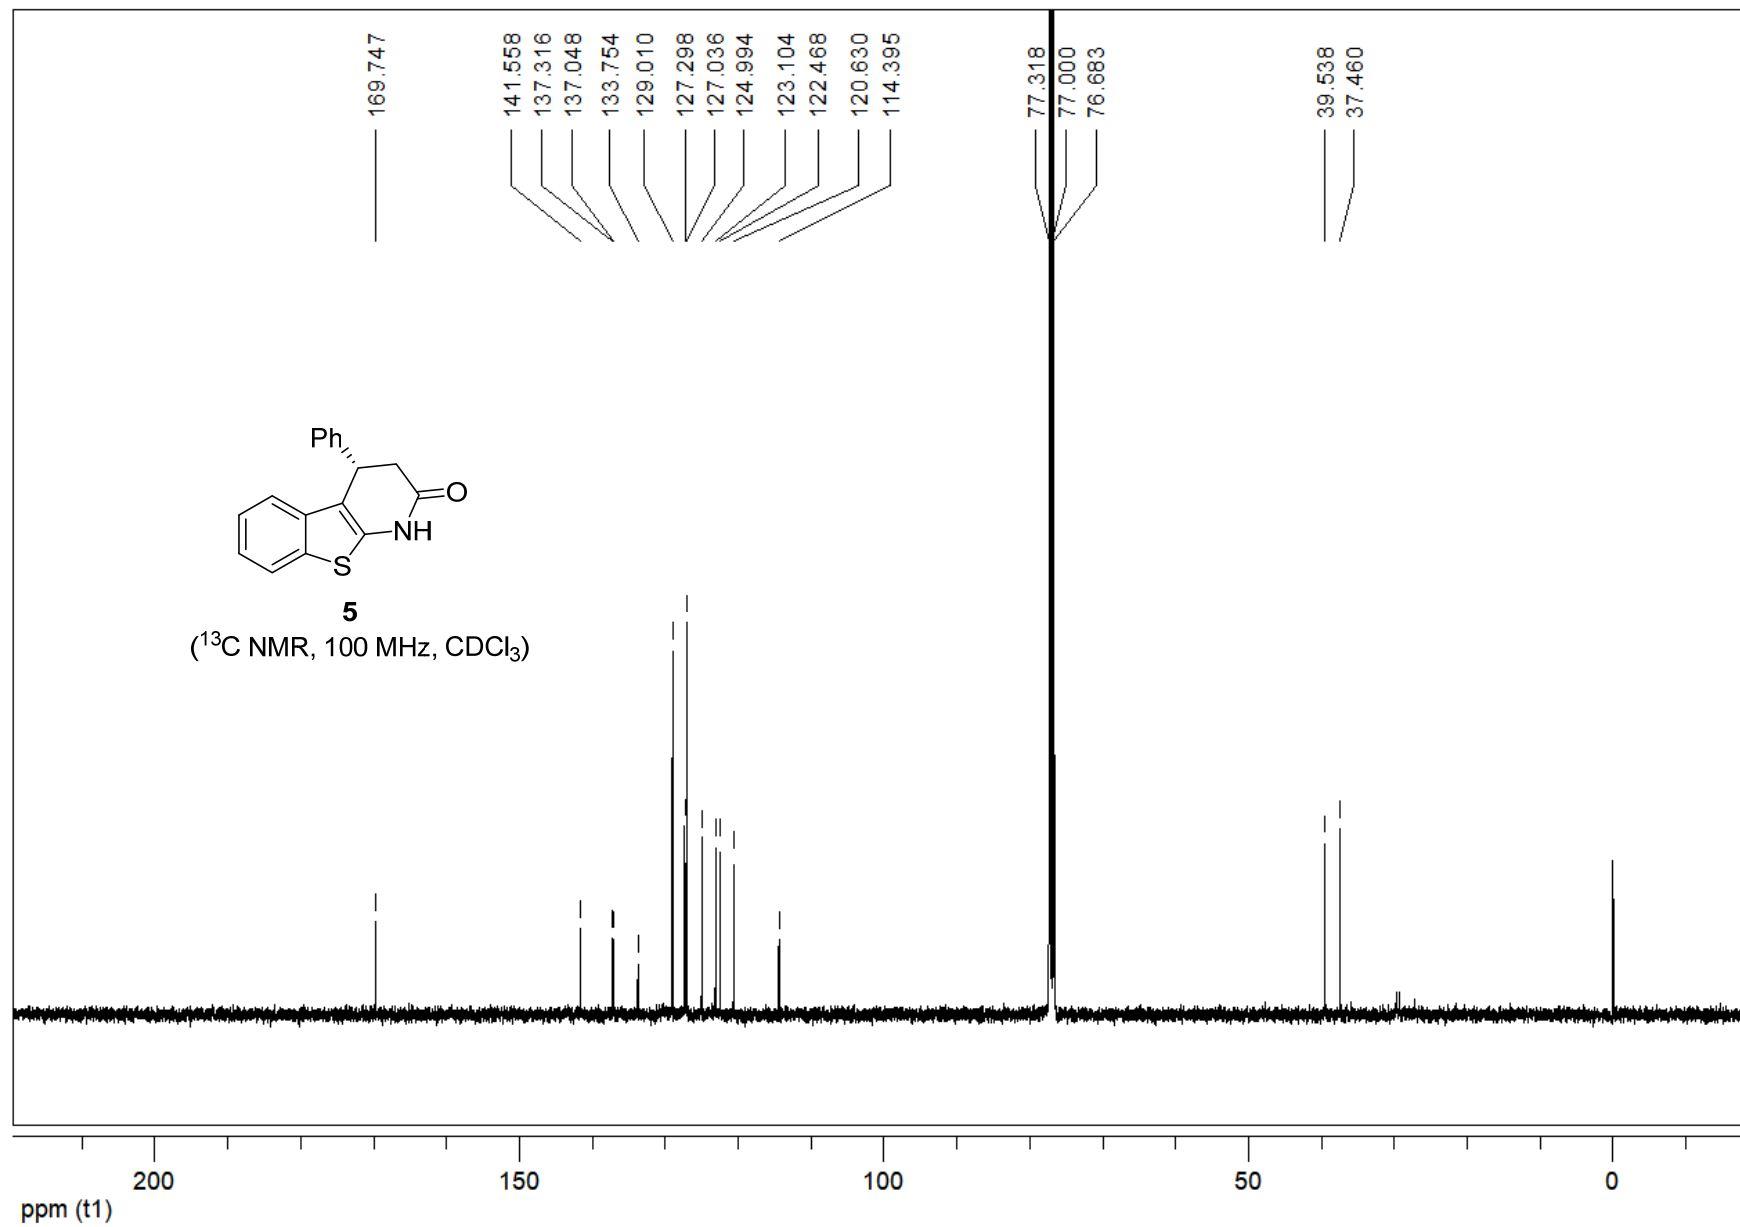

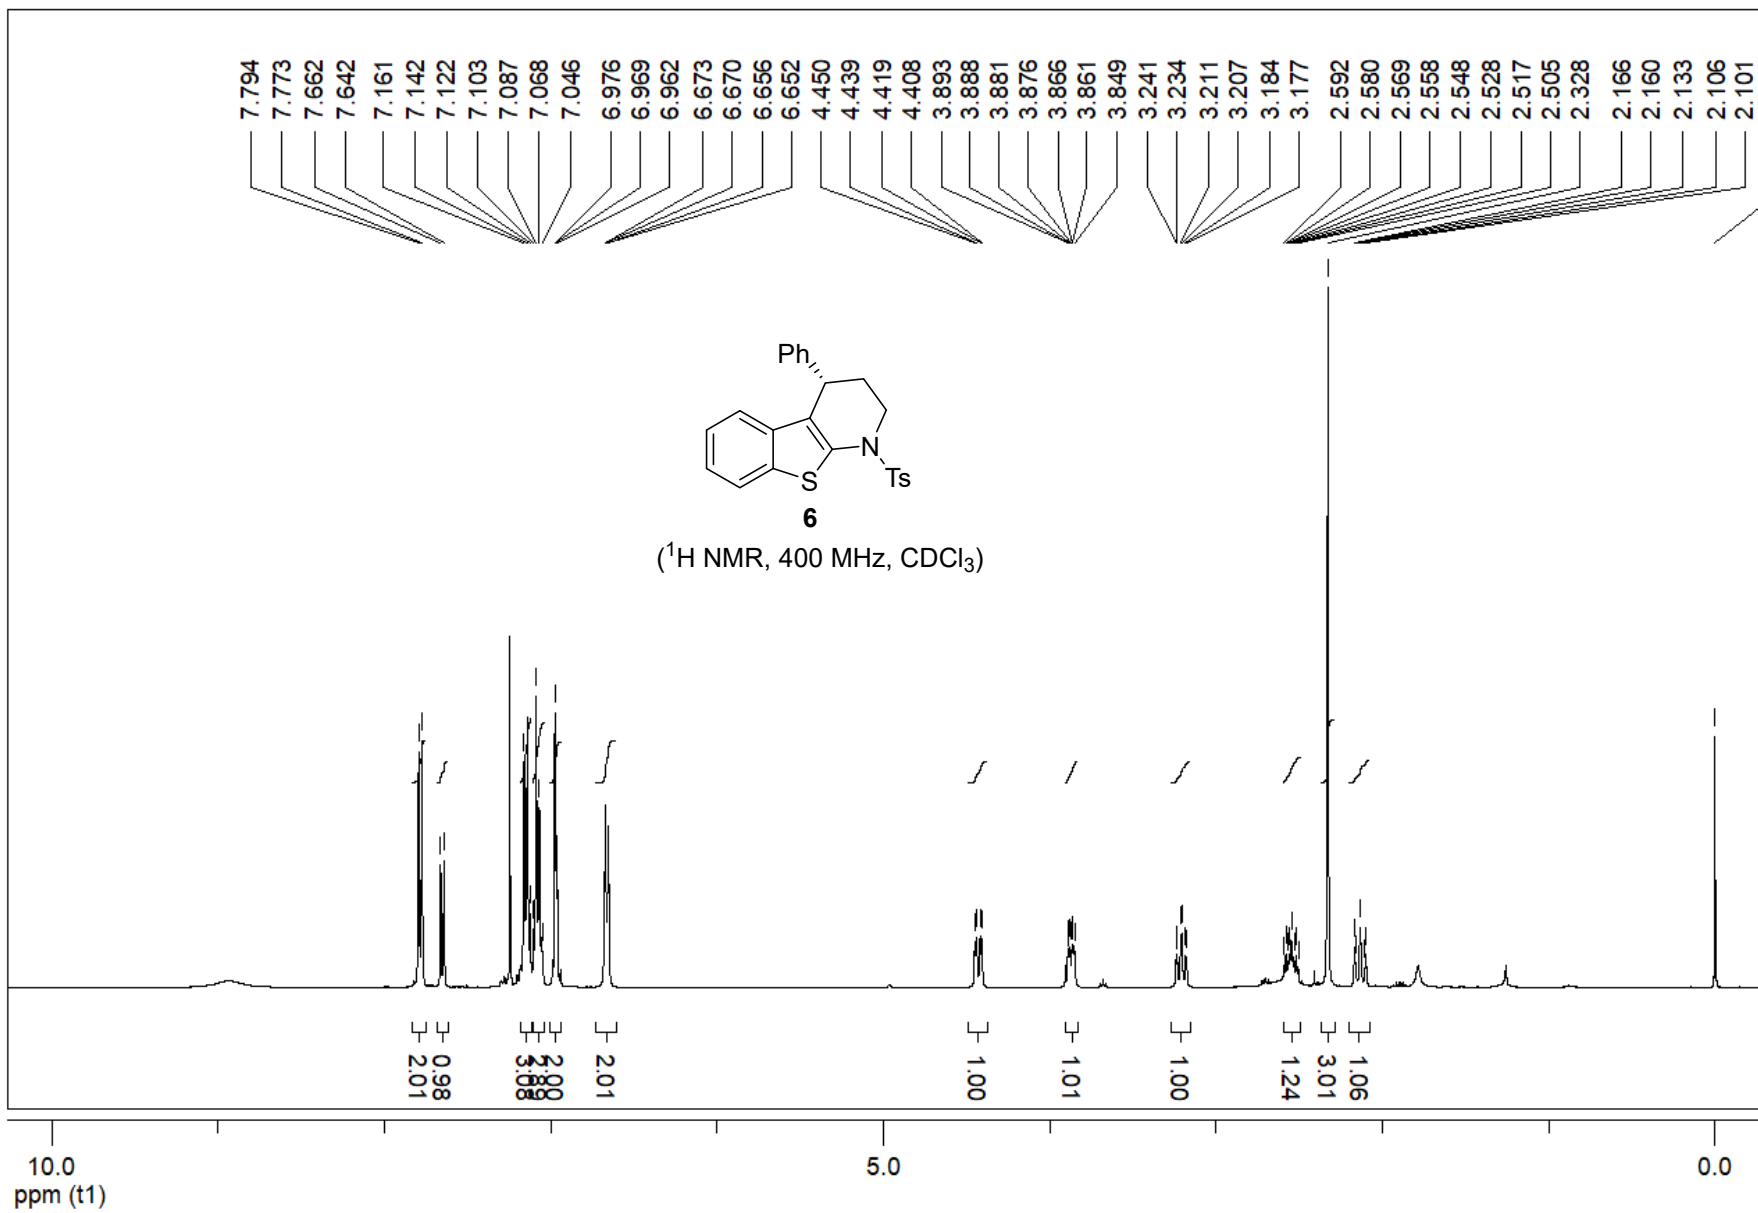

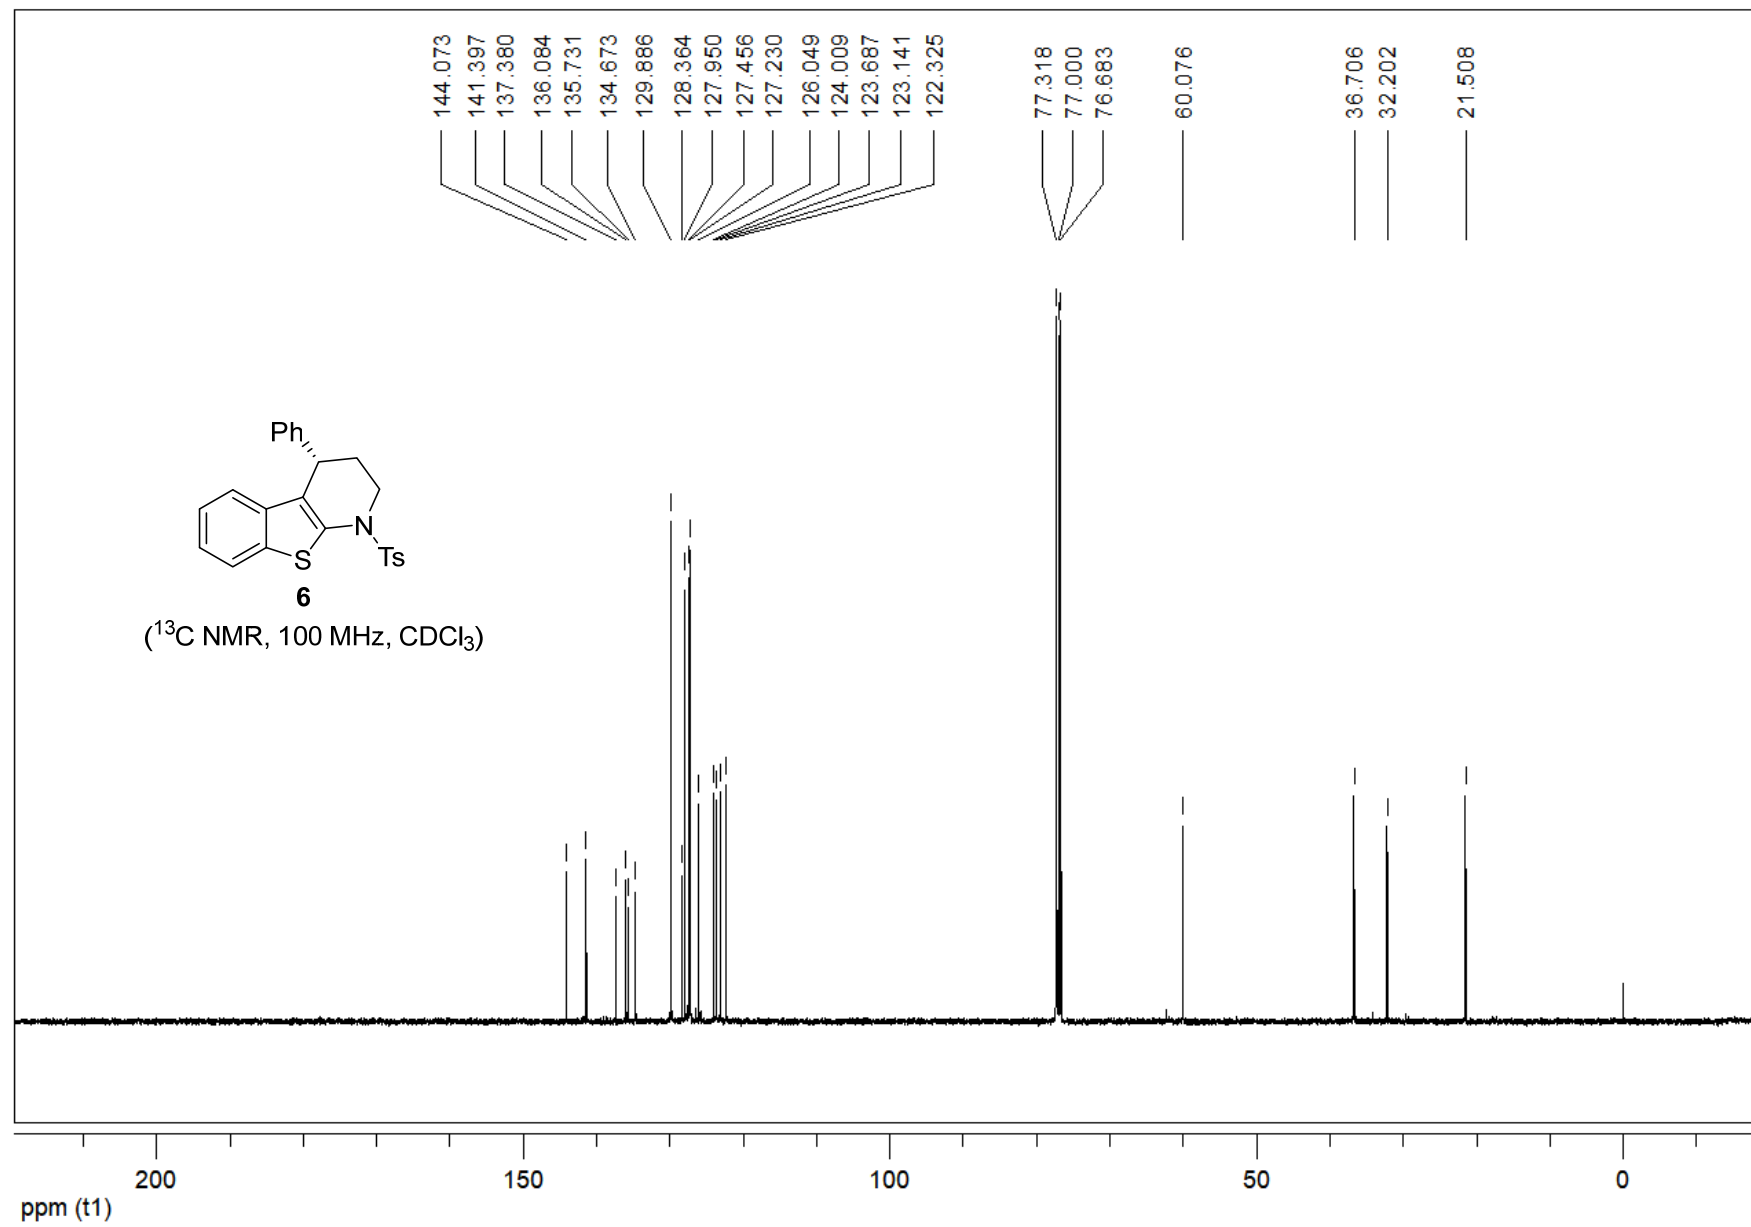

## 8. Copies of HPLC chromatograms of new products

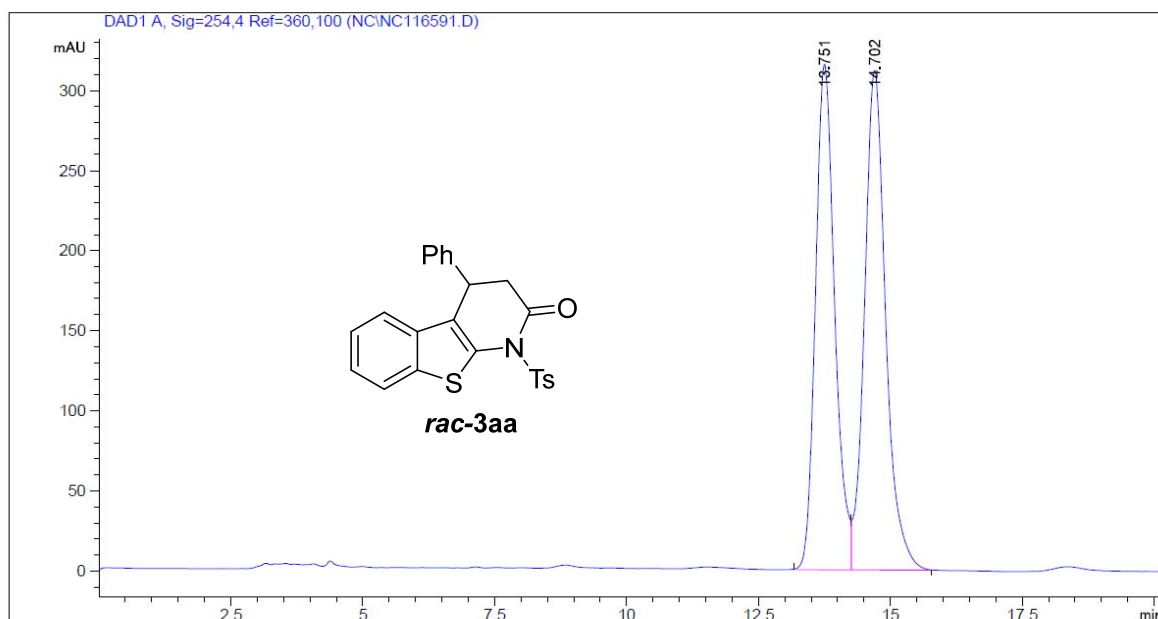

| Peak # | Ret Time [min] | Type | Width [min] | Area [mAU*s] | Height [mAU] | Area %  |
|--------|----------------|------|-------------|--------------|--------------|---------|
| 1      | 13.751         | BV   | 0.3873      | 7986.53271   | 315.55652    | 47.8116 |
| 2      | 14.702         | VB   | 0.4241      | 8717.63672   | 311.93054    | 52.1884 |

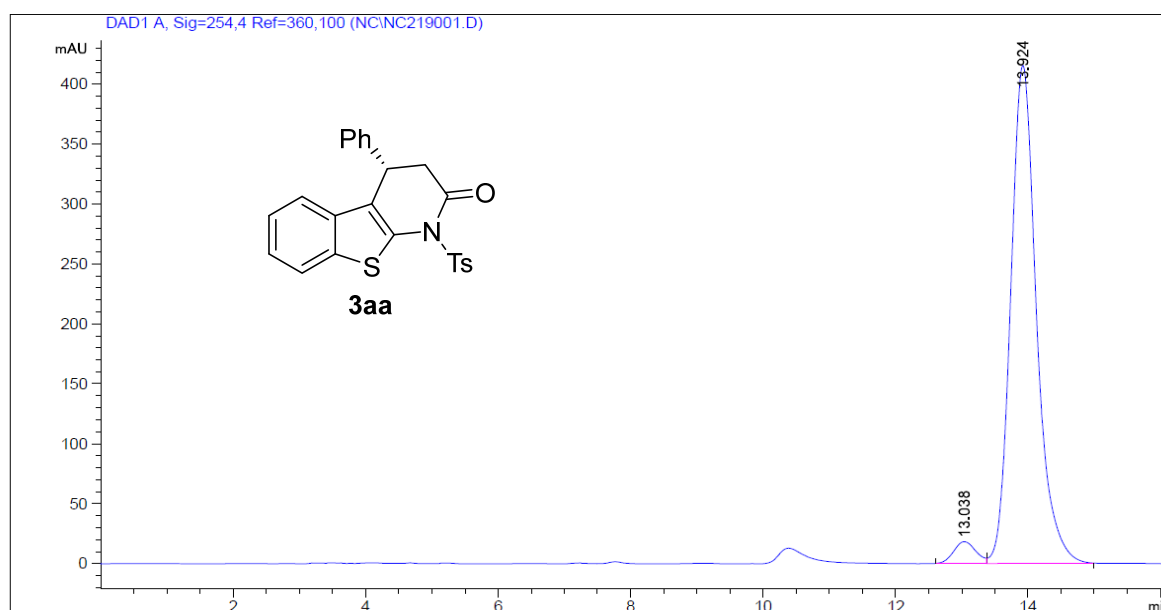

| Peak # | Ret Time [min] | Type | Width [min] | Area [mAU*s] | Height [mAU] | Area %  |
|--------|----------------|------|-------------|--------------|--------------|---------|
| 1      | 13.038         | BV   | 0.3543      | 421.42908    | 18.18786     | 3.6156  |
| 2      | 13.924         | VB   | 0.4134      | 1.12345e4    | 415.61453    | 96.3844 |

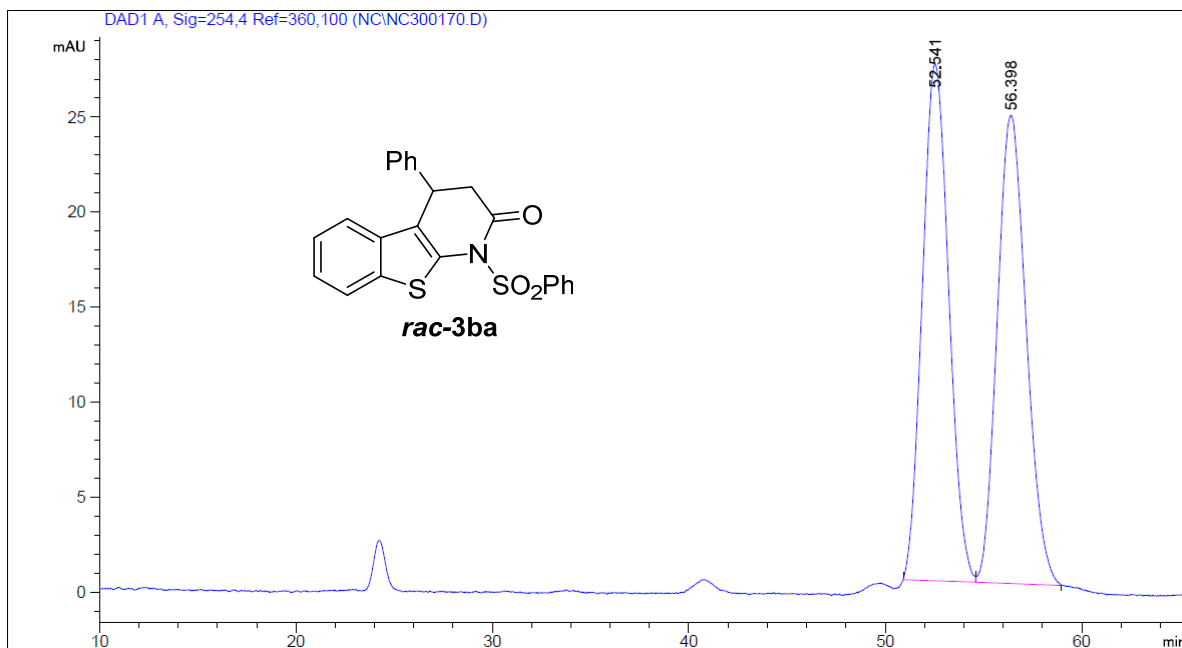

| Peak # | Ret Time [min] | Type | Width [min] | Area [mAU*s] | Height [mAU] | Area %  |
|--------|----------------|------|-------------|--------------|--------------|---------|
| 1      | 52.541         | BV   | 1.1079      | 2548.18530   | 27.17798     | 50.1770 |
| 2      | 56.398         | VB   | 1.2117      | 2530.21118   | 24.64649     | 49.8230 |

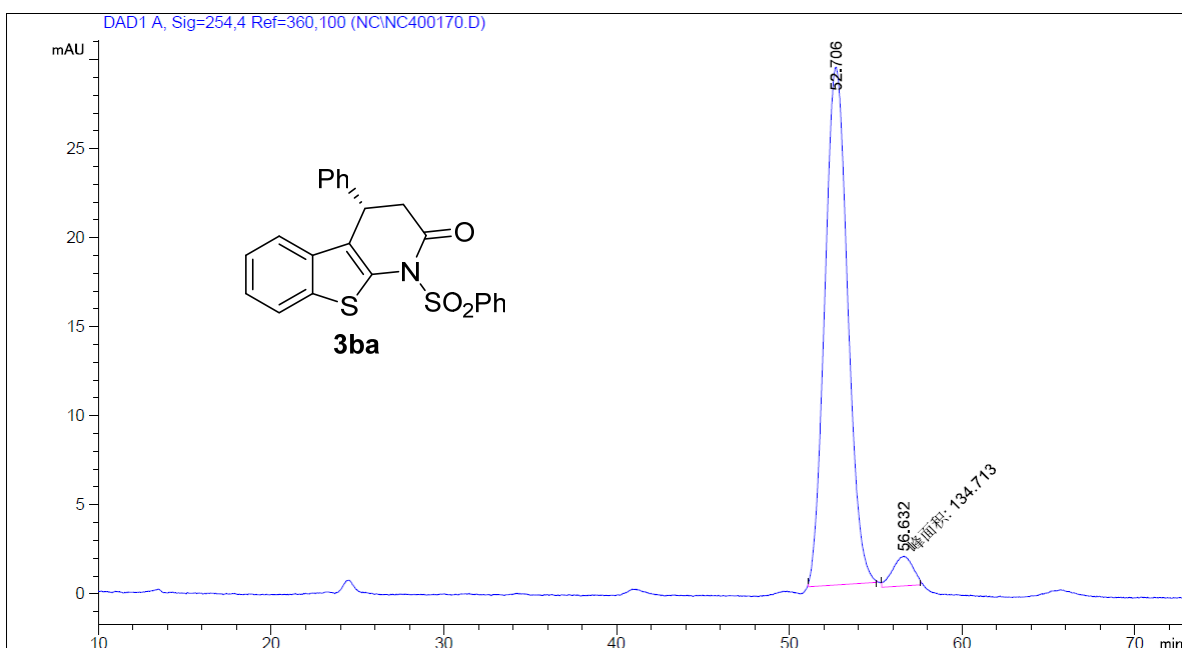

| Peak # | Ret Time [min] | Type | Width [min] | Area [mAU*s] | Height [mAU] | Area %  |
|--------|----------------|------|-------------|--------------|--------------|---------|
| 1      | 52.706         | BB   | 1.1806      | 2684.38599   | 29.08891     | 95.2214 |
| 2      | 56.632         | MM   | 1.3451      | 134.71315    | 1.66917      | 4.7786  |

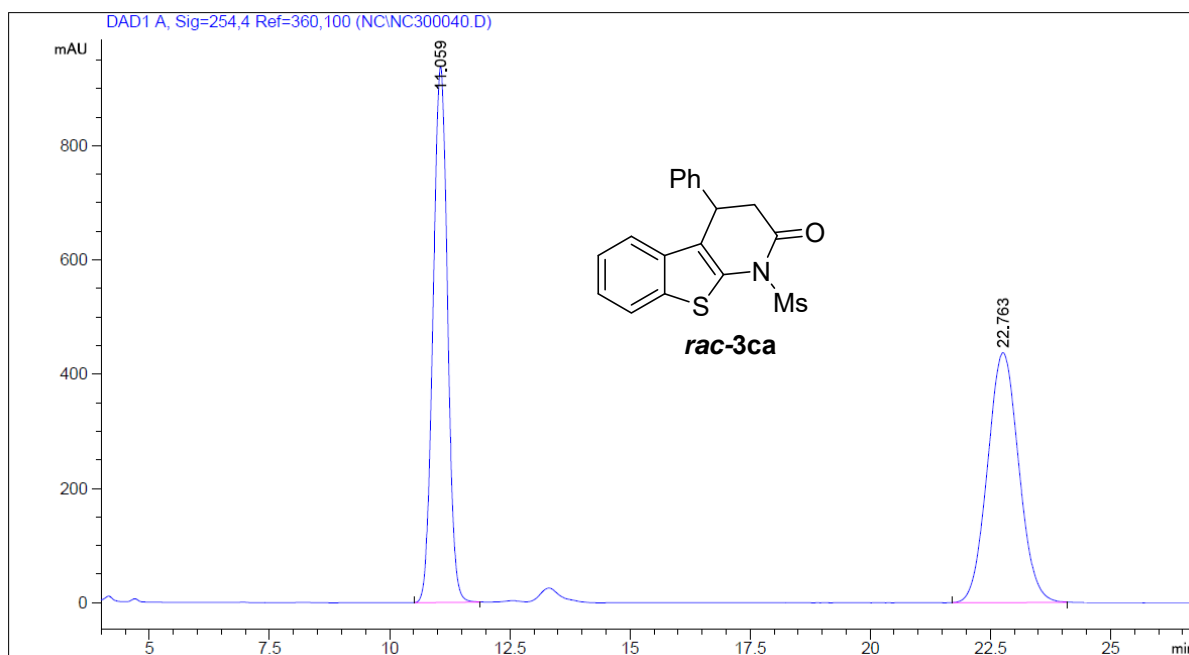

| Peak # | Ret Time [min] | Type | Width [min] | Area [mAU*s] | Height [mAU] | Area %  |
|--------|----------------|------|-------------|--------------|--------------|---------|
| 1      | 11.059         | BB   | 0.3302      | 1.96189e4    | 937.21484    | 49.8276 |
| 2      | 22.763         | BB   | 0.7052      | 1.97547e4    | 437.14502    | 50.1724 |

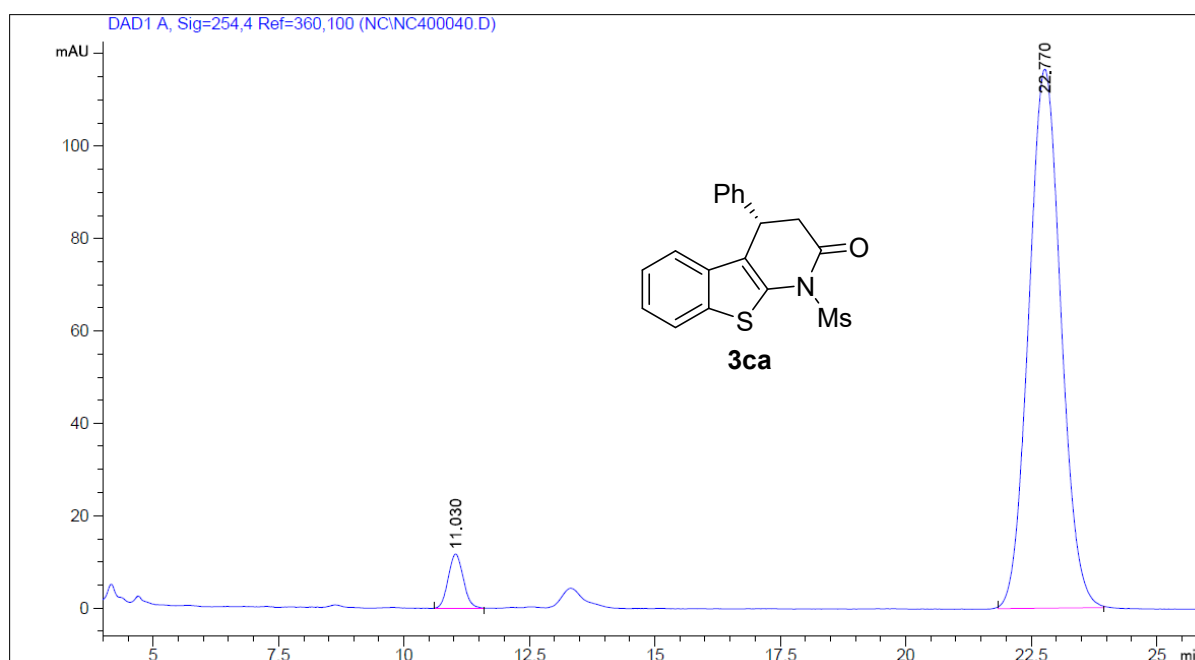

| Peak # | Ret Time [min] | Type | Width [min] | Area [mAU*s] | Height [mAU] | Area %  |
|--------|----------------|------|-------------|--------------|--------------|---------|
| 1      | 11.030         | BB   | 0.3261      | 243.51080    | 11.73695     | 4.4611  |
| 2      | 22.770         | BB   | 0.6933      | 5215.04834   | 116.71575    | 95.5389 |



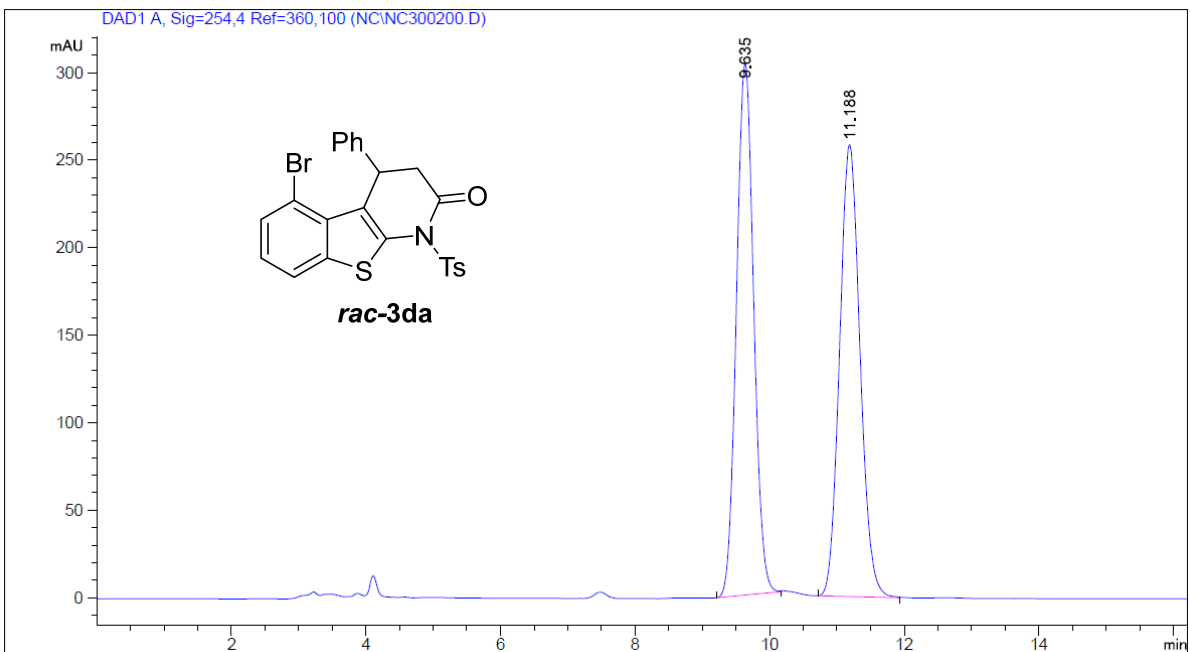

| Peak # | Ret Time [min] | Type | Width [min] | Area [mAU*s] | Height [mAU] | Area %  |
|--------|----------------|------|-------------|--------------|--------------|---------|
| 1      | 9.635          | BB   | 0.2795      | 5398.69873   | 303.52084    | 49.7906 |
| 2      | 11.188         | BB   | 0.3281      | 5444.11475   | 258.07324    | 50.2094 |

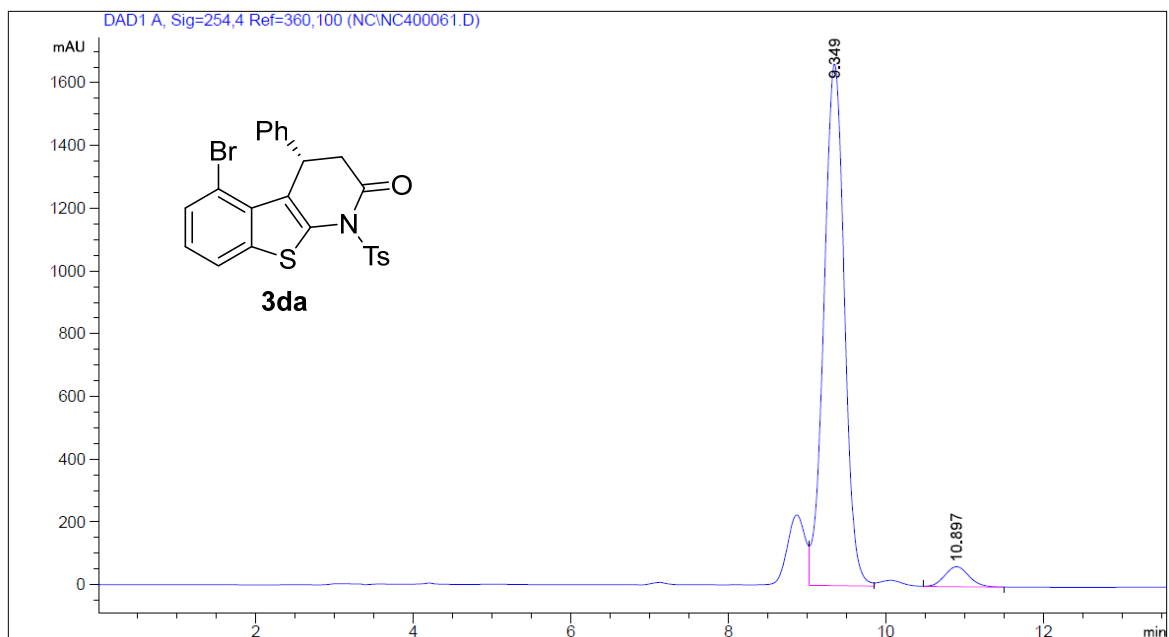

| Peak # | Ret Time [min] | Type | Width [min] | Area [mAU*s] | Height [mAU] | Area %  |
|--------|----------------|------|-------------|--------------|--------------|---------|
| 1      | 9.349          | VV   | 0.2829      | 3.00678e4    | 1663.15540   | 95.6679 |
| 2      | 10.897         | VB   | 0.3282      | 1361.55457   | 64.00226     | 4.3321  |

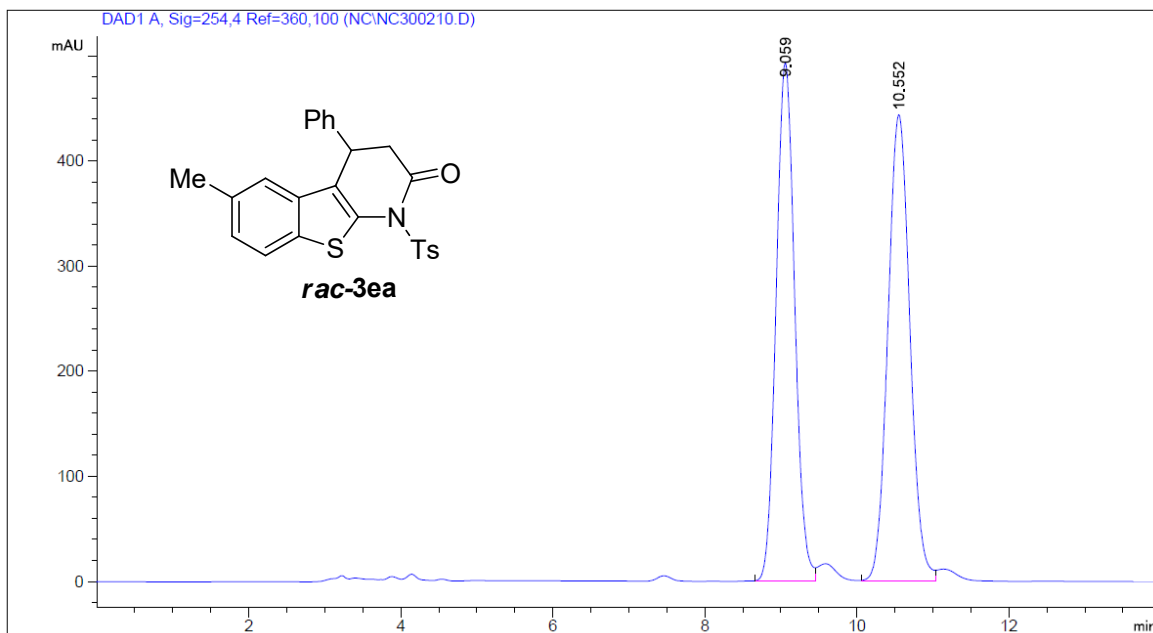

| Peak # | Ret Time [min] | Type | Width [min] | Area [mAU*s] | Height [mAU] | Area %  |
|--------|----------------|------|-------------|--------------|--------------|---------|
| 1      | 9.059          | BV   | 0.2636      | 8353.78809   | 493.13474    | 48.3554 |
| 2      | 10.552         | BV   | 0.3126      | 8922.04004   | 443.64987    | 51.6446 |

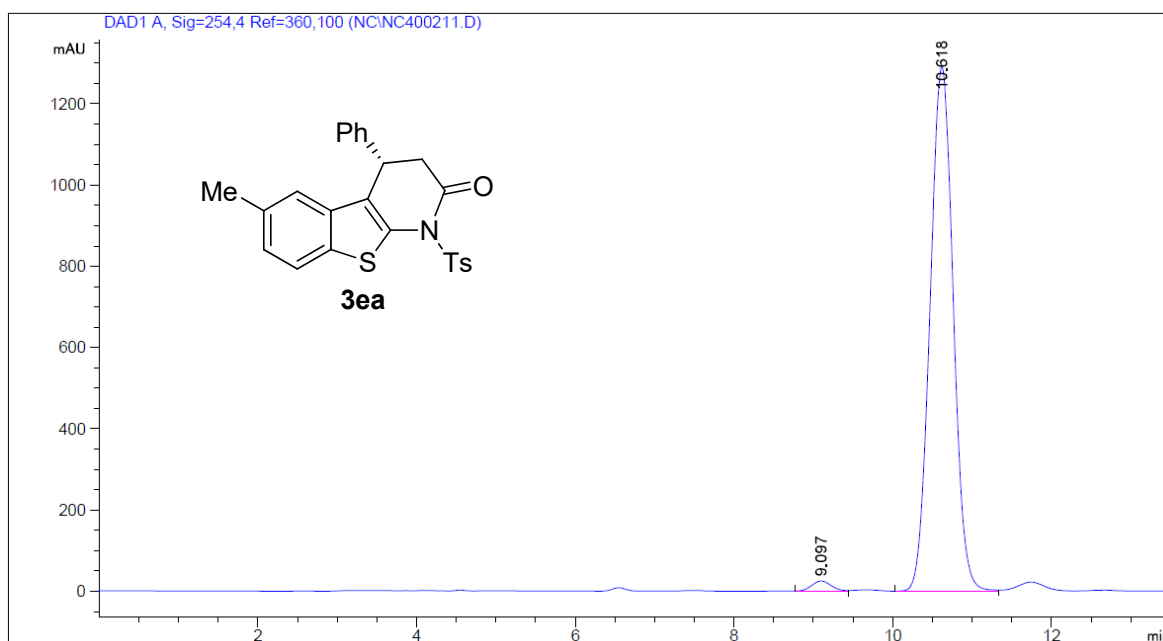

| Peak # | Ret Time [min] | Type | Width [min] | Area [mAU*s] | Height [mAU] | Area %  |
|--------|----------------|------|-------------|--------------|--------------|---------|
| 1      | 9.097          | BV   | 0.2665      | 427.37720    | 24.86376     | 1.6111  |
| 2      | 10.618         | VV   | 0.3157      | 2.60999e4    | 1291.80615   | 98.3889 |

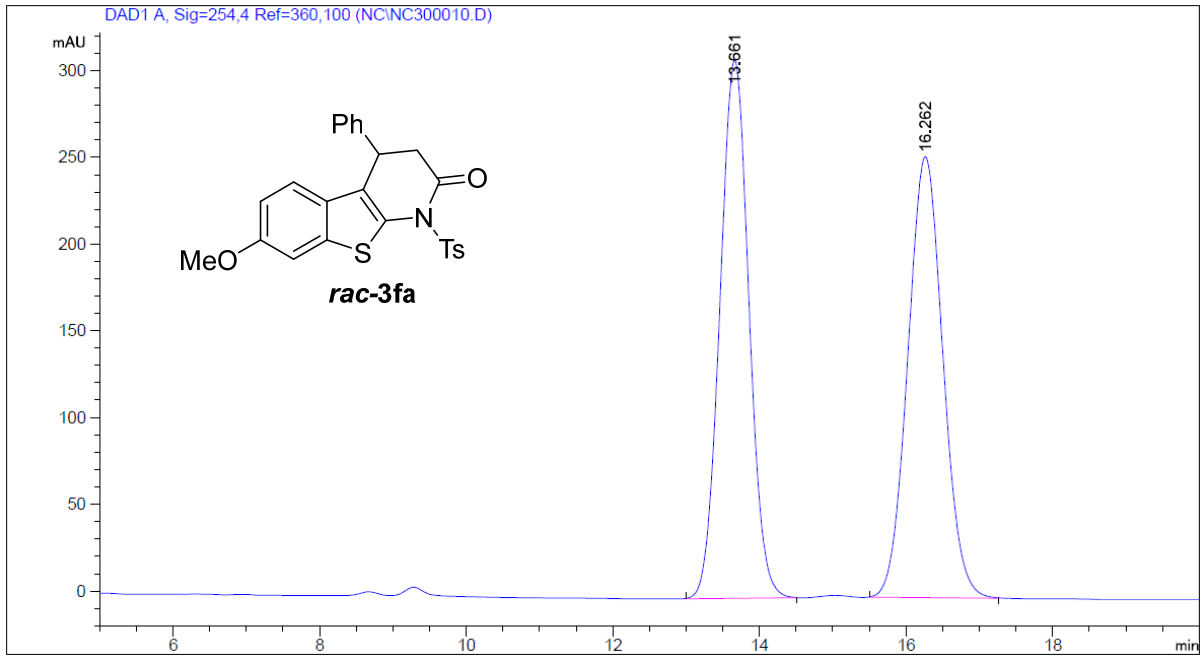

| Peak # | Ret Time [min] | Type | Width [min] | Area [mAU*s] | Height [mAU] | Area %  |
|--------|----------------|------|-------------|--------------|--------------|---------|
| 1      | 13.661         | BB   | 0.4261      | 8511.75098   | 310.25751    | 50.2462 |
| 2      | 16.262         | BB   | 0.5149      | 8428.33887   | 254.17671    | 49.7538 |

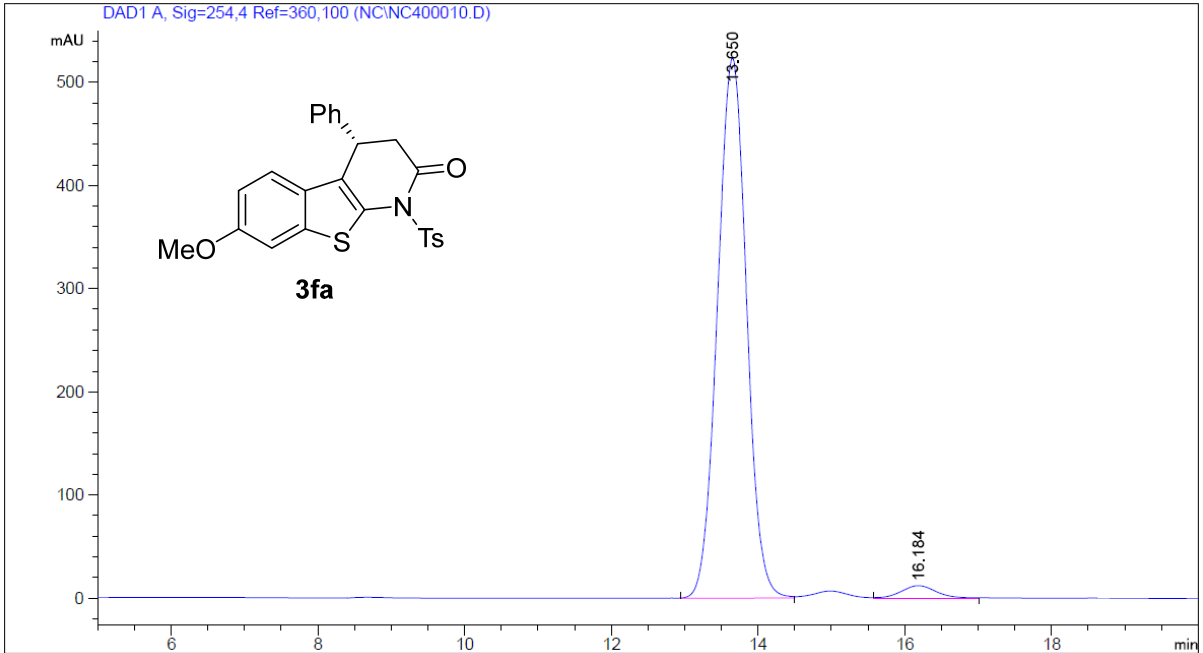

| Peak # | Ret Time [min] | Type | Width [min] | Area [mAU*s] | Height [mAU] | Area %  |
|--------|----------------|------|-------------|--------------|--------------|---------|
| 1      | 13.650         | BB   | 0.4303      | 1.43693e4    | 523.40735    | 97.3705 |
| 2      | 16.184         | VB   | 0.4804      | 388.04501    | 11.90083     | 2.6295  |

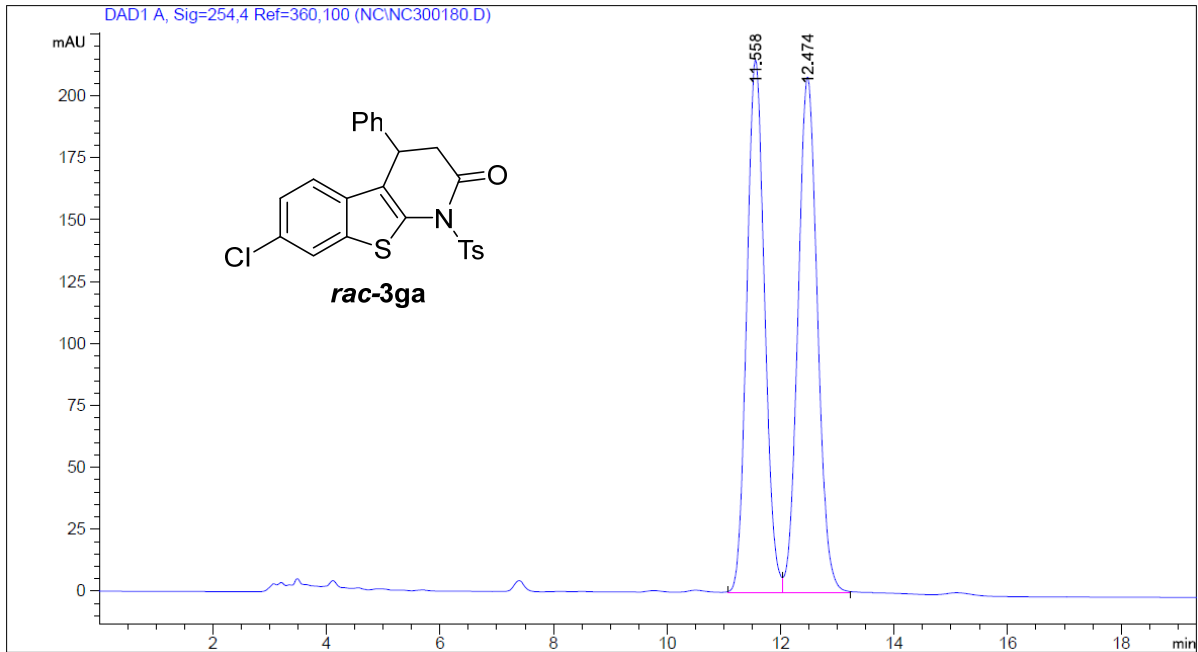

| Peak # | Ret Time [min] | Type | Width [min] | Area [mAU*s] | Height [mAU] | Area %  |
|--------|----------------|------|-------------|--------------|--------------|---------|
| 1      | 11.558         | BV   | 0.3397      | 4676.08008   | 215.00439    | 48.6148 |
| 2      | 12.474         | VB   | 0.3691      | 4942.56348   | 208.10487    | 51.3852 |

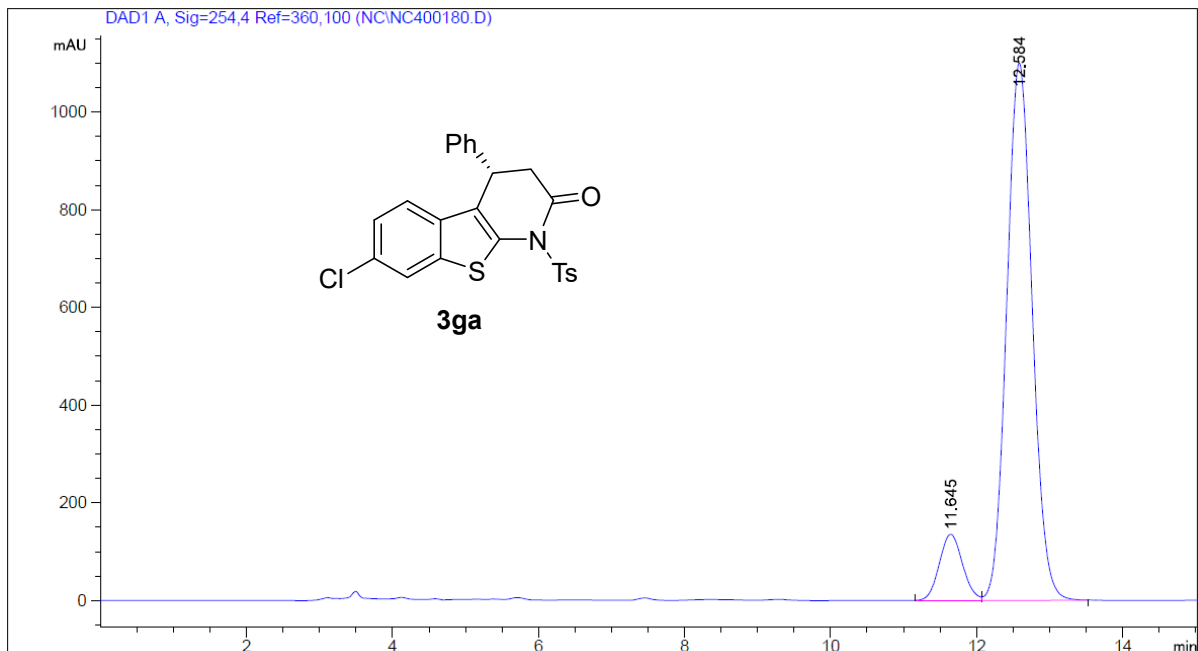

| Peak # | Ret Time [min] | Type | Width [min] | Area [mAU*s] | Height [mAU] | Area %  |
|--------|----------------|------|-------------|--------------|--------------|---------|
| 1      | 11.645         | BV   | 0.3441      | 2994.90894   | 135.36989    | 10.0956 |
| 2      | 12.584         | VB   | 0.3789      | 2.66707e4    | 1099.87000   | 89.9044 |

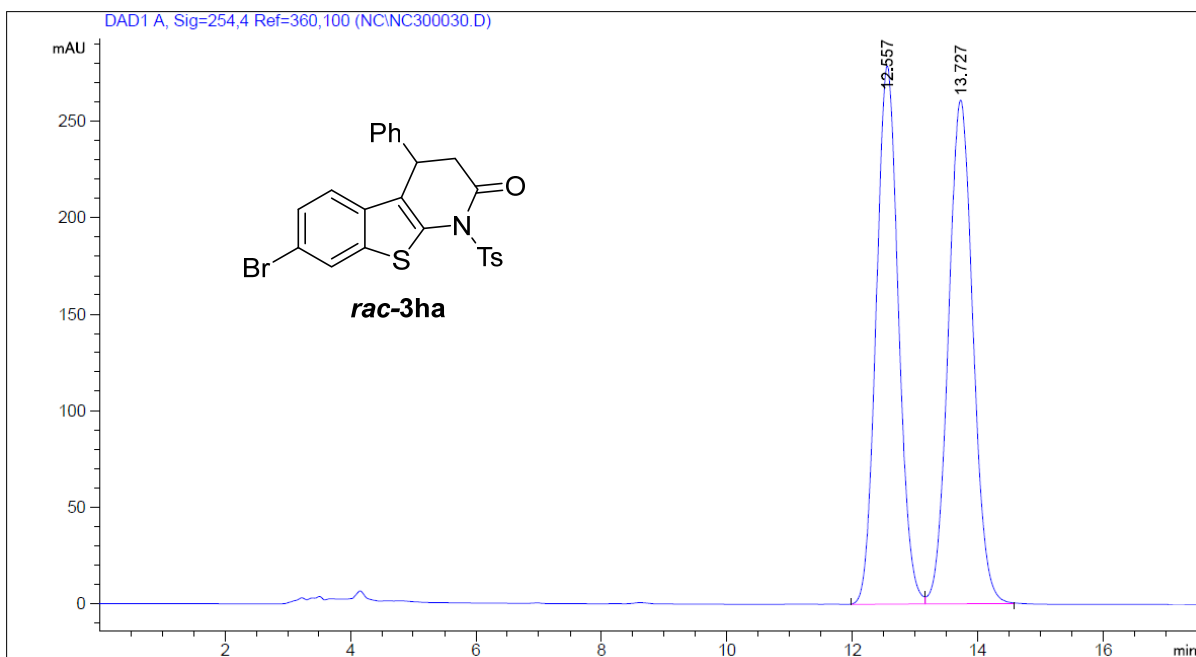

| Peak # | Ret Time [min] | Type | Width [min] | Area [mAU*s] | Height [mAU] | Area %  |
|--------|----------------|------|-------------|--------------|--------------|---------|
| 1      | 12.557         | BV   | 0.3825      | 6902.67383   | 279.15970    | 49.2203 |
| 2      | 13.727         | VB   | 0.4241      | 7121.35400   | 261.20193    | 50.7797 |

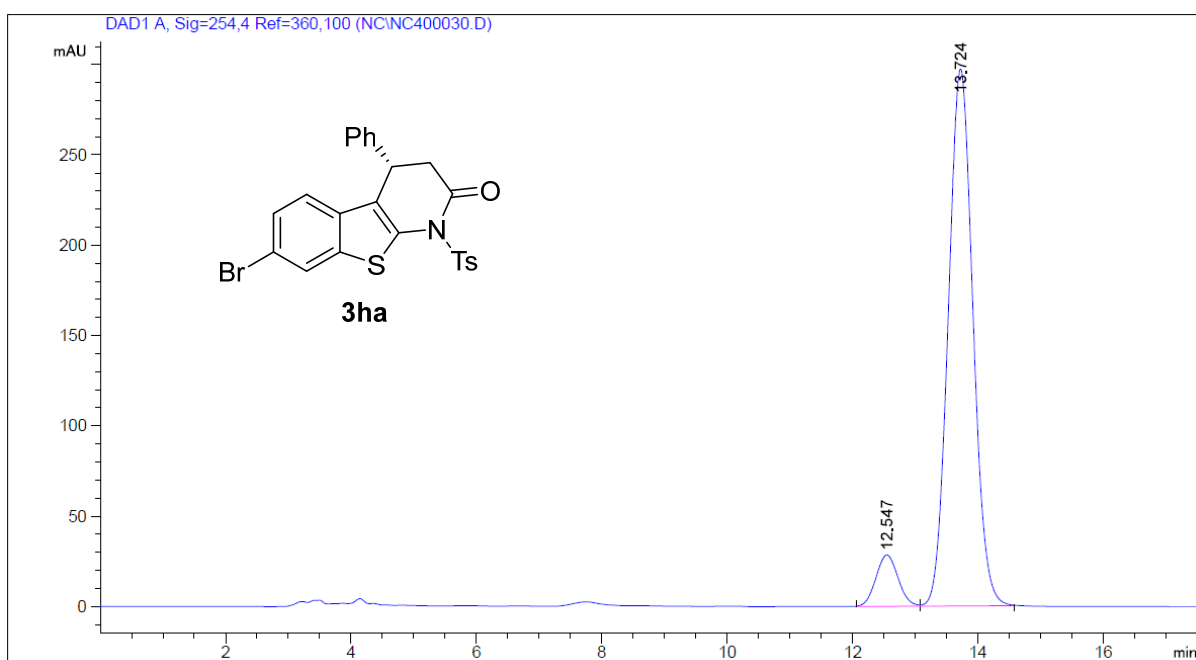

| Peak # | Ret Time [min] | Type | Width [min] | Area [mAU*s] | Height [mAU] | Area %  |
|--------|----------------|------|-------------|--------------|--------------|---------|
| 1      | 12.547         | BV   | 0.3800      | 696.96423    | 28.42969     | 7.9082  |
| 2      | 13.724         | VB   | 0.4225      | 8116.26660   | 297.27014    | 92.0918 |

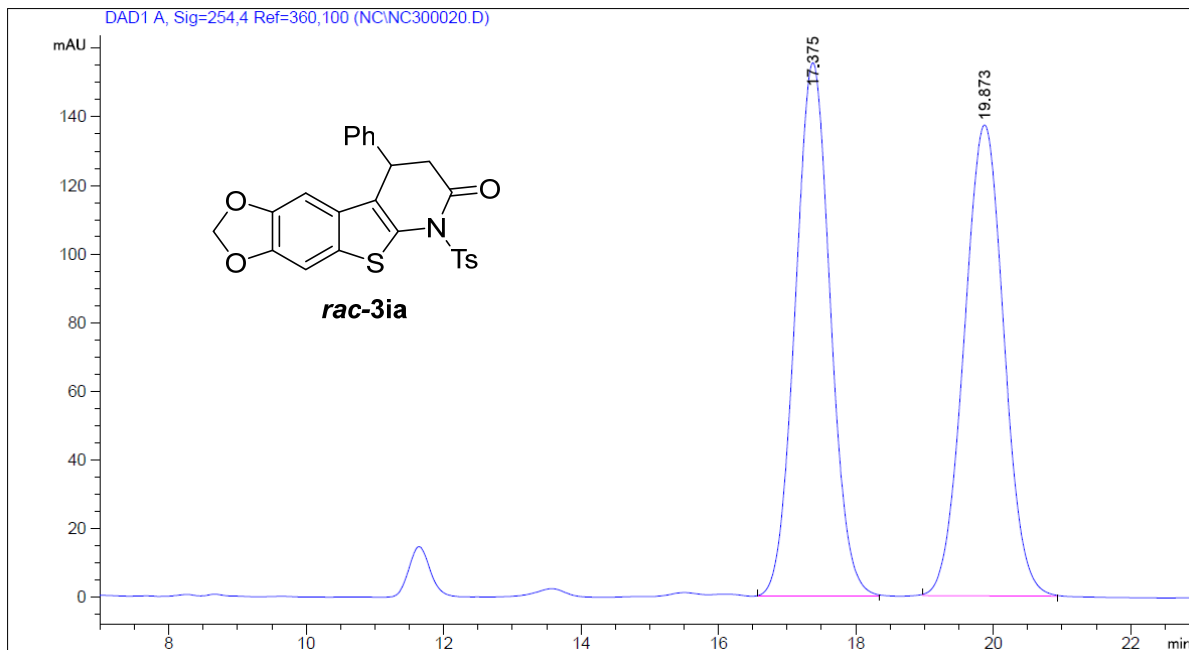

| Peak # | Ret Time [min] | Type | Width [min] | Area [mAU*s] | Height [mAU] | Area %  |
|--------|----------------|------|-------------|--------------|--------------|---------|
| 1      | 17.375         | BB   | 0.5537      | 5509.42139   | 155.36263    | 49.9181 |
| 2      | 19.873         | BB   | 0.6279      | 5527.48926   | 137.24570    | 50.0819 |

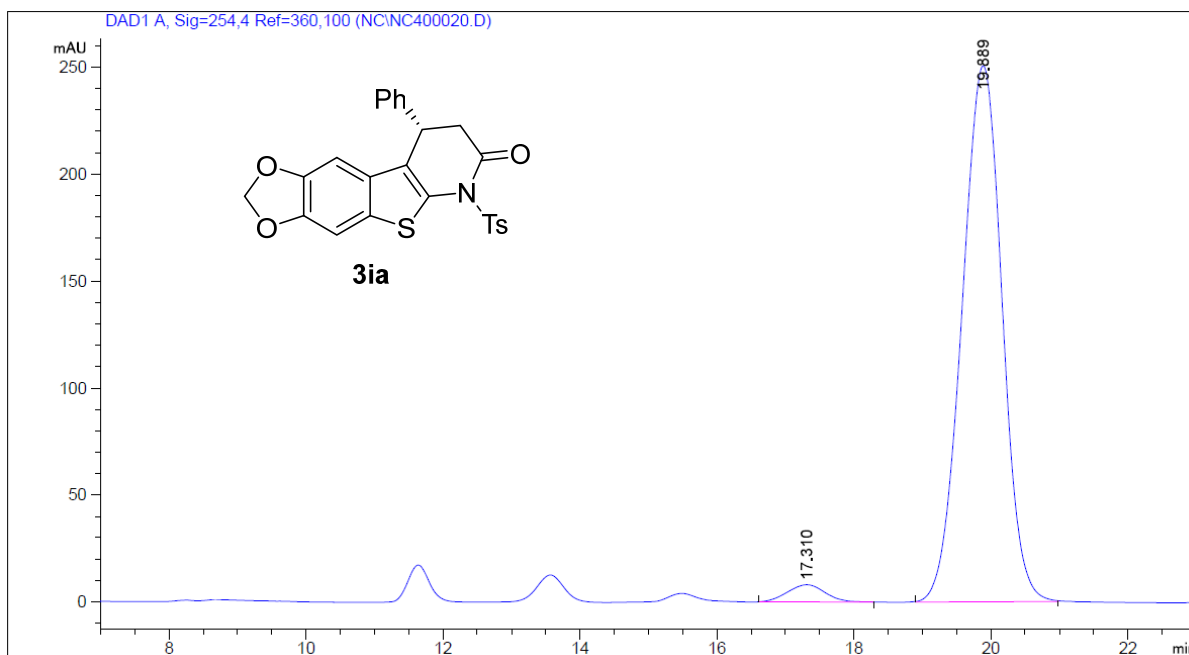

| Peak # | Ret Time [min] | Type | Width [min] | Area [mAU*s] | Height [mAU] | Area %  |
|--------|----------------|------|-------------|--------------|--------------|---------|
| 1      | 17.310         | BB   | 0.5097      | 309.14429    | 8.05665      | 2.9478  |
| 2      | 19.889         | BB   | 0.6380      | 1.01782e4    | 250.52324    | 97.0522 |

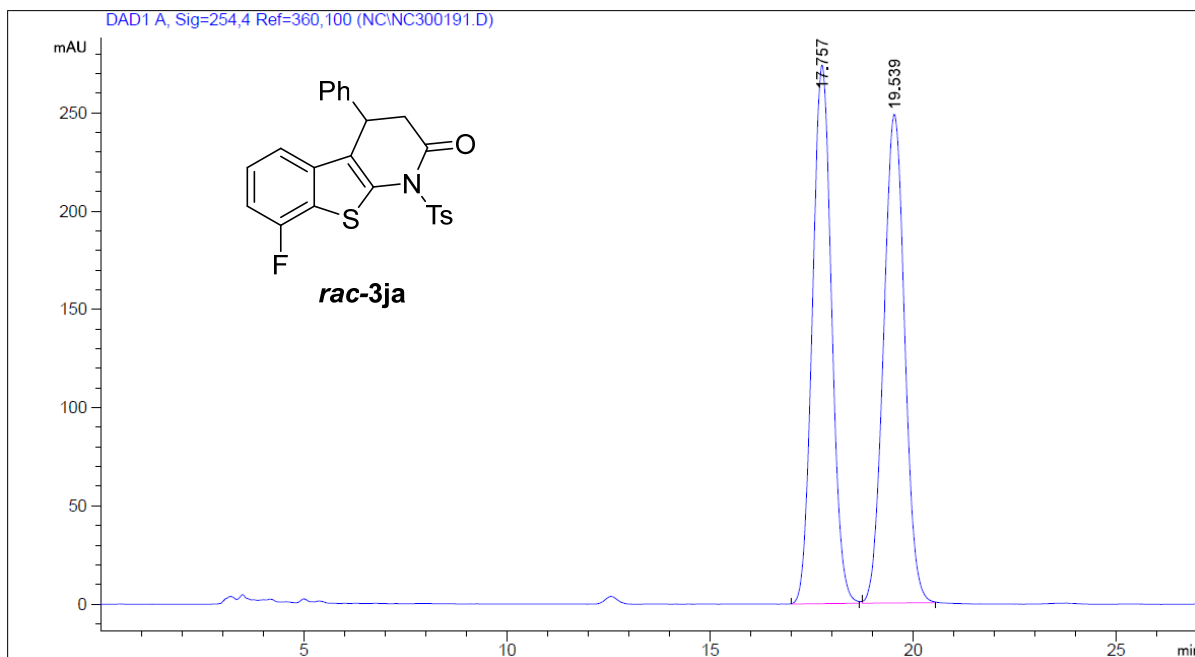

| Peak # | Ret Time [min] | Type | Width [min] | Area [mAU*s] | Height [mAU] | Area %  |
|--------|----------------|------|-------------|--------------|--------------|---------|
| 1      | 17.757         | BB   | 0.5135      | 9007.42285   | 274.02225    | 50.0805 |
| 2      | 19.539         | BB   | 0.5674      | 8978.46387   | 248.60107    | 49.9195 |

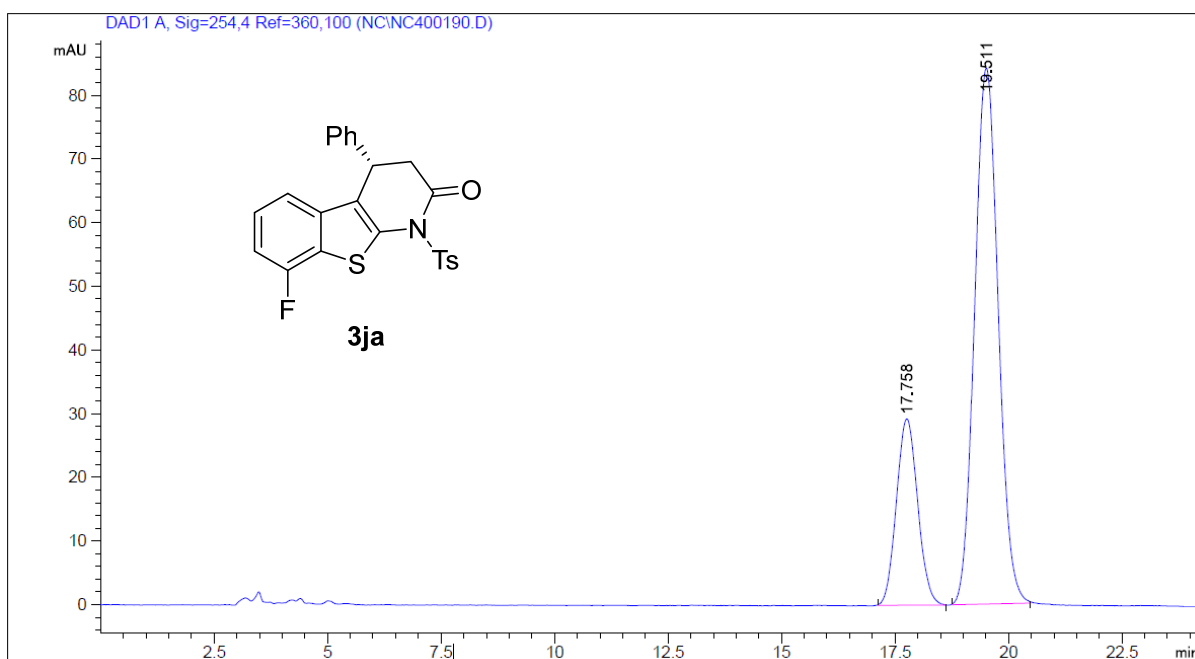

| Peak # | Ret Time [min] | Type | Width [min] | Area [mAU*s] | Height [mAU] | Area %  |
|--------|----------------|------|-------------|--------------|--------------|---------|
| 1      | 17.758         | BB   | 0.5076      | 952.75226    | 29.28067     | 23.8225 |
| 2      | 19.511         | BB   | 0.5680      | 3046.62866   | 84.22534     | 76.1775 |

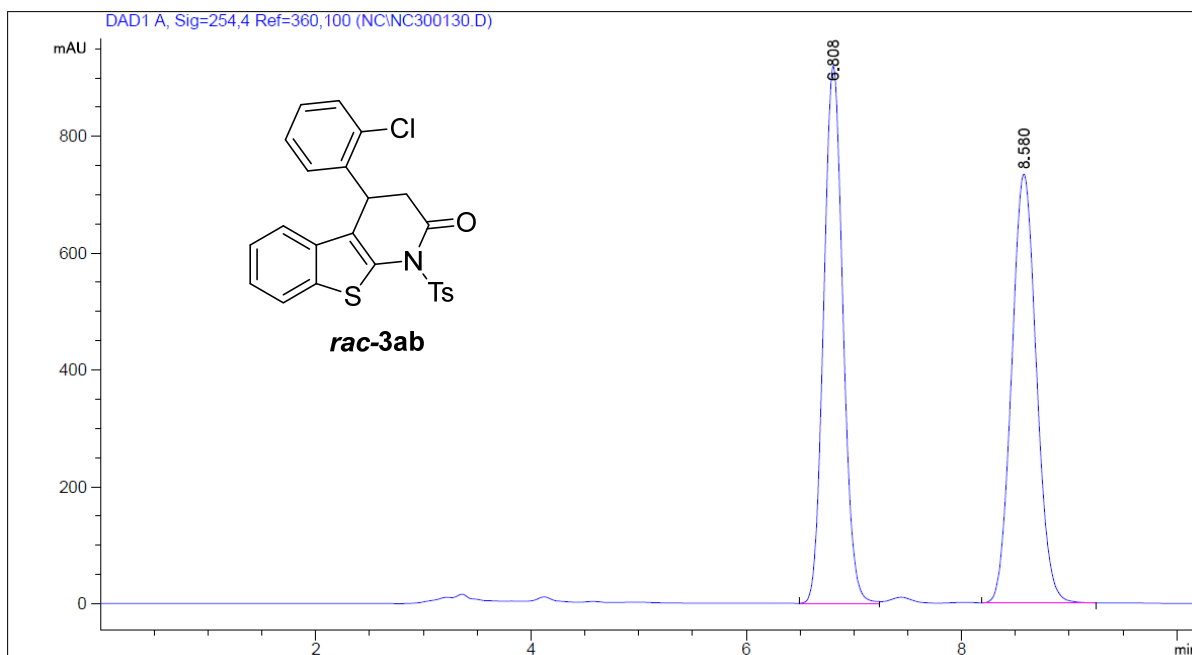

| Peak # | Ret Time [min] | Type | Width [min] | Area [mAU*s] | Height [mAU] | Area %  |
|--------|----------------|------|-------------|--------------|--------------|---------|
| 1      | 6.808          | BV   | 0.1952      | 1.14534e4    | 920.02765    | 49.4340 |
| 2      | 8.580          | VB   | 0.2501      | 1.17157e4    | 734.54230    | 50.5660 |

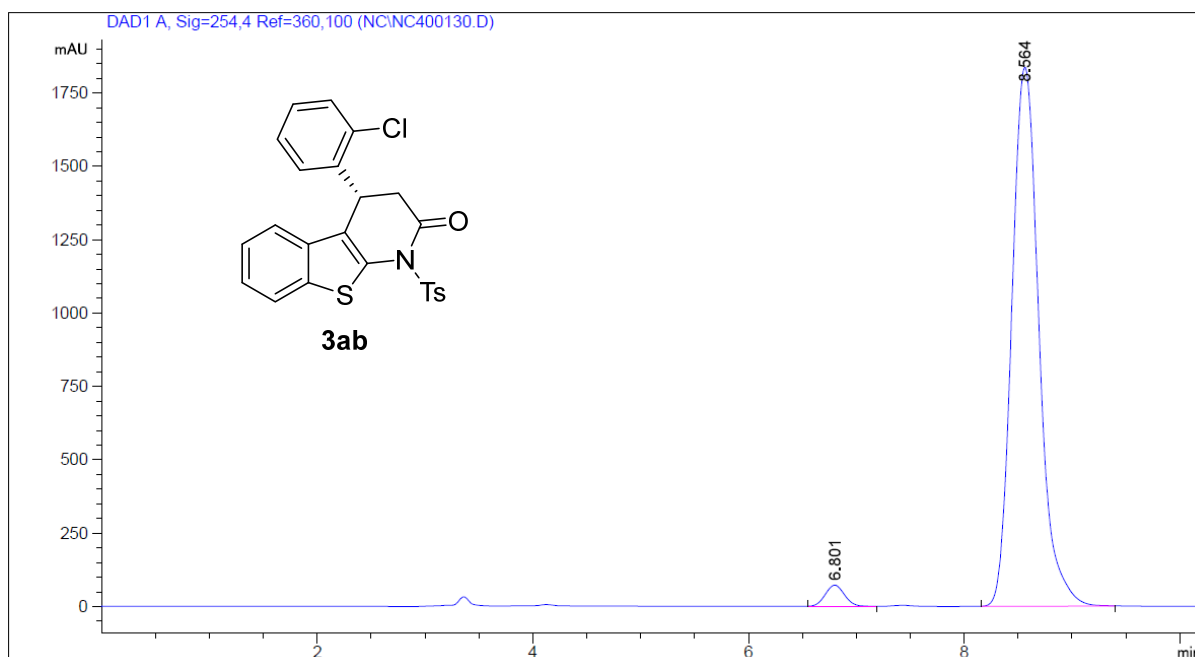

| Peak # | Ret Time [min] | Type | Width [min] | Area [mAU*s] | Height [mAU] | Area %  |
|--------|----------------|------|-------------|--------------|--------------|---------|
| 1      | 6.801          | BB   | 0.1933      | 899.92670    | 72.27006     | 2.7366  |
| 2      | 8.564          | BB   | 0.2710      | 3.19851e4    | 1838.12048   | 97.2634 |



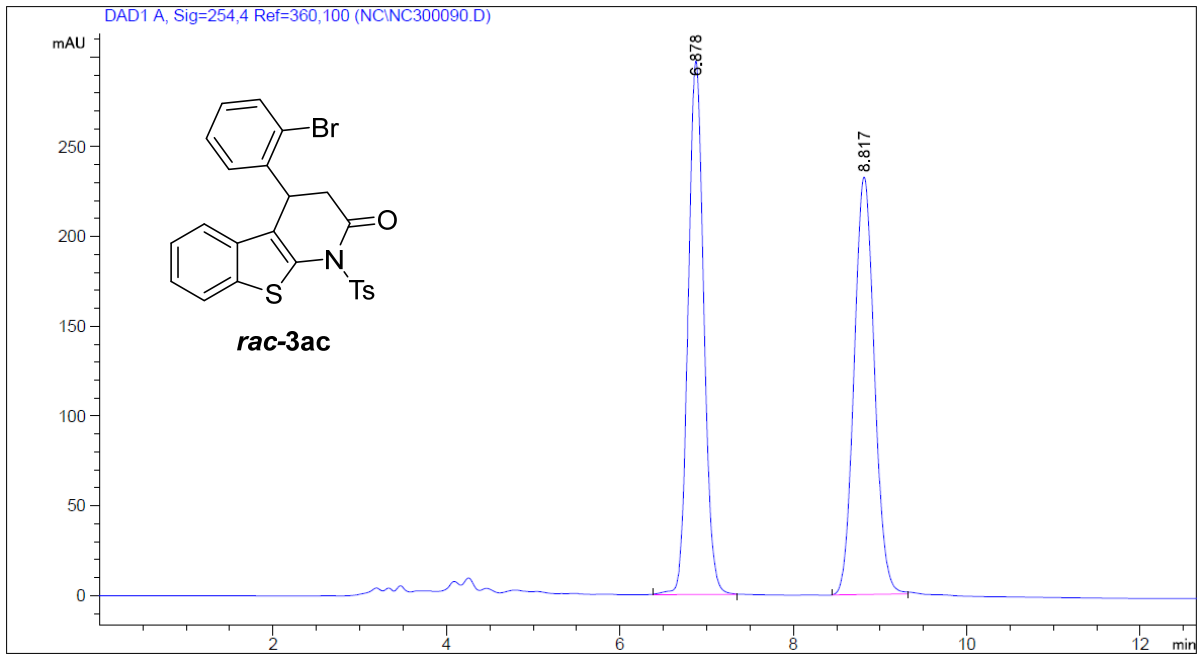

| Peak # | Ret Time [min] | Type | Width [min] | Area [mAU*s] | Height [mAU] | Area %  |
|--------|----------------|------|-------------|--------------|--------------|---------|
| 1      | 6.878          | BB   | 0.1940      | 3723.20972   | 297.44339    | 49.6803 |
| 2      | 8.817          | BB   | 0.2532      | 3771.12158   | 232.58052    | 50.3197 |

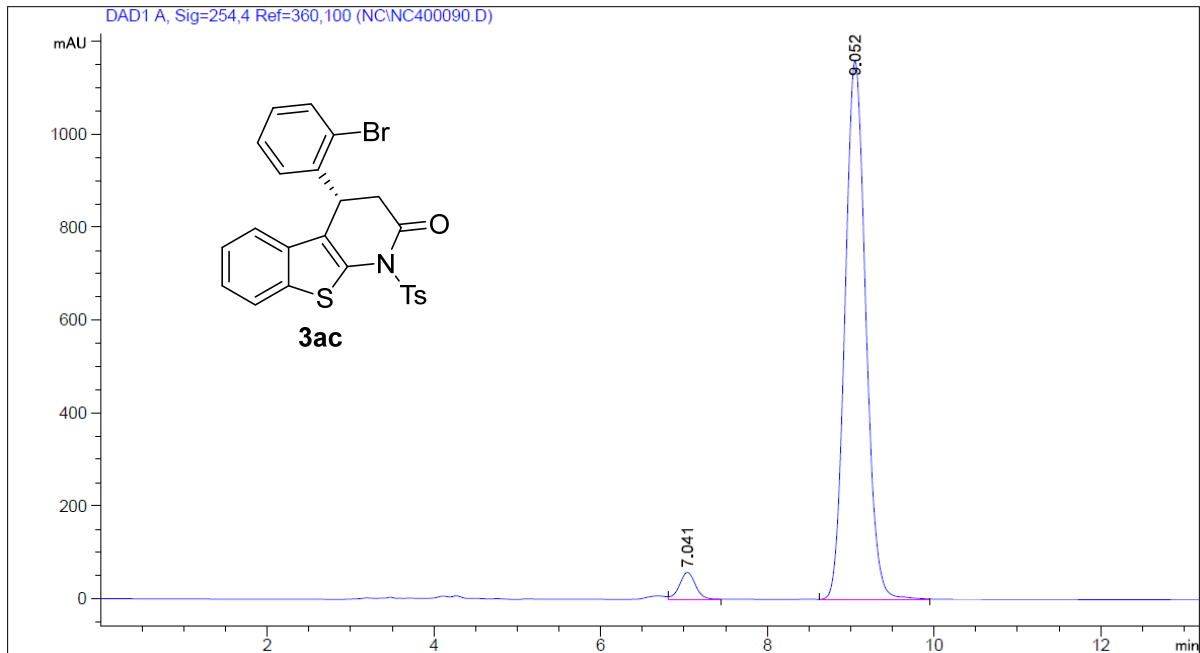

| Peak # | Ret Time [min] | Type | Width [min] | Area [mAU*s] | Height [mAU] | Area %  |
|--------|----------------|------|-------------|--------------|--------------|---------|
| 1      | 7.041          | VB   | 0.2054      | 768.51428    | 57.68219     | 3.7211  |
| 2      | 9.052          | BB   | 0.2682      | 1.98844e4    | 1158.95764   | 96.2789 |

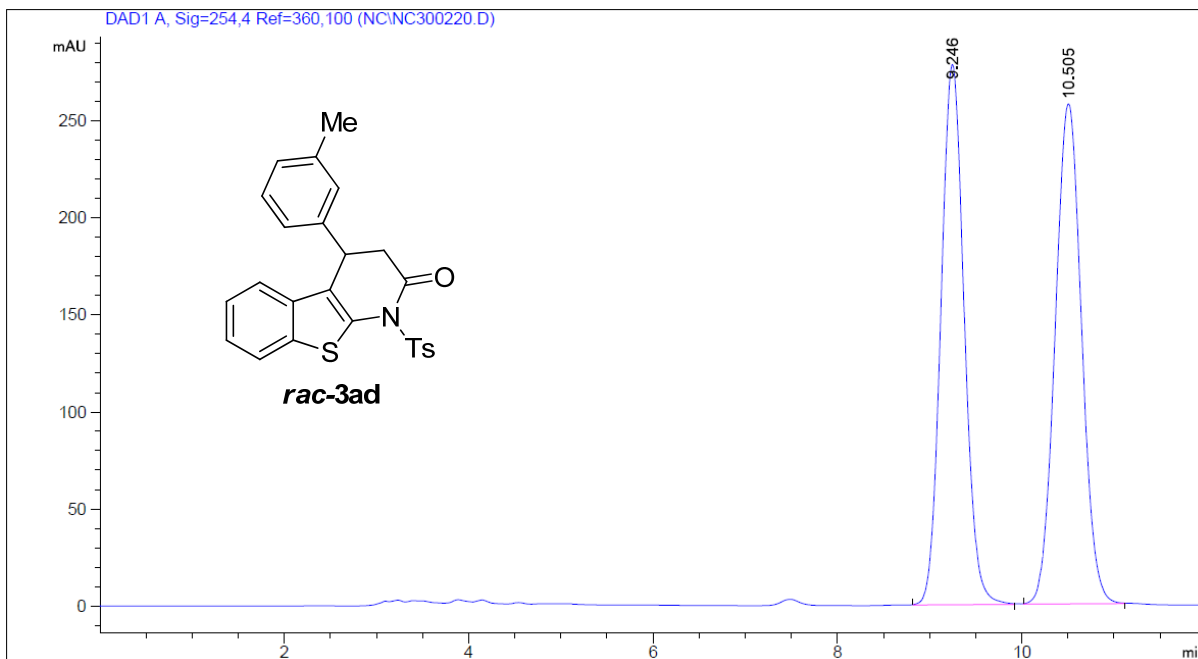

| Peak # | Ret Time [min] | Type | Width [min] | Area [mAU*s] | Height [mAU] | Area %  |
|--------|----------------|------|-------------|--------------|--------------|---------|
| 1      | 9.246          | BB   | 0.2720      | 4864.70068   | 278.26459    | 48.7113 |
| 2      | 10.505         | BB   | 0.3099      | 5122.10645   | 257.64487    | 51.2887 |

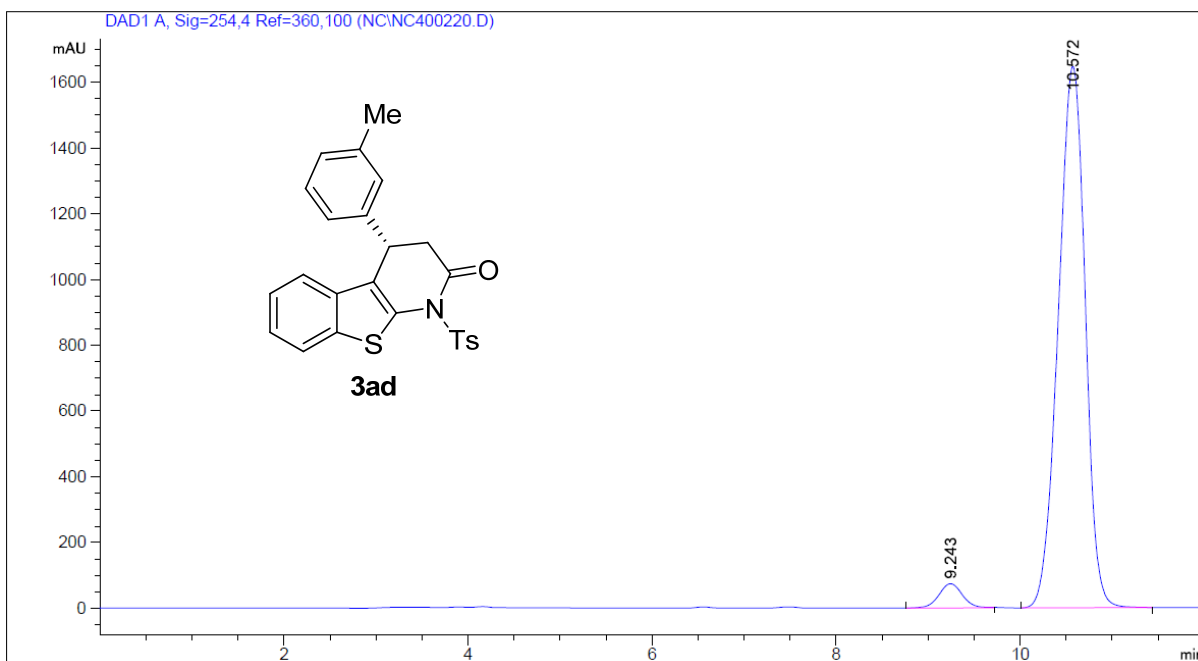

| Peak # | Ret Time [min] | Type | Width [min] | Area [mAU*s] | Height [mAU] | Area %  |
|--------|----------------|------|-------------|--------------|--------------|---------|
| 1      | 9.243          | BB   | 0.2745      | 1315.22803   | 73.58922     | 3.7989  |
| 2      | 10.572         | BB   | 0.3180      | 3.33058e4    | 1646.79858   | 96.2011 |

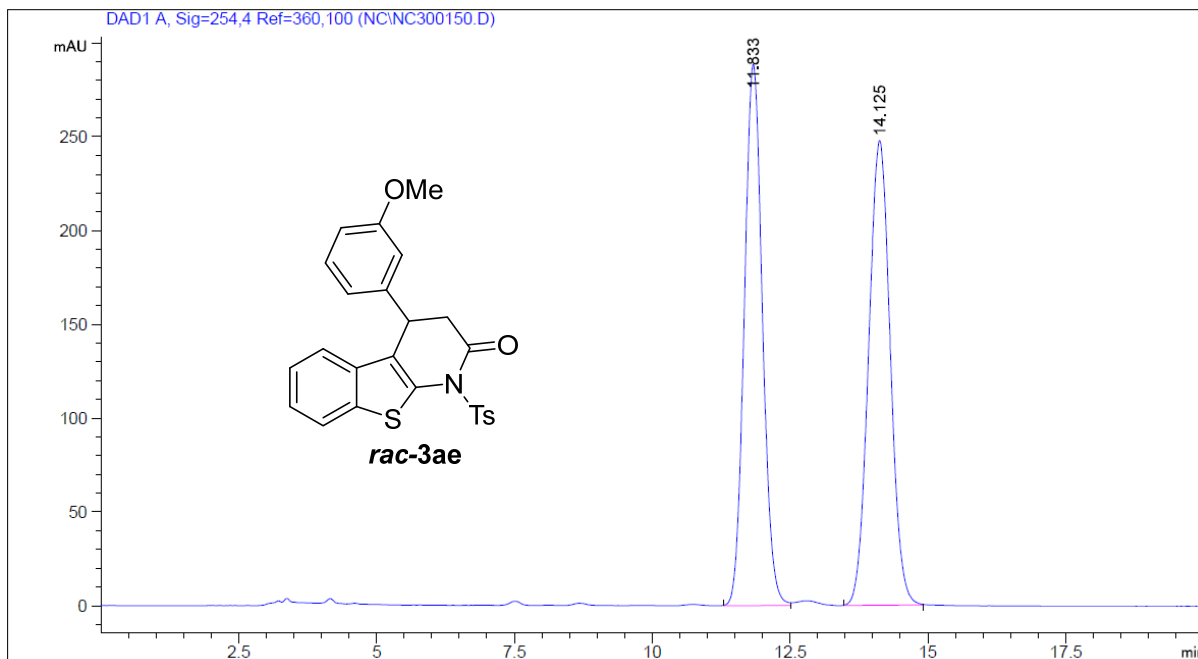

| Peak # | Ret Time [min] | Type | Width [min] | Area [mAU*s] | Height [mAU] | Area %  |
|--------|----------------|------|-------------|--------------|--------------|---------|
| 1      | 11.833         | BB   | 0.3547      | 6596.01563   | 288.57196    | 49.3728 |
| 2      | 14.125         | BB   | 0.4265      | 6763.60400   | 247.71529    | 50.6272 |

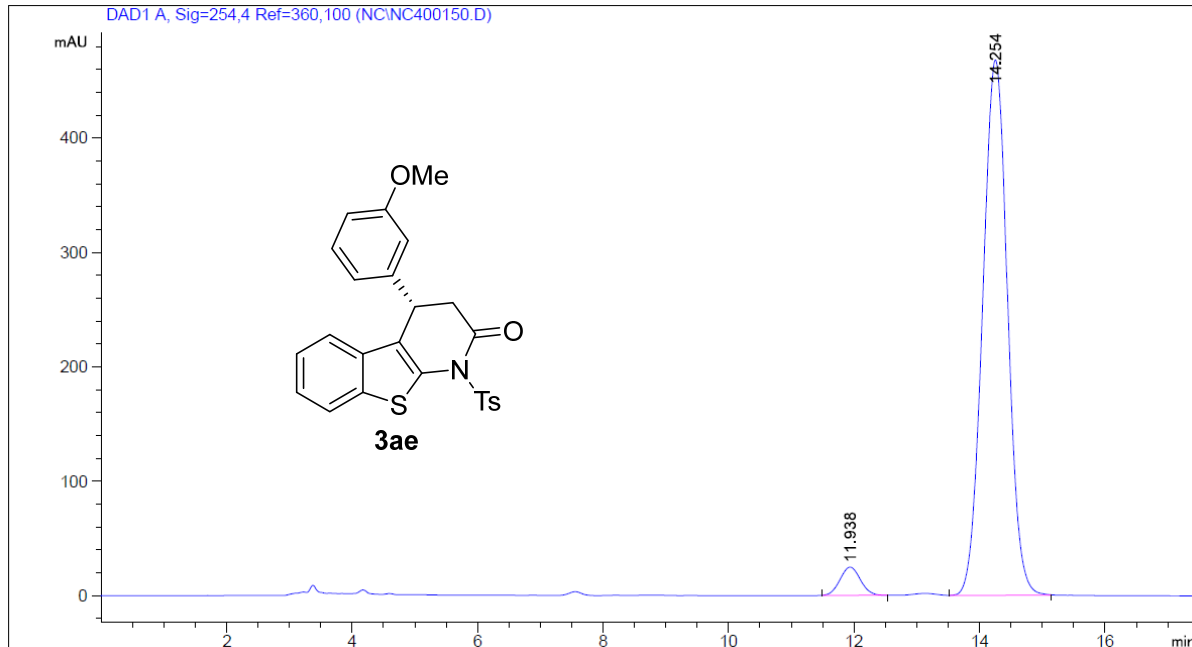

| Peak # | Ret Time [min] | Type | Width [min] | Area [mAU*s] | Height [mAU] | Area %  |
|--------|----------------|------|-------------|--------------|--------------|---------|
| 1      | 11.938         | BB   | 0.3536      | 560.50403    | 24.80362     | 4.1706  |
| 2      | 14.254         | VB   | 0.4309      | 1.28788e4    | 468.21167    | 95.8294 |

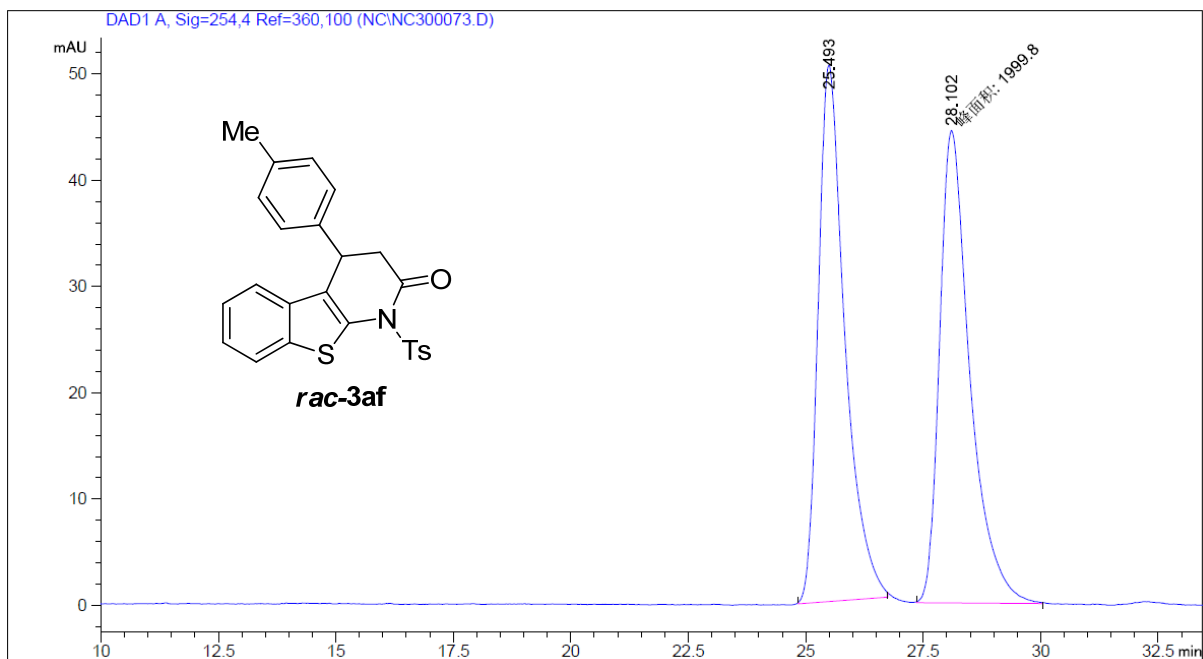

| Peak # | Ret Time [min] | Type | Width [min] | Area [mAU*s] | Height [mAU] | Area %  |
|--------|----------------|------|-------------|--------------|--------------|---------|
| 1      | 25.493         | BB   | 0.5884      | 2000.34912   | 50.46531     | 50.0069 |
| 2      | 28.102         | MM   | 0.7495      | 1999.79639   | 44.46879     | 49.9931 |

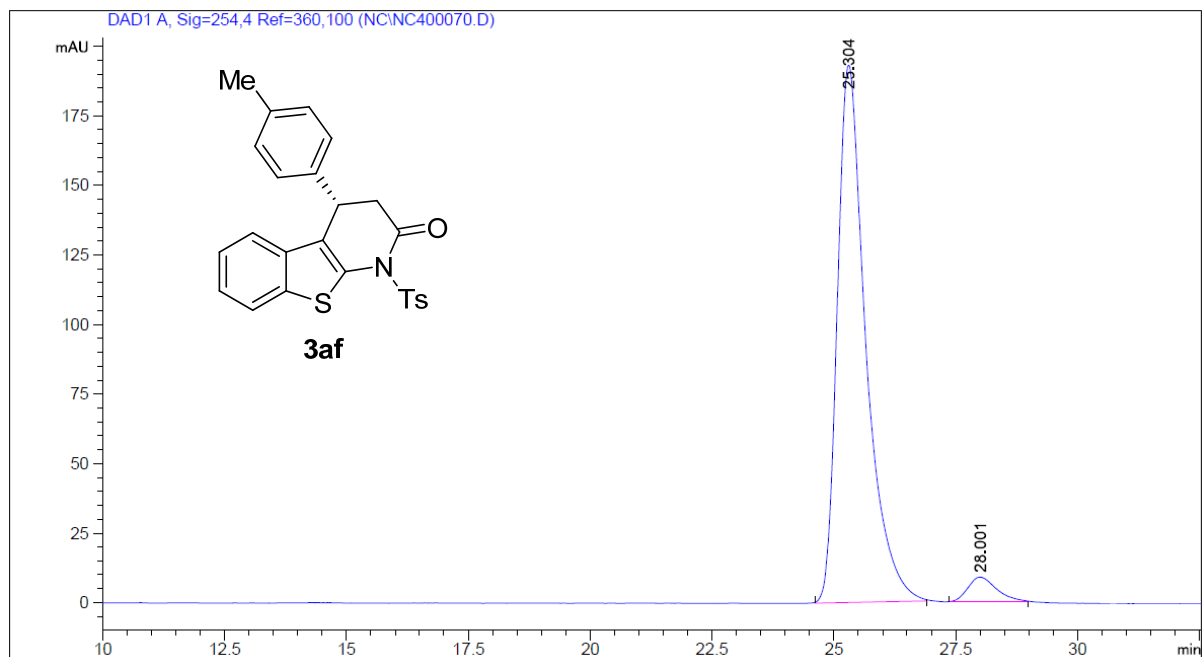

| Peak # | Ret Time [min] | Type | Width [min] | Area [mAU*s] | Height [mAU] | Area %  |
|--------|----------------|------|-------------|--------------|--------------|---------|
| 1      | 25.304         | BB   | 0.6014      | 7836.63428   | 193.12575    | 95.5616 |
| 2      | 28.001         | BB   | 0.5954      | 363.97528    | 8.82138      | 4.4384  |

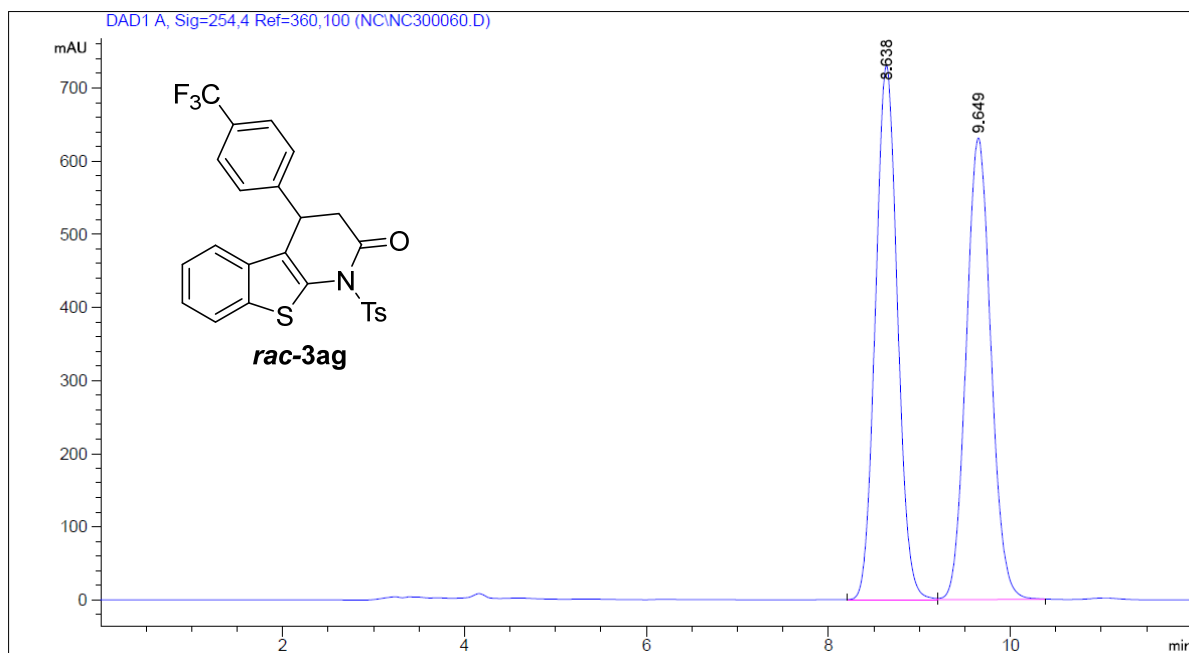

| Peak # | Ret Time [min] | Type | Width [min] | Area [mAU*s] | Height [mAU] | Area %  |
|--------|----------------|------|-------------|--------------|--------------|---------|
| 1      | 8.638          | BV   | 0.2624      | 1.22939e4    | 730.13788    | 50.7255 |
| 2      | 9.649          | VB   | 0.2949      | 1.19422e4    | 630.75793    | 49.2745 |

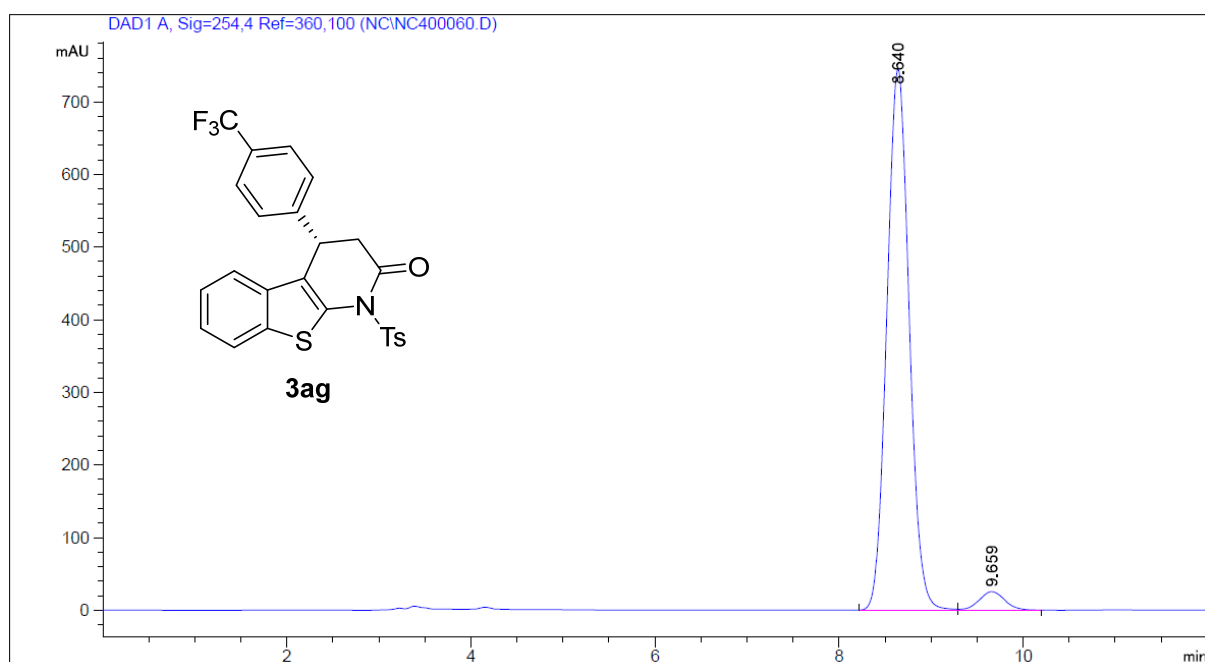

| Peak # | Ret Time [min] | Type | Width [min] | Area [mAU*s] | Height [mAU] | Area %  |
|--------|----------------|------|-------------|--------------|--------------|---------|
| 1      | 8.640          | BB   | 0.2618      | 1.25007e4    | 744.85321    | 96.2384 |
| 2      | 9.659          | BB   | 0.2962      | 488.60422    | 25.42612     | 3.7616  |

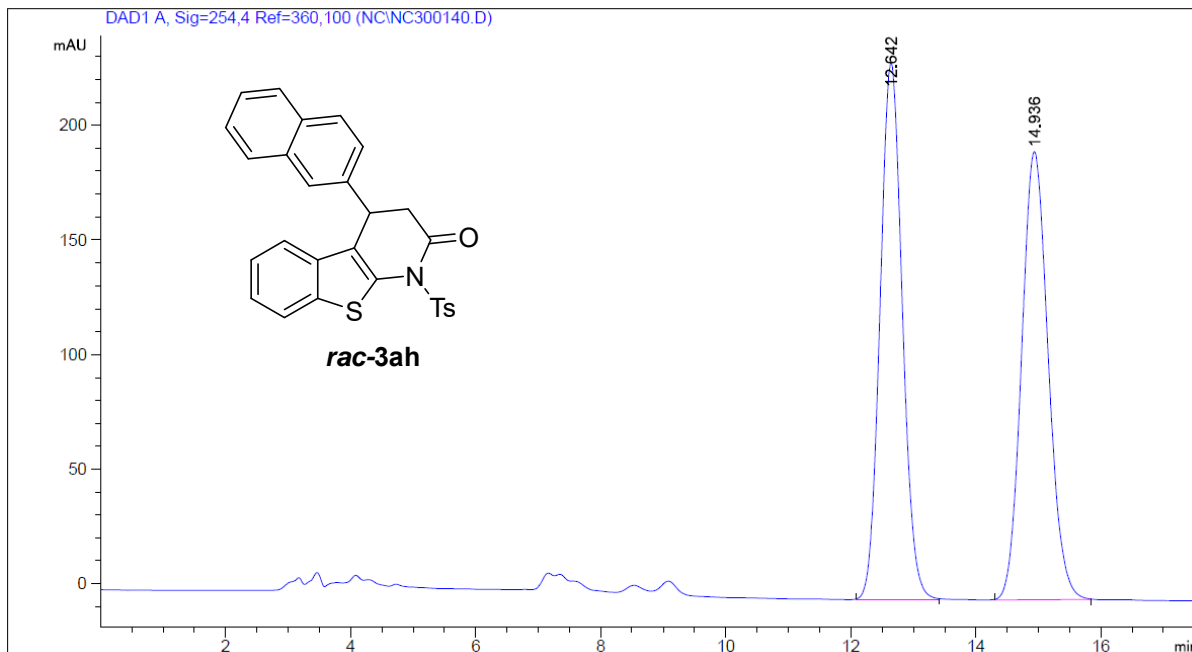

| Peak # | Ret Time [min] | Type | Width [min] | Area [mAU*s] | Height [mAU] | Area %  |
|--------|----------------|------|-------------|--------------|--------------|---------|
| 1      | 12.642         | BB   | 0.3840      | 5777.23340   | 234.03624    | 50.0611 |
| 2      | 14.936         | BB   | 0.4579      | 5763.14209   | 195.50330    | 49.9389 |

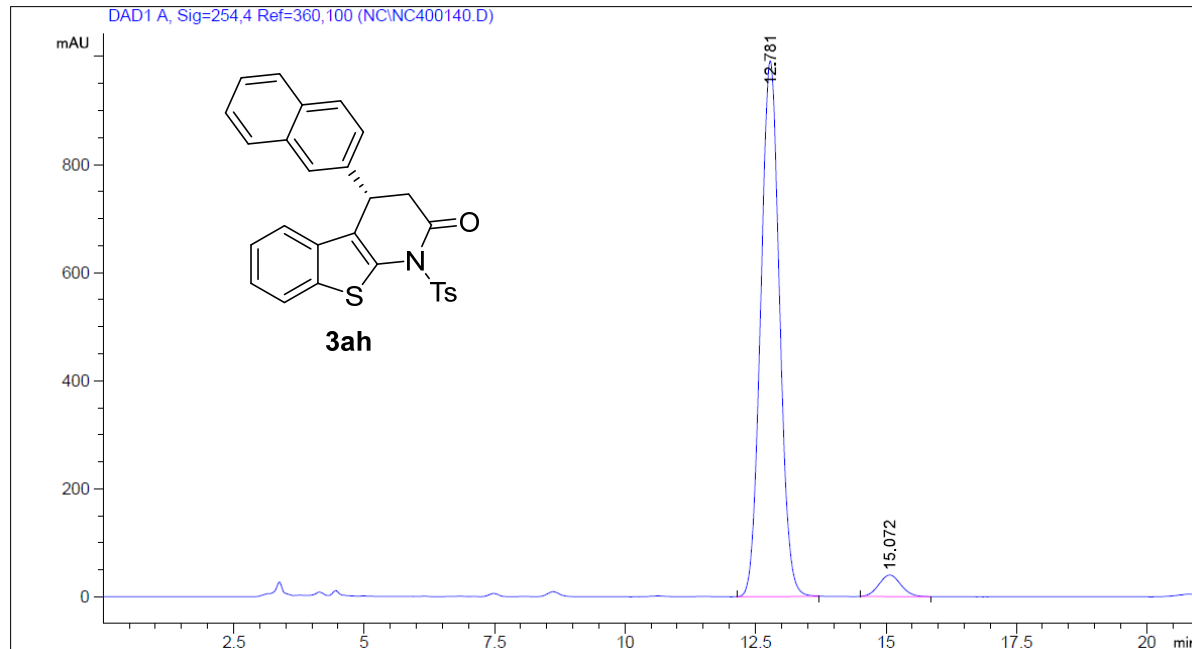

| Peak # | Ret Time [min] | Type | Width [min] | Area [mAU*s] | Height [mAU] | Area %  |
|--------|----------------|------|-------------|--------------|--------------|---------|
| 1      | 12.781         | BB   | 0.3934      | 2.49413e4    | 991.75348    | 95.4801 |
| 2      | 15.072         | BB   | 0.4623      | 1180.68152   | 40.00830     | 4.5199  |

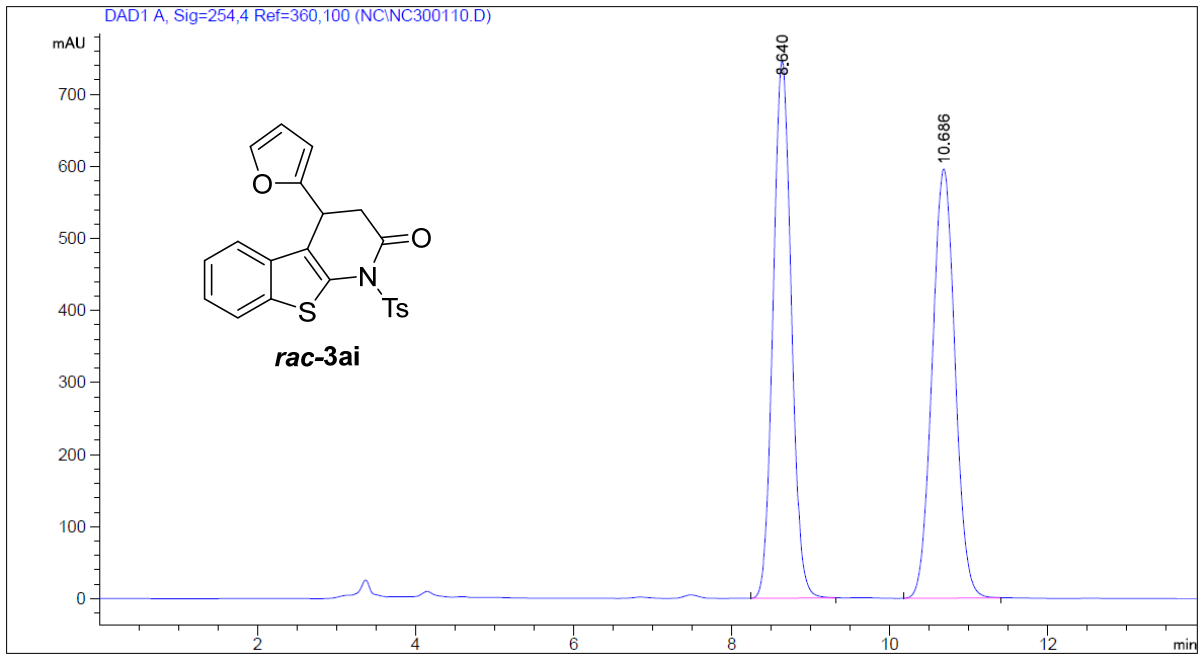

| Peak # | Ret Time [min] | Type | Width [min] | Area [mAU*s] | Height [mAU] | Area %  |
|--------|----------------|------|-------------|--------------|--------------|---------|
| 1      | 8.640          | BB   | 0.2513      | 1.19724e4    | 745.79413    | 49.9747 |
| 2      | 10.686         | BB   | 0.3146      | 1.19845e4    | 595.92627    | 50.0253 |

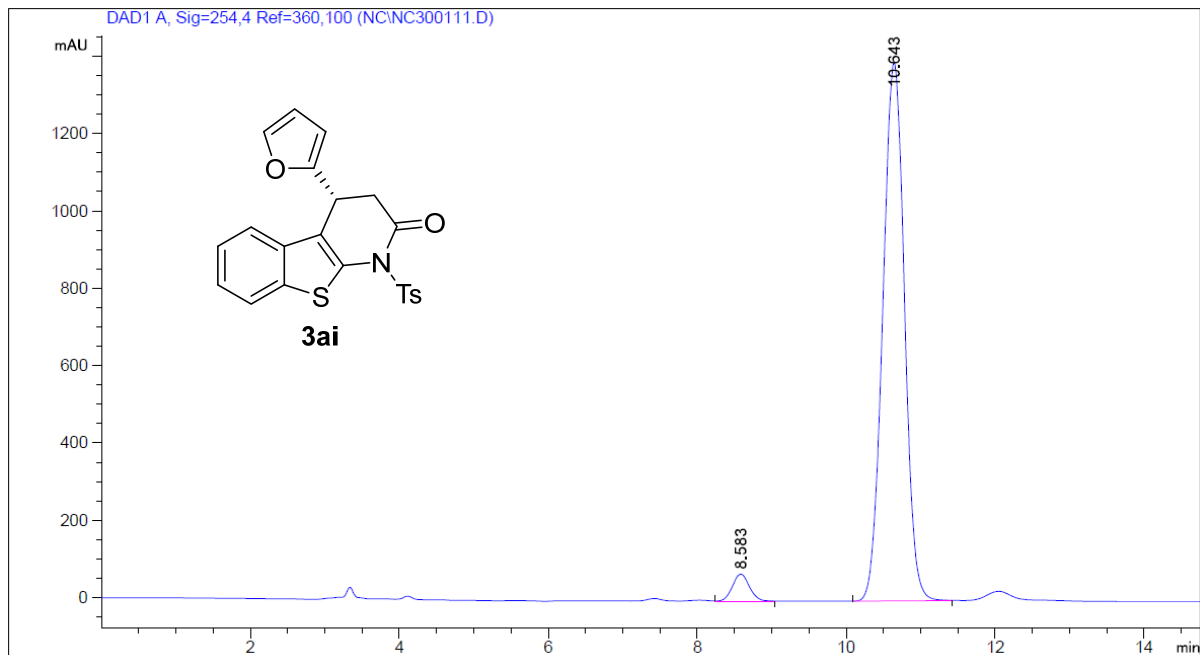

| Peak # | Ret Time [min] | Type | Width [min] | Area [mAU*s] | Height [mAU] | Area %  |
|--------|----------------|------|-------------|--------------|--------------|---------|
| 1      | 8.583          | VB   | 0.2460      | 1099.68030   | 69.72155     | 3.7774  |
| 2      | 10.643         | BB   | 0.3170      | 2.80126e4    | 1390.42419   | 96.2226 |

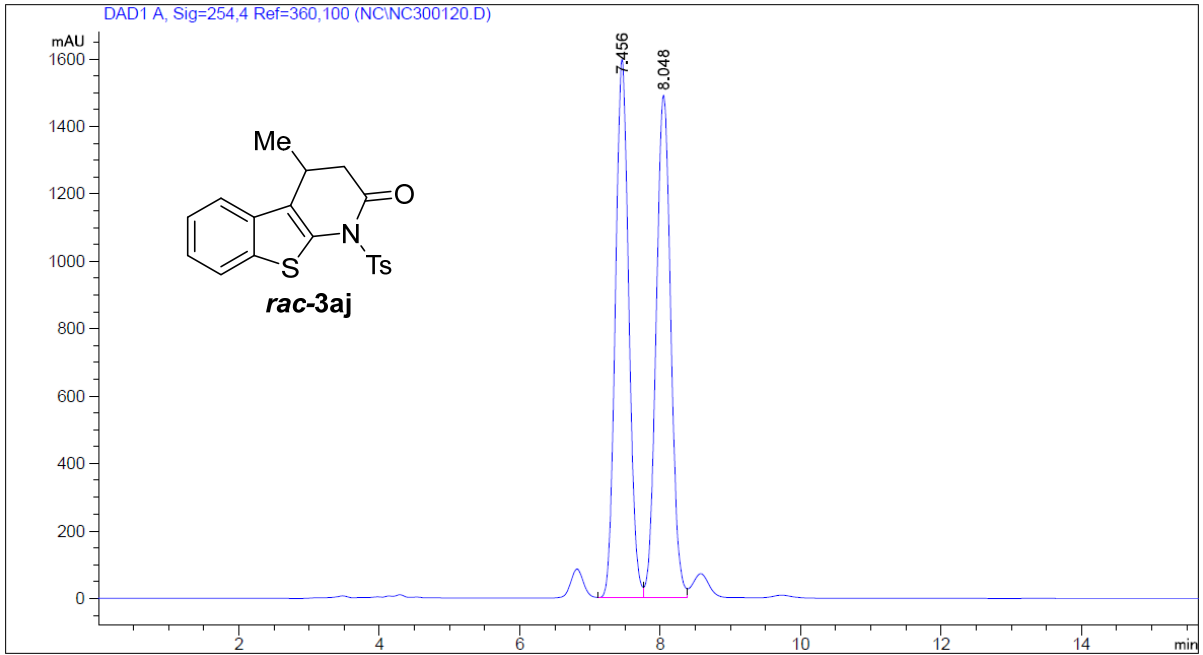

| Peak # | Ret Time [min] | Type | Width [min] | Area [mAU*s] | Height [mAU] | Area %  |
|--------|----------------|------|-------------|--------------|--------------|---------|
| 1      | 7.456          | VV   | 0.2079      | 2.13475e4    | 1597.62170   | 49.6905 |
| 2      | 8.048          | VV   | 0.2272      | 2.16134e4    | 1490.48059   | 50.3095 |

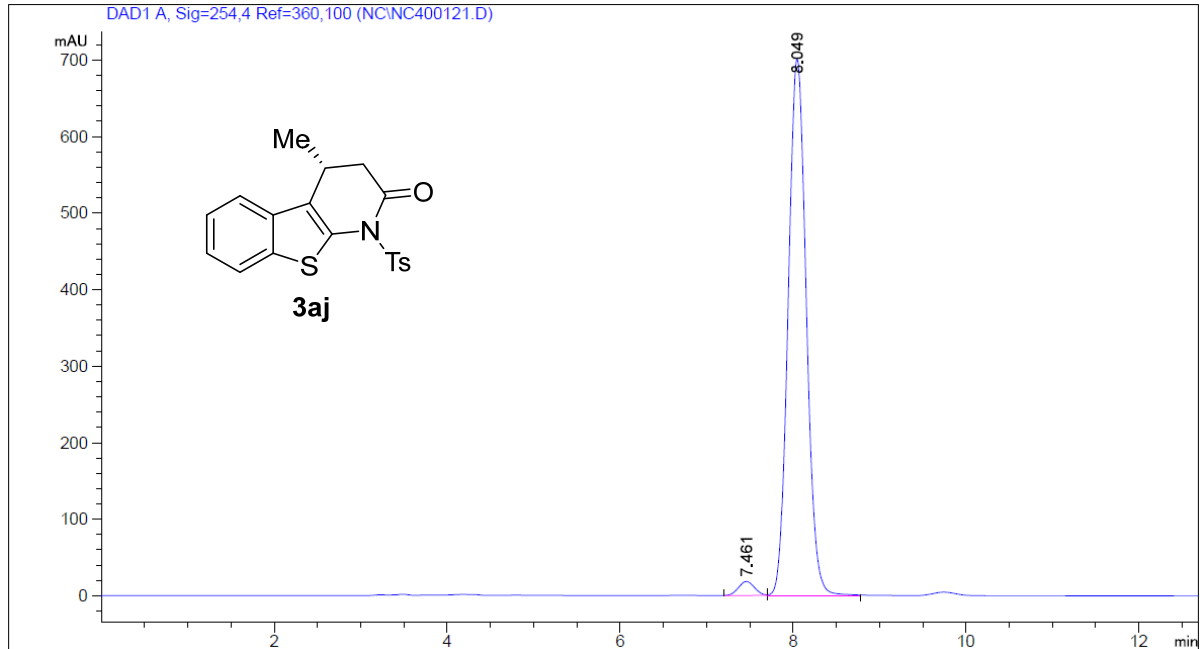

| Peak # | Ret Time [min] | Type | Width [min] | Area [mAU*s] | Height [mAU] | Area %  |
|--------|----------------|------|-------------|--------------|--------------|---------|
| 1      | 7.461          | BV   | 0.2038      | 240.95822    | 18.51769     | 2.3197  |
| 2      | 8.049          | VB   | 0.2248      | 1.01467e4    | 701.26031    | 97.6803 |



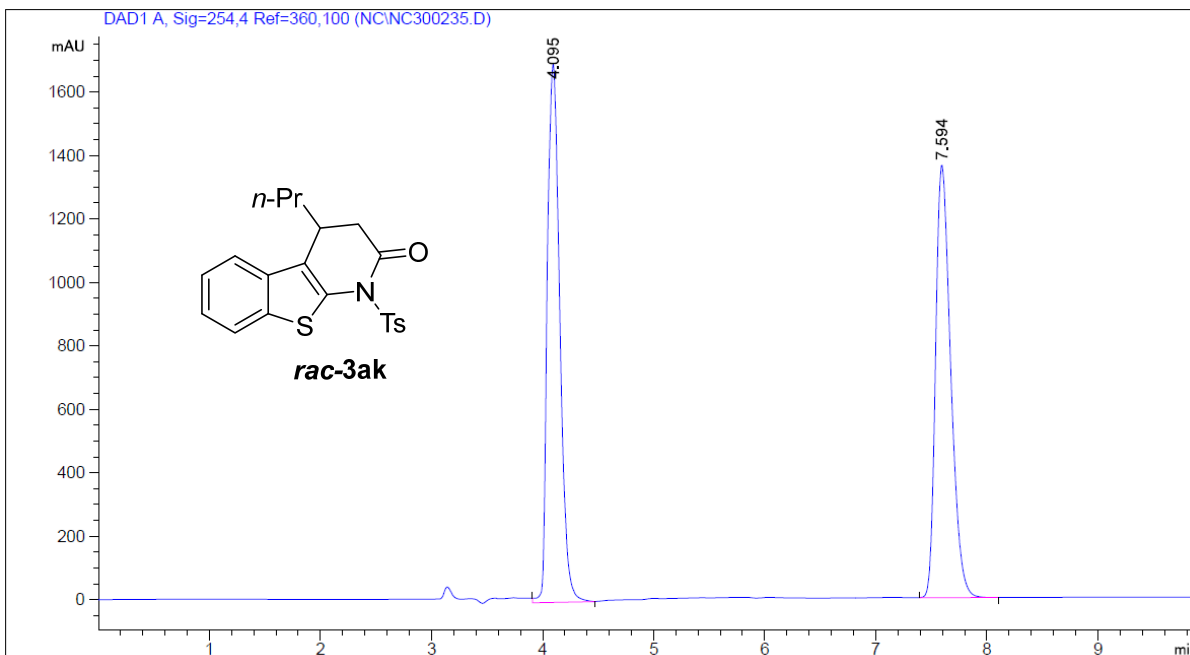

| Peak # | Ret Time [min] | Type | Width [min] | Area [mAU*s] | Height [mAU] | Area %  |
|--------|----------------|------|-------------|--------------|--------------|---------|
| 1      | 4.095          | VV   | 0.1272      | 1.32700e4    | 1697.81409   | 50.7230 |
| 2      | 7.594          | BB   | 0.1443      | 1.28917e4    | 1364.03101   | 49.2770 |

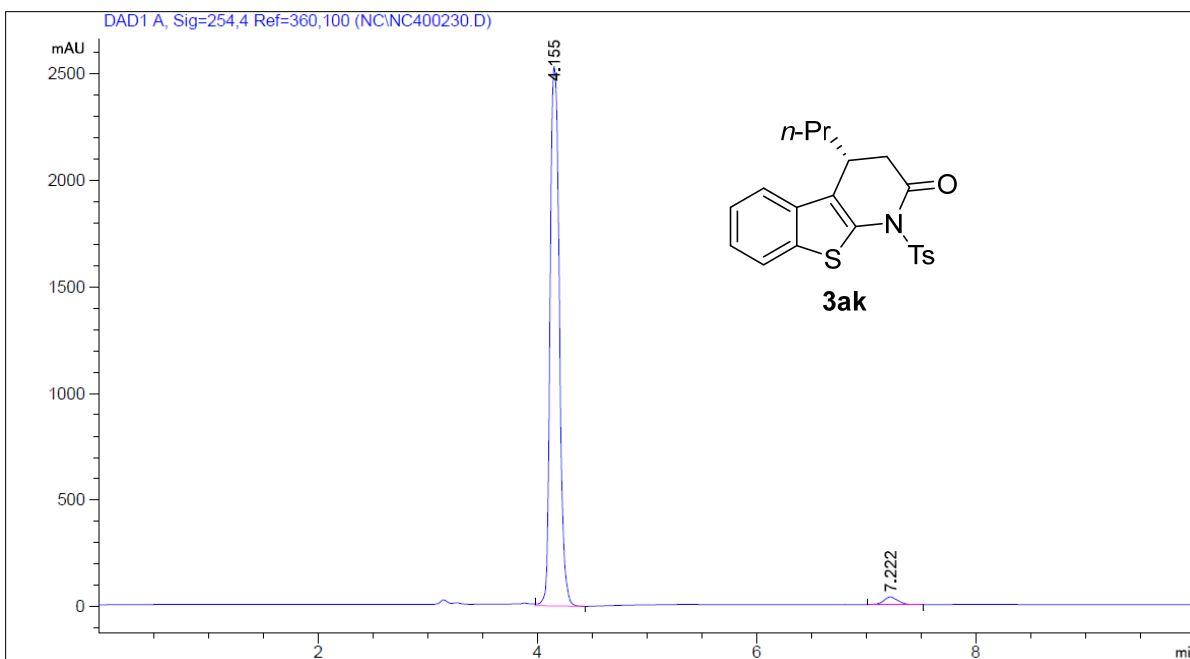

| Peak # | Ret Time [min] | Type | Width [min] | Area [mAU*s] | Height [mAU] | Area %  |
|--------|----------------|------|-------------|--------------|--------------|---------|
| 1      | 4.155          | VV   | 0.0937      | 1.47183e4    | 2535.33423   | 97.8804 |
| 2      | 7.222          | BB   | 0.1352      | 318.71704    | 36.02105     | 2.1196  |

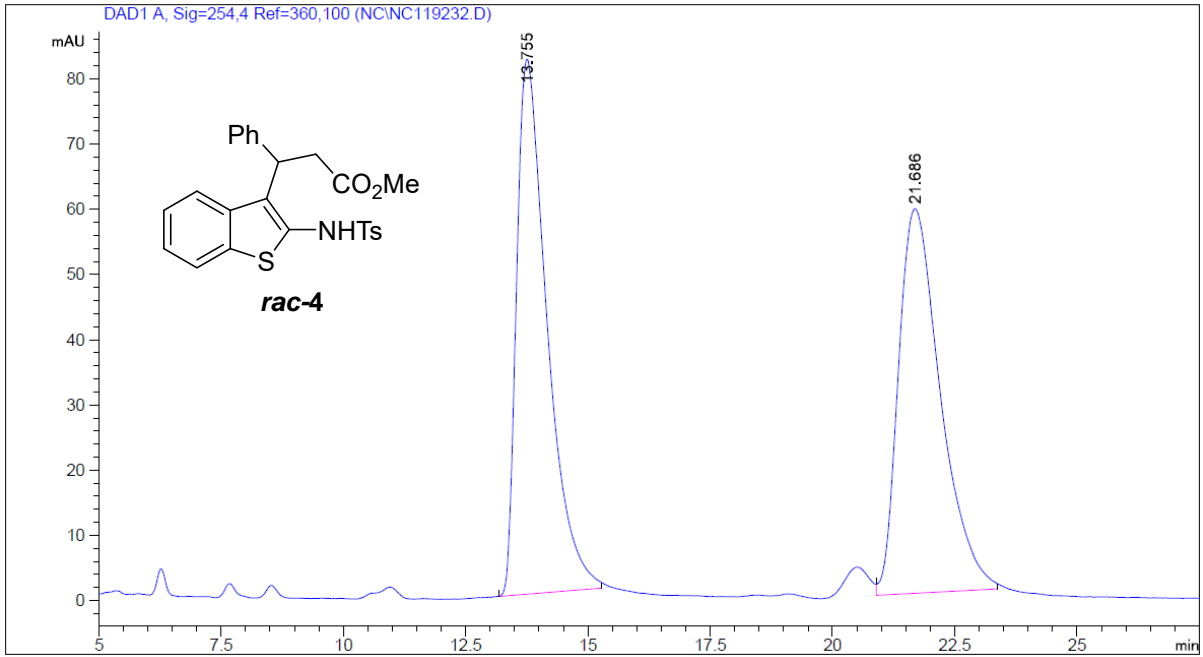

| Peak # | Ret Time [min] | Type | Width [min] | Area [mAU*s] | Height [mAU] | Area %  |
|--------|----------------|------|-------------|--------------|--------------|---------|
| 1      | 13.755         | BB   | 0.6502      | 3557.63403   | 82.00054     | 50.2733 |
| 2      | 21.686         | VB   | 0.8982      | 3518.95898   | 58.97158     | 49.7267 |

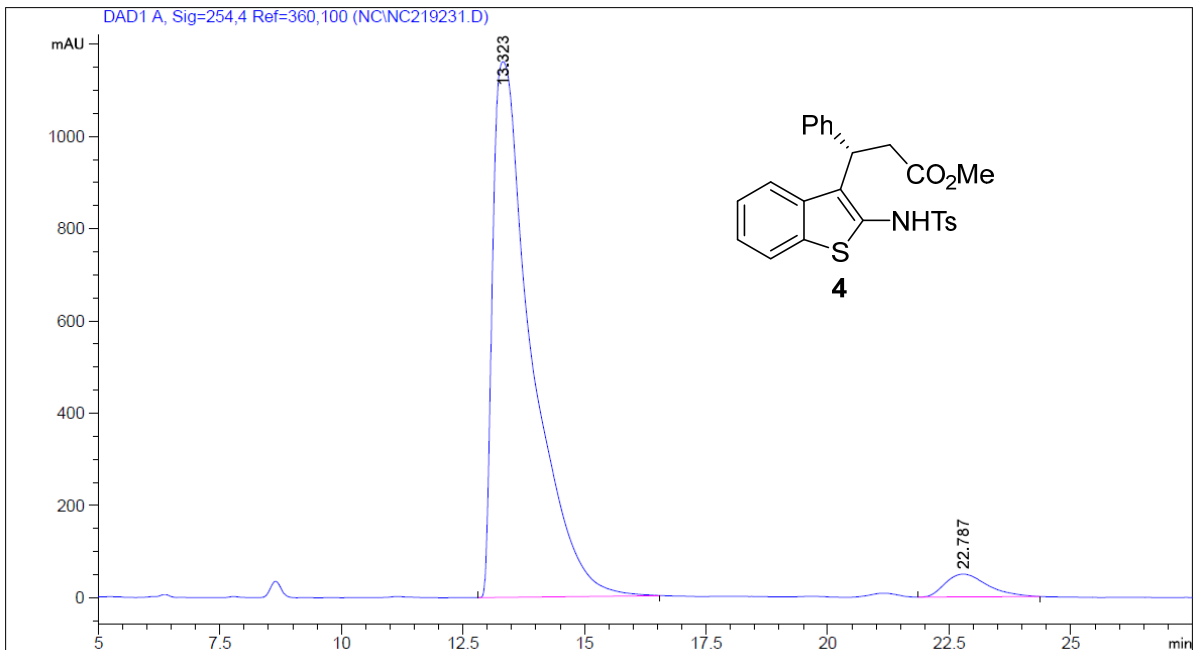

| Peak # | Ret Time [min] | Type | Width [min] | Area [mAU*s] | Height [mAU] | Area %  |
|--------|----------------|------|-------------|--------------|--------------|---------|
| 1      | 13.323         | BB   | 0.7983      | 6.43383e4    | 1161.40356   | 95.5282 |
| 2      | 22.787         | VB   | 0.9295      | 3011.77368   | 49.80738     | 4.4718  |

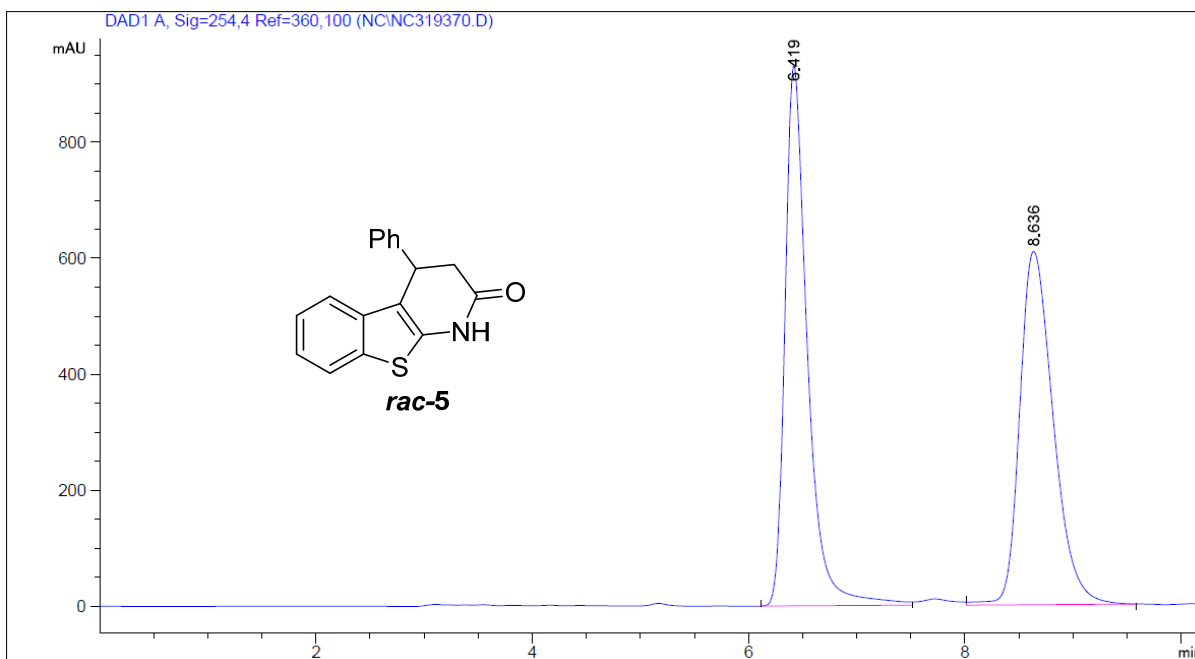

| Peak # | Ret Time [min] | Type | Width [min] | Area [mAU*s] | Height [mAU] | Area %  |
|--------|----------------|------|-------------|--------------|--------------|---------|
| 1      | 6.419          | BB   | 0.2150      | 1.34847e4    | 930.85687    | 50.6516 |
| 2      | 8.636          | VB   | 0.3337      | 1.31378e4    | 609.07458    | 49.3484 |

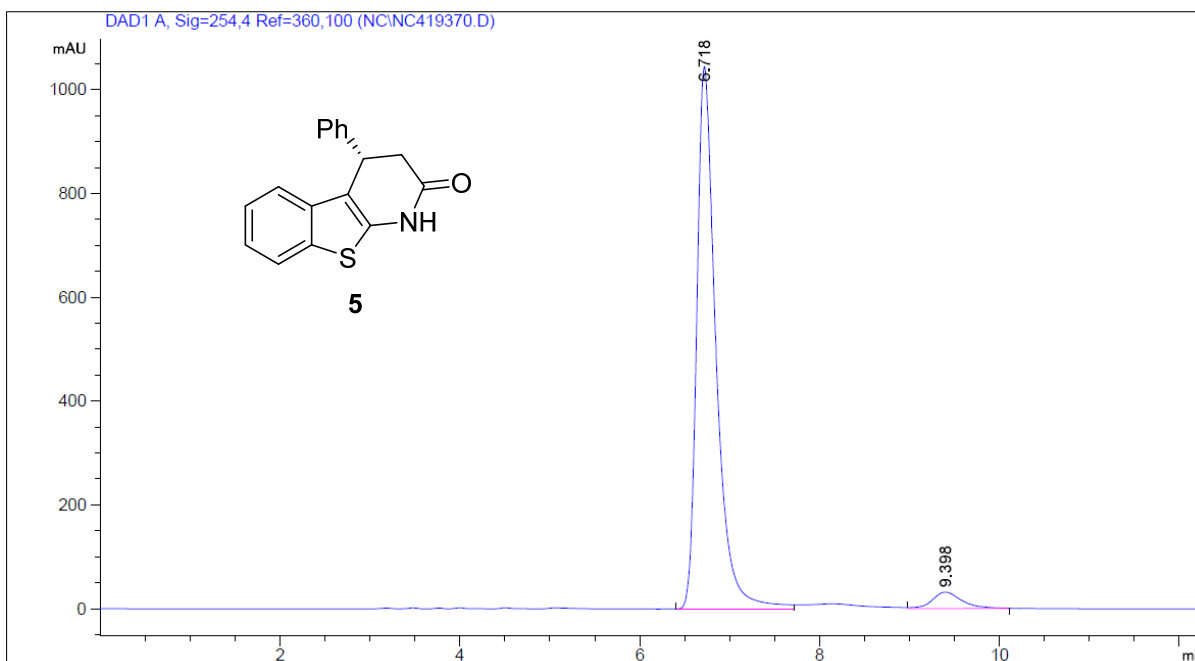

| Peak # | Ret Time [min] | Type | Width [min] | Area [mAU*s] | Height [mAU] | Area %  |
|--------|----------------|------|-------------|--------------|--------------|---------|
| 1      | 6.718          | BB   | 0.2195      | 1.55486e4    | 1045.36438   | 95.4942 |
| 2      | 9.398          | VB   | 0.3434      | 733.63898    | 31.76928     | 4.5058  |

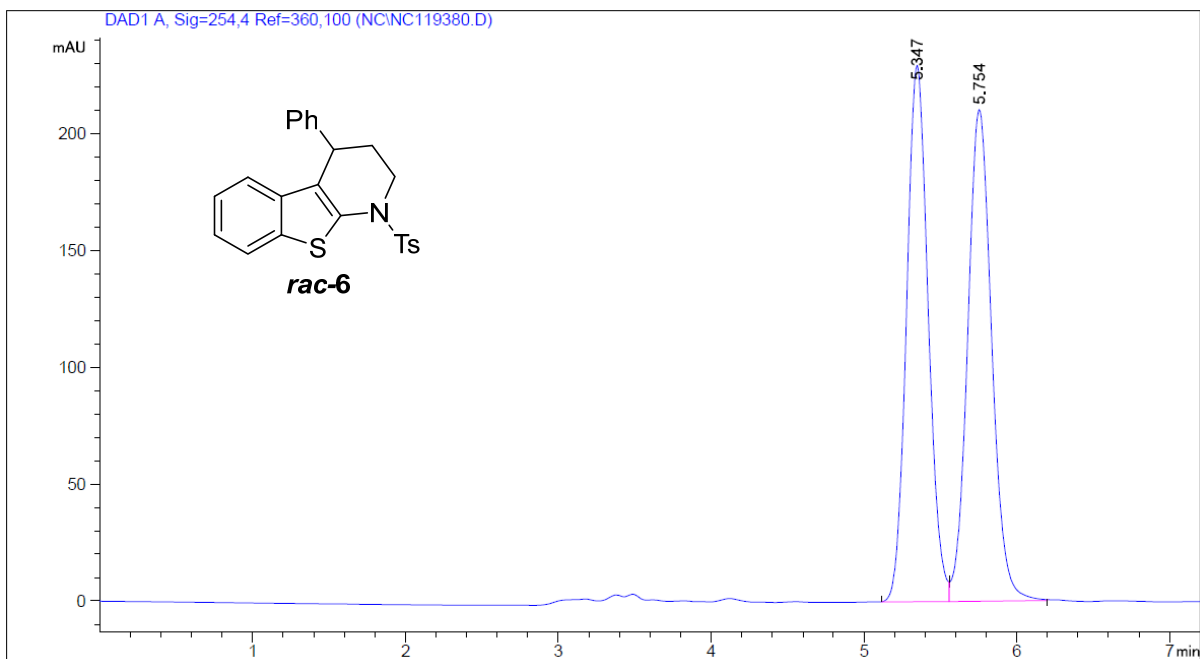

| Peak # | Ret Time [min] | Type | Width [min] | Area [mAU*s] | Height [mAU] | Area %  |
|--------|----------------|------|-------------|--------------|--------------|---------|
| 1      | 5.347          | BV   | 0.1529      | 2262.88306   | 229.67741    | 49.5766 |
| 2      | 5.754          | VB   | 0.1695      | 2301.53662   | 210.52612    | 50.4234 |

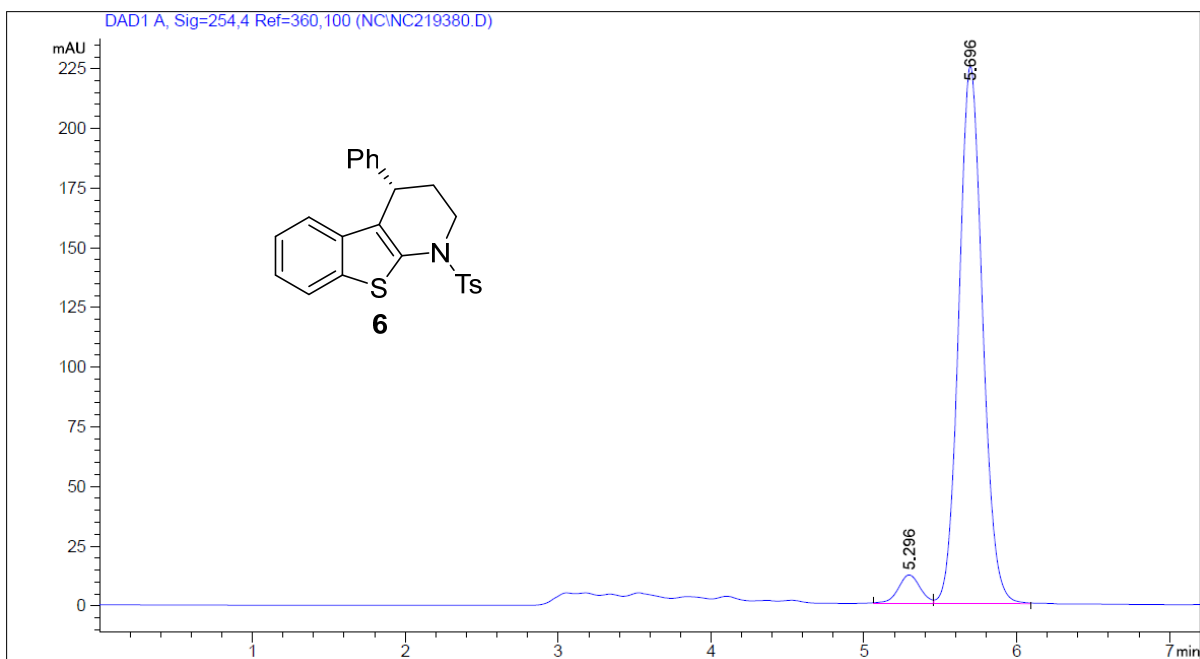

| Peak # | Ret Time [min] | Type | Width [min] | Area [mAU*s] | Height [mAU] | Area %  |
|--------|----------------|------|-------------|--------------|--------------|---------|
| 1      | 5.296          | BV   | 0.1541      | 119.09898    | 11.96582     | 4.6832  |
| 2      | 5.696          | VB   | 0.1676      | 2424.03784   | 225.17192    | 95.3168 |
